# Supplementary material for: Volatile metabolome and floral transcriptome analyses reveal the volatile components of strongly fragrant progeny of Malus × robusta
Source: Front Plant Sci. 2023 Jan 20;14:1065219. doi: 10.3389/fpls.2023.1065219 (PMC9895795; doi:10.3389/fpls.2023.1065219)
Supplement: Supplementary file 2 [file Table_2.xlsx]

## Sheet: 1Cvs2C_all_GOenrich
Category	GOID	Description	GeneRatio	BgRatio	pvalue	padj	geneID	geneName	Count	Up	Up_Gene_id	Down	Down_Gene_id
BP	GO:0015074	DNA integration	11/684	66/11134	0.00210136	0.263668	novel.1954/novel.369/novel.1225/novel.982/novel.1283/novel.2342/novel.3061/novel.343/novel.1912/novel.257/novel.1827	-/-/-/-/-/-/-/-/-/-/-	11	4	novel.369/novel.982/novel.1283/novel.2342	7	novel.1954/novel.1225/novel.3061/novel.343/novel.1912/novel.257/novel.1827
BP	GO:0001101	response to acid chemical	4/684	10/11134	0.00219978	0.263668	HF09067/novel.3141/HF41384/HF10521	-/-/-/-	4	0		4	HF09067/novel.3141/HF41384/HF10521
BP	GO:1901700	response to oxygen-containing compound	4/684	10/11134	0.00219978	0.263668	HF09067/novel.3141/HF41384/HF10521	-/-/-/-	4	0		4	HF09067/novel.3141/HF41384/HF10521
BP	GO:0000272	polysaccharide catabolic process	8/684	40/11134	0.00259133	0.263668	HF04141/HF13132/HF17970/HF04121/HF04116/HF37337/HF26660/novel.2945	-/-/-/-/-/-/-/-	8	4	HF13132/HF17970/HF26660/novel.2945	4	HF04141/HF04121/HF04116/HF37337
BP	GO:0015698	inorganic anion transport	8/684	45/11134	0.00554311	0.451209	HF10664/HF09067/HF01765/HF35138/HF34001/HF41384/HF10670/HF02991	-/-/-/-/-/-/-/-	8	4	HF01765/HF35138/HF34001/HF10670	4	HF10664/HF09067/HF41384/HF02991
BP	GO:0006952	defense response	12/684	87/11134	0.00669156	0.453911	HF40486/HF19175/HF32028/HF43095/novel.2785/HF25337/HF34482/HF26542/HF25022/HF43097/HF34505/HF26544	-/-/-/-/-/-/-/-/-/-/-/-	12	6	HF32028/novel.2785/HF25337/HF34482/HF25022/HF34505	6	HF40486/HF19175/HF43095/HF26542/HF43097/HF26544
BP	GO:0010035	response to inorganic substance	4/684	15/11134	0.0111789	0.591274	HF09067/novel.3141/HF41384/HF10521	-/-/-/-	4	0		4	HF09067/novel.3141/HF41384/HF10521
BP	GO:0005976	polysaccharide metabolic process	15/684	129/11134	0.0126136	0.591274	HF39844/HF04141/HF13132/HF17970/HF16213/HF04121/HF04116/HF37337/HF26660/HF02449/HF39842/HF00861/HF41526/novel.2945/HF27258	-/-/-/-/-/-/-/-/-/-/-/-/-/-/-	15	9	HF13132/HF17970/HF16213/HF26660/HF02449/HF00861/HF41526/novel.2945/HF27258	6	HF39844/HF04141/HF04121/HF04116/HF37337/HF39842
BP	GO:0009607	response to biotic stimulus	7/684	43/11134	0.0149048	0.591274	HF32028/HF43095/novel.2785/HF26542/HF43097/HF34505/HF26544	-/-/-/-/-/-/-	7	3	HF32028/novel.2785/HF34505	4	HF43095/HF26542/HF43097/HF26544
BP	GO:0051704	multi-organism process	11/684	86/11134	0.0158285	0.591274	HF04488/HF33591/novel.1848/HF32028/HF04483/HF12185/HF33597/novel.1037/HF33640/novel.300/HF34505	-/-/-/-/-/-/-/-/-/-/-	11	7	HF04488/novel.1848/HF32028/HF33597/HF33640/novel.300/HF34505	4	HF33591/HF04483/HF12185/novel.1037
BP	GO:0006820	anion transport	13/684	109/11134	0.0159804	0.591274	HF10664/HF09067/HF26381/HF01765/HF35138/HF34001/HF32702/HF41384/HF10670/HF20877/HF00126/HF01213/HF02991	-/-/-/-/-/-/-/-/-/-/-/-/-	13	8	HF26381/HF01765/HF35138/HF34001/HF10670/HF20877/HF00126/HF01213	5	HF10664/HF09067/HF32702/HF41384/HF02991
BP	GO:0006950	response to stress	37/684	424/11134	0.0192148	0.651702	HF40486/HF40774/HF18566/HF02241/HF07024/HF19175/HF32028/HF24599/HF33636/HF25885/HF43095/novel.3141/novel.3057/HF28512/novel.2785/HF25337/HF34482/HF23619/HF39717/HF26542/HF25022/HF13974/HF42298/HF43040/HF09484/HF39725/HF23507/HF43097/HF26468/HF10521/novel.2567/HF01608/HF42276/HF25735/HF34505/HF01865/HF26544	-/-/-/-/-/-/-/-/-/-/-/-/-/-/-/-/-/-/-/-/-/-/-/-/-/-/-/-/-/-/-/-/-/-/-/-/-	37	21	HF40774/HF18566/HF02241/HF32028/HF33636/HF25885/novel.3057/HF28512/novel.2785/HF25337/HF34482/HF23619/HF25022/HF43040/HF09484/HF23507/HF26468/HF01608/HF42276/HF25735/HF34505	16	HF40486/HF07024/HF19175/HF24599/HF43095/novel.3141/HF39717/HF26542/HF13974/HF42298/HF39725/HF43097/HF10521/novel.2567/HF01865/HF26544
BP	GO:0006979	response to oxidative stress	14/684	130/11134	0.0284508	0.890729	HF40774/HF18566/HF02241/HF07024/HF23619/HF39717/HF13974/HF43040/HF39725/HF26468/novel.2567/HF01608/HF42276/HF25735	-/-/-/-/-/-/-/-/-/-/-/-/-/-	14	9	HF40774/HF18566/HF02241/HF23619/HF43040/HF26468/HF01608/HF42276/HF25735	5	HF07024/HF39717/HF13974/HF39725/novel.2567
BP	GO:0006825	copper ion transport	3/684	13/11134	0.0415746	0.999765	HF21234/HF03283/HF25617	-/-/-	3	2	HF21234/HF25617	1	HF03283
BP	GO:0008037	cell recognition	9/684	78/11134	0.0489713	0.999765	HF04488/HF33591/novel.1848/HF04483/HF12185/HF33597/novel.1037/HF33640/novel.300	-/-/-/-/-/-/-/-/-	9	5	HF04488/novel.1848/HF33597/HF33640/novel.300	4	HF33591/HF04483/HF12185/novel.1037
BP	GO:0009856	pollination	9/684	78/11134	0.0489713	0.999765	HF04488/HF33591/novel.1848/HF04483/HF12185/HF33597/novel.1037/HF33640/novel.300	-/-/-/-/-/-/-/-/-	9	5	HF04488/novel.1848/HF33597/HF33640/novel.300	4	HF33591/HF04483/HF12185/novel.1037
BP	GO:0009875	pollen-pistil interaction	9/684	78/11134	0.0489713	0.999765	HF04488/HF33591/novel.1848/HF04483/HF12185/HF33597/novel.1037/HF33640/novel.300	-/-/-/-/-/-/-/-/-	9	5	HF04488/novel.1848/HF33597/HF33640/novel.300	4	HF33591/HF04483/HF12185/novel.1037
BP	GO:0044706	multi-multicellular organism process	9/684	78/11134	0.0489713	0.999765	HF04488/HF33591/novel.1848/HF04483/HF12185/HF33597/novel.1037/HF33640/novel.300	-/-/-/-/-/-/-/-/-	9	5	HF04488/novel.1848/HF33597/HF33640/novel.300	4	HF33591/HF04483/HF12185/novel.1037
BP	GO:0048544	recognition of pollen	9/684	78/11134	0.0489713	0.999765	HF04488/HF33591/novel.1848/HF04483/HF12185/HF33597/novel.1037/HF33640/novel.300	-/-/-/-/-/-/-/-/-	9	5	HF04488/novel.1848/HF33597/HF33640/novel.300	4	HF33591/HF04483/HF12185/novel.1037
BP	GO:0000003	reproduction	9/684	83/11134	0.0676665	0.999765	HF04488/HF33591/novel.1848/HF04483/HF12185/HF33597/novel.1037/HF33640/novel.300	-/-/-/-/-/-/-/-/-	9	5	HF04488/novel.1848/HF33597/HF33640/novel.300	4	HF33591/HF04483/HF12185/novel.1037
BP	GO:0022414	reproductive process	9/684	83/11134	0.0676665	0.999765	HF04488/HF33591/novel.1848/HF04483/HF12185/HF33597/novel.1037/HF33640/novel.300	-/-/-/-/-/-/-/-/-	9	5	HF04488/novel.1848/HF33597/HF33640/novel.300	4	HF33591/HF04483/HF12185/novel.1037
BP	GO:0000041	transition metal ion transport	3/684	17/11134	0.0825197	0.999765	HF21234/HF03283/HF25617	-/-/-	3	2	HF21234/HF25617	1	HF03283
BP	GO:0042221	response to chemical	17/684	196/11134	0.0947025	0.999765	novel.917/HF37826/HF04077/HF09067/novel.3141/HF41384/HF35144/HF36534/HF19076/HF28531/HF36533/HF10521/HF30631/HF02632/HF04880/HF26049/HF15075	-/-/-/-/-/-/-/-/-/-/-/-/-/-/-/-/-	17	10	HF37826/HF35144/HF36534/HF28531/HF36533/HF30631/HF02632/HF04880/HF26049/HF15075	7	novel.917/HF04077/HF09067/novel.3141/HF41384/HF19076/HF10521
BP	GO:0045017	glycerolipid biosynthetic process	5/684	40/11134	0.0963703	0.999765	HF41626/HF32379/HF18756/HF32382/HF32368	-/-/-/-/-	5	2	HF41626/HF18756	3	HF32379/HF32382/HF32368
BP	GO:0006694	steroid biosynthetic process	3/684	20/11134	0.121039	0.999765	HF02462/HF37260/HF08593	-/-/-	3	1	HF37260	2	HF02462/HF08593
BP	GO:0035434	copper ion transmembrane transport	2/684	10/11134	0.122267	0.999765	HF21234/HF25617	-/-	2	2	HF21234/HF25617	0
BP	GO:0016052	carbohydrate catabolic process	10/684	108/11134	0.126591	0.999765	HF04141/HF13132/HF17970/HF12316/HF04121/HF04116/HF37337/HF26660/HF28597/novel.2945	-/-/-/-/-/-/-/-/-/-	10	5	HF13132/HF17970/HF12316/HF26660/novel.2945	5	HF04141/HF04121/HF04116/HF37337/HF28597
BP	GO:0007059	chromosome segregation	3/684	21/11134	0.135108	0.999765	HF04285/HF27091/HF30340	-/-/-	3	0		3	HF04285/HF27091/HF30340
BP	GO:0006026	aminoglycan catabolic process	2/684	11/11134	0.143598	0.999765	HF30940/HF19224	-/-	2	1	HF30940	1	HF19224
BP	GO:0006030	chitin metabolic process	2/684	11/11134	0.143598	0.999765	HF30940/HF19224	-/-	2	1	HF30940	1	HF19224
BP	GO:0006032	chitin catabolic process	2/684	11/11134	0.143598	0.999765	HF30940/HF19224	-/-	2	1	HF30940	1	HF19224
BP	GO:0006040	amino sugar metabolic process	2/684	11/11134	0.143598	0.999765	HF30940/HF19224	-/-	2	1	HF30940	1	HF19224
BP	GO:0016998	cell wall macromolecule catabolic process	2/684	11/11134	0.143598	0.999765	HF30940/HF19224	-/-	2	1	HF30940	1	HF19224
BP	GO:0044036	cell wall macromolecule metabolic process	2/684	11/11134	0.143598	0.999765	HF30940/HF19224	-/-	2	1	HF30940	1	HF19224
BP	GO:0046348	amino sugar catabolic process	2/684	11/11134	0.143598	0.999765	HF30940/HF19224	-/-	2	1	HF30940	1	HF19224
BP	GO:1901071	glucosamine-containing compound metabolic process	2/684	11/11134	0.143598	0.999765	HF30940/HF19224	-/-	2	1	HF30940	1	HF19224
BP	GO:1901072	glucosamine-containing compound catabolic process	2/684	11/11134	0.143598	0.999765	HF30940/HF19224	-/-	2	1	HF30940	1	HF19224
BP	GO:0008202	steroid metabolic process	3/684	22/11134	0.149705	0.999765	HF02462/HF37260/HF08593	-/-/-	3	1	HF37260	2	HF02462/HF08593
BP	GO:0032501	multicellular organismal process	10/684	112/11134	0.149855	0.999765	HF04488/HF33591/novel.1848/HF04483/HF12185/HF33597/novel.1037/HF33640/HF35094/novel.300	-/-/-/-/-/-/-/-/-/-	10	6	HF04488/novel.1848/HF33597/HF33640/HF35094/novel.300	4	HF33591/HF04483/HF12185/novel.1037
BP	GO:0019684	photosynthesis, light reaction	2/684	12/11134	0.165623	0.999765	HF13920/HF35703	-/-	2	0		2	HF13920/HF35703
BP	GO:0031123	RNA 3'-end processing	3/684	25/11134	0.196144	0.999765	HF25578/HF32196/HF25582	-/-/-	3	3	HF25578/HF32196/HF25582	0
BP	GO:0019318	hexose metabolic process	4/684	38/11134	0.202953	0.999765	novel.2730/HF34876/HF17404/HF26207	-/-/-/-	4	0		4	novel.2730/HF34876/HF17404/HF26207
BP	GO:0042737	drug catabolic process	2/684	14/11134	0.211113	0.999765	HF30940/HF19224	-/-	2	1	HF30940	1	HF19224
BP	GO:0006006	glucose metabolic process	3/684	26/11134	0.212335	0.999765	HF34876/HF17404/HF26207	-/-/-	3	0		3	HF34876/HF17404/HF26207
BP	GO:0006855	drug transmembrane transport	7/684	80/11134	0.219779	0.999765	HF37826/HF04077/HF35144/HF36534/HF36533/HF30631/HF15075	-/-/-/-/-/-/-	7	6	HF37826/HF35144/HF36534/HF36533/HF30631/HF15075	1	HF04077
BP	GO:0015893	drug transport	7/684	80/11134	0.219779	0.999765	HF37826/HF04077/HF35144/HF36534/HF36533/HF30631/HF15075	-/-/-/-/-/-/-	7	6	HF37826/HF35144/HF36534/HF36533/HF30631/HF15075	1	HF04077
BP	GO:0042493	response to drug	7/684	80/11134	0.219779	0.999765	HF37826/HF04077/HF35144/HF36534/HF36533/HF30631/HF15075	-/-/-/-/-/-/-	7	6	HF37826/HF35144/HF36534/HF36533/HF30631/HF15075	1	HF04077
BP	GO:0009733	response to auxin	6/684	67/11134	0.228163	0.999765	novel.917/HF19076/HF28531/HF02632/HF04880/HF26049	-/-/-/-/-/-	6	4	HF28531/HF02632/HF04880/HF26049	2	novel.917/HF19076
BP	GO:0000070	mitotic sister chromatid segregation	2/684	15/11134	0.234297	0.999765	HF04285/HF30340	-/-	2	0		2	HF04285/HF30340
BP	GO:0000819	sister chromatid segregation	2/684	15/11134	0.234297	0.999765	HF04285/HF30340	-/-	2	0		2	HF04285/HF30340
BP	GO:0008272	sulfate transport	2/684	15/11134	0.234297	0.999765	HF01765/HF02991	-/-	2	1	HF01765	1	HF02991
BP	GO:0072348	sulfur compound transport	2/684	15/11134	0.234297	0.999765	HF01765/HF02991	-/-	2	1	HF01765	1	HF02991
BP	GO:0140014	mitotic nuclear division	2/684	15/11134	0.234297	0.999765	HF04285/HF30340	-/-	2	0		2	HF04285/HF30340
BP	GO:0008610	lipid biosynthetic process	14/684	185/11134	0.246962	0.999765	HF26931/novel.278/HF41626/novel.551/HF02462/HF32379/HF25881/HF37260/HF08475/HF22428/HF18756/HF32382/HF32368/HF08593	-/-/-/-/-/-/-/-/-/-/-/-/-/-	14	7	HF41626/novel.551/HF25881/HF37260/HF08475/HF22428/HF18756	7	HF26931/novel.278/HF02462/HF32379/HF32382/HF32368/HF08593
BP	GO:0005996	monosaccharide metabolic process	4/684	42/11134	0.256479	0.999765	novel.2730/HF34876/HF17404/HF26207	-/-/-/-	4	0		4	novel.2730/HF34876/HF17404/HF26207
BP	GO:0009628	response to abiotic stimulus	2/684	16/11134	0.257615	0.999765	novel.3141/HF10521	-/-	2	0		2	novel.3141/HF10521
BP	GO:0006022	aminoglycan metabolic process	2/684	17/11134	0.280961	0.999765	HF30940/HF19224	-/-	2	1	HF30940	1	HF19224
BP	GO:0006094	gluconeogenesis	2/684	17/11134	0.280961	0.999765	HF34876/HF17404	-/-	2	0		2	HF34876/HF17404
BP	GO:0006821	chloride transport	2/684	17/11134	0.280961	0.999765	HF10664/HF10670	-/-	2	1	HF10670	1	HF10664
BP	GO:0019319	hexose biosynthetic process	2/684	17/11134	0.280961	0.999765	HF34876/HF17404	-/-	2	0		2	HF34876/HF17404
BP	GO:0043648	dicarboxylic acid metabolic process	2/684	17/11134	0.280961	0.999765	HF14442/HF18330	-/-	2	2	HF14442/HF18330	0
BP	GO:0046364	monosaccharide biosynthetic process	2/684	17/11134	0.280961	0.999765	HF34876/HF17404	-/-	2	0		2	HF34876/HF17404
BP	GO:0000278	mitotic cell cycle	2/684	18/11134	0.304244	0.999765	HF04285/HF30340	-/-	2	0		2	HF04285/HF30340
BP	GO:0000280	nuclear division	2/684	18/11134	0.304244	0.999765	HF04285/HF30340	-/-	2	0		2	HF04285/HF30340
BP	GO:0009067	aspartate family amino acid biosynthetic process	2/684	18/11134	0.304244	0.999765	HF14442/HF18330	-/-	2	2	HF14442/HF18330	0
BP	GO:0046836	glycolipid transport	2/684	18/11134	0.304244	0.999765	HF09911/HF43813	-/-	2	1	HF43813	1	HF09911
BP	GO:0098813	nuclear chromosome segregation	2/684	18/11134	0.304244	0.999765	HF04285/HF30340	-/-	2	0		2	HF04285/HF30340
BP	GO:1901264	carbohydrate derivative transport	2/684	18/11134	0.304244	0.999765	HF09911/HF43813	-/-	2	1	HF43813	1	HF09911
BP	GO:1903047	mitotic cell cycle process	2/684	18/11134	0.304244	0.999765	HF04285/HF30340	-/-	2	0		2	HF04285/HF30340
BP	GO:0006073	cellular glucan metabolic process	7/684	89/11134	0.30575	0.999765	HF39844/HF16213/HF02449/HF39842/HF00861/HF41526/HF27258	-/-/-/-/-/-/-	7	5	HF16213/HF02449/HF00861/HF41526/HF27258	2	HF39844/HF39842
BP	GO:0044042	glucan metabolic process	7/684	89/11134	0.30575	0.999765	HF39844/HF16213/HF02449/HF39842/HF00861/HF41526/HF27258	-/-/-/-/-/-/-	7	5	HF16213/HF02449/HF00861/HF41526/HF27258	2	HF39844/HF39842
BP	GO:0044264	cellular polysaccharide metabolic process	7/684	89/11134	0.30575	0.999765	HF39844/HF16213/HF02449/HF39842/HF00861/HF41526/HF27258	-/-/-/-/-/-/-	7	5	HF16213/HF02449/HF00861/HF41526/HF27258	2	HF39844/HF39842
BP	GO:0006869	lipid transport	2/684	19/11134	0.327384	0.999765	HF09911/HF43813	-/-	2	1	HF43813	1	HF09911
BP	GO:0005985	sucrose metabolic process	2/684	20/11134	0.350312	0.999765	HF30851/HF36979	-/-	2	1	HF36979	1	HF30851
BP	GO:0006801	superoxide metabolic process	2/684	21/11134	0.372965	0.999765	novel.3281/HF41931	-/-	2	0		2	novel.3281/HF41931
BP	GO:0009066	aspartate family amino acid metabolic process	2/684	21/11134	0.372965	0.999765	HF14442/HF18330	-/-	2	2	HF14442/HF18330	0
BP	GO:0009605	response to external stimulus	2/684	21/11134	0.372965	0.999765	HF32028/HF34505	-/-	2	2	HF32028/HF34505	0
BP	GO:0072593	reactive oxygen species metabolic process	2/684	21/11134	0.372965	0.999765	novel.3281/HF41931	-/-	2	0		2	novel.3281/HF41931
BP	GO:0010876	lipid localization	2/684	22/11134	0.395291	0.999765	HF09911/HF43813	-/-	2	1	HF43813	1	HF09911
BP	GO:0006366	transcription by RNA polymerase II	3/684	37/11134	0.399155	0.999765	HF39656/HF20528/HF24770	-/-/-	3	1	HF39656	2	HF20528/HF24770
BP	GO:0048583	regulation of response to stimulus	2/684	23/11134	0.417244	0.999765	HF32028/HF34505	-/-	2	2	HF32028/HF34505	0
BP	GO:0006629	lipid metabolic process	27/684	418/11134	0.42166	0.999765	HF26931/HF06626/novel.278/HF41626/HF34528/HF32922/novel.551/HF40113/HF33778/HF27754/HF02462/HF32379/HF25881/HF33172/HF23957/HF29324/HF27454/HF37260/HF08475/HF34327/HF33180/HF22428/HF40115/HF18756/HF32382/HF32368/HF08593	-/-/-/-/-/-/-/-/-/-/-/-/-/-/-/-/-/-/-/-/-/-/-/-/-/-/-	27	14	HF41626/HF32922/novel.551/HF33778/HF25881/HF23957/HF29324/HF27454/HF37260/HF08475/HF34327/HF22428/HF40115/HF18756	13	HF26931/HF06626/novel.278/HF34528/HF40113/HF27754/HF02462/HF32379/HF33172/HF33180/HF32382/HF32368/HF08593
BP	GO:0009057	macromolecule catabolic process	13/684	196/11134	0.428807	0.999765	HF04141/HF19575/HF30940/HF13132/HF17970/HF04121/HF24655/HF04116/HF37337/HF26660/HF19224/HF30340/novel.2945	-/-/-/-/-/-/-/-/-/-/-/-/-	13	6	HF30940/HF13132/HF17970/HF24655/HF26660/novel.2945	7	HF04141/HF19575/HF04121/HF04116/HF37337/HF19224/HF30340
BP	GO:0022402	cell cycle process	3/684	39/11134	0.432634	0.999765	HF04741/HF04285/HF30340	-/-/-	3	0		3	HF04741/HF04285/HF30340
BP	GO:0048285	organelle fission	2/684	24/11134	0.438787	0.999765	HF04285/HF30340	-/-	2	0		2	HF04285/HF30340
BP	GO:1901136	carbohydrate derivative catabolic process	2/684	24/11134	0.438787	0.999765	HF30940/HF19224	-/-	2	1	HF30940	1	HF19224
BP	GO:0006633	fatty acid biosynthetic process	5/684	72/11134	0.45604	0.999765	HF26931/novel.278/HF25881/HF08475/HF22428	-/-/-/-/-	5	3	HF25881/HF08475/HF22428	2	HF26931/novel.278
BP	GO:0006383	transcription by RNA polymerase III	1/684	10/11134	0.469683	0.999765	HF30786	-	1	1	HF30786	0
BP	GO:0009890	negative regulation of biosynthetic process	1/684	10/11134	0.469683	0.999765	HF08439	-	1	1	HF08439	0
BP	GO:0010558	negative regulation of macromolecule biosynthetic process	1/684	10/11134	0.469683	0.999765	HF08439	-	1	1	HF08439	0
BP	GO:0022618	ribonucleoprotein complex assembly	1/684	10/11134	0.469683	0.999765	novel.1238	-	1	1	novel.1238	0
BP	GO:0031324	negative regulation of cellular metabolic process	1/684	10/11134	0.469683	0.999765	HF08439	-	1	1	HF08439	0
BP	GO:0031327	negative regulation of cellular biosynthetic process	1/684	10/11134	0.469683	0.999765	HF08439	-	1	1	HF08439	0
BP	GO:0042816	vitamin B6 metabolic process	1/684	10/11134	0.469683	0.999765	HF14104	-	1	0		1	HF14104
BP	GO:0042819	vitamin B6 biosynthetic process	1/684	10/11134	0.469683	0.999765	HF14104	-	1	0		1	HF14104
BP	GO:0042822	pyridoxal phosphate metabolic process	1/684	10/11134	0.469683	0.999765	HF14104	-	1	0		1	HF14104
BP	GO:0042823	pyridoxal phosphate biosynthetic process	1/684	10/11134	0.469683	0.999765	HF14104	-	1	0		1	HF14104
BP	GO:0046184	aldehyde biosynthetic process	1/684	10/11134	0.469683	0.999765	HF14104	-	1	0		1	HF14104
BP	GO:0051172	negative regulation of nitrogen compound metabolic process	1/684	10/11134	0.469683	0.999765	HF08439	-	1	1	HF08439	0
BP	GO:0071826	ribonucleoprotein complex subunit organization	1/684	10/11134	0.469683	0.999765	novel.1238	-	1	1	novel.1238	0
BP	GO:2000113	negative regulation of cellular macromolecule biosynthetic process	1/684	10/11134	0.469683	0.999765	HF08439	-	1	1	HF08439	0
BP	GO:0007346	regulation of mitotic cell cycle	1/684	11/11134	0.502291	0.999765	HF30340	-	1	0		1	HF30340
BP	GO:0010564	regulation of cell cycle process	1/684	11/11134	0.502291	0.999765	HF30340	-	1	0		1	HF30340
BP	GO:0043631	RNA polyadenylation	1/684	11/11134	0.502291	0.999765	HF32196	-	1	1	HF32196	0
BP	GO:0046486	glycerolipid metabolic process	5/684	76/11134	0.503974	0.999765	HF41626/HF32379/HF18756/HF32382/HF32368	-/-/-/-/-	5	2	HF41626/HF18756	3	HF32379/HF32382/HF32368
BP	GO:0044262	cellular carbohydrate metabolic process	9/684	142/11134	0.511108	0.999765	HF39844/HF16213/HF30851/HF02449/HF39842/HF00861/HF36979/HF41526/HF27258	-/-/-/-/-/-/-/-/-	9	6	HF16213/HF02449/HF00861/HF36979/HF41526/HF27258	3	HF39844/HF30851/HF39842
BP	GO:0030243	cellulose metabolic process	3/684	44/11134	0.512908	0.999765	HF39844/HF39842/HF41526	-/-/-	3	1	HF41526	2	HF39844/HF39842
BP	GO:0030244	cellulose biosynthetic process	3/684	44/11134	0.512908	0.999765	HF39844/HF39842/HF41526	-/-/-	3	1	HF41526	2	HF39844/HF39842
BP	GO:0048523	negative regulation of cellular process	2/684	28/11134	0.520281	0.999765	HF04741/HF08439	-/-	2	1	HF08439	1	HF04741
BP	GO:0006643	membrane lipid metabolic process	3/684	45/11134	0.528239	0.999765	HF41626/HF34528/HF18756	-/-/-	3	2	HF41626/HF18756	1	HF34528
BP	GO:0006367	transcription initiation from RNA polymerase II promoter	1/684	12/11134	0.532897	0.999765	HF39656	-	1	1	HF39656	0
BP	GO:0006541	glutamine metabolic process	1/684	12/11134	0.532897	0.999765	HF01484	-	1	0		1	HF01484
BP	GO:0009690	cytokinin metabolic process	1/684	12/11134	0.532897	0.999765	HF30727	-	1	1	HF30727	0
BP	GO:0010817	regulation of hormone levels	1/684	12/11134	0.532897	0.999765	HF30727	-	1	1	HF30727	0
BP	GO:0015696	ammonium transport	1/684	12/11134	0.532897	0.999765	HF15502	-	1	1	HF15502	0
BP	GO:0034754	cellular hormone metabolic process	1/684	12/11134	0.532897	0.999765	HF30727	-	1	1	HF30727	0
BP	GO:0042445	hormone metabolic process	1/684	12/11134	0.532897	0.999765	HF30727	-	1	1	HF30727	0
BP	GO:0006497	protein lipidation	2/684	29/11134	0.539385	0.999765	HF41626/HF18756	-/-	2	2	HF41626/HF18756	0
BP	GO:0006506	GPI anchor biosynthetic process	2/684	29/11134	0.539385	0.999765	HF41626/HF18756	-/-	2	2	HF41626/HF18756	0
BP	GO:0006661	phosphatidylinositol biosynthetic process	2/684	29/11134	0.539385	0.999765	HF41626/HF18756	-/-	2	2	HF41626/HF18756	0
BP	GO:0006766	vitamin metabolic process	2/684	29/11134	0.539385	0.999765	HF14104/HF10899	-/-	2	0		2	HF14104/HF10899
BP	GO:0006767	water-soluble vitamin metabolic process	2/684	29/11134	0.539385	0.999765	HF14104/HF10899	-/-	2	0		2	HF14104/HF10899
BP	GO:0009110	vitamin biosynthetic process	2/684	29/11134	0.539385	0.999765	HF14104/HF10899	-/-	2	0		2	HF14104/HF10899
BP	GO:0042157	lipoprotein metabolic process	2/684	29/11134	0.539385	0.999765	HF41626/HF18756	-/-	2	2	HF41626/HF18756	0
BP	GO:0042158	lipoprotein biosynthetic process	2/684	29/11134	0.539385	0.999765	HF41626/HF18756	-/-	2	2	HF41626/HF18756	0
BP	GO:0042364	water-soluble vitamin biosynthetic process	2/684	29/11134	0.539385	0.999765	HF14104/HF10899	-/-	2	0		2	HF14104/HF10899
BP	GO:0015936	coenzyme A metabolic process	1/684	13/11134	0.561624	0.999765	HF42602	-	1	0		1	HF42602
BP	GO:0045786	negative regulation of cell cycle	1/684	13/11134	0.561624	0.999765	HF04741	-	1	0		1	HF04741
BP	GO:0051276	chromosome organization	7/684	115/11134	0.565703	0.999765	HF32864/novel.3057/HF32277/HF24770/HF27204/HF04285/HF30340	-/-/-/-/-/-/-	7	3	HF32864/novel.3057/HF32277	4	HF24770/HF27204/HF04285/HF30340
BP	GO:0006505	GPI anchor metabolic process	2/684	31/11134	0.575989	0.999765	HF41626/HF18756	-/-	2	2	HF41626/HF18756	0
BP	GO:0010629	negative regulation of gene expression	2/684	31/11134	0.575989	0.999765	HF32519/HF08439	-/-	2	2	HF32519/HF08439	0
BP	GO:0046474	glycerophospholipid biosynthetic process	2/684	31/11134	0.575989	0.999765	HF41626/HF18756	-/-	2	2	HF41626/HF18756	0
BP	GO:0042592	homeostatic process	9/684	151/11134	0.586442	0.999765	HF32301/HF37818/HF02841/novel.3057/HF02163/HF27683/novel.2667/HF17837/HF18049	-/-/-/-/-/-/-/-/-	9	5	HF37818/HF02841/novel.3057/HF02163/HF18049	4	HF32301/HF27683/novel.2667/HF17837
BP	GO:0006721	terpenoid metabolic process	1/684	14/11134	0.588587	0.999765	novel.551	-	1	1	novel.551	0
BP	GO:0016114	terpenoid biosynthetic process	1/684	14/11134	0.588587	0.999765	novel.551	-	1	1	novel.551	0
BP	GO:0046148	pigment biosynthetic process	1/684	14/11134	0.588587	0.999765	novel.551	-	1	1	novel.551	0
BP	GO:0009719	response to endogenous stimulus	6/684	101/11134	0.593395	0.999765	novel.917/HF19076/HF28531/HF02632/HF04880/HF26049	-/-/-/-/-/-	6	4	HF28531/HF02632/HF04880/HF26049	2	novel.917/HF19076
BP	GO:0009725	response to hormone	6/684	101/11134	0.593395	0.999765	novel.917/HF19076/HF28531/HF02632/HF04880/HF26049	-/-/-/-/-/-	6	4	HF28531/HF02632/HF04880/HF26049	2	novel.917/HF19076
BP	GO:0010033	response to organic substance	6/684	101/11134	0.593395	0.999765	novel.917/HF19076/HF28531/HF02632/HF04880/HF26049	-/-/-/-/-/-	6	4	HF28531/HF02632/HF04880/HF26049	2	novel.917/HF19076
BP	GO:0051726	regulation of cell cycle	2/684	32/11134	0.593478	0.999765	HF04741/HF30340	-/-	2	0		2	HF04741/HF30340
BP	GO:0009892	negative regulation of metabolic process	2/684	33/11134	0.610422	0.999765	HF32519/HF08439	-/-	2	2	HF32519/HF08439	0
BP	GO:0010605	negative regulation of macromolecule metabolic process	2/684	33/11134	0.610422	0.999765	HF32519/HF08439	-/-	2	2	HF32519/HF08439	0
BP	GO:0009084	glutamine family amino acid biosynthetic process	1/684	15/11134	0.613893	0.999765	HF01484	-	1	0		1	HF01484
BP	GO:0016458	gene silencing	1/684	15/11134	0.613893	0.999765	HF32519	-	1	1	HF32519	0
BP	GO:0031047	gene silencing by RNA	1/684	15/11134	0.613893	0.999765	HF32519	-	1	1	HF32519	0
BP	GO:1901617	organic hydroxy compound biosynthetic process	1/684	15/11134	0.613893	0.999765	HF14104	-	1	0		1	HF14104
BP	GO:0048519	negative regulation of biological process	3/684	51/11134	0.614198	0.999765	HF32519/HF04741/HF08439	-/-/-	3	2	HF32519/HF08439	1	HF04741
BP	GO:0006631	fatty acid metabolic process	5/684	87/11134	0.625561	0.999765	HF26931/novel.278/HF25881/HF08475/HF22428	-/-/-/-/-	5	3	HF25881/HF08475/HF22428	2	HF26931/novel.278
BP	GO:0006333	chromatin assembly or disassembly	2/684	34/11134	0.626822	0.999765	HF32864/HF32277	-/-	2	2	HF32864/HF32277	0
BP	GO:0006508	proteolysis	27/684	460/11134	0.627469	0.999765	HF41921/HF25263/HF19575/HF25262/HF11750/HF05167/HF08133/novel.3483/novel.1289/HF08279/HF43512/HF33184/HF40233/HF27222/HF34585/HF33393/HF38817/HF40234/novel.1856/HF25266/novel.825/HF25267/HF06213/novel.2097/HF25341/HF30340/HF15738	-/-/-/-/-/-/-/-/-/-/-/-/-/-/-/-/-/-/-/-/-/-/-/-/-/-/-	27	12	HF41921/HF25263/HF25262/HF05167/novel.3483/novel.1289/HF43512/HF33184/HF40234/HF25266/novel.2097/HF15738	15	HF19575/HF11750/HF08133/HF08279/HF40233/HF27222/HF34585/HF33393/HF38817/novel.1856/novel.825/HF25267/HF06213/HF25341/HF30340
BP	GO:0007049	cell cycle	4/684	71/11134	0.642236	0.999765	HF40614/HF04741/HF04285/HF30340	-/-/-/-	4	1	HF40614	3	HF04741/HF04285/HF30340
BP	GO:0009308	amine metabolic process	2/684	35/11134	0.64268	0.999765	HF06541/HF30727	-/-	2	1	HF30727	1	HF06541
BP	GO:0030001	metal ion transport	12/684	210/11134	0.644817	0.999765	HF11571/HF39898/HF21234/HF33974/HF42571/HF19721/HF08487/HF39902/HF03283/HF25617/HF39802/HF04181	-/-/-/-/-/-/-/-/-/-/-/-	12	4	HF21234/HF08487/HF25617/HF04181	8	HF11571/HF39898/HF33974/HF42571/HF19721/HF39902/HF03283/HF39802
BP	GO:0006323	DNA packaging	2/684	36/11134	0.658002	0.999765	HF32864/HF04285	-/-	2	1	HF32864	1	HF04285
BP	GO:0006298	mismatch repair	1/684	17/11134	0.659938	0.999765	HF28512	-	1	1	HF28512	0
BP	GO:0007005	mitochondrion organization	1/684	17/11134	0.659938	0.999765	HF19002	-	1	1	HF19002	0
BP	GO:0072330	monocarboxylic acid biosynthetic process	8/684	144/11134	0.666371	0.999765	HF26931/novel.278/HF12316/HF25881/HF08475/HF28597/HF22428/HF10899	-/-/-/-/-/-/-/-	8	4	HF12316/HF25881/HF08475/HF22428	4	HF26931/novel.278/HF28597/HF10899
BP	GO:0009247	glycolipid biosynthetic process	2/684	37/11134	0.672794	0.999765	HF41626/HF18756	-/-	2	2	HF41626/HF18756	0
BP	GO:0046467	membrane lipid biosynthetic process	2/684	37/11134	0.672794	0.999765	HF41626/HF18756	-/-	2	2	HF41626/HF18756	0
BP	GO:0006259	DNA metabolic process	16/684	284/11134	0.677335	0.999765	novel.1954/HF28471/novel.369/HF28467/novel.1225/novel.3057/novel.982/HF28512/novel.1283/novel.2342/HF27087/novel.3061/novel.343/novel.1912/novel.257/novel.1827	-/-/-/-/-/-/-/-/-/-/-/-/-/-/-/-	16	8	HF28471/novel.369/novel.3057/novel.982/HF28512/novel.1283/novel.2342/HF27087	8	novel.1954/HF28467/novel.1225/novel.3061/novel.343/novel.1912/novel.257/novel.1827
BP	GO:0016226	iron-sulfur cluster assembly	1/684	18/11134	0.680861	0.999765	HF04035	-	1	1	HF04035	0
BP	GO:0031163	metallo-sulfur cluster assembly	1/684	18/11134	0.680861	0.999765	HF04035	-	1	1	HF04035	0
BP	GO:0019725	cellular homeostasis	8/684	146/11134	0.681404	0.999765	HF32301/HF37818/HF02841/HF02163/HF27683/novel.2667/HF17837/HF18049	-/-/-/-/-/-/-/-	8	4	HF37818/HF02841/HF02163/HF18049	4	HF32301/HF27683/novel.2667/HF17837
BP	GO:0009064	glutamine family amino acid metabolic process	1/684	19/11134	0.700498	0.999765	HF01484	-	1	0		1	HF01484
BP	GO:0006664	glycolipid metabolic process	2/684	39/11134	0.700814	0.999765	HF41626/HF18756	-/-	2	2	HF41626/HF18756	0
BP	GO:1903509	liposaccharide metabolic process	2/684	39/11134	0.700814	0.999765	HF41626/HF18756	-/-	2	2	HF41626/HF18756	0
BP	GO:0071554	cell wall organization or biogenesis	5/684	96/11134	0.710462	0.999765	HF30940/HF07918/HF28911/HF19224/HF13495	-/-/-/-/-	5	1	HF30940	4	HF07918/HF28911/HF19224/HF13495
BP	GO:0032268	regulation of cellular protein metabolic process	1/684	20/11134	0.718929	0.999765	HF08439	-	1	1	HF08439	0
BP	GO:0033865	nucleoside bisphosphate metabolic process	1/684	20/11134	0.718929	0.999765	HF42602	-	1	0		1	HF42602
BP	GO:0033875	ribonucleoside bisphosphate metabolic process	1/684	20/11134	0.718929	0.999765	HF42602	-	1	0		1	HF42602
BP	GO:0034032	purine nucleoside bisphosphate metabolic process	1/684	20/11134	0.718929	0.999765	HF42602	-	1	0		1	HF42602
BP	GO:0000271	polysaccharide biosynthetic process	3/684	60/11134	0.722037	0.999765	HF39844/HF39842/HF41526	-/-/-	3	1	HF41526	2	HF39844/HF39842
BP	GO:0009250	glucan biosynthetic process	3/684	60/11134	0.722037	0.999765	HF39844/HF39842/HF41526	-/-/-	3	1	HF41526	2	HF39844/HF39842
BP	GO:0033692	cellular polysaccharide biosynthetic process	3/684	60/11134	0.722037	0.999765	HF39844/HF39842/HF41526	-/-/-	3	1	HF41526	2	HF39844/HF39842
BP	GO:0051273	beta-glucan metabolic process	3/684	60/11134	0.722037	0.999765	HF39844/HF39842/HF41526	-/-/-	3	1	HF41526	2	HF39844/HF39842
BP	GO:0051274	beta-glucan biosynthetic process	3/684	60/11134	0.722037	0.999765	HF39844/HF39842/HF41526	-/-/-	3	1	HF41526	2	HF39844/HF39842
BP	GO:0006352	DNA-templated transcription, initiation	2/684	41/11134	0.726813	0.999765	HF39656/HF09660	-/-	2	2	HF39656/HF09660	0
BP	GO:0006357	regulation of transcription by RNA polymerase II	1/684	21/11134	0.736227	0.999765	HF20528	-	1	0		1	HF20528
BP	GO:0006414	translational elongation	1/684	21/11134	0.736227	0.999765	HF14472	-	1	0		1	HF14472
BP	GO:0006835	dicarboxylic acid transport	1/684	21/11134	0.736227	0.999765	HF20877	-	1	1	HF20877	0
BP	GO:0015740	C4-dicarboxylate transport	1/684	21/11134	0.736227	0.999765	HF20877	-	1	1	HF20877	0
BP	GO:0015743	malate transport	1/684	21/11134	0.736227	0.999765	HF20877	-	1	1	HF20877	0
BP	GO:0042440	pigment metabolic process	1/684	21/11134	0.736227	0.999765	novel.551	-	1	1	novel.551	0
BP	GO:0008033	tRNA processing	3/684	62/11134	0.742524	0.999765	novel.449/novel.1645/novel.2831	-/-/-	3	2	novel.449/novel.2831	1	novel.1645
BP	GO:0042398	cellular modified amino acid biosynthetic process	1/684	22/11134	0.752462	0.999765	HF10899	-	1	0		1	HF10899
BP	GO:0042545	cell wall modification	3/684	64/11134	0.761792	0.999765	HF07918/HF28911/HF13495	-/-/-	3	0		3	HF07918/HF28911/HF13495
BP	GO:1901607	alpha-amino acid biosynthetic process	3/684	64/11134	0.761792	0.999765	HF01484/HF14442/HF18330	-/-/-	3	2	HF14442/HF18330	1	HF01484
BP	GO:0005984	disaccharide metabolic process	2/684	44/11134	0.762205	0.999765	HF30851/HF36979	-/-	2	1	HF36979	1	HF30851
BP	GO:0000375	RNA splicing, via transesterification reactions	1/684	23/11134	0.7677	0.999765	novel.1238	-	1	1	novel.1238	0
BP	GO:0000377	RNA splicing, via transesterification reactions with bulged adenosine as nucleophile	1/684	23/11134	0.7677	0.999765	novel.1238	-	1	1	novel.1238	0
BP	GO:0000398	mRNA splicing, via spliceosome	1/684	23/11134	0.7677	0.999765	novel.1238	-	1	1	novel.1238	0
BP	GO:0006612	protein targeting to membrane	1/684	23/11134	0.7677	0.999765	HF14792	-	1	0		1	HF14792
BP	GO:0006613	cotranslational protein targeting to membrane	1/684	23/11134	0.7677	0.999765	HF14792	-	1	0		1	HF14792
BP	GO:0006614	SRP-dependent cotranslational protein targeting to membrane	1/684	23/11134	0.7677	0.999765	HF14792	-	1	0		1	HF14792
BP	GO:0045047	protein targeting to ER	1/684	23/11134	0.7677	0.999765	HF14792	-	1	0		1	HF14792
BP	GO:0051246	regulation of protein metabolic process	1/684	23/11134	0.7677	0.999765	HF08439	-	1	1	HF08439	0
BP	GO:0072599	establishment of protein localization to endoplasmic reticulum	1/684	23/11134	0.7677	0.999765	HF14792	-	1	0		1	HF14792
BP	GO:0045454	cell redox homeostasis	7/684	141/11134	0.770948	0.999765	HF32301/HF02841/HF02163/HF27683/novel.2667/HF17837/HF18049	-/-/-/-/-/-/-	7	3	HF02841/HF02163/HF18049	4	HF32301/HF27683/novel.2667/HF17837
BP	GO:0065008	regulation of biological quality	10/684	196/11134	0.771822	0.999765	HF32301/HF37818/HF02841/novel.3057/HF02163/HF27683/novel.2667/HF30727/HF17837/HF18049	-/-/-/-/-/-/-/-/-/-	10	6	HF37818/HF02841/novel.3057/HF02163/HF30727/HF18049	4	HF32301/HF27683/novel.2667/HF17837
BP	GO:0034470	ncRNA processing	5/684	104/11134	0.773755	0.999765	HF25578/novel.449/novel.1645/HF25582/novel.2831	-/-/-/-/-	5	4	HF25578/novel.449/HF25582/novel.2831	1	novel.1645
BP	GO:0032787	monocarboxylic acid metabolic process	8/684	162/11134	0.785936	0.999765	HF26931/novel.278/HF12316/HF25881/HF08475/HF28597/HF22428/HF10899	-/-/-/-/-/-/-/-	8	4	HF12316/HF25881/HF08475/HF22428	4	HF26931/novel.278/HF28597/HF10899
BP	GO:0044255	cellular lipid metabolic process	12/684	235/11134	0.786184	0.999765	HF26931/novel.278/HF41626/HF34528/novel.551/HF32379/HF25881/HF08475/HF22428/HF18756/HF32382/HF32368	-/-/-/-/-/-/-/-/-/-/-/-	12	6	HF41626/novel.551/HF25881/HF08475/HF22428/HF18756	6	HF26931/novel.278/HF34528/HF32379/HF32382/HF32368
BP	GO:0009108	coenzyme biosynthetic process	6/684	125/11134	0.787825	0.999765	novel.1238/HF12316/HF14104/HF28597/HF10899/HF42602	-/-/-/-/-/-	6	2	novel.1238/HF12316	4	HF14104/HF28597/HF10899/HF42602
BP	GO:0006081	cellular aldehyde metabolic process	1/684	25/11134	0.795422	0.999765	HF14104	-	1	0		1	HF14104
BP	GO:0006575	cellular modified amino acid metabolic process	1/684	25/11134	0.795422	0.999765	HF10899	-	1	0		1	HF10899
BP	GO:0006888	ER to Golgi vesicle-mediated transport	1/684	25/11134	0.795422	0.999765	HF19265	-	1	1	HF19265	0
BP	GO:0006325	chromatin organization	3/684	69/11134	0.804864	0.999765	HF32864/HF32277/HF24770	-/-/-	3	2	HF32864/HF32277	1	HF24770
BP	GO:0016567	protein ubiquitination	4/684	90/11134	0.811595	0.999765	HF42782/HF36171/HF42005/HF43842	-/-/-/-	4	2	HF42782/HF36171	2	HF42005/HF43842
BP	GO:0048193	Golgi vesicle transport	2/684	49/11134	0.81237	0.999765	HF19787/HF19265	-/-	2	1	HF19265	1	HF19787
BP	GO:0072528	pyrimidine-containing compound biosynthetic process	1/684	27/11134	0.81984	0.999765	novel.1238	-	1	1	novel.1238	0
BP	GO:0008654	phospholipid biosynthetic process	2/684	50/11134	0.821192	0.999765	HF41626/HF18756	-/-	2	2	HF41626/HF18756	0
BP	GO:0009311	oligosaccharide metabolic process	2/684	50/11134	0.821192	0.999765	HF30851/HF36979	-/-	2	1	HF36979	1	HF30851
BP	GO:0032446	protein modification by small protein conjugation	4/684	92/11134	0.824871	0.999765	HF42782/HF36171/HF42005/HF43842	-/-/-/-	4	2	HF42782/HF36171	2	HF42005/HF43842
BP	GO:0015979	photosynthesis	3/684	72/11134	0.827424	0.999765	HF06997/HF13920/HF35703	-/-/-	3	0		3	HF06997/HF13920/HF35703
BP	GO:0071103	DNA conformation change	2/684	51/11134	0.829641	0.999765	HF32864/HF04285	-/-	2	1	HF32864	1	HF04285
BP	GO:0003333	amino acid transmembrane transport	1/684	28/11134	0.830934	0.999765	HF01213	-	1	1	HF01213	0
BP	GO:0006865	amino acid transport	1/684	28/11134	0.830934	0.999765	HF01213	-	1	1	HF01213	0
BP	GO:0016051	carbohydrate biosynthetic process	5/684	113/11134	0.831675	0.999765	HF39844/HF34876/HF17404/HF39842/HF41526	-/-/-/-/-	5	1	HF41526	4	HF39844/HF34876/HF17404/HF39842
BP	GO:0006334	nucleosome assembly	1/684	29/11134	0.841347	0.999765	HF32864	-	1	1	HF32864	0
BP	GO:0031497	chromatin assembly	1/684	29/11134	0.841347	0.999765	HF32864	-	1	1	HF32864	0
BP	GO:0034728	nucleosome organization	1/684	29/11134	0.841347	0.999765	HF32864	-	1	1	HF32864	0
BP	GO:0044272	sulfur compound biosynthetic process	1/684	30/11134	0.851119	0.999765	novel.1238	-	1	1	novel.1238	0
BP	GO:0015711	organic anion transport	2/684	54/11134	0.852869	0.999765	HF20877/HF01213	-/-	2	2	HF20877/HF01213	0
BP	GO:0015849	organic acid transport	2/684	54/11134	0.852869	0.999765	HF20877/HF01213	-/-	2	2	HF20877/HF01213	0
BP	GO:0046942	carboxylic acid transport	2/684	54/11134	0.852869	0.999765	HF20877/HF01213	-/-	2	2	HF20877/HF01213	0
BP	GO:1901575	organic substance catabolic process	15/684	307/11134	0.854635	0.999765	HF04141/HF19575/HF30940/HF13132/HF17970/HF12316/HF04121/HF24655/HF04116/HF37337/HF26660/HF28597/HF19224/HF30340/novel.2945	-/-/-/-/-/-/-/-/-/-/-/-/-/-/-	15	7	HF30940/HF13132/HF17970/HF12316/HF24655/HF26660/novel.2945	8	HF04141/HF19575/HF04121/HF04116/HF37337/HF28597/HF19224/HF30340
BP	GO:0071804	cellular potassium ion transport	1/684	31/11134	0.86029	0.999765	HF42571	-	1	0		1	HF42571
BP	GO:0071805	potassium ion transmembrane transport	1/684	31/11134	0.86029	0.999765	HF42571	-	1	0		1	HF42571
BP	GO:0016053	organic acid biosynthetic process	11/684	235/11134	0.862313	0.999765	HF01484/HF26931/novel.278/HF12316/HF25881/HF08475/HF28597/HF22428/HF10899/HF14442/HF18330	-/-/-/-/-/-/-/-/-/-/-	11	6	HF12316/HF25881/HF08475/HF22428/HF14442/HF18330	5	HF01484/HF26931/novel.278/HF28597/HF10899
BP	GO:0046394	carboxylic acid biosynthetic process	11/684	235/11134	0.862313	0.999765	HF01484/HF26931/novel.278/HF12316/HF25881/HF08475/HF28597/HF22428/HF10899/HF14442/HF18330	-/-/-/-/-/-/-/-/-/-/-	11	6	HF12316/HF25881/HF08475/HF22428/HF14442/HF18330	5	HF01484/HF26931/novel.278/HF28597/HF10899
BP	GO:0006091	generation of precursor metabolites and energy	4/684	99/11134	0.86536	0.999765	HF12316/HF28597/HF13920/HF35703	-/-/-/-	4	1	HF12316	3	HF28597/HF13920/HF35703
BP	GO:0008299	isoprenoid biosynthetic process	1/684	32/11134	0.868897	0.999765	novel.551	-	1	1	novel.551	0
BP	GO:0016569	covalent chromatin modification	1/684	32/11134	0.868897	0.999765	HF24770	-	1	0		1	HF24770
BP	GO:0016570	histone modification	1/684	32/11134	0.868897	0.999765	HF24770	-	1	0		1	HF24770
BP	GO:0033043	regulation of organelle organization	1/684	32/11134	0.868897	0.999765	HF30340	-	1	0		1	HF30340
BP	GO:0065004	protein-DNA complex assembly	1/684	32/11134	0.868897	0.999765	HF32864	-	1	1	HF32864	0
BP	GO:0070972	protein localization to endoplasmic reticulum	1/684	32/11134	0.868897	0.999765	HF14792	-	1	0		1	HF14792
BP	GO:0071824	protein-DNA complex subunit organization	1/684	32/11134	0.868897	0.999765	HF32864	-	1	1	HF32864	0
BP	GO:0072527	pyrimidine-containing compound metabolic process	1/684	32/11134	0.868897	0.999765	novel.1238	-	1	1	novel.1238	0
BP	GO:0044283	small molecule biosynthetic process	14/684	295/11134	0.874769	0.999765	HF01484/HF26931/novel.278/HF12316/HF34876/HF17404/HF25881/HF14104/HF08475/HF28597/HF22428/HF10899/HF14442/HF18330	-/-/-/-/-/-/-/-/-/-/-/-/-/-	14	6	HF12316/HF25881/HF08475/HF22428/HF14442/HF18330	8	HF01484/HF26931/novel.278/HF34876/HF17404/HF14104/HF28597/HF10899
BP	GO:1901605	alpha-amino acid metabolic process	3/684	80/11134	0.876935	0.999765	HF01484/HF14442/HF18330	-/-/-	3	2	HF14442/HF18330	1	HF01484
BP	GO:0008380	RNA splicing	1/684	33/11134	0.876974	0.999765	novel.1238	-	1	1	novel.1238	0
BP	GO:0098656	anion transmembrane transport	1/684	33/11134	0.876974	0.999765	HF01213	-	1	1	HF01213	0
BP	GO:1903825	organic acid transmembrane transport	1/684	33/11134	0.876974	0.999765	HF01213	-	1	1	HF01213	0
BP	GO:1905039	carboxylic acid transmembrane transport	1/684	33/11134	0.876974	0.999765	HF01213	-	1	1	HF01213	0
BP	GO:0006996	organelle organization	9/684	202/11134	0.880112	0.999765	HF32864/novel.3057/HF32277/HF24770/HF12369/HF27204/HF04285/HF30340/HF19002	-/-/-/-/-/-/-/-/-	9	5	HF32864/novel.3057/HF32277/HF12369/HF19002	4	HF24770/HF27204/HF04285/HF30340
BP	GO:0045229	external encapsulating structure organization	3/684	81/11134	0.882145	0.999765	HF07918/HF28911/HF13495	-/-/-	3	0		3	HF07918/HF28911/HF13495
BP	GO:0071555	cell wall organization	3/684	81/11134	0.882145	0.999765	HF07918/HF28911/HF13495	-/-/-	3	0		3	HF07918/HF28911/HF13495
BP	GO:0006605	protein targeting	1/684	34/11134	0.884554	0.999765	HF14792	-	1	0		1	HF14792
BP	GO:0006720	isoprenoid metabolic process	1/684	34/11134	0.884554	0.999765	novel.551	-	1	1	novel.551	0
BP	GO:0007275	multicellular organism development	1/684	34/11134	0.884554	0.999765	HF35094	-	1	1	HF35094	0
BP	GO:0032502	developmental process	1/684	34/11134	0.884554	0.999765	HF35094	-	1	1	HF35094	0
BP	GO:0048856	anatomical structure development	1/684	34/11134	0.884554	0.999765	HF35094	-	1	1	HF35094	0
BP	GO:0008652	cellular amino acid biosynthetic process	3/684	82/11134	0.887158	0.999765	HF01484/HF14442/HF18330	-/-/-	3	2	HF14442/HF18330	1	HF01484
BP	GO:0051188	cofactor biosynthetic process	6/684	145/11134	0.887886	0.999765	novel.1238/HF12316/HF14104/HF28597/HF10899/HF42602	-/-/-/-/-/-	6	2	novel.1238/HF12316	4	HF14104/HF28597/HF10899/HF42602
BP	GO:0007264	small GTPase mediated signal transduction	5/684	125/11134	0.889504	0.999765	HF25107/HF22590/HF07296/novel.1149/HF07298	-/-/-/-/-	5	2	HF22590/novel.1149	3	HF25107/HF07296/HF07298
BP	GO:0009056	catabolic process	15/684	319/11134	0.889653	0.999765	HF04141/HF19575/HF30940/HF13132/HF17970/HF12316/HF04121/HF24655/HF04116/HF37337/HF26660/HF28597/HF19224/HF30340/novel.2945	-/-/-/-/-/-/-/-/-/-/-/-/-/-/-	15	7	HF30940/HF13132/HF17970/HF12316/HF24655/HF26660/novel.2945	8	HF04141/HF19575/HF04121/HF04116/HF37337/HF28597/HF19224/HF30340
BP	GO:0006396	RNA processing	11/684	244/11134	0.891264	0.999765	novel.1238/HF25578/HF32196/HF20235/HF01716/novel.449/HF26691/novel.1645/HF25582/novel.2831/HF25051	-/-/-/-/-/-/-/-/-/-/-	11	6	novel.1238/HF25578/HF32196/novel.449/HF25582/novel.2831	5	HF20235/HF01716/HF26691/novel.1645/HF25051
BP	GO:0006732	coenzyme metabolic process	6/684	146/11134	0.891618	0.999765	novel.1238/HF12316/HF14104/HF28597/HF10899/HF42602	-/-/-/-/-/-	6	2	novel.1238/HF12316	4	HF14104/HF28597/HF10899/HF42602
BP	GO:0006813	potassium ion transport	1/684	35/11134	0.891668	0.999765	HF42571	-	1	0		1	HF42571
BP	GO:1901615	organic hydroxy compound metabolic process	1/684	35/11134	0.891668	0.999765	HF14104	-	1	0		1	HF14104
BP	GO:0072525	pyridine-containing compound biosynthetic process	3/684	83/11134	0.89198	0.999765	HF12316/HF14104/HF28597	-/-/-	3	1	HF12316	2	HF14104/HF28597
BP	GO:0006928	movement of cell or subcellular component	4/684	106/11134	0.897552	0.999765	HF16401/HF38275/HF19401/HF05088	-/-/-/-	4	1	HF05088	3	HF16401/HF38275/HF19401
BP	GO:0007018	microtubule-based movement	4/684	106/11134	0.897552	0.999765	HF16401/HF38275/HF19401/HF05088	-/-/-/-	4	1	HF05088	3	HF16401/HF38275/HF19401
BP	GO:0006096	glycolytic process	2/684	62/11134	0.901367	0.999765	HF12316/HF28597	-/-	2	1	HF12316	1	HF28597
BP	GO:0006757	ATP generation from ADP	2/684	62/11134	0.901367	0.999765	HF12316/HF28597	-/-	2	1	HF12316	1	HF28597
BP	GO:0009135	purine nucleoside diphosphate metabolic process	2/684	62/11134	0.901367	0.999765	HF12316/HF28597	-/-	2	1	HF12316	1	HF28597
BP	GO:0009179	purine ribonucleoside diphosphate metabolic process	2/684	62/11134	0.901367	0.999765	HF12316/HF28597	-/-	2	1	HF12316	1	HF28597
BP	GO:0009185	ribonucleoside diphosphate metabolic process	2/684	62/11134	0.901367	0.999765	HF12316/HF28597	-/-	2	1	HF12316	1	HF28597
BP	GO:0042866	pyruvate biosynthetic process	2/684	62/11134	0.901367	0.999765	HF12316/HF28597	-/-	2	1	HF12316	1	HF28597
BP	GO:0046031	ADP metabolic process	2/684	62/11134	0.901367	0.999765	HF12316/HF28597	-/-	2	1	HF12316	1	HF28597
BP	GO:0072657	protein localization to membrane	1/684	37/11134	0.90461	0.999765	HF14792	-	1	0		1	HF14792
BP	GO:0090150	establishment of protein localization to membrane	1/684	37/11134	0.90461	0.999765	HF14792	-	1	0		1	HF14792
BP	GO:0006790	sulfur compound metabolic process	2/684	63/11134	0.906254	0.999765	novel.1238/HF04035	-/-	2	2	novel.1238/HF04035	0
BP	GO:0006457	protein folding	6/684	151/11134	0.908727	0.999765	HF00881/HF25885/novel.3351/HF25354/HF42298/HF23507	-/-/-/-/-/-	6	4	HF00881/HF25885/novel.3351/HF23507	2	HF25354/HF42298
BP	GO:0006413	translational initiation	1/684	38/11134	0.91049	0.999765	HF04322	-	1	0		1	HF04322
BP	GO:0006090	pyruvate metabolic process	2/684	64/11134	0.910914	0.999765	HF12316/HF28597	-/-	2	1	HF12316	1	HF28597
BP	GO:0009166	nucleotide catabolic process	2/684	64/11134	0.910914	0.999765	HF12316/HF28597	-/-	2	1	HF12316	1	HF28597
BP	GO:1901292	nucleoside phosphate catabolic process	2/684	64/11134	0.910914	0.999765	HF12316/HF28597	-/-	2	1	HF12316	1	HF28597
BP	GO:0046488	phosphatidylinositol metabolic process	2/684	65/11134	0.915356	0.999765	HF41626/HF18756	-/-	2	2	HF41626/HF18756	0
BP	GO:0051128	regulation of cellular component organization	1/684	39/11134	0.916007	0.999765	HF30340	-	1	0		1	HF30340
BP	GO:0006260	DNA replication	3/684	90/11134	0.920857	0.999765	HF28471/HF28467/HF27087	-/-/-	3	2	HF28471/HF27087	1	HF28467
BP	GO:0034622	cellular protein-containing complex assembly	3/684	90/11134	0.920857	0.999765	novel.1238/HF32864/HF13920	-/-/-	3	2	novel.1238/HF32864	1	HF13920
BP	GO:0034637	cellular carbohydrate biosynthetic process	3/684	90/11134	0.920857	0.999765	HF39844/HF39842/HF41526	-/-/-	3	1	HF41526	2	HF39844/HF39842
BP	GO:0072594	establishment of protein localization to organelle	1/684	40/11134	0.921185	0.999765	HF14792	-	1	0		1	HF14792
BP	GO:0006650	glycerophospholipid metabolic process	2/684	67/11134	0.923624	0.999765	HF41626/HF18756	-/-	2	2	HF41626/HF18756	0
BP	GO:0006165	nucleoside diphosphate phosphorylation	2/684	68/11134	0.927467	0.999765	HF12316/HF28597	-/-	2	1	HF12316	1	HF28597
BP	GO:0046939	nucleotide phosphorylation	2/684	68/11134	0.927467	0.999765	HF12316/HF28597	-/-	2	1	HF12316	1	HF28597
BP	GO:0006397	mRNA processing	2/684	69/11134	0.931127	0.999765	novel.1238/HF20235	-/-	2	1	novel.1238	1	HF20235
BP	GO:0006164	purine nucleotide biosynthetic process	4/684	116/11134	0.931759	0.999765	HF12316/HF28597/HF05137/HF42602	-/-/-/-	4	1	HF12316	3	HF28597/HF05137/HF42602
BP	GO:0072524	pyridine-containing compound metabolic process	3/684	95/11134	0.936963	0.999765	HF12316/HF14104/HF28597	-/-/-	3	1	HF12316	2	HF14104/HF28597
BP	GO:0072522	purine-containing compound biosynthetic process	4/684	118/11134	0.937215	0.999765	HF12316/HF28597/HF05137/HF42602	-/-/-/-	4	1	HF12316	3	HF28597/HF05137/HF42602
BP	GO:0000160	phosphorelay signal transduction system	2/684	72/11134	0.941086	0.999765	HF09304/HF28327	-/-	2	1	HF28327	1	HF09304
BP	GO:0009132	nucleoside diphosphate metabolic process	2/684	72/11134	0.941086	0.999765	HF12316/HF28597	-/-	2	1	HF12316	1	HF28597
BP	GO:0007017	microtubule-based process	5/684	143/11134	0.944038	0.999765	HF16401/HF38275/novel.583/HF19401/HF05088	-/-/-/-/-	5	2	novel.583/HF05088	3	HF16401/HF38275/HF19401
BP	GO:0019359	nicotinamide nucleotide biosynthetic process	2/684	73/11134	0.94409	0.999765	HF12316/HF28597	-/-	2	1	HF12316	1	HF28597
BP	GO:0019363	pyridine nucleotide biosynthetic process	2/684	73/11134	0.94409	0.999765	HF12316/HF28597	-/-	2	1	HF12316	1	HF28597
BP	GO:0046434	organophosphate catabolic process	2/684	73/11134	0.94409	0.999765	HF12316/HF28597	-/-	2	1	HF12316	1	HF28597
BP	GO:0090407	organophosphate biosynthetic process	8/684	209/11134	0.948306	0.999765	HF41626/novel.1238/HF12316/HF14104/HF28597/HF05137/HF18756/HF42602	-/-/-/-/-/-/-/-	8	4	HF41626/novel.1238/HF12316/HF18756	4	HF14104/HF28597/HF05137/HF42602
BP	GO:0034404	nucleobase-containing small molecule biosynthetic process	2/684	75/11134	0.949667	0.999765	HF12316/HF28597	-/-	2	1	HF12316	1	HF28597
BP	GO:0065003	protein-containing complex assembly	3/684	101/11134	0.95228	0.999765	novel.1238/HF32864/HF13920	-/-/-	3	2	novel.1238/HF32864	1	HF13920
BP	GO:0006812	cation transport	15/684	353/11134	0.953527	0.999765	HF25447/HF11571/HF39898/HF39705/HF21234/HF33974/HF15502/HF42571/HF19721/HF08487/HF39902/HF03283/HF25617/HF39802/HF04181	-/-/-/-/-/-/-/-/-/-/-/-/-/-/-	15	6	HF25447/HF21234/HF15502/HF08487/HF25617/HF04181	9	HF11571/HF39898/HF39705/HF33974/HF42571/HF19721/HF39902/HF03283/HF39802
BP	GO:0035556	intracellular signal transduction	8/684	214/11134	0.956383	0.999765	HF25107/HF09304/HF22590/HF27151/HF07296/novel.1149/HF07298/HF28327	-/-/-/-/-/-/-/-	8	3	HF22590/novel.1149/HF28327	5	HF25107/HF09304/HF27151/HF07296/HF07298
BP	GO:0051186	cofactor metabolic process	7/684	194/11134	0.958147	0.999765	novel.1238/HF12316/HF14104/HF28597/HF10899/HF42602/HF04035	-/-/-/-/-/-/-	7	3	novel.1238/HF12316/HF04035	4	HF14104/HF28597/HF10899/HF42602
BP	GO:0000413	protein peptidyl-prolyl isomerization	1/684	50/11134	0.958302	0.999765	HF25354	-	1	0		1	HF25354
BP	GO:0018208	peptidyl-proline modification	1/684	50/11134	0.958302	0.999765	HF25354	-	1	0		1	HF25354
BP	GO:0033365	protein localization to organelle	1/684	50/11134	0.958302	0.999765	HF14792	-	1	0		1	HF14792
BP	GO:0016071	mRNA metabolic process	2/684	79/11134	0.95927	0.999765	novel.1238/HF20235	-/-	2	1	novel.1238	1	HF20235
BP	GO:0098655	cation transmembrane transport	3/684	105/11134	0.96048	0.999765	HF21234/HF42571/HF25617	-/-/-	3	2	HF21234/HF25617	1	HF42571
BP	GO:0098660	inorganic ion transmembrane transport	3/684	105/11134	0.96048	0.999765	HF21234/HF42571/HF25617	-/-/-	3	2	HF21234/HF25617	1	HF42571
BP	GO:0098662	inorganic cation transmembrane transport	3/684	105/11134	0.96048	0.999765	HF21234/HF42571/HF25617	-/-/-	3	2	HF21234/HF25617	1	HF42571
BP	GO:1901565	organonitrogen compound catabolic process	5/684	153/11134	0.962479	0.999765	HF19575/HF30940/HF24655/HF19224/HF30340	-/-/-/-/-	5	2	HF30940/HF24655	3	HF19575/HF19224/HF30340
BP	GO:0007010	cytoskeleton organization	1/684	52/11134	0.96329	0.999765	HF12369	-	1	1	HF12369	0
BP	GO:0034660	ncRNA metabolic process	7/684	198/11134	0.963805	0.999765	HF11614/HF11599/HF25578/novel.449/novel.1645/HF25582/novel.2831	-/-/-/-/-/-/-	7	4	HF25578/novel.449/HF25582/novel.2831	3	HF11614/HF11599/novel.1645
BP	GO:0006399	tRNA metabolic process	5/684	156/11134	0.96681	0.999765	HF11614/HF11599/novel.449/novel.1645/novel.2831	-/-/-/-/-	5	2	novel.449/novel.2831	3	HF11614/HF11599/novel.1645
BP	GO:0006520	cellular amino acid metabolic process	8/684	222/11134	0.966979	0.999765	HF01484/HF31643/HF16493/HF11614/novel.1001/HF11599/HF14442/HF18330	-/-/-/-/-/-/-/-	8	3	HF31643/HF14442/HF18330	5	HF01484/HF16493/HF11614/novel.1001/HF11599
BP	GO:0009152	purine ribonucleotide biosynthetic process	3/684	109/11134	0.967344	0.999765	HF12316/HF28597/HF42602	-/-/-	3	1	HF12316	2	HF28597/HF42602
BP	GO:0009260	ribonucleotide biosynthetic process	3/684	109/11134	0.967344	0.999765	HF12316/HF28597/HF42602	-/-/-	3	1	HF12316	2	HF28597/HF42602
BP	GO:0046390	ribose phosphate biosynthetic process	3/684	109/11134	0.967344	0.999765	HF12316/HF28597/HF42602	-/-/-	3	1	HF12316	2	HF28597/HF42602
BP	GO:0016043	cellular component organization	15/684	367/11134	0.968517	0.999765	novel.1238/HF32864/novel.3057/HF32277/HF24770/HF12369/HF27204/HF04285/HF07918/HF28911/HF13920/HF13495/HF30340/HF19002/HF04035	-/-/-/-/-/-/-/-/-/-/-/-/-/-/-	15	7	novel.1238/HF32864/novel.3057/HF32277/HF12369/HF19002/HF04035	8	HF24770/HF27204/HF04285/HF07918/HF28911/HF13920/HF13495/HF30340
BP	GO:0019362	pyridine nucleotide metabolic process	2/684	85/11134	0.970455	0.999765	HF12316/HF28597	-/-	2	1	HF12316	1	HF28597
BP	GO:0046496	nicotinamide nucleotide metabolic process	2/684	85/11134	0.970455	0.999765	HF12316/HF28597	-/-	2	1	HF12316	1	HF28597
BP	GO:0006644	phospholipid metabolic process	2/684	86/11134	0.972005	0.999765	HF41626/HF18756	-/-	2	2	HF41626/HF18756	0
BP	GO:0034655	nucleobase-containing compound catabolic process	2/684	87/11134	0.973476	0.999765	HF12316/HF28597	-/-	2	1	HF12316	1	HF28597
BP	GO:0006733	oxidoreduction coenzyme metabolic process	2/684	88/11134	0.974873	0.999765	HF12316/HF28597	-/-	2	1	HF12316	1	HF28597
BP	GO:0043933	protein-containing complex subunit organization	3/684	115/11134	0.975565	0.999765	novel.1238/HF32864/HF13920	-/-/-	3	2	novel.1238/HF32864	1	HF13920
BP	GO:0034220	ion transmembrane transport	4/684	140/11134	0.975862	0.999765	HF21234/HF42571/HF01213/HF25617	-/-/-/-	4	3	HF21234/HF01213/HF25617	1	HF42571
BP	GO:0009165	nucleotide biosynthetic process	4/684	141/11134	0.976924	0.999765	HF12316/HF28597/HF05137/HF42602	-/-/-/-	4	1	HF12316	3	HF28597/HF05137/HF42602
BP	GO:1901293	nucleoside phosphate biosynthetic process	4/684	141/11134	0.976924	0.999765	HF12316/HF28597/HF05137/HF42602	-/-/-/-	4	1	HF12316	3	HF28597/HF05137/HF42602
BP	GO:0006163	purine nucleotide metabolic process	4/684	142/11134	0.977942	0.999765	HF12316/HF28597/HF05137/HF42602	-/-/-/-	4	1	HF12316	3	HF28597/HF05137/HF42602
BP	GO:0006418	tRNA aminoacylation for protein translation	2/684	91/11134	0.978649	0.999765	HF11614/HF11599	-/-	2	0		2	HF11614/HF11599
BP	GO:0006754	ATP biosynthetic process	2/684	91/11134	0.978649	0.999765	HF12316/HF28597	-/-	2	1	HF12316	1	HF28597
BP	GO:0072521	purine-containing compound metabolic process	4/684	144/11134	0.979852	0.999765	HF12316/HF28597/HF05137/HF42602	-/-/-/-	4	1	HF12316	3	HF28597/HF05137/HF42602
BP	GO:0046700	heterocycle catabolic process	2/684	95/11134	0.98284	0.999765	HF12316/HF28597	-/-	2	1	HF12316	1	HF28597
BP	GO:0009127	purine nucleoside monophosphate biosynthetic process	2/684	96/11134	0.983755	0.999765	HF12316/HF28597	-/-	2	1	HF12316	1	HF28597
BP	GO:0009156	ribonucleoside monophosphate biosynthetic process	2/684	96/11134	0.983755	0.999765	HF12316/HF28597	-/-	2	1	HF12316	1	HF28597
BP	GO:0009168	purine ribonucleoside monophosphate biosynthetic process	2/684	96/11134	0.983755	0.999765	HF12316/HF28597	-/-	2	1	HF12316	1	HF28597
BP	GO:0043038	amino acid activation	2/684	96/11134	0.983755	0.999765	HF11614/HF11599	-/-	2	0		2	HF11614/HF11599
BP	GO:0043039	tRNA aminoacylation	2/684	96/11134	0.983755	0.999765	HF11614/HF11599	-/-	2	0		2	HF11614/HF11599
BP	GO:1901361	organic cyclic compound catabolic process	2/684	96/11134	0.983755	0.999765	HF12316/HF28597	-/-	2	1	HF12316	1	HF28597
BP	GO:0070647	protein modification by small protein conjugation or removal	4/684	149/11134	0.983969	0.999765	HF42782/HF36171/HF42005/HF43842	-/-/-/-	4	2	HF42782/HF36171	2	HF42005/HF43842
BP	GO:0006486	protein glycosylation	1/684	65/11134	0.983971	0.999765	HF07435	-	1	0		1	HF07435
BP	GO:0043413	macromolecule glycosylation	1/684	65/11134	0.983971	0.999765	HF07435	-	1	0		1	HF07435
BP	GO:0030163	protein catabolic process	3/684	124/11134	0.98431	0.999765	HF19575/HF24655/HF30340	-/-/-	3	1	HF24655	2	HF19575/HF30340
BP	GO:0009142	nucleoside triphosphate biosynthetic process	2/684	97/11134	0.984624	0.999765	HF12316/HF28597	-/-	2	1	HF12316	1	HF28597
BP	GO:0009145	purine nucleoside triphosphate biosynthetic process	2/684	97/11134	0.984624	0.999765	HF12316/HF28597	-/-	2	1	HF12316	1	HF28597
BP	GO:0009201	ribonucleoside triphosphate biosynthetic process	2/684	97/11134	0.984624	0.999765	HF12316/HF28597	-/-	2	1	HF12316	1	HF28597
BP	GO:0009206	purine ribonucleoside triphosphate biosynthetic process	2/684	97/11134	0.984624	0.999765	HF12316/HF28597	-/-	2	1	HF12316	1	HF28597
BP	GO:0019439	aromatic compound catabolic process	2/684	97/11134	0.984624	0.999765	HF12316/HF28597	-/-	2	1	HF12316	1	HF28597
BP	GO:0022607	cellular component assembly	4/684	151/11134	0.985381	0.999765	novel.1238/HF32864/HF13920/HF04035	-/-/-/-	4	3	novel.1238/HF32864/HF04035	1	HF13920
BP	GO:0009124	nucleoside monophosphate biosynthetic process	2/684	98/11134	0.985447	0.999765	HF12316/HF28597	-/-	2	1	HF12316	1	HF28597
BP	GO:0044270	cellular nitrogen compound catabolic process	2/684	98/11134	0.985447	0.999765	HF12316/HF28597	-/-	2	1	HF12316	1	HF28597
BP	GO:0017144	drug metabolic process	5/684	176/11134	0.985764	0.999765	HF30940/HF12316/HF14104/HF28597/HF19224	-/-/-/-/-	5	2	HF30940/HF12316	3	HF14104/HF28597/HF19224
BP	GO:0006281	DNA repair	2/684	100/11134	0.986966	0.999765	novel.3057/HF28512	-/-	2	2	novel.3057/HF28512	0
BP	GO:0019752	carboxylic acid metabolic process	16/684	422/11134	0.988766	0.999765	HF01484/HF26931/novel.278/HF31643/HF16493/HF11614/novel.1001/HF11599/HF12316/HF25881/HF08475/HF28597/HF22428/HF10899/HF14442/HF18330	-/-/-/-/-/-/-/-/-/-/-/-/-/-/-/-	16	7	HF31643/HF12316/HF25881/HF08475/HF22428/HF14442/HF18330	9	HF01484/HF26931/novel.278/HF16493/HF11614/novel.1001/HF11599/HF28597/HF10899
BP	GO:0006974	cellular response to DNA damage stimulus	2/684	103/11134	0.98896	0.999765	novel.3057/HF28512	-/-	2	2	novel.3057/HF28512	0
BP	GO:0033554	cellular response to stress	2/684	103/11134	0.98896	0.999765	novel.3057/HF28512	-/-	2	2	novel.3057/HF28512	0
BP	GO:0046034	ATP metabolic process	2/684	103/11134	0.98896	0.999765	HF12316/HF28597	-/-	2	1	HF12316	1	HF28597
BP	GO:0009100	glycoprotein metabolic process	1/684	71/11134	0.989069	0.999765	HF07435	-	1	0		1	HF07435
BP	GO:0009101	glycoprotein biosynthetic process	1/684	71/11134	0.989069	0.999765	HF07435	-	1	0		1	HF07435
BP	GO:0043436	oxoacid metabolic process	16/684	426/11134	0.990072	0.999765	HF01484/HF26931/novel.278/HF31643/HF16493/HF11614/novel.1001/HF11599/HF12316/HF25881/HF08475/HF28597/HF22428/HF10899/HF14442/HF18330	-/-/-/-/-/-/-/-/-/-/-/-/-/-/-/-	16	7	HF31643/HF12316/HF25881/HF08475/HF22428/HF14442/HF18330	9	HF01484/HF26931/novel.278/HF16493/HF11614/novel.1001/HF11599/HF28597/HF10899
BP	GO:0006082	organic acid metabolic process	16/684	427/11134	0.990376	0.999765	HF01484/HF26931/novel.278/HF31643/HF16493/HF11614/novel.1001/HF11599/HF12316/HF25881/HF08475/HF28597/HF22428/HF10899/HF14442/HF18330	-/-/-/-/-/-/-/-/-/-/-/-/-/-/-/-	16	7	HF31643/HF12316/HF25881/HF08475/HF22428/HF14442/HF18330	9	HF01484/HF26931/novel.278/HF16493/HF11614/novel.1001/HF11599/HF28597/HF10899
BP	GO:0070085	glycosylation	1/684	74/11134	0.990974	0.999765	HF07435	-	1	0		1	HF07435
BP	GO:0009150	purine ribonucleotide metabolic process	3/684	135/11134	0.990975	0.999765	HF12316/HF28597/HF42602	-/-/-	3	1	HF12316	2	HF28597/HF42602
BP	GO:0009259	ribonucleotide metabolic process	3/684	135/11134	0.990975	0.999765	HF12316/HF28597/HF42602	-/-/-	3	1	HF12316	2	HF28597/HF42602
BP	GO:0009126	purine nucleoside monophosphate metabolic process	2/684	108/11134	0.991642	0.999765	HF12316/HF28597	-/-	2	1	HF12316	1	HF28597
BP	GO:0009161	ribonucleoside monophosphate metabolic process	2/684	108/11134	0.991642	0.999765	HF12316/HF28597	-/-	2	1	HF12316	1	HF28597
BP	GO:0009167	purine ribonucleoside monophosphate metabolic process	2/684	108/11134	0.991642	0.999765	HF12316/HF28597	-/-	2	1	HF12316	1	HF28597
BP	GO:0071705	nitrogen compound transport	8/684	261/11134	0.992318	0.999765	novel.2754/HF09067/HF19265/HF14792/HF41384/HF15502/HF23181/HF01213	-/-/-/-/-/-/-/-	8	5	novel.2754/HF19265/HF15502/HF23181/HF01213	3	HF09067/HF14792/HF41384
BP	GO:0009123	nucleoside monophosphate metabolic process	2/684	110/11134	0.992526	0.999765	HF12316/HF28597	-/-	2	1	HF12316	1	HF28597
BP	GO:0009144	purine nucleoside triphosphate metabolic process	2/684	110/11134	0.992526	0.999765	HF12316/HF28597	-/-	2	1	HF12316	1	HF28597
BP	GO:0009199	ribonucleoside triphosphate metabolic process	2/684	110/11134	0.992526	0.999765	HF12316/HF28597	-/-	2	1	HF12316	1	HF28597
BP	GO:0009205	purine ribonucleoside triphosphate metabolic process	2/684	110/11134	0.992526	0.999765	HF12316/HF28597	-/-	2	1	HF12316	1	HF28597
BP	GO:0022613	ribonucleoprotein complex biogenesis	1/684	79/11134	0.993441	0.999765	novel.1238	-	1	1	novel.1238	0
BP	GO:0009141	nucleoside triphosphate metabolic process	2/684	113/11134	0.993683	0.999765	HF12316/HF28597	-/-	2	1	HF12316	1	HF28597
BP	GO:0016192	vesicle-mediated transport	6/684	219/11134	0.993729	0.999765	HF19787/novel.2754/HF19265/HF02368/HF28755/HF23181	-/-/-/-/-/-	6	4	novel.2754/HF19265/HF02368/HF23181	2	HF19787/HF28755
BP	GO:0018193	peptidyl-amino acid modification	1/684	82/11134	0.994585	0.999765	HF25354	-	1	0		1	HF25354
BP	GO:1901137	carbohydrate derivative biosynthetic process	6/684	224/11134	0.994952	0.999765	HF41626/HF12316/HF07435/HF28597/HF18756/HF42602	-/-/-/-/-/-	6	3	HF41626/HF12316/HF18756	3	HF07435/HF28597/HF42602
BP	GO:0044257	cellular protein catabolic process	2/684	117/11134	0.994957	0.999765	HF19575/HF30340	-/-	2	0		2	HF19575/HF30340
BP	GO:0051603	proteolysis involved in cellular protein catabolic process	2/684	117/11134	0.994957	0.999765	HF19575/HF30340	-/-	2	0		2	HF19575/HF30340
BP	GO:0019693	ribose phosphate metabolic process	3/684	147/11134	0.995125	0.999765	HF12316/HF28597/HF42602	-/-/-	3	1	HF12316	2	HF28597/HF42602
BP	GO:0071840	cellular component organization or biogenesis	15/684	438/11134	0.996622	0.999765	novel.1238/HF32864/novel.3057/HF32277/HF24770/HF12369/HF27204/HF04285/HF07918/HF28911/HF13920/HF13495/HF30340/HF19002/HF04035	-/-/-/-/-/-/-/-/-/-/-/-/-/-/-	15	7	novel.1238/HF32864/novel.3057/HF32277/HF12369/HF19002/HF04035	8	HF24770/HF27204/HF04285/HF07918/HF28911/HF13920/HF13495/HF30340
BP	GO:0009117	nucleotide metabolic process	4/684	184/11134	0.996984	0.999765	HF12316/HF28597/HF05137/HF42602	-/-/-/-	4	1	HF12316	3	HF28597/HF05137/HF42602
BP	GO:0046907	intracellular transport	4/684	187/11134	0.997399	0.999765	novel.2754/HF19265/HF14792/HF23181	-/-/-/-	4	3	novel.2754/HF19265/HF23181	1	HF14792
BP	GO:0051649	establishment of localization in cell	4/684	187/11134	0.997399	0.999765	novel.2754/HF19265/HF14792/HF23181	-/-/-/-	4	3	novel.2754/HF19265/HF23181	1	HF14792
BP	GO:0006753	nucleoside phosphate metabolic process	4/684	188/11134	0.997525	0.999765	HF12316/HF28597/HF05137/HF42602	-/-/-/-	4	1	HF12316	3	HF28597/HF05137/HF42602
BP	GO:0006511	ubiquitin-dependent protein catabolic process	1/684	97/11134	0.997924	0.999765	HF30340	-	1	0		1	HF30340
BP	GO:0019941	modification-dependent protein catabolic process	1/684	97/11134	0.997924	0.999765	HF30340	-	1	0		1	HF30340
BP	GO:0043632	modification-dependent macromolecule catabolic process	1/684	97/11134	0.997924	0.999765	HF30340	-	1	0		1	HF30340
BP	GO:0006886	intracellular protein transport	3/684	168/11134	0.998386	0.999765	HF19265/HF14792/HF23181	-/-/-	3	2	HF19265/HF23181	1	HF14792
BP	GO:0044265	cellular macromolecule catabolic process	2/684	138/11134	0.998478	0.999765	HF19575/HF30340	-/-	2	0		2	HF19575/HF30340
BP	GO:0044248	cellular catabolic process	6/684	252/11134	0.99856	0.999765	HF19575/HF30940/HF12316/HF28597/HF19224/HF30340	-/-/-/-/-/-	6	2	HF30940/HF12316	4	HF19575/HF28597/HF19224/HF30340
BP	GO:0071702	organic substance transport	8/684	302/11134	0.998574	0.999765	novel.2754/HF19265/HF09911/HF14792/HF23181/HF43813/HF20877/HF01213	-/-/-/-/-/-/-/-	8	6	novel.2754/HF19265/HF23181/HF43813/HF20877/HF01213	2	HF09911/HF14792
BP	GO:0033036	macromolecule localization	6/684	256/11134	0.998802	0.999765	novel.2754/HF19265/HF09911/HF14792/HF23181/HF43813	-/-/-/-/-/-	6	4	novel.2754/HF19265/HF23181/HF43813	2	HF09911/HF14792
BP	GO:0015672	monovalent inorganic cation transport	1/684	106/11134	0.998833	0.999765	HF42571	-	1	0		1	HF42571
BP	GO:0019637	organophosphate metabolic process	8/684	310/11134	0.998989	0.999765	HF41626/novel.1238/HF12316/HF14104/HF28597/HF05137/HF18756/HF42602	-/-/-/-/-/-/-/-	8	4	HF41626/novel.1238/HF12316/HF18756	4	HF14104/HF28597/HF05137/HF42602
BP	GO:1901135	carbohydrate derivative metabolic process	8/684	319/11134	0.999317	0.999765	HF41626/HF30940/HF12316/HF07435/HF28597/HF19224/HF18756/HF42602	-/-/-/-/-/-/-/-	8	4	HF41626/HF30940/HF12316/HF18756	4	HF07435/HF28597/HF19224/HF42602
BP	GO:0034613	cellular protein localization	3/684	186/11134	0.999388	0.999765	HF19265/HF14792/HF23181	-/-/-	3	2	HF19265/HF23181	1	HF14792
BP	GO:0070727	cellular macromolecule localization	3/684	186/11134	0.999388	0.999765	HF19265/HF14792/HF23181	-/-/-	3	2	HF19265/HF23181	1	HF14792
BP	GO:0015031	protein transport	4/684	218/11134	0.999458	0.999765	novel.2754/HF19265/HF14792/HF23181	-/-/-/-	4	3	novel.2754/HF19265/HF23181	1	HF14792
BP	GO:0015833	peptide transport	4/684	218/11134	0.999458	0.999765	novel.2754/HF19265/HF14792/HF23181	-/-/-/-	4	3	novel.2754/HF19265/HF23181	1	HF14792
BP	GO:0042886	amide transport	4/684	218/11134	0.999458	0.999765	novel.2754/HF19265/HF14792/HF23181	-/-/-/-	4	3	novel.2754/HF19265/HF23181	1	HF14792
BP	GO:0044085	cellular component biogenesis	4/684	222/11134	0.99956	0.999765	novel.1238/HF32864/HF13920/HF04035	-/-/-/-	4	3	novel.1238/HF32864/HF04035	1	HF13920
BP	GO:0051641	cellular localization	4/684	223/11134	0.999582	0.999765	novel.2754/HF19265/HF14792/HF23181	-/-/-/-	4	3	novel.2754/HF19265/HF23181	1	HF14792
BP	GO:0055086	nucleobase-containing small molecule metabolic process	4/684	223/11134	0.999582	0.999765	HF12316/HF28597/HF05137/HF42602	-/-/-/-	4	1	HF12316	3	HF28597/HF05137/HF42602
BP	GO:0045184	establishment of protein localization	4/684	227/11134	0.999661	0.999765	novel.2754/HF19265/HF14792/HF23181	-/-/-/-	4	3	novel.2754/HF19265/HF23181	1	HF14792
BP	GO:0008104	protein localization	4/684	234/11134	0.999765	0.999765	novel.2754/HF19265/HF14792/HF23181	-/-/-/-	4	3	novel.2754/HF19265/HF23181	1	HF14792
CC	GO:0048046	apoplast	4/180	29/4115	0.0357546	0.986171	HF16213/HF02449/HF00861/HF27258	-/-/-/-	4	4	HF16213/HF02449/HF00861/HF27258	0
CC	GO:0005576	extracellular region	5/180	44/4115	0.041353	0.986171	HF16213/HF33184/HF02449/HF00861/HF27258	-/-/-/-/-	5	5	HF16213/HF33184/HF02449/HF00861/HF27258	0
CC	GO:0000428	DNA-directed RNA polymerase complex	3/180	25/4115	0.0935717	0.986171	HF39656/HF24770/HF30786	-/-/-	3	2	HF39656/HF30786	1	HF24770
CC	GO:0030880	RNA polymerase complex	3/180	25/4115	0.0935717	0.986171	HF39656/HF24770/HF30786	-/-/-	3	2	HF39656/HF30786	1	HF24770
CC	GO:0055029	nuclear DNA-directed RNA polymerase complex	3/180	25/4115	0.0935717	0.986171	HF39656/HF24770/HF30786	-/-/-	3	2	HF39656/HF30786	1	HF24770
CC	GO:0005654	nucleoplasm	5/180	58/4115	0.107859	0.986171	HF39656/HF20528/HF24770/HF23815/HF30786	-/-/-/-/-	5	3	HF39656/HF23815/HF30786	2	HF20528/HF24770
CC	GO:0044451	nucleoplasm part	5/180	58/4115	0.107859	0.986171	HF39656/HF20528/HF24770/HF23815/HF30786	-/-/-/-/-	5	3	HF39656/HF23815/HF30786	2	HF20528/HF24770
CC	GO:0005618	cell wall	7/180	95/4115	0.120367	0.986171	HF16213/HF07918/HF28911/HF02449/HF00861/HF13495/HF27258	-/-/-/-/-/-/-	7	4	HF16213/HF02449/HF00861/HF27258	3	HF07918/HF28911/HF13495
CC	GO:0030312	external encapsulating structure	7/180	95/4115	0.120367	0.986171	HF16213/HF07918/HF28911/HF02449/HF00861/HF13495/HF27258	-/-/-/-/-/-/-	7	4	HF16213/HF02449/HF00861/HF27258	3	HF07918/HF28911/HF13495
CC	GO:0061695	transferase complex, transferring phosphorus-containing groups	3/180	28/4115	0.121405	0.986171	HF39656/HF24770/HF30786	-/-/-	3	2	HF39656/HF30786	1	HF24770
CC	GO:0031974	membrane-enclosed lumen	7/180	107/4115	0.186211	0.986171	HF32994/HF39656/HF20528/HF24770/HF23815/HF03283/HF30786	-/-/-/-/-/-/-	7	3	HF39656/HF23815/HF30786	4	HF32994/HF20528/HF24770/HF03283
CC	GO:0043233	organelle lumen	7/180	107/4115	0.186211	0.986171	HF32994/HF39656/HF20528/HF24770/HF23815/HF03283/HF30786	-/-/-/-/-/-/-	7	3	HF39656/HF23815/HF30786	4	HF32994/HF20528/HF24770/HF03283
CC	GO:0070013	intracellular organelle lumen	7/180	107/4115	0.186211	0.986171	HF32994/HF39656/HF20528/HF24770/HF23815/HF03283/HF30786	-/-/-/-/-/-/-	7	3	HF39656/HF23815/HF30786	4	HF32994/HF20528/HF24770/HF03283
CC	GO:0016591	DNA-directed RNA polymerase II, holoenzyme	2/180	19/4115	0.200792	0.986171	HF39656/HF24770	-/-	2	1	HF39656	1	HF24770
CC	GO:0031981	nuclear lumen	6/180	94/4115	0.227559	0.986171	HF32994/HF39656/HF20528/HF24770/HF23815/HF30786	-/-/-/-/-/-	6	3	HF39656/HF23815/HF30786	3	HF32994/HF20528/HF24770
CC	GO:0016592	mediator complex	2/180	21/4115	0.233464	0.986171	HF20528/HF23815	-/-	2	1	HF23815	1	HF20528
CC	GO:0044428	nuclear part	8/180	144/4115	0.293824	0.986171	novel.1238/HF32994/HF39656/HF20528/HF24770/HF23815/HF30340/HF30786	-/-/-/-/-/-/-/-	8	4	novel.1238/HF39656/HF23815/HF30786	4	HF32994/HF20528/HF24770/HF30340
CC	GO:0044815	DNA packaging complex	2/180	29/4115	0.364395	0.986171	HF32864/HF04285	-/-	2	1	HF32864	1	HF04285
CC	GO:0005829	cytosol	1/180	11/4115	0.388977	0.986171	HF40057	-	1	0		1	HF40057
CC	GO:0044445	cytosolic part	1/180	11/4115	0.388977	0.986171	HF40057	-	1	0		1	HF40057
CC	GO:0000152	nuclear ubiquitin ligase complex	1/180	12/4115	0.415776	0.986171	HF30340	-	1	0		1	HF30340
CC	GO:0000793	condensed chromosome	1/180	12/4115	0.415776	0.986171	HF04285	-	1	0		1	HF04285
CC	GO:0005680	anaphase-promoting complex	1/180	12/4115	0.415776	0.986171	HF30340	-	1	0		1	HF30340
CC	GO:0030126	COPI vesicle coat	1/180	12/4115	0.415776	0.986171	HF23181	-	1	1	HF23181	0
CC	GO:0030137	COPI-coated vesicle	1/180	12/4115	0.415776	0.986171	HF23181	-	1	1	HF23181	0
CC	GO:0030663	COPI-coated vesicle membrane	1/180	12/4115	0.415776	0.986171	HF23181	-	1	1	HF23181	0
CC	GO:0031461	cullin-RING ubiquitin ligase complex	1/180	12/4115	0.415776	0.986171	HF30340	-	1	0		1	HF30340
CC	GO:0005694	chromosome	5/180	97/4115	0.420028	0.986171	HF32994/HF32864/HF27204/HF04285/HF27087	-/-/-/-/-	5	2	HF32864/HF27087	3	HF32994/HF27204/HF04285
CC	GO:1990234	transferase complex	4/180	77/4115	0.437149	0.986171	HF39656/HF24770/HF30340/HF30786	-/-/-/-	4	2	HF39656/HF30786	2	HF24770/HF30340
CC	GO:0009654	photosystem II oxygen evolving complex	2/180	34/4115	0.442185	0.986171	HF06997/HF35703	-/-	2	0		2	HF06997/HF35703
CC	GO:0044798	nuclear transcription factor complex	1/180	14/4115	0.465918	0.986171	HF39656	-	1	1	HF39656	0
CC	GO:0090575	RNA polymerase II transcription factor complex	1/180	14/4115	0.465918	0.986171	HF39656	-	1	1	HF39656	0
CC	GO:0042651	thylakoid membrane	2/180	37/4115	0.486304	0.986171	HF06997/HF35703	-/-	2	0		2	HF06997/HF35703
CC	GO:0000151	ubiquitin ligase complex	1/180	15/4115	0.489359	0.986171	HF30340	-	1	0		1	HF30340
CC	GO:0019898	extrinsic component of membrane	2/180	38/4115	0.500526	0.986171	HF06997/HF35703	-/-	2	0		2	HF06997/HF35703
CC	GO:0005798	Golgi-associated vesicle	2/180	40/4115	0.528205	0.986171	HF19265/HF23181	-/-	2	2	HF19265/HF23181	0
CC	GO:0012506	vesicle membrane	2/180	40/4115	0.528205	0.986171	HF19265/HF23181	-/-	2	2	HF19265/HF23181	0
CC	GO:0030120	vesicle coat	2/180	40/4115	0.528205	0.986171	HF19265/HF23181	-/-	2	2	HF19265/HF23181	0
CC	GO:0030135	coated vesicle	2/180	40/4115	0.528205	0.986171	HF19265/HF23181	-/-	2	2	HF19265/HF23181	0
CC	GO:0030659	cytoplasmic vesicle membrane	2/180	40/4115	0.528205	0.986171	HF19265/HF23181	-/-	2	2	HF19265/HF23181	0
CC	GO:0030660	Golgi-associated vesicle membrane	2/180	40/4115	0.528205	0.986171	HF19265/HF23181	-/-	2	2	HF19265/HF23181	0
CC	GO:0030662	coated vesicle membrane	2/180	40/4115	0.528205	0.986171	HF19265/HF23181	-/-	2	2	HF19265/HF23181	0
CC	GO:0031410	cytoplasmic vesicle	2/180	40/4115	0.528205	0.986171	HF19265/HF23181	-/-	2	2	HF19265/HF23181	0
CC	GO:0031982	vesicle	2/180	40/4115	0.528205	0.986171	HF19265/HF23181	-/-	2	2	HF19265/HF23181	0
CC	GO:0044433	cytoplasmic vesicle part	2/180	40/4115	0.528205	0.986171	HF19265/HF23181	-/-	2	2	HF19265/HF23181	0
CC	GO:0097708	intracellular vesicle	2/180	40/4115	0.528205	0.986171	HF19265/HF23181	-/-	2	2	HF19265/HF23181	0
CC	GO:1990204	oxidoreductase complex	2/180	40/4115	0.528205	0.986171	HF06997/HF35703	-/-	2	0		2	HF06997/HF35703
CC	GO:0012507	ER to Golgi transport vesicle membrane	1/180	18/4115	0.55372	0.986171	HF19265	-	1	1	HF19265	0
CC	GO:0030127	COPII vesicle coat	1/180	18/4115	0.55372	0.986171	HF19265	-	1	1	HF19265	0
CC	GO:0030134	COPII-coated ER to Golgi transport vesicle	1/180	18/4115	0.55372	0.986171	HF19265	-	1	1	HF19265	0
CC	GO:0032040	small-subunit processome	1/180	18/4115	0.55372	0.986171	HF32225	-	1	0		1	HF32225
CC	GO:0009523	photosystem II	2/180	42/4115	0.554835	0.986171	HF06997/HF35703	-/-	2	0		2	HF06997/HF35703
CC	GO:0044427	chromosomal part	3/180	67/4115	0.567599	0.986171	HF32864/HF04285/HF27087	-/-/-	3	2	HF32864/HF27087	1	HF04285
CC	GO:0071944	cell periphery	7/180	168/4115	0.609036	0.986171	HF16213/HF07918/HF28911/HF02449/HF00861/HF13495/HF27258	-/-/-/-/-/-/-	7	4	HF16213/HF02449/HF00861/HF27258	3	HF07918/HF28911/HF13495
CC	GO:0000786	nucleosome	1/180	22/4115	0.627155	0.986171	HF32864	-	1	1	HF32864	0
CC	GO:0005667	transcription factor complex	1/180	22/4115	0.627155	0.986171	HF39656	-	1	1	HF39656	0
CC	GO:0030684	preribosome	1/180	22/4115	0.627155	0.986171	HF32225	-	1	0		1	HF32225
CC	GO:0000228	nuclear chromosome	1/180	23/4115	0.643552	0.986171	HF32994	-	1	0		1	HF32994
CC	GO:0032993	protein-DNA complex	1/180	24/4115	0.659231	0.986171	HF32864	-	1	1	HF32864	0
CC	GO:0005789	endoplasmic reticulum membrane	2/180	51/4115	0.661288	0.986171	HF14488/HF18756	-/-	2	1	HF18756	1	HF14488
CC	GO:0042175	nuclear outer membrane-endoplasmic reticulum membrane network	2/180	51/4115	0.661288	0.986171	HF14488/HF18756	-/-	2	1	HF18756	1	HF14488
CC	GO:0044432	endoplasmic reticulum part	2/180	51/4115	0.661288	0.986171	HF14488/HF18756	-/-	2	1	HF18756	1	HF14488
CC	GO:0098827	endoplasmic reticulum subcompartment	2/180	51/4115	0.661288	0.986171	HF14488/HF18756	-/-	2	1	HF18756	1	HF14488
CC	GO:0005875	microtubule associated complex	1/180	26/4115	0.688562	0.986171	novel.583	-	1	1	novel.583	0
CC	GO:0000785	chromatin	1/180	27/4115	0.702272	0.986171	HF32864	-	1	1	HF32864	0
CC	GO:0030133	transport vesicle	1/180	28/4115	0.715381	0.986171	HF19265	-	1	1	HF19265	0
CC	GO:0030658	transport vesicle membrane	1/180	28/4115	0.715381	0.986171	HF19265	-	1	1	HF19265	0
CC	GO:0005840	ribosome	16/180	410/4115	0.725712	0.986171	HF41626/HF22066/novel.3632/HF26615/HF06975/HF26952/HF11728/HF34001/HF43038/HF26427/HF24948/HF32959/HF43086/HF02468/HF02543/HF39809	-/-/-/-/-/-/-/-/-/-/-/-/-/-/-/-	16	9	HF41626/HF22066/HF26952/HF11728/HF34001/HF26427/HF24948/HF02543/HF39809	7	novel.3632/HF26615/HF06975/HF43038/HF32959/HF43086/HF02468
CC	GO:0030117	membrane coat	2/180	60/4115	0.746436	0.986171	HF19265/HF23181	-/-	2	2	HF19265/HF23181	0
CC	GO:0048475	coated membrane	2/180	60/4115	0.746436	0.986171	HF19265/HF23181	-/-	2	2	HF19265/HF23181	0
CC	GO:0009521	photosystem	2/180	61/4115	0.754673	0.986171	HF06997/HF35703	-/-	2	0		2	HF06997/HF35703
CC	GO:1990904	ribonucleoprotein complex	18/180	469/4115	0.761012	0.986171	HF41626/novel.1238/HF22066/novel.3632/HF26615/HF06975/HF26952/HF11728/HF34001/HF43038/HF26427/HF24948/HF32959/HF43086/HF02468/HF02543/HF39809/HF32225	-/-/-/-/-/-/-/-/-/-/-/-/-/-/-/-/-/-	18	10	HF41626/novel.1238/HF22066/HF26952/HF11728/HF34001/HF26427/HF24948/HF02543/HF39809	8	novel.3632/HF26615/HF06975/HF43038/HF32959/HF43086/HF02468/HF32225
CC	GO:0034357	photosynthetic membrane	2/180	64/4115	0.778018	0.986171	HF06997/HF35703	-/-	2	0		2	HF06997/HF35703
CC	GO:0009579	thylakoid	2/180	66/4115	0.792488	0.986171	HF06997/HF35703	-/-	2	0		2	HF06997/HF35703
CC	GO:0044436	thylakoid part	2/180	66/4115	0.792488	0.986171	HF06997/HF35703	-/-	2	0		2	HF06997/HF35703
CC	GO:0031984	organelle subcompartment	2/180	67/4115	0.799407	0.986171	HF14488/HF18756	-/-	2	1	HF18756	1	HF14488
CC	GO:0005839	proteasome core complex	1/180	37/4115	0.810314	0.986171	HF19575	-	1	0		1	HF19575
CC	GO:0015630	microtubule cytoskeleton	1/180	37/4115	0.810314	0.986171	novel.583	-	1	1	novel.583	0
CC	GO:0098805	whole membrane	2/180	74/4115	0.842383	0.986171	HF19265/HF23181	-/-	2	2	HF19265/HF23181	0
CC	GO:0044422	organelle part	17/180	474/4115	0.844389	0.986171	novel.1238/HF32994/HF39656/HF32864/HF14488/HF20528/HF19265/HF24770/novel.583/HF04285/HF27087/HF23181/HF23815/HF30340/HF03283/HF18756/HF30786	-/-/-/-/-/-/-/-/-/-/-/-/-/-/-/-/-	17	10	novel.1238/HF39656/HF32864/HF19265/novel.583/HF27087/HF23181/HF23815/HF18756/HF30786	7	HF32994/HF14488/HF20528/HF24770/HF04285/HF30340/HF03283
CC	GO:0044446	intracellular organelle part	17/180	474/4115	0.844389	0.986171	novel.1238/HF32994/HF39656/HF32864/HF14488/HF20528/HF19265/HF24770/novel.583/HF04285/HF27087/HF23181/HF23815/HF30340/HF03283/HF18756/HF30786	-/-/-/-/-/-/-/-/-/-/-/-/-/-/-/-/-	17	10	novel.1238/HF39656/HF32864/HF19265/novel.583/HF27087/HF23181/HF23815/HF18756/HF30786	7	HF32994/HF14488/HF20528/HF24770/HF04285/HF30340/HF03283
CC	GO:0000502	proteasome complex	1/180	42/4115	0.848658	0.986171	HF19575	-	1	0		1	HF19575
CC	GO:1905369	endopeptidase complex	1/180	42/4115	0.848658	0.986171	HF19575	-	1	0		1	HF19575
CC	GO:1902494	catalytic complex	7/180	223/4115	0.866485	0.986171	HF19575/HF39656/HF24770/HF06997/HF35703/HF30340/HF30786	-/-/-/-/-/-/-	7	2	HF39656/HF30786	5	HF19575/HF24770/HF06997/HF35703/HF30340
CC	GO:0012505	endomembrane system	5/180	171/4115	0.877435	0.986171	novel.2754/HF14488/HF19265/HF23181/HF18756	-/-/-/-/-	5	4	novel.2754/HF19265/HF23181/HF18756	1	HF14488
CC	GO:0005783	endoplasmic reticulum	2/180	83/4115	0.885381	0.986171	HF14488/HF18756	-/-	2	1	HF18756	1	HF14488
CC	GO:0005794	Golgi apparatus	1/180	51/4115	0.899281	0.986171	HF23181	-	1	1	HF23181	0
CC	GO:0044431	Golgi apparatus part	1/180	51/4115	0.899281	0.986171	HF23181	-	1	1	HF23181	0
CC	GO:0005739	mitochondrion	4/180	151/4115	0.904583	0.986171	HF41112/HF06765/HF28727/HF03283	-/-/-/-	4	2	HF06765/HF28727	2	HF41112/HF03283
CC	GO:1905368	peptidase complex	1/180	55/4115	0.91598	0.986171	HF19575	-	1	0		1	HF19575
CC	GO:0098588	bounding membrane of organelle	2/180	92/4115	0.917339	0.986171	HF19265/HF23181	-/-	2	2	HF19265/HF23181	0
CC	GO:0005740	mitochondrial envelope	1/180	64/4115	0.944158	0.986171	HF03283	-	1	0		1	HF03283
CC	GO:0044430	cytoskeletal part	1/180	73/4115	0.962921	0.986171	novel.583	-	1	1	novel.583	0
CC	GO:0044429	mitochondrial part	1/180	74/4115	0.964572	0.986171	HF03283	-	1	0		1	HF03283
CC	GO:0005856	cytoskeleton	1/180	75/4115	0.96615	0.986171	novel.583	-	1	1	novel.583	0
CC	GO:0031967	organelle envelope	1/180	78/4115	0.970477	0.986171	HF03283	-	1	0		1	HF03283
CC	GO:0031975	envelope	1/180	78/4115	0.970477	0.986171	HF03283	-	1	0		1	HF03283
CC	GO:0031090	organelle membrane	2/180	126/4115	0.977314	0.986171	HF19265/HF23181	-/-	2	2	HF19265/HF23181	0
CC	GO:0098796	membrane protein complex	5/180	246/4115	0.986171	0.986171	novel.2754/HF19265/HF06997/HF23181/HF35703	-/-/-/-/-	5	3	novel.2754/HF19265/HF23181	2	HF06997/HF35703
MF	GO:0005506	iron ion binding	47/963	339/16669	2.11253e-08	6.25308e-06	HF32232/HF32231/HF26931/HF24647/HF32233/novel.3075/novel.278/HF08054/HF39957/novel.1400/HF24656/HF42779/HF37818/novel.2976/novel.1315/HF32543/novel.576/HF29781/HF39985/novel.2251/HF42312/HF25881/novel.3097/HF23672/HF21572/HF08914/novel.3067/HF35281/HF40721/HF23544/HF16862/HF08475/HF04517/HF42775/HF42780/HF24645/novel.1398/HF19028/HF13390/novel.3490/HF13468/HF39986/HF29780/HF00377/HF21098/HF04035/…	-/-/-/-/-/-/-/-/-/-/-/-/-/-/-/-/-/-/-/-/-/-/-/-/-/-/-/-/-/-/-/-/-/-/-/-/-/-/-/-/-/-/-/-/-/-/-	47	28	HF32232/HF32231/HF32233/HF08054/novel.1400/HF24656/HF37818/novel.1315/novel.576/HF29781/HF39985/HF42312/HF25881/novel.3097/HF23672/HF08914/HF40721/HF16862/HF08475/novel.1398/HF19028/novel.3490/HF13468/HF39986/HF29780/HF21098/HF04035/HF09057	19	HF26931/HF24647/novel.3075/novel.278/HF39957/HF42779/novel.2976/HF32543/novel.2251/HF21572/novel.3067/HF35281/HF23544/HF04517/HF42775/HF42780/HF24645/HF13390/HF00377
MF	GO:0016705	oxidoreductase activity, acting on paired donors, with incorporation or reduction of molecular oxygen	46/963	345/16669	9.81872e-08	1.22141e-05	HF32232/HF32231/HF24647/HF32233/novel.3075/HF08054/HF39957/novel.1400/HF24656/HF42779/novel.551/HF40113/novel.2976/novel.1315/HF32543/novel.576/HF29781/HF39985/novel.2251/HF42312/novel.3097/HF23672/HF23957/HF21572/HF08914/HF09320/novel.3067/HF35281/HF40721/HF23544/HF16862/HF04517/HF42775/HF42780/HF24645/novel.1398/HF19028/HF13390/novel.3490/HF13468/HF40115/HF39986/HF29780/HF00377/HF21098/HF09057	-/-/-/-/-/-/-/-/-/-/-/-/-/-/-/-/-/-/-/-/-/-/-/-/-/-/-/-/-/-/-/-/-/-/-/-/-/-/-/-/-/-/-/-/-/-	46	27	HF32232/HF32231/HF32233/HF08054/novel.1400/HF24656/novel.551/novel.1315/novel.576/HF29781/HF39985/HF42312/novel.3097/HF23672/HF23957/HF08914/HF40721/HF16862/novel.1398/HF19028/novel.3490/HF13468/HF40115/HF39986/HF29780/HF21098/HF09057	19	HF24647/novel.3075/HF39957/HF42779/HF40113/novel.2976/HF32543/novel.2251/HF21572/HF09320/novel.3067/HF35281/HF23544/HF04517/HF42775/HF42780/HF24645/HF13390/HF00377
MF	GO:0020037	heme binding	52/963	419/16669	1.52925e-07	1.22141e-05	HF32232/HF32231/HF24647/HF32233/novel.3075/HF08054/HF39957/novel.1400/HF24656/HF40774/HF42779/HF18566/HF02241/novel.2976/novel.1315/HF32543/novel.576/HF29781/HF39985/novel.2251/HF42312/novel.3097/HF23619/HF39717/HF23672/HF21572/HF08914/novel.3067/HF43040/HF35281/HF40721/HF23544/HF16862/HF04517/HF42775/HF42780/HF24645/novel.1398/HF39725/HF19028/HF13390/novel.3490/HF26468/HF13468/HF01608/HF42276/HF…	-/-/-/-/-/-/-/-/-/-/-/-/-/-/-/-/-/-/-/-/-/-/-/-/-/-/-/-/-/-/-/-/-/-/-/-/-/-/-/-/-/-/-/-/-/-/-/-/-/-/-/-	52	33	HF32232/HF32231/HF32233/HF08054/novel.1400/HF24656/HF40774/HF18566/HF02241/novel.1315/novel.576/HF29781/HF39985/HF42312/novel.3097/HF23619/HF23672/HF08914/HF43040/HF40721/HF16862/novel.1398/HF19028/novel.3490/HF26468/HF13468/HF01608/HF42276/HF39986/HF25735/HF29780/HF21098/HF09057	19	HF24647/novel.3075/HF39957/HF42779/novel.2976/HF32543/novel.2251/HF39717/HF21572/novel.3067/HF35281/HF23544/HF04517/HF42775/HF42780/HF24645/HF39725/HF13390/HF00377
MF	GO:0046906	tetrapyrrole binding	52/963	420/16669	1.65056e-07	1.22141e-05	HF32232/HF32231/HF24647/HF32233/novel.3075/HF08054/HF39957/novel.1400/HF24656/HF40774/HF42779/HF18566/HF02241/novel.2976/novel.1315/HF32543/novel.576/HF29781/HF39985/novel.2251/HF42312/novel.3097/HF23619/HF39717/HF23672/HF21572/HF08914/novel.3067/HF43040/HF35281/HF40721/HF23544/HF16862/HF04517/HF42775/HF42780/HF24645/novel.1398/HF39725/HF19028/HF13390/novel.3490/HF26468/HF13468/HF01608/HF42276/HF…	-/-/-/-/-/-/-/-/-/-/-/-/-/-/-/-/-/-/-/-/-/-/-/-/-/-/-/-/-/-/-/-/-/-/-/-/-/-/-/-/-/-/-/-/-/-/-/-/-/-/-/-	52	33	HF32232/HF32231/HF32233/HF08054/novel.1400/HF24656/HF40774/HF18566/HF02241/novel.1315/novel.576/HF29781/HF39985/HF42312/novel.3097/HF23619/HF23672/HF08914/HF43040/HF40721/HF16862/novel.1398/HF19028/novel.3490/HF26468/HF13468/HF01608/HF42276/HF39986/HF25735/HF29780/HF21098/HF09057	19	HF24647/novel.3075/HF39957/HF42779/novel.2976/HF32543/novel.2251/HF39717/HF21572/novel.3067/HF35281/HF23544/HF04517/HF42775/HF42780/HF24645/HF39725/HF13390/HF00377
MF	GO:0043531	ADP binding	25/963	196/16669	0.00016503	0.00976978	HF40000/novel.350/novel.616/HF31157/novel.1097/HF40212/novel.2239/HF43815/novel.475/HF18886/HF36256/HF18927/HF43603/HF21525/novel.2248/HF34397/HF40216/HF40152/HF14485/novel.3652/HF34470/HF21906/HF28610/HF21520/HF28609	-/-/-/-/-/-/-/-/-/-/-/-/-/-/-/-/-/-/-/-/-/-/-/-/-	25	10	HF40000/novel.350/novel.616/HF31157/HF43815/novel.475/HF18886/HF21525/novel.3652/HF34470	15	novel.1097/HF40212/novel.2239/HF36256/HF18927/HF43603/novel.2248/HF34397/HF40216/HF40152/HF14485/HF21906/HF28610/HF21520/HF28609
MF	GO:0010333	terpene synthase activity	8/963	35/16669	0.000701142	0.0345897	HF12196/HF03677/HF41479/HF17847/novel.1786/HF22080/HF37663/HF37664	-/-/-/-/-/-/-/-	8	5	HF12196/HF03677/HF17847/novel.1786/HF22080	3	HF41479/HF37663/HF37664
MF	GO:0016838	carbon-oxygen lyase activity, acting on phosphates	8/963	39/16669	0.00149331	0.0583328	HF12196/HF03677/HF41479/HF17847/novel.1786/HF22080/HF37663/HF37664	-/-/-/-/-/-/-/-	8	5	HF12196/HF03677/HF17847/novel.1786/HF22080	3	HF41479/HF37663/HF37664
MF	GO:0016160	amylase activity	9/963	49/16669	0.00175341	0.0583328	HF04141/HF13132/HF17970/HF04121/HF13643/HF04116/HF37337/HF26660/novel.2945	-/-/-/-/-/-/-/-/-	9	5	HF13132/HF17970/HF13643/HF26660/novel.2945	4	HF04141/HF04121/HF04116/HF37337
MF	GO:0016161	beta-amylase activity	8/963	40/16669	0.00177363	0.0583328	HF04141/HF13132/HF17970/HF04121/HF04116/HF37337/HF26660/novel.2945	-/-/-/-/-/-/-/-	8	4	HF13132/HF17970/HF26660/novel.2945	4	HF04141/HF04121/HF04116/HF37337
MF	GO:0008171	O-methyltransferase activity	9/963	50/16669	0.00203073	0.0601095	HF15239/HF42791/HF35285/HF26074/HF23992/HF41212/HF23341/HF10508/HF33556	-/-/-/-/-/-/-/-/-	9	5	HF15239/HF42791/HF23992/HF41212/HF23341	4	HF35285/HF26074/HF10508/HF33556
MF	GO:0045735	nutrient reservoir activity	8/963	43/16669	0.00286969	0.0772207	HF34648/HF40774/HF34647/HF15697/HF06247/HF11710/HF01743/HF23180	-/-/-/-/-/-/-/-	8	2	HF40774/HF01743	6	HF34648/HF34647/HF15697/HF06247/HF11710/HF23180
MF	GO:0004097	catechol oxidase activity	4/963	13/16669	0.00519903	0.128243	HF17941/HF17936/HF12091/HF12095	-/-/-/-	4	3	HF17941/HF17936/HF12091	1	HF12095
MF	GO:0016702	oxidoreductase activity, acting on single donors with incorporation of molecular oxygen, incorporation of two atoms of oxygen	8/963	52/16669	0.00943305	0.176957	HF13896/HF16930/HF16918/novel.80/HF18003/HF16927/HF12046/HF15881	-/-/-/-/-/-/-/-	8	5	HF13896/HF16930/HF16918/novel.80/HF18003	3	HF16927/HF12046/HF15881
MF	GO:0016209	antioxidant activity	17/963	159/16669	0.010521	0.176957	novel.3281/HF40774/HF18566/HF02241/HF07024/HF08791/HF41931/HF23619/HF39717/HF13974/HF43040/HF39725/HF26468/novel.2567/HF01608/HF42276/HF25735	-/-/-/-/-/-/-/-/-/-/-/-/-/-/-/-/-	17	10	HF40774/HF18566/HF02241/HF08791/HF23619/HF43040/HF26468/HF01608/HF42276/HF25735	7	novel.3281/HF07024/HF41931/HF39717/HF13974/HF39725/novel.2567
MF	GO:0005216	ion channel activity	12/963	99/16669	0.0116091	0.176957	HF18741/HF10664/novel.1643/HF03202/HF33703/HF03910/HF11988/HF10670/HF11981/HF25993/HF26010/HF26012	-/-/-/-/-/-/-/-/-/-/-/-	12	7	HF03202/HF33703/HF11988/HF10670/HF11981/HF25993/HF26012	5	HF18741/HF10664/novel.1643/HF03910/HF26010
MF	GO:0015267	channel activity	12/963	99/16669	0.0116091	0.176957	HF18741/HF10664/novel.1643/HF03202/HF33703/HF03910/HF11988/HF10670/HF11981/HF25993/HF26010/HF26012	-/-/-/-/-/-/-/-/-/-/-/-	12	7	HF03202/HF33703/HF11988/HF10670/HF11981/HF25993/HF26012	5	HF18741/HF10664/novel.1643/HF03910/HF26010
MF	GO:0022803	passive transmembrane transporter activity	12/963	99/16669	0.0116091	0.176957	HF18741/HF10664/novel.1643/HF03202/HF33703/HF03910/HF11988/HF10670/HF11981/HF25993/HF26010/HF26012	-/-/-/-/-/-/-/-/-/-/-/-	12	7	HF03202/HF33703/HF11988/HF10670/HF11981/HF25993/HF26012	5	HF18741/HF10664/novel.1643/HF03910/HF26010
MF	GO:0022838	substrate-specific channel activity	12/963	99/16669	0.0116091	0.176957	HF18741/HF10664/novel.1643/HF03202/HF33703/HF03910/HF11988/HF10670/HF11981/HF25993/HF26010/HF26012	-/-/-/-/-/-/-/-/-/-/-/-	12	7	HF03202/HF33703/HF11988/HF10670/HF11981/HF25993/HF26012	5	HF18741/HF10664/novel.1643/HF03910/HF26010
MF	GO:0016701	oxidoreductase activity, acting on single donors with incorporation of molecular oxygen	9/963	65/16669	0.0120032	0.176957	HF13896/HF16930/HF16918/novel.80/HF18003/HF16927/HF21287/HF12046/HF15881	-/-/-/-/-/-/-/-/-	9	6	HF13896/HF16930/HF16918/novel.80/HF18003/HF21287	3	HF16927/HF12046/HF15881
MF	GO:0051213	dioxygenase activity	8/963	55/16669	0.0131187	0.176957	HF13896/HF16930/HF16918/novel.80/HF18003/HF16927/HF12046/HF15881	-/-/-/-/-/-/-/-	8	5	HF13896/HF16930/HF16918/novel.80/HF18003	3	HF16927/HF12046/HF15881
MF	GO:0022836	gated channel activity	7/963	45/16669	0.0139379	0.176957	HF10664/HF03202/HF33703/HF03910/HF11988/HF10670/HF11981	-/-/-/-/-/-/-	7	5	HF03202/HF33703/HF11988/HF10670/HF11981	2	HF10664/HF03910
MF	GO:0022839	ion gated channel activity	7/963	45/16669	0.0139379	0.176957	HF10664/HF03202/HF33703/HF03910/HF11988/HF10670/HF11981	-/-/-/-/-/-/-	7	5	HF03202/HF33703/HF11988/HF10670/HF11981	2	HF10664/HF03910
MF	GO:0004144	diacylglycerol O-acyltransferase activity	3/963	10/16669	0.0169839	0.176957	HF32379/HF32382/HF32368	-/-/-	3	0		3	HF32379/HF32382/HF32368
MF	GO:0016411	acylglycerol O-acyltransferase activity	3/963	10/16669	0.0169839	0.176957	HF32379/HF32382/HF32368	-/-/-	3	0		3	HF32379/HF32382/HF32368
MF	GO:0016682	oxidoreductase activity, acting on diphenols and related substances as donors, oxygen as acceptor	4/963	18/16669	0.0176759	0.176957	HF17941/HF17936/HF12091/HF12095	-/-/-/-	4	3	HF17941/HF17936/HF12091	1	HF12095
MF	GO:0004601	peroxidase activity	15/963	144/16669	0.0194045	0.176957	HF40774/HF18566/HF02241/HF07024/HF08791/HF23619/HF39717/HF13974/HF43040/HF39725/HF26468/novel.2567/HF01608/HF42276/HF25735	-/-/-/-/-/-/-/-/-/-/-/-/-/-/-	15	10	HF40774/HF18566/HF02241/HF08791/HF23619/HF43040/HF26468/HF01608/HF42276/HF25735	5	HF07024/HF39717/HF13974/HF39725/novel.2567
MF	GO:0004970	ionotropic glutamate receptor activity	5/963	28/16669	0.0206378	0.176957	HF03202/HF33703/HF03910/HF11988/HF11981	-/-/-/-/-	5	4	HF03202/HF33703/HF11988/HF11981	1	HF03910
MF	GO:0005230	extracellular ligand-gated ion channel activity	5/963	28/16669	0.0206378	0.176957	HF03202/HF33703/HF03910/HF11988/HF11981	-/-/-/-/-	5	4	HF03202/HF33703/HF11988/HF11981	1	HF03910
MF	GO:0008066	glutamate receptor activity	5/963	28/16669	0.0206378	0.176957	HF03202/HF33703/HF03910/HF11988/HF11981	-/-/-/-/-	5	4	HF03202/HF33703/HF11988/HF11981	1	HF03910
MF	GO:0015276	ligand-gated ion channel activity	5/963	28/16669	0.0206378	0.176957	HF03202/HF33703/HF03910/HF11988/HF11981	-/-/-/-/-	5	4	HF03202/HF33703/HF11988/HF11981	1	HF03910
MF	GO:0022824	transmitter-gated ion channel activity	5/963	28/16669	0.0206378	0.176957	HF03202/HF33703/HF03910/HF11988/HF11981	-/-/-/-/-	5	4	HF03202/HF33703/HF11988/HF11981	1	HF03910
MF	GO:0022834	ligand-gated channel activity	5/963	28/16669	0.0206378	0.176957	HF03202/HF33703/HF03910/HF11988/HF11981	-/-/-/-/-	5	4	HF03202/HF33703/HF11988/HF11981	1	HF03910
MF	GO:0022835	transmitter-gated channel activity	5/963	28/16669	0.0206378	0.176957	HF03202/HF33703/HF03910/HF11988/HF11981	-/-/-/-/-	5	4	HF03202/HF33703/HF11988/HF11981	1	HF03910
MF	GO:0030594	neurotransmitter receptor activity	5/963	28/16669	0.0206378	0.176957	HF03202/HF33703/HF03910/HF11988/HF11981	-/-/-/-/-	5	4	HF03202/HF33703/HF11988/HF11981	1	HF03910
MF	GO:0004252	serine-type endopeptidase activity	11/963	95/16669	0.020924	0.176957	HF25263/HF25262/HF11750/HF08279/HF40233/HF27222/HF40234/novel.1856/HF25266/HF25267/HF06213	-/-/-/-/-/-/-/-/-/-/-	11	4	HF25263/HF25262/HF40234/HF25266	7	HF11750/HF08279/HF40233/HF27222/novel.1856/HF25267/HF06213
MF	GO:0016835	carbon-oxygen lyase activity	12/963	108/16669	0.0219234	0.178641	HF13317/HF12196/HF03677/HF41479/novel.1499/HF17847/HF14426/novel.1786/HF22080/HF37663/HF18756/HF37664	-/-/-/-/-/-/-/-/-/-/-/-	12	8	HF13317/HF12196/HF03677/novel.1499/HF17847/novel.1786/HF22080/HF18756	4	HF41479/HF14426/HF37663/HF37664
MF	GO:0004553	hydrolase activity, hydrolyzing O-glycosyl compounds	38/963	470/16669	0.022893	0.178641	HF08921/HF04141/HF22290/HF22291/HF04034/HF34528/HF30940/HF36692/HF40136/HF37933/HF13132/HF23472/HF17970/HF16213/HF04121/novel.627/HF13643/HF04116/HF43076/HF37337/HF26814/HF04274/HF05168/HF26660/HF17499/HF02449/HF43762/HF23927/HF12389/HF21339/HF27679/HF00861/HF19224/HF40134/HF19002/novel.2945/HF27258/HF34088	-/-/-/-/-/-/-/-/-/-/-/-/-/-/-/-/-/-/-/-/-/-/-/-/-/-/-/-/-/-/-/-/-/-/-/-/-/-	38	24	HF08921/HF22290/HF22291/HF30940/HF36692/HF40136/HF37933/HF13132/HF23472/HF17970/HF16213/novel.627/HF13643/HF05168/HF26660/HF02449/HF43762/HF21339/HF00861/HF40134/HF19002/novel.2945/HF27258/HF34088	14	HF04141/HF04034/HF34528/HF04121/HF04116/HF43076/HF37337/HF26814/HF04274/HF17499/HF23927/HF12389/HF27679/HF19224
MF	GO:0016684	oxidoreductase activity, acting on peroxide as acceptor	15/963	147/16669	0.0229336	0.178641	HF40774/HF18566/HF02241/HF07024/HF08791/HF23619/HF39717/HF13974/HF43040/HF39725/HF26468/novel.2567/HF01608/HF42276/HF25735	-/-/-/-/-/-/-/-/-/-/-/-/-/-/-	15	10	HF40774/HF18566/HF02241/HF08791/HF23619/HF43040/HF26468/HF01608/HF42276/HF25735	5	HF07024/HF39717/HF13974/HF39725/novel.2567
MF	GO:0016798	hydrolase activity, acting on glycosyl bonds	39/963	490/16669	0.0265957	0.196562	HF08921/HF04141/HF22290/HF22291/HF04034/HF34528/HF30940/HF36692/HF40136/HF37933/HF13132/HF23472/HF17970/HF16213/HF04121/novel.627/HF13643/HF04116/HF43076/HF37337/HF26814/HF04274/HF05168/HF26660/HF17499/HF08439/HF02449/HF43762/HF23927/HF12389/HF21339/HF27679/HF00861/HF19224/HF40134/HF19002/novel.2945/HF27258/HF34088	-/-/-/-/-/-/-/-/-/-/-/-/-/-/-/-/-/-/-/-/-/-/-/-/-/-/-/-/-/-/-/-/-/-/-/-/-/-/-	39	25	HF08921/HF22290/HF22291/HF30940/HF36692/HF40136/HF37933/HF13132/HF23472/HF17970/HF16213/novel.627/HF13643/HF05168/HF26660/HF08439/HF02449/HF43762/HF21339/HF00861/HF40134/HF19002/novel.2945/HF27258/HF34088	14	HF04141/HF04034/HF34528/HF04121/HF04116/HF43076/HF37337/HF26814/HF04274/HF17499/HF23927/HF12389/HF27679/HF19224
MF	GO:0004527	exonuclease activity	5/963	30/16669	0.0272265	0.196562	HF16731/HF04349/HF04884/HF06248/HF38108	-/-/-/-/-	5	2	HF04349/HF04884	3	HF16731/HF06248/HF38108
MF	GO:0004888	transmembrane signaling receptor activity	5/963	30/16669	0.0272265	0.196562	HF03202/HF33703/HF03910/HF11988/HF11981	-/-/-/-/-	5	4	HF03202/HF33703/HF11988/HF11981	1	HF03910
MF	GO:0004602	glutathione peroxidase activity	3/963	14/16669	0.0433802	0.298617	HF07024/HF13974/novel.2567	-/-/-	3	0		3	HF07024/HF13974/novel.2567
MF	GO:0016717	oxidoreductase activity, acting on paired donors, with oxidation of a pair of donors resulting in the reduction of molecular oxygen to two molecules of water	3/963	14/16669	0.0433802	0.298617	HF40113/HF23957/HF40115	-/-/-	3	2	HF23957/HF40115	1	HF40113
MF	GO:0008236	serine-type peptidase activity	15/963	165/16669	0.0548621	0.360871	HF41921/HF25263/HF25262/HF11750/HF08133/HF08279/HF40233/HF27222/HF34585/HF33393/HF40234/novel.1856/HF25266/HF25267/HF06213	-/-/-/-/-/-/-/-/-/-/-/-/-/-/-	15	5	HF41921/HF25263/HF25262/HF40234/HF25266	10	HF11750/HF08133/HF08279/HF40233/HF27222/HF34585/HF33393/novel.1856/HF25267/HF06213
MF	GO:0017171	serine hydrolase activity	15/963	165/16669	0.0548621	0.360871	HF41921/HF25263/HF25262/HF11750/HF08133/HF08279/HF40233/HF27222/HF34585/HF33393/HF40234/novel.1856/HF25266/HF25267/HF06213	-/-/-/-/-/-/-/-/-/-/-/-/-/-/-	15	5	HF41921/HF25263/HF25262/HF40234/HF25266	10	HF11750/HF08133/HF08279/HF40233/HF27222/HF34585/HF33393/novel.1856/HF25267/HF06213
MF	GO:0003854	3-beta-hydroxy-delta5-steroid dehydrogenase activity	3/963	16/16669	0.061295	0.377986	HF02462/HF37260/HF08593	-/-/-	3	1	HF37260	2	HF02462/HF08593
MF	GO:0016229	steroid dehydrogenase activity	3/963	16/16669	0.061295	0.377986	HF02462/HF37260/HF08593	-/-/-	3	1	HF37260	2	HF02462/HF08593
MF	GO:0033764	steroid dehydrogenase activity, acting on the CH-OH group of donors, NAD or NADP as acceptor	3/963	16/16669	0.061295	0.377986	HF02462/HF37260/HF08593	-/-/-	3	1	HF37260	2	HF02462/HF08593
MF	GO:0015103	inorganic anion transmembrane transporter activity	5/963	38/16669	0.0659517	0.398402	HF10664/HF01765/HF34001/HF10670/HF02991	-/-/-/-/-	5	3	HF01765/HF34001/HF10670	2	HF10664/HF02991
MF	GO:0016679	oxidoreductase activity, acting on diphenols and related substances as donors	4/963	27/16669	0.0674542	0.399329	HF17941/HF17936/HF12091/HF12095	-/-/-/-	4	3	HF17941/HF17936/HF12091	1	HF12095
MF	GO:0016762	xyloglucan:xyloglucosyl transferase activity	4/963	29/16669	0.0834924	0.484583	HF16213/HF02449/HF00861/HF27258	-/-/-/-	4	4	HF16213/HF02449/HF00861/HF27258	0
MF	GO:0016788	hydrolase activity, acting on ester bonds	35/963	484/16669	0.100748	0.572658	HF16731/HF19280/HF33137/HF11887/HF32922/novel.811/HF25316/HF04349/HF25578/HF13532/HF04884/HF11966/HF02090/HF13611/HF28657/HF19095/HF00545/novel.1645/HF07918/HF28911/HF37740/HF25582/HF00367/HF34047/HF18504/HF41221/novel.3422/HF06248/HF13495/HF03829/HF38108/HF36945/HF41312/HF03489/HF40002	-/-/-/-/-/-/-/-/-/-/-/-/-/-/-/-/-/-/-/-/-/-/-/-/-/-/-/-/-/-/-/-/-/-/-	35	16	HF32922/HF25316/HF04349/HF25578/HF13532/HF04884/HF11966/HF02090/HF28657/HF37740/HF25582/HF00367/HF34047/HF18504/HF41312/HF03489	19	HF16731/HF19280/HF33137/HF11887/novel.811/HF13611/HF19095/HF00545/novel.1645/HF07918/HF28911/HF41221/novel.3422/HF06248/HF13495/HF03829/HF38108/HF36945/HF40002
MF	GO:0046983	protein dimerization activity	35/963	488/16669	0.109383	0.572658	HF15239/HF21574/HF20604/novel.3736/HF44438/HF01208/HF11588/novel.1683/HF36568/HF17455/HF12036/HF28869/HF25290/novel.3412/novel.2407/HF26074/novel.3351/novel.2328/HF23992/HF42514/HF20605/HF27214/HF32365/novel.2501/HF24610/HF19679/HF37257/novel.1492/HF23339/HF08837/HF43699/HF33209/HF10508/HF33556/HF08301	-/-/-/-/-/-/-/-/-/-/-/-/-/-/-/-/-/-/-/-/-/-/-/-/-/-/-/-/-/-/-/-/-/-/-	35	14	HF15239/HF21574/HF01208/HF11588/novel.3412/novel.3351/HF23992/HF27214/HF32365/HF24610/HF23339/HF08837/HF43699/HF08301	21	HF20604/novel.3736/HF44438/novel.1683/HF36568/HF17455/HF12036/HF28869/HF25290/novel.2407/HF26074/novel.2328/HF42514/HF20605/novel.2501/HF19679/HF37257/novel.1492/HF33209/HF10508/HF33556
MF	GO:0004470	malic enzyme activity	2/963	10/16669	0.110275	0.572658	HF14454/HF21754	-/-	2	0		2	HF14454/HF21754
MF	GO:0004471	malate dehydrogenase (decarboxylating) (NAD+) activity	2/963	10/16669	0.110275	0.572658	HF14454/HF21754	-/-	2	0		2	HF14454/HF21754
MF	GO:0005375	copper ion transmembrane transporter activity	2/963	10/16669	0.110275	0.572658	HF21234/HF25617	-/-	2	2	HF21234/HF25617	0
MF	GO:0016615	malate dehydrogenase activity	2/963	10/16669	0.110275	0.572658	HF14454/HF21754	-/-	2	0		2	HF14454/HF21754
MF	GO:0008443	phosphofructokinase activity	3/963	21/16669	0.117993	0.591963	novel.2730/HF12316/HF28597	-/-/-	3	1	HF12316	2	novel.2730/HF28597
MF	GO:0019200	carbohydrate kinase activity	3/963	21/16669	0.117993	0.591963	novel.2730/HF12316/HF28597	-/-/-	3	1	HF12316	2	novel.2730/HF28597
MF	GO:0004175	endopeptidase activity	16/963	201/16669	0.120942	0.596648	HF25263/HF19575/HF25262/HF11750/HF05167/HF08279/HF33184/HF40233/HF27222/HF38817/HF40234/novel.1856/HF25266/HF25267/HF06213/HF25341	-/-/-/-/-/-/-/-/-/-/-/-/-/-/-/-	16	6	HF25263/HF25262/HF05167/HF33184/HF40234/HF25266	10	HF19575/HF11750/HF08279/HF40233/HF27222/HF38817/novel.1856/HF25267/HF06213/HF25341
MF	GO:0004568	chitinase activity	2/963	11/16669	0.129811	0.609905	HF30940/HF19224	-/-	2	1	HF30940	1	HF19224
MF	GO:0004784	superoxide dismutase activity	2/963	11/16669	0.129811	0.609905	novel.3281/HF41931	-/-	2	0		2	novel.3281/HF41931
MF	GO:0016721	oxidoreductase activity, acting on superoxide radicals as acceptor	2/963	11/16669	0.129811	0.609905	novel.3281/HF41931	-/-	2	0		2	novel.3281/HF41931
MF	GO:0048038	quinone binding	2/963	12/16669	0.15006	0.694028	HF38761/HF06541	-/-	2	1	HF38761	1	HF06541
MF	GO:0004612	phosphoenolpyruvate carboxykinase (ATP) activity	2/963	13/16669	0.170876	0.766352	HF34876/HF17404	-/-	2	0		2	HF34876/HF17404
MF	GO:0070566	adenylyltransferase activity	2/963	13/16669	0.170876	0.766352	HF01798/HF32196	-/-	2	1	HF32196	1	HF01798
MF	GO:0016829	lyase activity	16/963	214/16669	0.17541	0.774907	HF13317/HF12196/HF03677/HF34876/HF17404/HF41479/novel.1499/HF17847/HF14426/novel.1786/HF42271/HF25341/HF22080/HF37663/HF18756/HF37664	-/-/-/-/-/-/-/-/-/-/-/-/-/-/-/-	16	9	HF13317/HF12196/HF03677/novel.1499/HF17847/novel.1786/HF42271/HF22080/HF18756	7	HF34876/HF17404/HF41479/HF14426/HF25341/HF37663/HF37664
MF	GO:0004518	nuclease activity	9/963	109/16669	0.178435	0.774907	HF16731/HF04349/HF25578/HF04884/novel.1645/HF25582/HF06248/HF38108/HF40002	-/-/-/-/-/-/-/-/-	9	4	HF04349/HF25578/HF04884/HF25582	5	HF16731/novel.1645/HF06248/HF38108/HF40002
MF	GO:0008509	anion transmembrane transporter activity	6/963	66/16669	0.180637	0.774907	HF10664/HF01765/HF34001/HF10670/HF01213/HF02991	-/-/-/-/-/-	6	4	HF01765/HF34001/HF10670/HF01213	2	HF10664/HF02991
MF	GO:0000989	transcription factor activity, transcription factor binding	5/963	53/16669	0.190061	0.779028	HF11725/HF39863/HF39866/HF20528/HF23815	-/-/-/-/-	5	2	HF11725/HF23815	3	HF39863/HF39866/HF20528
MF	GO:0003712	transcription cofactor activity	5/963	53/16669	0.190061	0.779028	HF11725/HF39863/HF39866/HF20528/HF23815	-/-/-/-/-	5	2	HF11725/HF23815	3	HF39863/HF39866/HF20528
MF	GO:0016157	sucrose synthase activity	2/963	14/16669	0.192125	0.779028	HF30851/HF36979	-/-	2	1	HF36979	1	HF30851
MF	GO:0046915	transition metal ion transmembrane transporter activity	2/963	14/16669	0.192125	0.779028	HF21234/HF25617	-/-	2	2	HF21234/HF25617	0
MF	GO:0015238	drug transmembrane transporter activity	7/963	83/16669	0.202944	0.790648	HF37826/HF04077/HF35144/HF36534/HF36533/HF30631/HF15075	-/-/-/-/-/-/-	7	6	HF37826/HF35144/HF36534/HF36533/HF30631/HF15075	1	HF04077
MF	GO:0046527	glucosyltransferase activity	8/963	98/16669	0.205131	0.790648	HF39844/HF16213/HF30851/HF02449/HF39842/HF00861/HF36979/HF27258	-/-/-/-/-/-/-/-	8	5	HF16213/HF02449/HF00861/HF36979/HF27258	3	HF39844/HF30851/HF39842
MF	GO:0016758	transferase activity, transferring hexosyl groups	26/963	379/16669	0.207713	0.790648	HF39844/HF40221/HF41626/HF40192/HF16213/HF09333/novel.3691/HF24599/HF14488/HF07650/HF11508/HF38819/HF30851/HF07435/HF10308/HF40061/HF41259/HF02449/HF39842/HF43478/HF00861/HF36979/HF16895/novel.1942/HF27258/HF25289	-/-/-/-/-/-/-/-/-/-/-/-/-/-/-/-/-/-/-/-/-/-/-/-/-/-	26	13	HF40221/HF41626/HF16213/novel.3691/HF38819/HF40061/HF02449/HF00861/HF36979/HF16895/novel.1942/HF27258/HF25289	13	HF39844/HF40192/HF09333/HF24599/HF14488/HF07650/HF11508/HF30851/HF07435/HF10308/HF41259/HF39842/HF43478
MF	GO:0015116	sulfate transmembrane transporter activity	2/963	15/16669	0.213689	0.790648	HF01765/HF02991	-/-	2	1	HF01765	1	HF02991
MF	GO:0019207	kinase regulator activity	2/963	15/16669	0.213689	0.790648	HF40614/HF04741	-/-	2	1	HF40614	1	HF04741
MF	GO:0019887	protein kinase regulator activity	2/963	15/16669	0.213689	0.790648	HF40614/HF04741	-/-	2	1	HF40614	1	HF04741
MF	GO:1901682	sulfur compound transmembrane transporter activity	2/963	15/16669	0.213689	0.790648	HF01765/HF02991	-/-	2	1	HF01765	1	HF02991
MF	GO:0004857	enzyme inhibitor activity	8/963	101/16669	0.228387	0.81035	HF42043/HF04741/HF37321/HF25665/HF07918/HF28911/HF26405/HF01865	-/-/-/-/-/-/-/-	8	3	HF37321/HF25665/HF26405	5	HF42043/HF04741/HF07918/HF28911/HF01865
MF	GO:0038023	signaling receptor activity	5/963	57/16669	0.231945	0.81035	HF03202/HF33703/HF03910/HF11988/HF11981	-/-/-/-/-	5	4	HF03202/HF33703/HF11988/HF11981	1	HF03910
MF	GO:0060089	molecular transducer activity	5/963	57/16669	0.231945	0.81035	HF03202/HF33703/HF03910/HF11988/HF11981	-/-/-/-/-	5	4	HF03202/HF33703/HF11988/HF11981	1	HF03910
MF	GO:0016747	transferase activity, transferring acyl groups other than amino-acyl groups	17/963	242/16669	0.235812	0.81035	HF21620/HF15733/HF40207/HF21966/HF38317/HF27219/HF32379/HF33398/HF36333/HF37648/HF06721/HF41539/novel.217/HF22428/HF00824/HF32382/HF32368	-/-/-/-/-/-/-/-/-/-/-/-/-/-/-/-/-	17	8	HF40207/HF21966/HF38317/HF27219/HF36333/HF37648/HF22428/HF00824	9	HF21620/HF15733/HF32379/HF33398/HF06721/HF41539/novel.217/HF32382/HF32368
MF	GO:0003993	acid phosphatase activity	3/963	30/16669	0.249244	0.81035	HF13532/HF02090/HF18504	-/-/-	3	3	HF13532/HF02090/HF18504	0
MF	GO:0008374	O-acyltransferase activity	3/963	30/16669	0.249244	0.81035	HF32379/HF32382/HF32368	-/-/-	3	0		3	HF32379/HF32382/HF32368
MF	GO:0016741	transferase activity, transferring one-carbon groups	22/963	325/16669	0.250268	0.81035	HF15239/novel.3465/HF06854/HF05120/HF05121/HF42791/HF35285/HF26074/HF34547/HF23992/HF26691/HF41212/HF26371/HF31108/HF25777/HF38191/HF23341/HF05137/HF10508/HF33556/HF25051/HF13509	-/-/-/-/-/-/-/-/-/-/-/-/-/-/-/-/-/-/-/-/-/-	22	13	HF15239/novel.3465/HF05120/HF05121/HF42791/HF34547/HF23992/HF41212/HF26371/HF31108/HF38191/HF23341/HF13509	9	HF06854/HF35285/HF26074/HF26691/HF25777/HF05137/HF10508/HF33556/HF25051
MF	GO:0005244	voltage-gated ion channel activity	2/963	17/16669	0.257341	0.81035	HF10664/HF10670	-/-	2	1	HF10670	1	HF10664
MF	GO:0005247	voltage-gated chloride channel activity	2/963	17/16669	0.257341	0.81035	HF10664/HF10670	-/-	2	1	HF10670	1	HF10664
MF	GO:0005253	anion channel activity	2/963	17/16669	0.257341	0.81035	HF10664/HF10670	-/-	2	1	HF10670	1	HF10664
MF	GO:0005254	chloride channel activity	2/963	17/16669	0.257341	0.81035	HF10664/HF10670	-/-	2	1	HF10670	1	HF10664
MF	GO:0008308	voltage-gated anion channel activity	2/963	17/16669	0.257341	0.81035	HF10664/HF10670	-/-	2	1	HF10670	1	HF10664
MF	GO:0015108	chloride transmembrane transporter activity	2/963	17/16669	0.257341	0.81035	HF10664/HF10670	-/-	2	1	HF10670	1	HF10664
MF	GO:0022832	voltage-gated channel activity	2/963	17/16669	0.257341	0.81035	HF10664/HF10670	-/-	2	1	HF10670	1	HF10664
MF	GO:0004185	serine-type carboxypeptidase activity	4/963	45/16669	0.261099	0.813529	HF41921/HF08133/HF34585/HF33393	-/-/-/-	4	1	HF41921	3	HF08133/HF34585/HF33393
MF	GO:0008168	methyltransferase activity	21/963	313/16669	0.269679	0.831509	HF15239/novel.3465/HF06854/HF05120/HF05121/HF42791/HF35285/HF26074/HF34547/HF23992/HF26691/HF41212/HF26371/HF31108/HF25777/HF38191/HF23341/HF10508/HF33556/HF25051/HF13509	-/-/-/-/-/-/-/-/-/-/-/-/-/-/-/-/-/-/-/-/-	21	13	HF15239/novel.3465/HF05120/HF05121/HF42791/HF34547/HF23992/HF41212/HF26371/HF31108/HF38191/HF23341/HF13509	8	HF06854/HF35285/HF26074/HF26691/HF25777/HF10508/HF33556/HF25051
MF	GO:0003872	6-phosphofructokinase activity	2/963	18/16669	0.279249	0.834925	HF12316/HF28597	-/-	2	1	HF12316	1	HF28597
MF	GO:0017089	glycolipid transporter activity	2/963	18/16669	0.279249	0.834925	HF09911/HF43813	-/-	2	1	HF43813	1	HF09911
MF	GO:0051861	glycolipid binding	2/963	18/16669	0.279249	0.834925	HF09911/HF43813	-/-	2	1	HF43813	1	HF09911
MF	GO:0004180	carboxypeptidase activity	4/963	48/16669	0.300386	0.873798	HF41921/HF08133/HF34585/HF33393	-/-/-/-	4	1	HF41921	3	HF08133/HF34585/HF33393
MF	GO:0004611	phosphoenolpyruvate carboxykinase activity	2/963	19/16669	0.301106	0.873798	HF34876/HF17404	-/-	2	0		2	HF34876/HF17404
MF	GO:0019843	rRNA binding	2/963	19/16669	0.301106	0.873798	HF26427/HF24948	-/-	2	2	HF26427/HF24948	0
MF	GO:0030234	enzyme regulator activity	12/963	174/16669	0.305263	0.87726	HF11725/HF40614/HF42043/HF04741/novel.3351/HF37321/HF25665/HF30918/HF07918/HF28911/HF26405/HF01865	-/-/-/-/-/-/-/-/-/-/-/-	12	7	HF11725/HF40614/novel.3351/HF37321/HF25665/HF30918/HF26405	5	HF42043/HF04741/HF07918/HF28911/HF01865
MF	GO:0000988	transcription factor activity, protein binding	5/963	64/16669	0.310316	0.883057	HF11725/HF39863/HF39866/HF20528/HF23815	-/-/-/-/-	5	2	HF11725/HF23815	3	HF39863/HF39866/HF20528
MF	GO:0005516	calmodulin binding	3/963	34/16669	0.313247	0.883057	HF24599/HF06878/HF09484	-/-/-	3	1	HF09484	2	HF24599/HF06878
MF	GO:0015318	inorganic molecular entity transmembrane transporter activity	24/963	374/16669	0.326312	0.911212	HF18741/HF10664/HF25447/HF11571/HF21234/HF01765/HF35138/novel.1643/HF34001/HF03202/HF33974/HF33703/HF03910/HF42571/HF11988/HF10670/HF11981/HF25993/HF26010/HF26012/HF01213/HF25617/HF02991/HF04181	-/-/-/-/-/-/-/-/-/-/-/-/-/-/-/-/-/-/-/-/-/-/-/-	24	15	HF25447/HF21234/HF01765/HF35138/HF34001/HF03202/HF33703/HF11988/HF10670/HF11981/HF25993/HF26012/HF01213/HF25617/HF04181	9	HF18741/HF10664/HF11571/novel.1643/HF33974/HF03910/HF42571/HF26010/HF02991
MF	GO:0016791	phosphatase activity	7/963	98/16669	0.337661	0.918427	HF25316/HF13532/HF02090/HF28657/HF00367/HF18504/HF41221	-/-/-/-/-/-/-	7	6	HF25316/HF13532/HF02090/HF28657/HF00367/HF18504	1	HF41221
MF	GO:0070008	serine-type exopeptidase activity	4/963	51/16669	0.340285	0.918427	HF41921/HF08133/HF34585/HF33393	-/-/-/-	4	1	HF41921	3	HF08133/HF34585/HF33393
MF	GO:0001076	transcription factor activity, RNA polymerase II transcription factor binding	2/963	21/16669	0.34441	0.918427	HF20528/HF23815	-/-	2	1	HF23815	1	HF20528
MF	GO:0001104	RNA polymerase II transcription cofactor activity	2/963	21/16669	0.34441	0.918427	HF20528/HF23815	-/-	2	1	HF23815	1	HF20528
MF	GO:0008408	3'-5' exonuclease activity	2/963	21/16669	0.34441	0.918427	HF16731/HF38108	-/-	2	0		2	HF16731/HF38108
MF	GO:0015075	ion transmembrane transporter activity	25/963	402/16669	0.380569	0.9941	HF18741/HF10664/HF25447/HF11571/HF39705/HF21234/HF01765/novel.1643/HF34001/HF03202/HF33974/HF33703/HF15502/HF03910/HF42571/HF11988/HF10670/HF11981/HF25993/HF26010/HF26012/HF01213/HF25617/HF02991/HF04181	-/-/-/-/-/-/-/-/-/-/-/-/-/-/-/-/-/-/-/-/-/-/-/-/-	25	15	HF25447/HF21234/HF01765/HF34001/HF03202/HF33703/HF15502/HF11988/HF10670/HF11981/HF25993/HF26012/HF01213/HF25617/HF04181	10	HF18741/HF10664/HF11571/HF39705/novel.1643/HF33974/HF03910/HF42571/HF26010/HF02991
MF	GO:0004871	signal transducer activity	6/963	87/16669	0.388701	0.9941	HF03202/HF33703/HF03910/HF11988/HF28327/HF11981	-/-/-/-/-/-	6	5	HF03202/HF33703/HF11988/HF28327/HF11981	1	HF03910
MF	GO:0016651	oxidoreductase activity, acting on NAD(P)H	3/963	39/16669	0.393519	0.9941	HF39961/HF08791/HF22508	-/-/-	3	2	HF08791/HF22508	1	HF39961
MF	GO:0000287	magnesium ion binding	7/963	104/16669	0.394994	0.9941	HF12196/HF03677/HF41479/HF17847/HF22080/HF37663/HF37664	-/-/-/-/-/-/-	7	4	HF12196/HF03677/HF17847/HF22080	3	HF41479/HF37663/HF37664
MF	GO:0004674	protein serine/threonine kinase activity	2/963	24/16669	0.407552	0.9941	HF11330/novel.300	-/-	2	2	HF11330/novel.300	0
MF	GO:0008173	RNA methyltransferase activity	2/963	24/16669	0.407552	0.9941	HF26691/HF25051	-/-	2	0		2	HF26691/HF25051
MF	GO:0051087	chaperone binding	2/963	24/16669	0.407552	0.9941	HF10252/novel.3351	-/-	2	2	HF10252/novel.3351	0
MF	GO:0098772	molecular function regulator	13/963	209/16669	0.432769	0.9941	HF11725/HF40614/HF42043/HF04741/novel.3351/HF37321/HF25665/HF30918/novel.1147/HF07918/HF28911/HF26405/HF01865	-/-/-/-/-/-/-/-/-/-/-/-/-	13	8	HF11725/HF40614/novel.3351/HF37321/HF25665/HF30918/novel.1147/HF26405	5	HF42043/HF04741/HF07918/HF28911/HF01865
MF	GO:0016624	oxidoreductase activity, acting on the aldehyde or oxo group of donors, disulfide as acceptor	1/963	10/16669	0.448572	0.9941	HF06761	-	1	0		1	HF06761
MF	GO:0016655	oxidoreductase activity, acting on NAD(P)H, quinone or similar compound as acceptor	1/963	10/16669	0.448572	0.9941	HF39961	-	1	0		1	HF39961
MF	GO:0016814	hydrolase activity, acting on carbon-nitrogen (but not peptide) bonds, in cyclic amidines	1/963	10/16669	0.448572	0.9941	HF05137	-	1	0		1	HF05137
MF	GO:0016854	racemase and epimerase activity	1/963	10/16669	0.448572	0.9941	HF14442	-	1	1	HF14442	0
MF	GO:0050664	oxidoreductase activity, acting on NAD(P)H, oxygen as acceptor	1/963	10/16669	0.448572	0.9941	HF08791	-	1	1	HF08791	0
MF	GO:0060590	ATPase regulator activity	1/963	10/16669	0.448572	0.9941	novel.3351	-	1	1	novel.3351	0
MF	GO:0070011	peptidase activity, acting on L-amino acid peptides	25/963	416/16669	0.448713	0.9941	HF41921/HF25263/HF19575/HF25262/HF11750/HF05167/HF08133/novel.3483/novel.1289/HF08279/HF43512/HF33184/HF40233/HF27222/HF34585/HF33393/HF38817/HF40234/novel.1856/HF25266/HF25267/HF06213/novel.2097/HF25341/HF15738	-/-/-/-/-/-/-/-/-/-/-/-/-/-/-/-/-/-/-/-/-/-/-/-/-	25	12	HF41921/HF25263/HF25262/HF05167/novel.3483/novel.1289/HF43512/HF33184/HF40234/HF25266/novel.2097/HF15738	13	HF19575/HF11750/HF08133/HF08279/HF40233/HF27222/HF34585/HF33393/HF38817/novel.1856/HF25267/HF06213/HF25341
MF	GO:0015036	disulfide oxidoreductase activity	4/963	60/16669	0.459239	0.9941	HF02841/HF22508/HF33430/HF18049	-/-/-/-	4	3	HF02841/HF22508/HF18049	1	HF33430
MF	GO:0051287	NAD binding	4/963	60/16669	0.459239	0.9941	HF14454/HF27205/HF19822/HF21754	-/-/-/-	4	1	HF19822	3	HF14454/HF27205/HF21754
MF	GO:0030246	carbohydrate binding	12/963	196/16669	0.460585	0.9941	HF32091/HF21722/HF19131/HF03237/HF24089/HF07435/HF04592/HF03228/HF04590/novel.455/novel.1455/HF03233	-/-/-/-/-/-/-/-/-/-/-/-	12	7	HF32091/HF21722/HF04592/HF03228/novel.455/novel.1455/HF03233	5	HF19131/HF03237/HF24089/HF07435/HF04590
MF	GO:0046873	metal ion transmembrane transporter activity	6/963	94/16669	0.461524	0.9941	HF11571/HF21234/HF33974/HF42571/HF25617/HF04181	-/-/-/-/-/-	6	3	HF21234/HF25617/HF04181	3	HF11571/HF33974/HF42571
MF	GO:0016614	oxidoreductase activity, acting on CH-OH group of donors	12/963	198/16669	0.474783	0.9941	HF14454/HF38761/HF02462/HF11708/HF19822/HF21754/HF34282/HF26207/HF37260/HF30727/HF22137/HF08593	-/-/-/-/-/-/-/-/-/-/-/-	12	6	HF38761/HF11708/HF19822/HF34282/HF37260/HF30727	6	HF14454/HF02462/HF21754/HF26207/HF22137/HF08593
MF	GO:0004866	endopeptidase inhibitor activity	1/963	11/16669	0.480448	0.9941	HF01865	-	1	0		1	HF01865
MF	GO:0016641	oxidoreductase activity, acting on the CH-NH2 group of donors, oxygen as acceptor	1/963	11/16669	0.480448	0.9941	HF06541	-	1	0		1	HF06541
MF	GO:0016668	oxidoreductase activity, acting on a sulfur group of donors, NAD(P) as acceptor	1/963	11/16669	0.480448	0.9941	HF22508	-	1	1	HF22508	0
MF	GO:0016833	oxo-acid-lyase activity	1/963	11/16669	0.480448	0.9941	HF25341	-	1	0		1	HF25341
MF	GO:0030414	peptidase inhibitor activity	1/963	11/16669	0.480448	0.9941	HF01865	-	1	0		1	HF01865
MF	GO:0047134	protein-disulfide reductase activity	1/963	11/16669	0.480448	0.9941	HF22508	-	1	1	HF22508	0
MF	GO:0061134	peptidase regulator activity	1/963	11/16669	0.480448	0.9941	HF01865	-	1	0		1	HF01865
MF	GO:0061135	endopeptidase regulator activity	1/963	11/16669	0.480448	0.9941	HF01865	-	1	0		1	HF01865
MF	GO:0016836	hydro-lyase activity	4/963	62/16669	0.484822	0.9941	HF13317/novel.1499/HF14426/HF18756	-/-/-/-	4	3	HF13317/novel.1499/HF18756	1	HF14426
MF	GO:0016757	transferase activity, transferring glycosyl groups	29/963	493/16669	0.487671	0.9941	HF39844/HF40221/HF41626/HF40192/HF16213/HF09333/novel.3691/HF24599/HF42603/HF14488/HF07650/HF11508/HF38819/HF30851/HF07435/novel.2374/HF10308/HF40061/HF41259/HF26407/HF02449/HF39842/HF43478/HF00861/HF36979/HF16895/novel.1942/HF27258/HF25289	-/-/-/-/-/-/-/-/-/-/-/-/-/-/-/-/-/-/-/-/-/-/-/-/-/-/-/-/-	29	14	HF40221/HF41626/HF16213/novel.3691/HF38819/HF40061/HF26407/HF02449/HF00861/HF36979/HF16895/novel.1942/HF27258/HF25289	15	HF39844/HF40192/HF09333/HF24599/HF42603/HF14488/HF07650/HF11508/HF30851/HF07435/novel.2374/HF10308/HF41259/HF39842/HF43478
MF	GO:0008233	peptidase activity	26/963	442/16669	0.491335	0.9941	HF41921/HF25263/HF19575/HF25262/HF11750/HF05167/HF08133/novel.3483/novel.1289/HF08279/HF43512/HF33184/HF40233/HF27222/HF34585/HF33393/HF38817/HF40234/novel.1856/HF25266/novel.825/HF25267/HF06213/novel.2097/HF25341/HF15738	-/-/-/-/-/-/-/-/-/-/-/-/-/-/-/-/-/-/-/-/-/-/-/-/-/-	26	12	HF41921/HF25263/HF25262/HF05167/novel.3483/novel.1289/HF43512/HF33184/HF40234/HF25266/novel.2097/HF15738	14	HF19575/HF11750/HF08133/HF08279/HF40233/HF27222/HF34585/HF33393/HF38817/novel.1856/novel.825/HF25267/HF06213/HF25341
MF	GO:0016667	oxidoreductase activity, acting on a sulfur group of donors	5/963	80/16669	0.494558	0.9941	HF02841/novel.1289/HF22508/HF33430/HF18049	-/-/-/-/-	5	4	HF02841/novel.1289/HF22508/HF18049	1	HF33430
MF	GO:0016746	transferase activity, transferring acyl groups	18/963	305/16669	0.497761	0.9941	HF21620/HF15733/HF40207/HF43134/HF21966/HF38317/HF27219/HF32379/HF33398/HF36333/HF37648/HF06721/HF41539/novel.217/HF22428/HF00824/HF32382/HF32368	-/-/-/-/-/-/-/-/-/-/-/-/-/-/-/-/-/-	18	8	HF40207/HF21966/HF38317/HF27219/HF36333/HF37648/HF22428/HF00824	10	HF21620/HF15733/HF43134/HF32379/HF33398/HF06721/HF41539/novel.217/HF32382/HF32368
MF	GO:0042578	phosphoric ester hydrolase activity	9/963	150/16669	0.502649	0.9941	HF32922/HF25316/HF13532/HF02090/HF28657/HF37740/HF00367/HF18504/HF41221	-/-/-/-/-/-/-/-/-	9	8	HF32922/HF25316/HF13532/HF02090/HF28657/HF37740/HF00367/HF18504	1	HF41221
MF	GO:0030170	pyridoxal phosphate binding	5/963	81/16669	0.50564	0.9941	HF32183/HF10284/HF01391/HF37873/HF20852	-/-/-/-/-	5	3	HF32183/HF01391/HF20852	2	HF10284/HF37873
MF	GO:0070279	vitamin B6 binding	5/963	81/16669	0.50564	0.9941	HF32183/HF10284/HF01391/HF37873/HF20852	-/-/-/-/-	5	3	HF32183/HF01391/HF20852	2	HF10284/HF37873
MF	GO:0003729	mRNA binding	1/963	12/16669	0.510484	0.9941	novel.1238	-	1	1	novel.1238	0
MF	GO:0008519	ammonium transmembrane transporter activity	1/963	12/16669	0.510484	0.9941	HF15502	-	1	1	HF15502	0
MF	GO:0016881	acid-amino acid ligase activity	1/963	12/16669	0.510484	0.9941	HF10899	-	1	0		1	HF10899
MF	GO:0019139	cytokinin dehydrogenase activity	1/963	12/16669	0.510484	0.9941	HF30727	-	1	1	HF30727	0
MF	GO:0042132	fructose 1,6-bisphosphate 1-phosphatase activity	1/963	12/16669	0.510484	0.9941	HF25316	-	1	1	HF25316	0
MF	GO:0016627	oxidoreductase activity, acting on the CH-CH group of donors	3/963	47/16669	0.515541	0.997387	HF06626/HF27754/HF18330	-/-/-	3	1	HF18330	2	HF06626/HF27754
MF	GO:0019842	vitamin binding	6/963	100/16669	0.522121	0.997855	novel.1238/HF32183/HF10284/HF01391/HF37873/HF20852	-/-/-/-/-/-	6	4	novel.1238/HF32183/HF01391/HF20852	2	HF10284/HF37873
MF	GO:0016616	oxidoreductase activity, acting on the CH-OH group of donors, NAD or NADP as acceptor	8/963	135/16669	0.522525	0.997855	HF14454/HF02462/HF19822/HF21754/HF26207/HF37260/HF22137/HF08593	-/-/-/-/-/-/-/-	8	2	HF19822/HF37260	6	HF14454/HF02462/HF21754/HF26207/HF22137/HF08593
MF	GO:0004616	phosphogluconate dehydrogenase (decarboxylating) activity	1/963	13/16669	0.538784	0.999577	HF19822	-	1	1	HF19822	0
MF	GO:0015291	secondary active transmembrane transporter activity	9/963	155/16669	0.542704	0.999577	HF37826/HF25447/HF04077/HF35138/HF35144/HF36534/HF36533/HF30631/HF15075	-/-/-/-/-/-/-/-/-	9	8	HF37826/HF25447/HF35138/HF35144/HF36534/HF36533/HF30631/HF15075	1	HF04077
MF	GO:0015035	protein disulfide oxidoreductase activity	3/963	49/16669	0.543988	0.999577	HF02841/HF33430/HF18049	-/-/-	3	2	HF02841/HF18049	1	HF33430
MF	GO:0035251	UDP-glucosyltransferase activity	4/963	67/16669	0.546444	0.999577	HF39844/HF30851/HF39842/HF36979	-/-/-/-	4	1	HF36979	3	HF39844/HF30851/HF39842
MF	GO:0050662	coenzyme binding	24/963	420/16669	0.552772	0.999577	HF10031/HF14454/HF32183/HF11706/HF36231/HF27205/novel.449/HF11708/HF10284/HF19822/HF01391/HF11697/HF21754/HF09320/HF05283/HF34282/HF17510/HF26207/HF34654/HF06917/HF30727/HF14142/HF37873/HF20852	-/-/-/-/-/-/-/-/-/-/-/-/-/-/-/-/-/-/-/-/-/-/-/-	24	12	HF10031/HF32183/HF36231/novel.449/HF11708/HF19822/HF01391/HF11697/HF34282/HF06917/HF30727/HF20852	12	HF14454/HF11706/HF27205/HF10284/HF21754/HF09320/HF05283/HF17510/HF26207/HF34654/HF14142/HF37873
MF	GO:0015297	antiporter activity	8/963	139/16669	0.556123	0.999577	HF37826/HF25447/HF04077/HF35144/HF36534/HF36533/HF30631/HF15075	-/-/-/-/-/-/-/-	8	7	HF37826/HF25447/HF35144/HF36534/HF36533/HF30631/HF15075	1	HF04077
MF	GO:0004222	metalloendopeptidase activity	3/963	50/16669	0.557841	0.999577	HF33184/HF38817/HF25341	-/-/-	3	1	HF33184	2	HF38817/HF25341
MF	GO:0016872	intramolecular lyase activity	1/963	14/16669	0.565451	0.999577	novel.157	-	1	1	novel.157	0
MF	GO:0033897	ribonuclease T2 activity	1/963	14/16669	0.565451	0.999577	HF40002	-	1	0		1	HF40002
MF	GO:0008238	exopeptidase activity	4/963	69/16669	0.569998	0.999577	HF41921/HF08133/HF34585/HF33393	-/-/-/-	4	1	HF41921	3	HF08133/HF34585/HF33393
MF	GO:0005088	Ras guanyl-nucleotide exchange factor activity	1/963	15/16669	0.590576	0.999577	novel.1147	-	1	1	novel.1147	0
MF	GO:0005089	Rho guanyl-nucleotide exchange factor activity	1/963	15/16669	0.590576	0.999577	novel.1147	-	1	1	novel.1147	0
MF	GO:0008483	transaminase activity	1/963	15/16669	0.590576	0.999577	HF37873	-	1	0		1	HF37873
MF	GO:0016769	transferase activity, transferring nitrogenous groups	1/963	15/16669	0.590576	0.999577	HF37873	-	1	0		1	HF37873
MF	GO:0017048	Rho GTPase binding	1/963	15/16669	0.590576	0.999577	novel.1147	-	1	1	novel.1147	0
MF	GO:0030983	mismatched DNA binding	1/963	15/16669	0.590576	0.999577	HF28512	-	1	1	HF28512	0
MF	GO:0001871	pattern binding	3/963	53/16669	0.59784	0.999577	HF21722/novel.455/novel.1455	-/-/-	3	3	HF21722/novel.455/novel.1455	0
MF	GO:0030247	polysaccharide binding	3/963	53/16669	0.59784	0.999577	HF21722/novel.455/novel.1455	-/-/-	3	3	HF21722/novel.455/novel.1455	0
MF	GO:0016759	cellulose synthase activity	2/963	35/16669	0.608339	0.999577	HF39844/HF39842	-/-	2	0		2	HF39844/HF39842
MF	GO:0016760	cellulose synthase (UDP-forming) activity	2/963	35/16669	0.608339	0.999577	HF39844/HF39842	-/-	2	0		2	HF39844/HF39842
MF	GO:0005507	copper ion binding	5/963	91/16669	0.610212	0.999577	HF27892/HF06541/HF26130/HF31284/HF03283	-/-/-/-/-	5	2	HF26130/HF31284	3	HF27892/HF06541/HF03283
MF	GO:0004190	aspartic-type endopeptidase activity	1/963	16/16669	0.614251	0.999577	HF05167	-	1	1	HF05167	0
MF	GO:0016638	oxidoreductase activity, acting on the CH-NH2 group of donors	1/963	16/16669	0.614251	0.999577	HF06541	-	1	0		1	HF06541
MF	GO:0016671	oxidoreductase activity, acting on a sulfur group of donors, disulfide as acceptor	1/963	16/16669	0.614251	0.999577	novel.1289	-	1	1	novel.1289	0
MF	GO:0016799	hydrolase activity, hydrolyzing N-glycosyl compounds	1/963	16/16669	0.614251	0.999577	HF08439	-	1	1	HF08439	0
MF	GO:0070001	aspartic-type peptidase activity	1/963	16/16669	0.614251	0.999577	HF05167	-	1	1	HF05167	0
MF	GO:0043565	sequence-specific DNA binding	17/963	309/16669	0.618252	0.999577	novel.1523/HF44405/HF06881/HF27430/HF07575/HF00266/HF13352/HF38376/HF42013/HF16773/HF40081/HF34063/HF37735/HF28202/HF04300/HF42817/HF14656	-/-/-/-/-/-/-/-/-/-/-/-/-/-/-/-/-	17	12	novel.1523/HF44405/HF06881/HF27430/HF07575/HF13352/HF42013/HF16773/HF34063/HF28202/HF04300/HF42817	5	HF00266/HF38376/HF40081/HF37735/HF14656
MF	GO:0140097	catalytic activity, acting on DNA	4/963	74/16669	0.625749	0.999577	HF04349/HF04884/novel.3057/HF06248	-/-/-/-	4	3	HF04349/HF04884/novel.3057	1	HF06248
MF	GO:0050661	NADP binding	2/963	37/16669	0.638786	0.999577	HF09320/HF26207	-/-	2	0		2	HF09320/HF26207
MF	GO:0003899	DNA-directed 5'-3' RNA polymerase activity	4/963	77/16669	0.656904	0.999577	HF28734/HF08267/HF43699/HF30786	-/-/-/-	4	3	HF08267/HF43699/HF30786	1	HF28734
MF	GO:0008565	protein transporter activity	1/963	18/16669	0.657576	0.999577	novel.2754	-	1	1	novel.2754	0
MF	GO:0016892	endoribonuclease activity, producing 3'-phosphomonoesters	1/963	18/16669	0.657576	0.999577	HF40002	-	1	0		1	HF40002
MF	GO:0016894	endonuclease activity, active with either ribo- or deoxyribonucleic acids and producing 3'-phosphomonoesters	1/963	18/16669	0.657576	0.999577	HF40002	-	1	0		1	HF40002
MF	GO:0019203	carbohydrate phosphatase activity	1/963	18/16669	0.657576	0.999577	HF25316	-	1	1	HF25316	0
MF	GO:0035091	phosphatidylinositol binding	1/963	18/16669	0.657576	0.999577	HF29697	-	1	0		1	HF29697
MF	GO:0050308	sugar-phosphatase activity	1/963	18/16669	0.657576	0.999577	HF25316	-	1	1	HF25316	0
MF	GO:0003690	double-stranded DNA binding	4/963	78/16669	0.666892	0.999577	HF28512/HF41112/HF06765/HF28727	-/-/-/-	4	3	HF28512/HF06765/HF28727	1	HF41112
MF	GO:0051537	2 iron, 2 sulfur cluster binding	1/963	19/16669	0.67738	0.999577	HF21287	-	1	1	HF21287	0
MF	GO:0022804	active transmembrane transporter activity	13/963	250/16669	0.692106	0.999577	HF37826/HF25447/HF04077/HF35138/HF03357/HF35144/HF36534/HF36533/HF30620/HF31992/HF30631/HF26339/HF15075	-/-/-/-/-/-/-/-/-/-/-/-/-	13	10	HF37826/HF25447/HF35138/HF03357/HF35144/HF36534/HF36533/HF30631/HF26339/HF15075	3	HF04077/HF30620/HF31992
MF	GO:0003678	DNA helicase activity	1/963	20/16669	0.696039	0.999577	novel.3057	-	1	1	novel.3057	0
MF	GO:0003746	translation elongation factor activity	1/963	21/16669	0.713621	0.999577	HF14472	-	1	0		1	HF14472
MF	GO:0008047	enzyme activator activity	2/963	43/16669	0.718944	0.999577	HF11725/HF30918	-/-	2	2	HF11725/HF30918	0
MF	GO:0008017	microtubule binding	6/963	123/16669	0.721341	0.999577	HF16401/HF38275/HF12369/HF19401/HF05088/HF27091	-/-/-/-/-/-	6	2	HF12369/HF05088	4	HF16401/HF38275/HF19401/HF27091
MF	GO:0030599	pectinesterase activity	3/963	64/16669	0.72321	0.999577	HF07918/HF28911/HF13495	-/-/-	3	0		3	HF07918/HF28911/HF13495
MF	GO:0016861	intramolecular oxidoreductase activity, interconverting aldoses and ketoses	1/963	22/16669	0.730186	0.999577	HF34273	-	1	0		1	HF34273
MF	GO:0034062	5'-3' RNA polymerase activity	4/963	86/16669	0.739533	0.999577	HF28734/HF08267/HF43699/HF30786	-/-/-/-	4	3	HF08267/HF43699/HF30786	1	HF28734
MF	GO:0097747	RNA polymerase activity	4/963	86/16669	0.739533	0.999577	HF28734/HF08267/HF43699/HF30786	-/-/-/-	4	3	HF08267/HF43699/HF30786	1	HF28734
MF	GO:0004497	monooxygenase activity	2/963	45/16669	0.742118	0.999577	HF09320/HF21287	-/-	2	1	HF21287	1	HF09320
MF	GO:0008237	metallopeptidase activity	3/963	66/16669	0.742387	0.999577	HF33184/HF38817/HF25341	-/-/-	3	1	HF33184	2	HF38817/HF25341
MF	GO:0051082	unfolded protein binding	3/963	66/16669	0.742387	0.999577	HF25885/HF42298/HF23507	-/-/-	3	2	HF25885/HF23507	1	HF42298
MF	GO:0015631	tubulin binding	6/963	126/16669	0.742499	0.999577	HF16401/HF38275/HF12369/HF19401/HF05088/HF27091	-/-/-/-/-/-	6	2	HF12369/HF05088	4	HF16401/HF38275/HF19401/HF27091
MF	GO:0004499	N,N-dimethylaniline monooxygenase activity	1/963	23/16669	0.745795	0.999577	HF09320	-	1	0		1	HF09320
MF	GO:1901681	sulfur compound binding	1/963	23/16669	0.745795	0.999577	novel.1238	-	1	1	novel.1238	0
MF	GO:0050660	flavin adenine dinucleotide binding	7/963	147/16669	0.752108	0.999577	HF11706/novel.449/HF11708/HF11697/HF09320/HF34282/HF30727	-/-/-/-/-/-/-	7	5	novel.449/HF11708/HF11697/HF34282/HF30727	2	HF11706/HF09320
MF	GO:0003779	actin binding	2/963	46/16669	0.75308	0.999577	HF24461/novel.1625	-/-	2	2	HF24461/novel.1625	0
MF	GO:0042626	ATPase activity, coupled to transmembrane movement of substances	4/963	88/16669	0.755687	0.999577	HF03357/HF30620/HF31992/HF26339	-/-/-/-	4	2	HF03357/HF26339	2	HF30620/HF31992
MF	GO:0043492	ATPase activity, coupled to movement of substances	4/963	88/16669	0.755687	0.999577	HF03357/HF30620/HF31992/HF26339	-/-/-/-	4	2	HF03357/HF26339	2	HF30620/HF31992
MF	GO:0016887	ATPase activity	11/963	225/16669	0.757618	0.999577	HF05224/HF03225/HF36483/HF05220/HF03357/HF26360/HF40940/HF30620/HF15748/HF31992/HF26339	-/-/-/-/-/-/-/-/-/-/-	11	7	HF05224/HF03225/HF05220/HF03357/HF26360/HF15748/HF26339	4	HF36483/HF40940/HF30620/HF31992
MF	GO:0016645	oxidoreductase activity, acting on the CH-NH group of donors	1/963	24/16669	0.760501	0.999577	HF30727	-	1	1	HF30727	0
MF	GO:0008234	cysteine-type peptidase activity	5/963	109/16669	0.761879	0.999577	novel.3483/novel.1289/HF43512/novel.2097/HF15738	-/-/-/-/-	5	5	novel.3483/novel.1289/HF43512/novel.2097/HF15738	0
MF	GO:0046982	protein heterodimerization activity	5/963	109/16669	0.761879	0.999577	HF44438/HF01208/HF11588/HF28869/HF33209	-/-/-/-/-	5	2	HF01208/HF11588	3	HF44438/HF28869/HF33209
MF	GO:0016831	carboxy-lyase activity	2/963	47/16669	0.763637	0.999577	HF34876/HF17404	-/-	2	0		2	HF34876/HF17404
MF	GO:0004540	ribonuclease activity	2/963	48/16669	0.7738	0.999577	novel.1645/HF40002	-/-	2	0		2	novel.1645/HF40002
MF	GO:0016810	hydrolase activity, acting on carbon-nitrogen (but not peptide) bonds	2/963	48/16669	0.7738	0.999577	HF05884/HF05137	-/-	2	0		2	HF05884/HF05137
MF	GO:0005085	guanyl-nucleotide exchange factor activity	1/963	25/16669	0.774357	0.999577	novel.1147	-	1	1	novel.1147	0
MF	GO:0005342	organic acid transmembrane transporter activity	1/963	25/16669	0.774357	0.999577	HF01213	-	1	1	HF01213	0
MF	GO:0015171	amino acid transmembrane transporter activity	1/963	25/16669	0.774357	0.999577	HF01213	-	1	1	HF01213	0
MF	GO:0046943	carboxylic acid transmembrane transporter activity	1/963	25/16669	0.774357	0.999577	HF01213	-	1	1	HF01213	0
MF	GO:0008092	cytoskeletal protein binding	8/963	172/16669	0.783421	0.999577	HF24461/HF16401/HF38275/HF12369/HF19401/HF05088/HF27091/novel.1625	-/-/-/-/-/-/-/-	8	4	HF24461/HF12369/HF05088/novel.1625	4	HF16401/HF38275/HF19401/HF27091
MF	GO:0016765	transferase activity, transferring alkyl or aryl (other than methyl) groups	2/963	49/16669	0.78358	0.999577	HF40154/HF27127	-/-	2	2	HF40154/HF27127	0
MF	GO:0016879	ligase activity, forming carbon-nitrogen bonds	2/963	49/16669	0.78358	0.999577	HF01484/HF10899	-/-	2	0		2	HF01484/HF10899
MF	GO:0016860	intramolecular oxidoreductase activity	1/963	26/16669	0.787413	0.999577	HF34273	-	1	0		1	HF34273
MF	GO:0005509	calcium ion binding	12/963	252/16669	0.794087	0.999577	HF41775/HF23421/HF13643/HF40750/HF28950/HF20982/HF06997/HF10630/HF13016/HF35703/HF03517/HF08414	-/-/-/-/-/-/-/-/-/-/-/-	12	8	HF41775/HF23421/HF13643/HF28950/HF20982/HF10630/HF13016/HF03517	4	HF40750/HF06997/HF35703/HF08414
MF	GO:0060589	nucleoside-triphosphatase regulator activity	2/963	51/16669	0.802028	0.999577	HF11725/novel.3351	-/-	2	2	HF11725/novel.3351	0
MF	GO:0009055	electron transfer activity	8/963	176/16669	0.803981	0.999577	HF40087/HF02841/HF41712/HF03268/HF32618/HF30402/HF18546/HF18049	-/-/-/-/-/-/-/-	8	4	HF40087/HF02841/HF18546/HF18049	4	HF41712/HF03268/HF32618/HF30402
MF	GO:0015399	primary active transmembrane transporter activity	4/963	95/16669	0.806153	0.999577	HF03357/HF30620/HF31992/HF26339	-/-/-/-	4	2	HF03357/HF26339	2	HF30620/HF31992
MF	GO:0015405	P-P-bond-hydrolysis-driven transmembrane transporter activity	4/963	95/16669	0.806153	0.999577	HF03357/HF30620/HF31992/HF26339	-/-/-/-	4	2	HF03357/HF26339	2	HF30620/HF31992
MF	GO:0016830	carbon-carbon lyase activity	3/963	74/16669	0.808672	0.999577	HF34876/HF17404/HF25341	-/-/-	3	0		3	HF34876/HF17404/HF25341
MF	GO:0008514	organic anion transmembrane transporter activity	1/963	28/16669	0.811303	0.999577	HF01213	-	1	1	HF01213	0
MF	GO:0004842	ubiquitin-protein transferase activity	5/963	117/16669	0.813097	0.999577	HF42782/HF36171/HF42005/HF43842/HF19002	-/-/-/-/-	5	3	HF42782/HF36171/HF19002	2	HF42005/HF43842
MF	GO:0019787	ubiquitin-like protein transferase activity	5/963	117/16669	0.813097	0.999577	HF42782/HF36171/HF42005/HF43842/HF19002	-/-/-/-/-	5	3	HF42782/HF36171/HF19002	2	HF42005/HF43842
MF	GO:0004386	helicase activity	2/963	54/16669	0.827083	0.999577	novel.3057/HF42372	-/-	2	1	novel.3057	1	HF42372
MF	GO:0008378	galactosyltransferase activity	1/963	31/16669	0.842205	0.999577	HF07435	-	1	0		1	HF07435
MF	GO:0015079	potassium ion transmembrane transporter activity	1/963	31/16669	0.842205	0.999577	HF42571	-	1	0		1	HF42571
MF	GO:0008081	phosphoric diester hydrolase activity	1/963	32/16669	0.851338	0.999577	HF32922	-	1	1	HF32922	0
MF	GO:0005096	GTPase activator activity	1/963	33/16669	0.859943	0.999577	HF11725	-	1	1	HF11725	0
MF	GO:0003777	microtubule motor activity	4/963	106/16669	0.868013	0.999577	HF16401/HF38275/HF19401/HF05088	-/-/-/-	4	1	HF05088	3	HF16401/HF38275/HF19401
MF	GO:0016903	oxidoreductase activity, acting on the aldehyde or oxo group of donors	1/963	34/16669	0.86805	0.999577	HF06761	-	1	0		1	HF06761
MF	GO:0017016	Ras GTPase binding	1/963	34/16669	0.86805	0.999577	novel.1147	-	1	1	novel.1147	0
MF	GO:0031267	small GTPase binding	1/963	34/16669	0.86805	0.999577	novel.1147	-	1	1	novel.1147	0
MF	GO:0010181	FMN binding	1/963	36/16669	0.882886	0.999577	HF05283	-	1	0		1	HF05283
MF	GO:0016709	oxidoreductase activity, acting on paired donors, with incorporation or reduction of molecular oxygen, NAD(P)H as one donor, and incorporation of one atom of oxygen	1/963	36/16669	0.882886	0.999577	HF09320	-	1	0		1	HF09320
MF	GO:0004298	threonine-type endopeptidase activity	1/963	37/16669	0.889666	0.999577	HF19575	-	1	0		1	HF19575
MF	GO:0070003	threonine-type peptidase activity	1/963	37/16669	0.889666	0.999577	HF19575	-	1	0		1	HF19575
MF	GO:0008194	UDP-glycosyltransferase activity	5/963	136/16669	0.899755	0.999577	HF39844/HF24599/HF30851/HF39842/HF36979	-/-/-/-/-	5	1	HF36979	4	HF39844/HF24599/HF30851/HF39842
MF	GO:0004521	endoribonuclease activity	1/963	39/16669	0.902074	0.999577	HF40002	-	1	0		1	HF40002
MF	GO:0016779	nucleotidyltransferase activity	6/963	162/16669	0.912059	0.999577	HF01798/HF28734/HF08267/HF32196/HF43699/HF30786	-/-/-/-/-/-	6	4	HF08267/HF32196/HF43699/HF30786	2	HF01798/HF28734
MF	GO:0030695	GTPase regulator activity	1/963	41/16669	0.913087	0.999577	HF11725	-	1	1	HF11725	0
MF	GO:0016866	intramolecular transferase activity	1/963	44/16669	0.927331	0.999577	HF41526	-	1	1	HF41526	0
MF	GO:0051020	GTPase binding	1/963	44/16669	0.927331	0.999577	novel.1147	-	1	1	novel.1147	0
MF	GO:0001883	purine nucleoside binding	11/963	278/16669	0.932148	0.999577	novel.2730/HF25107/HF19903/HF22590/HF35055/HF14792/HF07296/novel.1149/HF32144/HF07298/HF42021	-/-/-/-/-/-/-/-/-/-/-	11	4	HF22590/HF35055/novel.1149/HF32144	7	novel.2730/HF25107/HF19903/HF14792/HF07296/HF07298/HF42021
MF	GO:0005525	GTP binding	11/963	278/16669	0.932148	0.999577	novel.2730/HF25107/HF19903/HF22590/HF35055/HF14792/HF07296/novel.1149/HF32144/HF07298/HF42021	-/-/-/-/-/-/-/-/-/-/-	11	4	HF22590/HF35055/novel.1149/HF32144	7	novel.2730/HF25107/HF19903/HF14792/HF07296/HF07298/HF42021
MF	GO:0032549	ribonucleoside binding	11/963	278/16669	0.932148	0.999577	novel.2730/HF25107/HF19903/HF22590/HF35055/HF14792/HF07296/novel.1149/HF32144/HF07298/HF42021	-/-/-/-/-/-/-/-/-/-/-	11	4	HF22590/HF35055/novel.1149/HF32144	7	novel.2730/HF25107/HF19903/HF14792/HF07296/HF07298/HF42021
MF	GO:0032550	purine ribonucleoside binding	11/963	278/16669	0.932148	0.999577	novel.2730/HF25107/HF19903/HF22590/HF35055/HF14792/HF07296/novel.1149/HF32144/HF07298/HF42021	-/-/-/-/-/-/-/-/-/-/-	11	4	HF22590/HF35055/novel.1149/HF32144	7	novel.2730/HF25107/HF19903/HF14792/HF07296/HF07298/HF42021
MF	GO:0032561	guanyl ribonucleotide binding	11/963	278/16669	0.932148	0.999577	novel.2730/HF25107/HF19903/HF22590/HF35055/HF14792/HF07296/novel.1149/HF32144/HF07298/HF42021	-/-/-/-/-/-/-/-/-/-/-	11	4	HF22590/HF35055/novel.1149/HF32144	7	novel.2730/HF25107/HF19903/HF14792/HF07296/HF07298/HF42021
MF	GO:0003924	GTPase activity	2/963	74/16669	0.932676	0.999577	HF19903/HF42021	-/-	2	0		2	HF19903/HF42021
MF	GO:0001882	nucleoside binding	11/963	280/16669	0.935733	0.999577	novel.2730/HF25107/HF19903/HF22590/HF35055/HF14792/HF07296/novel.1149/HF32144/HF07298/HF42021	-/-/-/-/-/-/-/-/-/-/-	11	4	HF22590/HF35055/novel.1149/HF32144	7	novel.2730/HF25107/HF19903/HF14792/HF07296/HF07298/HF42021
MF	GO:0042623	ATPase activity, coupled	4/963	126/16669	0.937864	0.999577	HF03357/HF30620/HF31992/HF26339	-/-/-/-	4	2	HF03357/HF26339	2	HF30620/HF31992
MF	GO:0003774	motor activity	4/963	127/16669	0.940256	0.999577	HF16401/HF38275/HF19401/HF05088	-/-/-/-	4	1	HF05088	3	HF16401/HF38275/HF19401
MF	GO:0052689	carboxylic ester hydrolase activity	3/963	104/16669	0.944068	0.999577	HF07918/HF28911/HF13495	-/-/-	3	0		3	HF07918/HF28911/HF13495
MF	GO:0004519	endonuclease activity	1/963	49/16669	0.946078	0.999577	HF40002	-	1	0		1	HF40002
MF	GO:0019001	guanyl nucleotide binding	11/963	287/16669	0.947023	0.999577	novel.2730/HF25107/HF19903/HF22590/HF35055/HF14792/HF07296/novel.1149/HF32144/HF07298/HF42021	-/-/-/-/-/-/-/-/-/-/-	11	4	HF22590/HF35055/novel.1149/HF32144	7	novel.2730/HF25107/HF19903/HF14792/HF07296/HF07298/HF42021
MF	GO:0003755	peptidyl-prolyl cis-trans isomerase activity	1/963	50/16669	0.949203	0.999577	HF25354	-	1	0		1	HF25354
MF	GO:0016859	cis-trans isomerase activity	1/963	50/16669	0.949203	0.999577	HF25354	-	1	0		1	HF25354
MF	GO:0003743	translation initiation factor activity	1/963	51/16669	0.952146	0.999577	HF04322	-	1	0		1	HF04322
MF	GO:0140098	catalytic activity, acting on RNA	11/963	292/16669	0.953988	0.999577	HF11614/HF11599/HF28734/HF08267/HF26691/novel.1645/HF08439/HF43699/HF25051/HF30786/HF40002	-/-/-/-/-/-/-/-/-/-/-	11	4	HF08267/HF08439/HF43699/HF30786	7	HF11614/HF11599/HF28734/HF26691/novel.1645/HF25051/HF40002
MF	GO:0008135	translation factor activity, RNA binding	2/963	82/16669	0.954553	0.999577	HF14472/HF04322	-/-	2	0		2	HF14472/HF04322
MF	GO:0003735	structural constituent of ribosome	17/963	419/16669	0.95493	0.999577	HF41626/HF22066/novel.3632/HF26615/HF06975/HF26952/HF11728/HF34001/HF39472/HF43038/HF26427/HF24948/HF32959/HF43086/HF02468/HF02543/HF39809	-/-/-/-/-/-/-/-/-/-/-/-/-/-/-/-/-	17	10	HF41626/HF22066/HF26952/HF11728/HF34001/HF39472/HF26427/HF24948/HF02543/HF39809	7	novel.3632/HF26615/HF06975/HF43038/HF32959/HF43086/HF02468
MF	GO:0008324	cation transmembrane transporter activity	9/963	254/16669	0.961134	0.999577	HF25447/HF11571/HF39705/HF21234/HF33974/HF15502/HF42571/HF25617/HF04181	-/-/-/-/-/-/-/-/-	9	5	HF25447/HF21234/HF15502/HF25617/HF04181	4	HF11571/HF39705/HF33974/HF42571
MF	GO:0005198	structural molecule activity	18/963	447/16669	0.962263	0.999577	HF41626/HF22066/novel.3632/HF26615/HF06975/HF26952/HF11728/HF34001/HF39472/HF23181/HF43038/HF26427/HF24948/HF32959/HF43086/HF02468/HF02543/HF39809	-/-/-/-/-/-/-/-/-/-/-/-/-/-/-/-/-/-	18	11	HF41626/HF22066/HF26952/HF11728/HF34001/HF39472/HF23181/HF26427/HF24948/HF02543/HF39809	7	novel.3632/HF26615/HF06975/HF43038/HF32959/HF43086/HF02468
MF	GO:0005543	phospholipid binding	1/963	55/16669	0.962312	0.999577	HF29697	-	1	0		1	HF29697
MF	GO:0017111	nucleoside-triphosphatase activity	19/963	469/16669	0.963452	0.999577	HF05224/HF03225/HF36483/HF16401/HF38275/HF05220/HF19903/novel.3057/HF03357/HF26360/HF42372/HF19401/HF40940/HF05088/HF30620/HF15748/HF42021/HF31992/HF26339	-/-/-/-/-/-/-/-/-/-/-/-/-/-/-/-/-/-/-	19	9	HF05224/HF03225/HF05220/novel.3057/HF03357/HF26360/HF05088/HF15748/HF26339	10	HF36483/HF16401/HF38275/HF19903/HF42372/HF19401/HF40940/HF30620/HF42021/HF31992
MF	GO:0015298	solute:cation antiporter activity	1/963	56/16669	0.964496	0.999577	HF25447	-	1	1	HF25447	0
MF	GO:0015299	solute:proton antiporter activity	1/963	56/16669	0.964496	0.999577	HF25447	-	1	1	HF25447	0
MF	GO:0008375	acetylglucosaminyltransferase activity	1/963	60/16669	0.972041	0.999577	HF24599	-	1	0		1	HF24599
MF	GO:0004812	aminoacyl-tRNA ligase activity	2/963	93/16669	0.973816	0.999577	HF11614/HF11599	-/-	2	0		2	HF11614/HF11599
MF	GO:0016875	ligase activity, forming carbon-oxygen bonds	2/963	93/16669	0.973816	0.999577	HF11614/HF11599	-/-	2	0		2	HF11614/HF11599
MF	GO:0008289	lipid binding	3/963	122/16669	0.974898	0.999577	HF09911/HF29697/HF43813	-/-/-	3	1	HF43813	2	HF09911/HF29697
MF	GO:0022890	inorganic cation transmembrane transporter activity	7/963	224/16669	0.976968	0.999577	HF25447/HF11571/HF21234/HF33974/HF42571/HF25617/HF04181	-/-/-/-/-/-/-	7	4	HF25447/HF21234/HF25617/HF04181	3	HF11571/HF33974/HF42571
MF	GO:0016462	pyrophosphatase activity	19/963	488/16669	0.977075	0.999577	HF05224/HF03225/HF36483/HF16401/HF38275/HF05220/HF19903/novel.3057/HF03357/HF26360/HF42372/HF19401/HF40940/HF05088/HF30620/HF15748/HF42021/HF31992/HF26339	-/-/-/-/-/-/-/-/-/-/-/-/-/-/-/-/-/-/-	19	9	HF05224/HF03225/HF05220/novel.3057/HF03357/HF26360/HF05088/HF15748/HF26339	10	HF36483/HF16401/HF38275/HF19903/HF42372/HF19401/HF40940/HF30620/HF42021/HF31992
MF	GO:0016410	N-acyltransferase activity	1/963	64/16669	0.977983	0.999577	novel.217	-	1	0		1	novel.217
MF	GO:0051536	iron-sulfur cluster binding	2/963	98/16669	0.979694	0.999577	HF21287/HF04035	-/-	2	2	HF21287/HF04035	0
MF	GO:0051540	metal cluster binding	2/963	98/16669	0.979694	0.999577	HF21287/HF04035	-/-	2	2	HF21287/HF04035	0
MF	GO:0016853	isomerase activity	5/963	182/16669	0.982109	0.999577	HF25354/HF34273/novel.157/HF41526/HF14442	-/-/-/-/-	5	3	novel.157/HF41526/HF14442	2	HF25354/HF34273
MF	GO:0016818	hydrolase activity, acting on acid anhydrides, in phosphorus-containing anhydrides	19/963	499/16669	0.982694	0.999577	HF05224/HF03225/HF36483/HF16401/HF38275/HF05220/HF19903/novel.3057/HF03357/HF26360/HF42372/HF19401/HF40940/HF05088/HF30620/HF15748/HF42021/HF31992/HF26339	-/-/-/-/-/-/-/-/-/-/-/-/-/-/-/-/-/-/-	19	9	HF05224/HF03225/HF05220/novel.3057/HF03357/HF26360/HF05088/HF15748/HF26339	10	HF36483/HF16401/HF38275/HF19903/HF42372/HF19401/HF40940/HF30620/HF42021/HF31992
MF	GO:0019899	enzyme binding	1/963	73/16669	0.987142	0.999577	novel.1147	-	1	1	novel.1147	0
MF	GO:0016874	ligase activity	4/963	178/16669	0.99308	0.999577	HF01484/HF11614/HF11599/HF10899	-/-/-/-	4	0		4	HF01484/HF11614/HF11599/HF10899
MF	GO:0003723	RNA binding	15/963	461/16669	0.995849	0.999577	HF41626/novel.1238/HF32196/HF40506/HF14767/HF14472/HF26691/HF04322/HF39622/HF37815/HF26427/HF24948/HF25051/HF39681/HF40002	-/-/-/-/-/-/-/-/-/-/-/-/-/-/-	15	8	HF41626/novel.1238/HF32196/HF14767/HF39622/HF37815/HF26427/HF24948	7	HF40506/HF14472/HF26691/HF04322/HF25051/HF39681/HF40002
MF	GO:0140101	catalytic activity, acting on a tRNA	2/963	145/16669	0.998283	0.999577	HF11614/HF11599	-/-	2	0		2	HF11614/HF11599
MF	GO:0015077	monovalent inorganic cation transmembrane transporter activity	2/963	161/16669	0.999278	0.999577	HF25447/HF42571	-/-	2	1	HF25447	1	HF42571
MF	GO:0015078	proton transmembrane transporter activity	1/963	130/16669	0.999577	0.999577	HF25447	-	1	1	HF25447	0

## Sheet: 1Cvs2C_all_GOenrich_significant
Category	GOID	Description	GeneRatio	BgRatio	pvalue	padj	geneID	geneName	Count	Up	Up_Gene_id	Down	Down_Gene_id
MF	GO:0005506	iron ion binding	47/963	339/16669	2.11253e-08	6.25308e-06	HF32232/HF32231/HF26931/HF24647/HF32233/novel.3075/novel.278/HF08054/HF39957/novel.1400/HF24656/HF42779/HF37818/novel.2976/novel.1315/HF32543/novel.576/HF29781/HF39985/novel.2251/HF42312/HF25881/novel.3097/HF23672/HF21572/HF08914/novel.3067/HF35281/HF40721/HF23544/HF16862/HF08475/HF04517/HF42775/HF42780/HF24645/novel.1398/HF19028/HF13390/novel.3490/HF13468/HF39986/HF29780/HF00377/HF21098/HF04035/…	-/-/-/-/-/-/-/-/-/-/-/-/-/-/-/-/-/-/-/-/-/-/-/-/-/-/-/-/-/-/-/-/-/-/-/-/-/-/-/-/-/-/-/-/-/-/-	47	28	HF32232/HF32231/HF32233/HF08054/novel.1400/HF24656/HF37818/novel.1315/novel.576/HF29781/HF39985/HF42312/HF25881/novel.3097/HF23672/HF08914/HF40721/HF16862/HF08475/novel.1398/HF19028/novel.3490/HF13468/HF39986/HF29780/HF21098/HF04035/HF09057	19	HF26931/HF24647/novel.3075/novel.278/HF39957/HF42779/novel.2976/HF32543/novel.2251/HF21572/novel.3067/HF35281/HF23544/HF04517/HF42775/HF42780/HF24645/HF13390/HF00377
MF	GO:0016705	oxidoreductase activity, acting on paired donors, with incorporation or reduction of molecular oxygen	46/963	345/16669	9.81872e-08	1.22141e-05	HF32232/HF32231/HF24647/HF32233/novel.3075/HF08054/HF39957/novel.1400/HF24656/HF42779/novel.551/HF40113/novel.2976/novel.1315/HF32543/novel.576/HF29781/HF39985/novel.2251/HF42312/novel.3097/HF23672/HF23957/HF21572/HF08914/HF09320/novel.3067/HF35281/HF40721/HF23544/HF16862/HF04517/HF42775/HF42780/HF24645/novel.1398/HF19028/HF13390/novel.3490/HF13468/HF40115/HF39986/HF29780/HF00377/HF21098/HF09057	-/-/-/-/-/-/-/-/-/-/-/-/-/-/-/-/-/-/-/-/-/-/-/-/-/-/-/-/-/-/-/-/-/-/-/-/-/-/-/-/-/-/-/-/-/-	46	27	HF32232/HF32231/HF32233/HF08054/novel.1400/HF24656/novel.551/novel.1315/novel.576/HF29781/HF39985/HF42312/novel.3097/HF23672/HF23957/HF08914/HF40721/HF16862/novel.1398/HF19028/novel.3490/HF13468/HF40115/HF39986/HF29780/HF21098/HF09057	19	HF24647/novel.3075/HF39957/HF42779/HF40113/novel.2976/HF32543/novel.2251/HF21572/HF09320/novel.3067/HF35281/HF23544/HF04517/HF42775/HF42780/HF24645/HF13390/HF00377
MF	GO:0020037	heme binding	52/963	419/16669	1.52925e-07	1.22141e-05	HF32232/HF32231/HF24647/HF32233/novel.3075/HF08054/HF39957/novel.1400/HF24656/HF40774/HF42779/HF18566/HF02241/novel.2976/novel.1315/HF32543/novel.576/HF29781/HF39985/novel.2251/HF42312/novel.3097/HF23619/HF39717/HF23672/HF21572/HF08914/novel.3067/HF43040/HF35281/HF40721/HF23544/HF16862/HF04517/HF42775/HF42780/HF24645/novel.1398/HF39725/HF19028/HF13390/novel.3490/HF26468/HF13468/HF01608/HF42276/HF…	-/-/-/-/-/-/-/-/-/-/-/-/-/-/-/-/-/-/-/-/-/-/-/-/-/-/-/-/-/-/-/-/-/-/-/-/-/-/-/-/-/-/-/-/-/-/-/-/-/-/-/-	52	33	HF32232/HF32231/HF32233/HF08054/novel.1400/HF24656/HF40774/HF18566/HF02241/novel.1315/novel.576/HF29781/HF39985/HF42312/novel.3097/HF23619/HF23672/HF08914/HF43040/HF40721/HF16862/novel.1398/HF19028/novel.3490/HF26468/HF13468/HF01608/HF42276/HF39986/HF25735/HF29780/HF21098/HF09057	19	HF24647/novel.3075/HF39957/HF42779/novel.2976/HF32543/novel.2251/HF39717/HF21572/novel.3067/HF35281/HF23544/HF04517/HF42775/HF42780/HF24645/HF39725/HF13390/HF00377
MF	GO:0046906	tetrapyrrole binding	52/963	420/16669	1.65056e-07	1.22141e-05	HF32232/HF32231/HF24647/HF32233/novel.3075/HF08054/HF39957/novel.1400/HF24656/HF40774/HF42779/HF18566/HF02241/novel.2976/novel.1315/HF32543/novel.576/HF29781/HF39985/novel.2251/HF42312/novel.3097/HF23619/HF39717/HF23672/HF21572/HF08914/novel.3067/HF43040/HF35281/HF40721/HF23544/HF16862/HF04517/HF42775/HF42780/HF24645/novel.1398/HF39725/HF19028/HF13390/novel.3490/HF26468/HF13468/HF01608/HF42276/HF…	-/-/-/-/-/-/-/-/-/-/-/-/-/-/-/-/-/-/-/-/-/-/-/-/-/-/-/-/-/-/-/-/-/-/-/-/-/-/-/-/-/-/-/-/-/-/-/-/-/-/-/-	52	33	HF32232/HF32231/HF32233/HF08054/novel.1400/HF24656/HF40774/HF18566/HF02241/novel.1315/novel.576/HF29781/HF39985/HF42312/novel.3097/HF23619/HF23672/HF08914/HF43040/HF40721/HF16862/novel.1398/HF19028/novel.3490/HF26468/HF13468/HF01608/HF42276/HF39986/HF25735/HF29780/HF21098/HF09057	19	HF24647/novel.3075/HF39957/HF42779/novel.2976/HF32543/novel.2251/HF39717/HF21572/novel.3067/HF35281/HF23544/HF04517/HF42775/HF42780/HF24645/HF39725/HF13390/HF00377
MF	GO:0043531	ADP binding	25/963	196/16669	0.00016503	0.00976978	HF40000/novel.350/novel.616/HF31157/novel.1097/HF40212/novel.2239/HF43815/novel.475/HF18886/HF36256/HF18927/HF43603/HF21525/novel.2248/HF34397/HF40216/HF40152/HF14485/novel.3652/HF34470/HF21906/HF28610/HF21520/HF28609	-/-/-/-/-/-/-/-/-/-/-/-/-/-/-/-/-/-/-/-/-/-/-/-/-	25	10	HF40000/novel.350/novel.616/HF31157/HF43815/novel.475/HF18886/HF21525/novel.3652/HF34470	15	novel.1097/HF40212/novel.2239/HF36256/HF18927/HF43603/novel.2248/HF34397/HF40216/HF40152/HF14485/HF21906/HF28610/HF21520/HF28609
MF	GO:0010333	terpene synthase activity	8/963	35/16669	0.000701142	0.0345897	HF12196/HF03677/HF41479/HF17847/novel.1786/HF22080/HF37663/HF37664	-/-/-/-/-/-/-/-	8	5	HF12196/HF03677/HF17847/novel.1786/HF22080	3	HF41479/HF37663/HF37664

## Sheet: 1Cvs3C_all_GOenrich
Category	GOID	Description	GeneRatio	BgRatio	pvalue	padj	geneID	geneName	Count	Up	Up_Gene_id	Down	Down_Gene_id
BP	GO:0015074	DNA integration	31/1994	66/11133	5.26502e-08	3.05371e-05	novel.369/novel.3247/novel.2503/novel.1954/novel.976/novel.1225/novel.2168/novel.2665/novel.1882/novel.1065/novel.3417/novel.3049/novel.1804/novel.3436/novel.343/novel.1283/novel.1234/novel.2926/novel.2899/novel.2361/novel.417/novel.445/novel.3728/novel.2342/novel.1737/novel.2444/novel.1521/novel.281/novel.3061/novel.2090/novel.2108	-/-/-/-/-/-/-/-/-/-/-/-/-/-/-/-/-/-/-/-/-/-/-/-/-/-/-/-/-/-/-	31	23	novel.369/novel.976/novel.2168/novel.2665/novel.1882/novel.3417/novel.3049/novel.1804/novel.3436/novel.343/novel.1283/novel.1234/novel.2926/novel.2899/novel.417/novel.445/novel.2342/novel.1737/novel.2444/novel.1521/novel.281/novel.2090/novel.2108	8	novel.3247/novel.2503/novel.1954/novel.1225/novel.1065/novel.2361/novel.3728/novel.3061
BP	GO:0009733	response to auxin	28/1994	67/11133	4.2281e-06	0.00122615	HF02646/HF00533/HF39607/HF19339/HF39605/HF22857/HF02641/HF39603/HF02642/HF39604/HF02632/HF10354/HF02629/HF13569/HF19076/HF10355/HF12854/HF02644/HF06124/HF02638/HF28531/HF10364/HF02633/HF22293/HF21034/HF36417/novel.917/HF02639	-/-/-/-/-/-/-/-/-/-/-/-/-/-/-/-/-/-/-/-/-/-/-/-/-/-/-/-	28	25	HF02646/HF00533/HF39607/HF19339/HF39605/HF22857/HF02641/HF39603/HF02642/HF39604/HF02632/HF10354/HF02629/HF13569/HF19076/HF10355/HF12854/HF02644/HF02638/HF28531/HF02633/HF22293/HF36417/novel.917/HF02639	3	HF06124/HF10364/HF21034
BP	GO:0042221	response to chemical	60/1994	197/11133	1.06005e-05	0.00204943	HF09067/HF27668/HF23526/HF19931/HF02646/HF41764/HF04077/HF00533/HF39607/HF30834/HF41384/HF22347/HF19339/novel.2473/HF17751/HF39605/HF22857/HF02641/HF39603/HF02642/HF25758/HF39604/HF02632/HF42114/HF15075/HF10354/HF36107/HF25001/HF19057/HF02629/HF13569/HF17508/HF17501/HF19076/HF10355/HF17500/novel.3141/HF21174/HF12008/HF18832/HF12854/HF13813/HF02644/HF06124/HF02638/HF25757/HF28531/HF29111/HF10364/H…	-/-/-/-/-/-/-/-/-/-/-/-/-/-/-/-/-/-/-/-/-/-/-/-/-/-/-/-/-/-/-/-/-/-/-/-/-/-/-/-/-/-/-/-/-/-/-/-/-/-/-/-/-/-/-/-/-/-/-/-	60	31	HF02646/HF41764/HF00533/HF39607/HF19339/HF39605/HF22857/HF02641/HF39603/HF02642/HF25758/HF39604/HF02632/HF10354/HF02629/HF13569/HF17501/HF19076/HF10355/HF17500/HF12854/HF02644/HF02638/HF25757/HF28531/HF29111/HF02633/HF22293/HF36417/novel.917/HF02639	29	HF09067/HF27668/HF23526/HF19931/HF04077/HF30834/HF41384/HF22347/novel.2473/HF17751/HF42114/HF15075/HF36107/HF25001/HF19057/HF17508/novel.3141/HF21174/HF12008/HF18832/HF13813/HF06124/HF10364/HF43138/HF21034/HF07827/HF29068/HF06980/HF01324
BP	GO:0009719	response to endogenous stimulus	33/1994	101/11133	0.000237266	0.0229357	HF02646/HF41764/HF00533/HF39607/HF30834/HF19339/HF39605/HF22857/HF02641/HF39603/HF02642/HF39604/HF02632/HF10354/HF25001/HF19057/HF02629/HF13569/HF19076/HF10355/HF12008/HF12854/HF02644/HF06124/HF02638/HF28531/HF10364/HF02633/HF22293/HF21034/HF36417/novel.917/HF02639	-/-/-/-/-/-/-/-/-/-/-/-/-/-/-/-/-/-/-/-/-/-/-/-/-/-/-/-/-/-/-/-/-	33	26	HF02646/HF41764/HF00533/HF39607/HF19339/HF39605/HF22857/HF02641/HF39603/HF02642/HF39604/HF02632/HF10354/HF02629/HF13569/HF19076/HF10355/HF12854/HF02644/HF02638/HF28531/HF02633/HF22293/HF36417/novel.917/HF02639	7	HF30834/HF25001/HF19057/HF12008/HF06124/HF10364/HF21034
BP	GO:0009725	response to hormone	33/1994	101/11133	0.000237266	0.0229357	HF02646/HF41764/HF00533/HF39607/HF30834/HF19339/HF39605/HF22857/HF02641/HF39603/HF02642/HF39604/HF02632/HF10354/HF25001/HF19057/HF02629/HF13569/HF19076/HF10355/HF12008/HF12854/HF02644/HF06124/HF02638/HF28531/HF10364/HF02633/HF22293/HF21034/HF36417/novel.917/HF02639	-/-/-/-/-/-/-/-/-/-/-/-/-/-/-/-/-/-/-/-/-/-/-/-/-/-/-/-/-/-/-/-/-	33	26	HF02646/HF41764/HF00533/HF39607/HF19339/HF39605/HF22857/HF02641/HF39603/HF02642/HF39604/HF02632/HF10354/HF02629/HF13569/HF19076/HF10355/HF12854/HF02644/HF02638/HF28531/HF02633/HF22293/HF36417/novel.917/HF02639	7	HF30834/HF25001/HF19057/HF12008/HF06124/HF10364/HF21034
BP	GO:0010033	response to organic substance	33/1994	101/11133	0.000237266	0.0229357	HF02646/HF41764/HF00533/HF39607/HF30834/HF19339/HF39605/HF22857/HF02641/HF39603/HF02642/HF39604/HF02632/HF10354/HF25001/HF19057/HF02629/HF13569/HF19076/HF10355/HF12008/HF12854/HF02644/HF06124/HF02638/HF28531/HF10364/HF02633/HF22293/HF21034/HF36417/novel.917/HF02639	-/-/-/-/-/-/-/-/-/-/-/-/-/-/-/-/-/-/-/-/-/-/-/-/-/-/-/-/-/-/-/-/-	33	26	HF02646/HF41764/HF00533/HF39607/HF19339/HF39605/HF22857/HF02641/HF39603/HF02642/HF39604/HF02632/HF10354/HF02629/HF13569/HF19076/HF10355/HF12854/HF02644/HF02638/HF28531/HF02633/HF22293/HF36417/novel.917/HF02639	7	HF30834/HF25001/HF19057/HF12008/HF06124/HF10364/HF21034
BP	GO:0000272	polysaccharide catabolic process	15/1994	39/11133	0.00197458	0.163608	HF37337/HF04141/HF01223/HF17970/HF19497/HF36717/HF30087/HF04121/HF13132/HF04116/HF04150/HF43199/HF36955/HF02052/novel.2945	-/-/-/-/-/-/-/-/-/-/-/-/-/-/-	15	6	HF17970/HF36717/HF30087/HF13132/HF36955/novel.2945	9	HF37337/HF04141/HF01223/HF19497/HF04121/HF04116/HF04150/HF43199/HF02052
BP	GO:0006259	DNA metabolic process	69/1994	284/11133	0.00374792	0.271724	novel.369/novel.3247/novel.2503/HF28478/novel.3057/novel.1954/HF25801/HF28512/HF14203/HF36513/novel.976/HF17984/novel.1225/HF31607/HF23259/novel.2168/HF07244/novel.1842/novel.2665/novel.1882/HF14176/novel.1065/HF33039/novel.3417/novel.3049/HF28471/HF28467/novel.1804/HF21878/HF27087/novel.3436/HF09032/novel.343/novel.1283/novel.1234/HF39563/novel.1920/novel.2926/HF03488/novel.2899/novel.2361/HF087…	-/-/-/-/-/-/-/-/-/-/-/-/-/-/-/-/-/-/-/-/-/-/-/-/-/-/-/-/-/-/-/-/-/-/-/-/-/-/-/-/-/-/-/-/-/-/-/-/-/-/-/-/-/-/-/-/-/-/-/-/-/-/-/-/-/-/-/-/-	69	48	novel.369/novel.3057/HF28512/HF14203/HF36513/novel.976/HF23259/novel.2168/novel.1842/novel.2665/novel.1882/HF33039/novel.3417/novel.3049/HF28471/novel.1804/HF27087/novel.3436/novel.343/novel.1283/novel.1234/novel.1920/novel.2926/HF03488/novel.2899/novel.3593/novel.417/novel.445/HF28499/novel.2342/HF41806/HF30777/novel.1737/HF37582/HF04505/HF17912/novel.2444/HF16835/HF11479/HF34830/HF24555/novel.1…	21	novel.3247/novel.2503/HF28478/novel.1954/HF25801/HF17984/novel.1225/HF31607/HF07244/HF14176/novel.1065/HF28467/HF21878/HF09032/HF39563/novel.2361/HF08790/HF04510/novel.3728/HF01279/novel.3061
BP	GO:0006979	response to oxidative stress	35/1994	128/11133	0.00518918	0.334414	HF01632/HF40774/HF39732/HF40058/HF27337/HF39730/novel.732/HF12664/HF06391/HF21303/HF30422/HF03751/HF18566/HF04768/HF25735/HF36024/HF23619/HF22050/HF10428/HF15570/HF35330/HF39736/HF05384/HF11351/HF02241/HF20770/HF26468/HF33686/HF24555/HF34660/HF31447/HF22867/HF33687/HF06378/HF22563	-/-/-/-/-/-/-/-/-/-/-/-/-/-/-/-/-/-/-/-/-/-/-/-/-/-/-/-/-/-/-/-/-/-/-	35	26	HF40774/HF39732/HF40058/HF27337/HF39730/HF12664/HF06391/HF30422/HF03751/HF18566/HF25735/HF36024/HF23619/HF22050/HF10428/HF15570/HF35330/HF05384/HF02241/HF20770/HF33686/HF24555/HF34660/HF22867/HF06378/HF22563	9	HF01632/novel.732/HF21303/HF04768/HF39736/HF11351/HF26468/HF31447/HF33687
BP	GO:0005976	polysaccharide metabolic process	33/1994	126/11133	0.0127692	0.604256	HF37337/HF00861/HF04141/HF33666/HF01223/HF29041/HF17970/HF19497/HF36717/HF02157/HF29069/HF41998/HF07358/HF30087/HF04121/HF19048/HF13132/HF16214/HF39841/HF17210/HF04116/HF04150/HF17213/HF41760/HF41526/HF43199/HF36955/HF41761/HF02052/novel.2945/HF29450/HF04907/HF02449	-/-/-/-/-/-/-/-/-/-/-/-/-/-/-/-/-/-/-/-/-/-/-/-/-/-/-/-/-/-/-/-/-	33	20	HF00861/HF33666/HF29041/HF17970/HF36717/HF02157/HF41998/HF07358/HF30087/HF13132/HF17210/HF17213/HF41760/HF41526/HF36955/HF41761/novel.2945/HF29450/HF04907/HF02449	13	HF37337/HF04141/HF01223/HF19497/HF29069/HF04121/HF19048/HF16214/HF39841/HF04116/HF04150/HF43199/HF02052
BP	GO:0009607	response to biotic stimulus	14/1994	43/11133	0.0147216	0.604256	HF26545/HF22085/HF43095/HF43097/HF26546/HF42058/HF26540/HF43094/HF32028/HF43101/HF16033/HF42059/HF26536/HF16032	-/-/-/-/-/-/-/-/-/-/-/-/-/-	14	3	HF42058/HF32028/HF43101	11	HF26545/HF22085/HF43095/HF43097/HF26546/HF26540/HF43094/HF16033/HF42059/HF26536/HF16032
BP	GO:0006952	defense response	24/1994	87/11133	0.0165844	0.604256	HF19303/HF32087/HF26545/HF22085/HF40486/HF43095/HF43097/HF26546/HF03311/HF42058/HF26540/HF43094/HF32028/HF04807/HF43101/HF23113/HF16033/HF42059/HF40490/HF01606/HF34256/HF26536/HF03773/HF16032	-/-/-/-/-/-/-/-/-/-/-/-/-/-/-/-/-/-/-/-/-/-/-/-	24	7	HF19303/HF03311/HF42058/HF32028/HF43101/HF01606/HF34256	17	HF32087/HF26545/HF22085/HF40486/HF43095/HF43097/HF26546/HF26540/HF43094/HF04807/HF23113/HF16033/HF42059/HF40490/HF26536/HF03773/HF16032
BP	GO:0001101	response to acid chemical	5/1994	10/11133	0.0208364	0.604256	HF09067/HF27668/HF41384/HF36107/novel.3141	-/-/-/-/-	5	0		5	HF09067/HF27668/HF41384/HF36107/novel.3141
BP	GO:0042168	heme metabolic process	5/1994	10/11133	0.0208364	0.604256	HF38483/HF30423/HF31655/HF13201/HF06680	-/-/-/-/-	5	0		5	HF38483/HF30423/HF31655/HF13201/HF06680
BP	GO:0042816	vitamin B6 metabolic process	5/1994	10/11133	0.0208364	0.604256	HF06210/HF37694/HF15418/HF14104/HF40472	-/-/-/-/-	5	0		5	HF06210/HF37694/HF15418/HF14104/HF40472
BP	GO:0042819	vitamin B6 biosynthetic process	5/1994	10/11133	0.0208364	0.604256	HF06210/HF37694/HF15418/HF14104/HF40472	-/-/-/-/-	5	0		5	HF06210/HF37694/HF15418/HF14104/HF40472
BP	GO:0042822	pyridoxal phosphate metabolic process	5/1994	10/11133	0.0208364	0.604256	HF06210/HF37694/HF15418/HF14104/HF40472	-/-/-/-/-	5	0		5	HF06210/HF37694/HF15418/HF14104/HF40472
BP	GO:0042823	pyridoxal phosphate biosynthetic process	5/1994	10/11133	0.0208364	0.604256	HF06210/HF37694/HF15418/HF14104/HF40472	-/-/-/-/-	5	0		5	HF06210/HF37694/HF15418/HF14104/HF40472
BP	GO:0046184	aldehyde biosynthetic process	5/1994	10/11133	0.0208364	0.604256	HF06210/HF37694/HF15418/HF14104/HF40472	-/-/-/-/-	5	0		5	HF06210/HF37694/HF15418/HF14104/HF40472
BP	GO:1901700	response to oxygen-containing compound	5/1994	10/11133	0.0208364	0.604256	HF09067/HF27668/HF41384/HF36107/novel.3141	-/-/-/-/-	5	0		5	HF09067/HF27668/HF41384/HF36107/novel.3141
BP	GO:0006855	drug transmembrane transport	22/1994	81/11133	0.0251785	0.634936	HF23526/HF19931/HF04077/HF22347/novel.2473/HF17751/HF25758/HF42114/HF15075/HF17508/HF17501/HF17500/HF21174/HF18832/HF13813/HF25757/HF29111/HF43138/HF07827/HF29068/HF06980/HF01324	-/-/-/-/-/-/-/-/-/-/-/-/-/-/-/-/-/-/-/-/-/-	22	5	HF25758/HF17501/HF17500/HF25757/HF29111	17	HF23526/HF19931/HF04077/HF22347/novel.2473/HF17751/HF42114/HF15075/HF17508/HF21174/HF18832/HF13813/HF43138/HF07827/HF29068/HF06980/HF01324
BP	GO:0015893	drug transport	22/1994	81/11133	0.0251785	0.634936	HF23526/HF19931/HF04077/HF22347/novel.2473/HF17751/HF25758/HF42114/HF15075/HF17508/HF17501/HF17500/HF21174/HF18832/HF13813/HF25757/HF29111/HF43138/HF07827/HF29068/HF06980/HF01324	-/-/-/-/-/-/-/-/-/-/-/-/-/-/-/-/-/-/-/-/-/-	22	5	HF25758/HF17501/HF17500/HF25757/HF29111	17	HF23526/HF19931/HF04077/HF22347/novel.2473/HF17751/HF42114/HF15075/HF17508/HF21174/HF18832/HF13813/HF43138/HF07827/HF29068/HF06980/HF01324
BP	GO:0042493	response to drug	22/1994	81/11133	0.0251785	0.634936	HF23526/HF19931/HF04077/HF22347/novel.2473/HF17751/HF25758/HF42114/HF15075/HF17508/HF17501/HF17500/HF21174/HF18832/HF13813/HF25757/HF29111/HF43138/HF07827/HF29068/HF06980/HF01324	-/-/-/-/-/-/-/-/-/-/-/-/-/-/-/-/-/-/-/-/-/-	22	5	HF25758/HF17501/HF17500/HF25757/HF29111	17	HF23526/HF19931/HF04077/HF22347/novel.2473/HF17751/HF42114/HF15075/HF17508/HF21174/HF18832/HF13813/HF43138/HF07827/HF29068/HF06980/HF01324
BP	GO:0042440	pigment metabolic process	8/1994	22/11133	0.0311442	0.752652	novel.2917/HF38483/HF30423/HF31655/HF13201/HF28207/HF05901/HF06680	-/-/-/-/-/-/-/-	8	2	HF28207/HF05901	6	novel.2917/HF38483/HF30423/HF31655/HF13201/HF06680
BP	GO:0006950	response to stress	90/1994	420/11133	0.0341063	0.791266	HF27668/HF21006/HF01632/HF19303/HF32087/HF32496/novel.3057/HF15794/HF25801/HF38097/HF28512/HF40774/HF14203/HF26545/HF39732/HF36513/HF40058/HF22085/HF40486/HF27337/HF43095/HF39730/HF17984/HF31607/novel.732/HF12664/HF06391/HF43097/HF21303/HF26546/HF03311/HF42058/HF33636/HF36107/HF30422/HF24599/HF03751/HF26540/HF26596/HF18566/novel.3141/HF43094/HF32028/HF07618/HF04768/HF04807/HF25735/HF36024/HF23619…	-/-/-/-/-/-/-/-/-/-/-/-/-/-/-/-/-/-/-/-/-/-/-/-/-/-/-/-/-/-/-/-/-/-/-/-/-/-/-/-/-/-/-/-/-/-/-/-/-/-/-/-/-/-/-/-/-/-/-/-/-/-/-/-/-/-/-/-/-/-/-/-/-/-/-/-/-/-/-/-/-/-/-/-/-/-/-/-/-/-	90	51	HF21006/HF19303/HF32496/novel.3057/HF15794/HF38097/HF28512/HF40774/HF14203/HF39732/HF36513/HF40058/HF27337/HF39730/HF12664/HF06391/HF03311/HF42058/HF33636/HF30422/HF03751/HF26596/HF18566/HF32028/HF25735/HF36024/HF23619/HF22050/HF03488/HF10428/novel.2543/HF43101/HF09483/HF15570/HF35330/HF05384/HF01606/HF02241/HF37582/HF07203/HF20770/HF44584/HF25885/HF33686/HF34256/HF24555/HF34660/HF28459/HF22867/H…	39	HF27668/HF01632/HF32087/HF25801/HF26545/HF22085/HF40486/HF43095/HF17984/HF31607/novel.732/HF43097/HF21303/HF26546/HF36107/HF24599/HF26540/novel.3141/HF43094/HF07618/HF04768/HF04807/HF01867/HF23113/HF08790/HF16033/HF42059/HF04510/HF40490/HF39736/HF11351/HF06357/HF01279/HF26468/HF26536/HF31447/HF03773/HF16032/HF33687
BP	GO:0046148	pigment biosynthetic process	6/1994	15/11133	0.0377531	0.810992	novel.2917/HF38483/HF31655/HF13201/HF05901/HF06680	-/-/-/-/-/-	6	1	HF05901	5	novel.2917/HF38483/HF31655/HF13201/HF06680
BP	GO:1901617	organic hydroxy compound biosynthetic process	6/1994	15/11133	0.0377531	0.810992	HF06210/HF37694/HF15418/HF11858/HF14104/HF40472	-/-/-/-/-/-	6	0		6	HF06210/HF37694/HF15418/HF11858/HF14104/HF40472
BP	GO:0008299	isoprenoid biosynthetic process	10/1994	33/11133	0.0578376	1	HF03066/HF28156/novel.2917/novel.2828/novel.1210/HF15138/HF12386/HF18284/HF26676/HF05901	-/-/-/-/-/-/-/-/-/-	10	4	novel.1210/HF15138/HF12386/HF05901	6	HF03066/HF28156/novel.2917/novel.2828/HF18284/HF26676
BP	GO:0006821	chloride transport	6/1994	17/11133	0.0679314	1	HF10694/HF39007/HF34519/HF10670/HF10686/HF30353	-/-/-/-/-/-	6	5	HF10694/HF39007/HF34519/HF10670/HF10686	1	HF30353
BP	GO:0006720	isoprenoid metabolic process	10/1994	35/11133	0.0820972	1	HF03066/HF28156/novel.2917/novel.2828/novel.1210/HF15138/HF12386/HF18284/HF26676/HF05901	-/-/-/-/-/-/-/-/-/-	10	4	novel.1210/HF15138/HF12386/HF05901	6	HF03066/HF28156/novel.2917/novel.2828/HF18284/HF26676
BP	GO:1901615	organic hydroxy compound metabolic process	10/1994	35/11133	0.0820972	1	HF06210/HF37694/HF15418/HF26148/HF11858/HF34836/HF08098/HF14104/HF37266/HF40472	-/-/-/-/-/-/-/-/-/-	10	2	HF34836/HF08098	8	HF06210/HF37694/HF15418/HF26148/HF11858/HF14104/HF37266/HF40472
BP	GO:0032957	inositol trisphosphate metabolic process	4/1994	10/11133	0.0869248	1	HF26148/HF34836/HF08098/HF37266	-/-/-/-	4	2	HF34836/HF08098	2	HF26148/HF37266
BP	GO:0043647	inositol phosphate metabolic process	4/1994	10/11133	0.0869248	1	HF26148/HF34836/HF08098/HF37266	-/-/-/-	4	2	HF34836/HF08098	2	HF26148/HF37266
BP	GO:0006721	terpenoid metabolic process	5/1994	14/11133	0.0890006	1	novel.2917/novel.2828/HF15138/HF26676/HF05901	-/-/-/-/-	5	2	HF15138/HF05901	3	novel.2917/novel.2828/HF26676
BP	GO:0016114	terpenoid biosynthetic process	5/1994	14/11133	0.0890006	1	novel.2917/novel.2828/HF15138/HF26676/HF05901	-/-/-/-/-	5	2	HF15138/HF05901	3	novel.2917/novel.2828/HF26676
BP	GO:0042545	cell wall modification	16/1994	65/11133	0.108086	1	HF19108/HF30633/HF00950/HF15830/novel.718/HF00959/HF23736/HF18834/HF07920/HF25660/novel.719/HF00958/HF30850/novel.731/HF23779/HF29692	-/-/-/-/-/-/-/-/-/-/-/-/-/-/-/-	16	7	HF19108/HF00950/HF00959/HF07920/HF00958/novel.731/HF29692	9	HF30633/HF15830/novel.718/HF23736/HF18834/HF25660/novel.719/HF30850/HF23779
BP	GO:0007015	actin filament organization	5/1994	15/11133	0.114624	1	HF39297/HF17199/HF19430/HF14581/HF39278	-/-/-/-/-	5	5	HF39297/HF17199/HF19430/HF14581/HF39278	0
BP	GO:0008064	regulation of actin polymerization or depolymerization	5/1994	15/11133	0.114624	1	HF39297/HF17199/HF19430/HF14581/HF39278	-/-/-/-/-	5	5	HF39297/HF17199/HF19430/HF14581/HF39278	0
BP	GO:0008154	actin polymerization or depolymerization	5/1994	15/11133	0.114624	1	HF39297/HF17199/HF19430/HF14581/HF39278	-/-/-/-/-	5	5	HF39297/HF17199/HF19430/HF14581/HF39278	0
BP	GO:0010035	response to inorganic substance	5/1994	15/11133	0.114624	1	HF09067/HF27668/HF41384/HF36107/novel.3141	-/-/-/-/-	5	0		5	HF09067/HF27668/HF41384/HF36107/novel.3141
BP	GO:0030029	actin filament-based process	5/1994	15/11133	0.114624	1	HF39297/HF17199/HF19430/HF14581/HF39278	-/-/-/-/-	5	5	HF39297/HF17199/HF19430/HF14581/HF39278	0
BP	GO:0030036	actin cytoskeleton organization	5/1994	15/11133	0.114624	1	HF39297/HF17199/HF19430/HF14581/HF39278	-/-/-/-/-	5	5	HF39297/HF17199/HF19430/HF14581/HF39278	0
BP	GO:0030041	actin filament polymerization	5/1994	15/11133	0.114624	1	HF39297/HF17199/HF19430/HF14581/HF39278	-/-/-/-/-	5	5	HF39297/HF17199/HF19430/HF14581/HF39278	0
BP	GO:0030832	regulation of actin filament length	5/1994	15/11133	0.114624	1	HF39297/HF17199/HF19430/HF14581/HF39278	-/-/-/-/-	5	5	HF39297/HF17199/HF19430/HF14581/HF39278	0
BP	GO:0030833	regulation of actin filament polymerization	5/1994	15/11133	0.114624	1	HF39297/HF17199/HF19430/HF14581/HF39278	-/-/-/-/-	5	5	HF39297/HF17199/HF19430/HF14581/HF39278	0
BP	GO:0032535	regulation of cellular component size	5/1994	15/11133	0.114624	1	HF39297/HF17199/HF19430/HF14581/HF39278	-/-/-/-/-	5	5	HF39297/HF17199/HF19430/HF14581/HF39278	0
BP	GO:0032956	regulation of actin cytoskeleton organization	5/1994	15/11133	0.114624	1	HF39297/HF17199/HF19430/HF14581/HF39278	-/-/-/-/-	5	5	HF39297/HF17199/HF19430/HF14581/HF39278	0
BP	GO:0032970	regulation of actin filament-based process	5/1994	15/11133	0.114624	1	HF39297/HF17199/HF19430/HF14581/HF39278	-/-/-/-/-	5	5	HF39297/HF17199/HF19430/HF14581/HF39278	0
BP	GO:0090066	regulation of anatomical structure size	5/1994	15/11133	0.114624	1	HF39297/HF17199/HF19430/HF14581/HF39278	-/-/-/-/-	5	5	HF39297/HF17199/HF19430/HF14581/HF39278	0
BP	GO:0110053	regulation of actin filament organization	5/1994	15/11133	0.114624	1	HF39297/HF17199/HF19430/HF14581/HF39278	-/-/-/-/-	5	5	HF39297/HF17199/HF19430/HF14581/HF39278	0
BP	GO:0007051	spindle organization	4/1994	11/11133	0.117933	1	HF00242/HF33434/HF00243/HF33440	-/-/-/-	4	4	HF00242/HF33434/HF00243/HF33440	0
BP	GO:0051225	spindle assembly	4/1994	11/11133	0.117933	1	HF00242/HF33434/HF00243/HF33440	-/-/-/-	4	4	HF00242/HF33434/HF00243/HF33440	0
BP	GO:0007010	cytoskeleton organization	13/1994	52/11133	0.125823	1	HF42023/HF39297/HF17199/novel.3377/HF12369/HF00242/HF33434/HF00243/HF19430/HF33440/HF14581/HF39278/novel.1692	-/-/-/-/-/-/-/-/-/-/-/-/-	13	12	HF42023/HF39297/HF17199/novel.3377/HF12369/HF00242/HF33434/HF00243/HF19430/HF33440/HF14581/HF39278	1	novel.1692
BP	GO:0032268	regulation of cellular protein metabolic process	6/1994	20/11133	0.132977	1	HF08433/HF21626/HF25596/HF23801/HF08436/HF14670	-/-/-/-/-/-	6	1	HF21626	5	HF08433/HF25596/HF23801/HF08436/HF14670
BP	GO:0006766	vitamin metabolic process	8/1994	29/11133	0.133185	1	HF06210/HF37694/HF34596/HF15418/HF41914/HF30157/HF14104/HF40472	-/-/-/-/-/-/-/-	8	2	HF34596/HF30157	6	HF06210/HF37694/HF15418/HF41914/HF14104/HF40472
BP	GO:0006767	water-soluble vitamin metabolic process	8/1994	29/11133	0.133185	1	HF06210/HF37694/HF34596/HF15418/HF41914/HF30157/HF14104/HF40472	-/-/-/-/-/-/-/-	8	2	HF34596/HF30157	6	HF06210/HF37694/HF15418/HF41914/HF14104/HF40472
BP	GO:0009110	vitamin biosynthetic process	8/1994	29/11133	0.133185	1	HF06210/HF37694/HF34596/HF15418/HF41914/HF30157/HF14104/HF40472	-/-/-/-/-/-/-/-	8	2	HF34596/HF30157	6	HF06210/HF37694/HF15418/HF41914/HF14104/HF40472
BP	GO:0042364	water-soluble vitamin biosynthetic process	8/1994	29/11133	0.133185	1	HF06210/HF37694/HF34596/HF15418/HF41914/HF30157/HF14104/HF40472	-/-/-/-/-/-/-/-	8	2	HF34596/HF30157	6	HF06210/HF37694/HF15418/HF41914/HF14104/HF40472
BP	GO:0009628	response to abiotic stimulus	5/1994	16/11133	0.143315	1	HF27668/HF11865/HF18204/HF36107/novel.3141	-/-/-/-/-	5	0		5	HF27668/HF11865/HF18204/HF36107/novel.3141
BP	GO:0071554	cell wall organization or biogenesis	22/1994	98/11133	0.148371	1	HF19108/HF30633/HF24821/HF19224/HF00950/HF15830/novel.718/HF00959/HF23736/HF18834/HF07920/HF25660/HF31571/HF33416/novel.719/HF00954/HF29684/HF00958/HF30850/novel.731/HF23779/HF29692	-/-/-/-/-/-/-/-/-/-/-/-/-/-/-/-/-/-/-/-/-/-	22	11	HF19108/HF24821/HF00950/HF00959/HF07920/HF33416/HF00954/HF29684/HF00958/novel.731/HF29692	11	HF30633/HF19224/HF15830/novel.718/HF23736/HF18834/HF25660/HF31571/novel.719/HF30850/HF23779
BP	GO:0015698	inorganic anion transport	11/1994	44/11133	0.151011	1	HF09067/HF23371/HF41384/HF10694/HF39007/HF34519/HF10670/HF10686/HF17231/HF34001/HF30353	-/-/-/-/-/-/-/-/-/-/-	11	7	HF23371/HF10694/HF39007/HF34519/HF10670/HF10686/HF34001	4	HF09067/HF41384/HF17231/HF30353
BP	GO:0051704	multi-organism process	19/1994	84/11133	0.161355	1	HF04488/HF33591/HF32295/novel.1037/HF04483/HF17864/HF39463/novel.1848/HF17406/HF32028/HF12185/HF11323/novel.2442/HF16033/HF17405/HF33606/HF04484/HF16032/novel.985	-/-/-/-/-/-/-/-/-/-/-/-/-/-/-/-/-/-/-	19	7	HF04488/HF32295/novel.1848/HF32028/HF11323/novel.2442/novel.985	12	HF33591/novel.1037/HF04483/HF17864/HF39463/HF17406/HF12185/HF16033/HF17405/HF33606/HF04484/HF16032
BP	GO:0006298	mismatch repair	5/1994	17/11133	0.174725	1	HF25801/HF28512/HF17984/HF03488/HF01279	-/-/-/-/-	5	2	HF28512/HF03488	3	HF25801/HF17984/HF01279
BP	GO:0016052	carbohydrate catabolic process	23/1994	106/11133	0.183939	1	HF37337/HF04141/HF42124/HF12314/HF01223/HF17970/HF19497/HF36717/HF37198/HF30087/HF04121/HF13132/HF28596/HF04116/HF35913/HF04150/HF06019/HF28597/HF43199/HF36955/HF34430/HF02052/novel.2945	-/-/-/-/-/-/-/-/-/-/-/-/-/-/-/-/-/-/-/-/-/-/-	23	10	HF42124/HF12314/HF17970/HF36717/HF30087/HF13132/HF06019/HF36955/HF34430/novel.2945	13	HF37337/HF04141/HF01223/HF19497/HF37198/HF04121/HF28596/HF04116/HF35913/HF04150/HF28597/HF43199/HF02052
BP	GO:0005992	trehalose biosynthetic process	6/1994	22/11133	0.188049	1	HF09151/HF25948/HF06375/HF42570/HF07962/HF41274	-/-/-/-/-/-	6	5	HF09151/HF06375/HF42570/HF07962/HF41274	1	HF25948
BP	GO:0006778	porphyrin-containing compound metabolic process	6/1994	22/11133	0.188049	1	HF38483/HF30423/HF31655/HF13201/HF28207/HF06680	-/-/-/-/-/-	6	1	HF28207	5	HF38483/HF30423/HF31655/HF13201/HF06680
BP	GO:0045229	external encapsulating structure organization	18/1994	81/11133	0.189881	1	HF19108/HF30633/HF00950/HF15830/novel.718/HF00959/HF23736/HF18834/HF07920/HF25660/HF33416/novel.719/HF29684/HF00958/HF30850/novel.731/HF23779/HF29692	-/-/-/-/-/-/-/-/-/-/-/-/-/-/-/-/-/-	18	9	HF19108/HF00950/HF00959/HF07920/HF33416/HF29684/HF00958/novel.731/HF29692	9	HF30633/HF15830/novel.718/HF23736/HF18834/HF25660/novel.719/HF30850/HF23779
BP	GO:0071555	cell wall organization	18/1994	81/11133	0.189881	1	HF19108/HF30633/HF00950/HF15830/novel.718/HF00959/HF23736/HF18834/HF07920/HF25660/HF33416/novel.719/HF29684/HF00958/HF30850/novel.731/HF23779/HF29692	-/-/-/-/-/-/-/-/-/-/-/-/-/-/-/-/-/-	18	9	HF19108/HF00950/HF00959/HF07920/HF33416/HF29684/HF00958/novel.731/HF29692	9	HF30633/HF15830/novel.718/HF23736/HF18834/HF25660/novel.719/HF30850/HF23779
BP	GO:0006308	DNA catabolic process	4/1994	13/11133	0.191266	1	HF33039/HF04505/HF17912/HF34830	-/-/-/-	4	4	HF33039/HF04505/HF17912/HF34830	0
BP	GO:0051246	regulation of protein metabolic process	6/1994	23/11133	0.218402	1	HF08433/HF21626/HF25596/HF23801/HF08436/HF14670	-/-/-/-/-/-	6	1	HF21626	5	HF08433/HF25596/HF23801/HF08436/HF14670
BP	GO:0046351	disaccharide biosynthetic process	7/1994	28/11133	0.224333	1	HF09151/HF25948/HF06375/HF42570/HF07962/HF41274/novel.884	-/-/-/-/-/-/-	7	6	HF09151/HF06375/HF42570/HF07962/HF41274/novel.884	1	HF25948
BP	GO:0048523	negative regulation of cellular process	7/1994	28/11133	0.224333	1	HF39297/HF08433/HF41369/HF04741/HF21626/HF08436/HF39278	-/-/-/-/-/-/-	7	4	HF39297/HF41369/HF21626/HF39278	3	HF08433/HF04741/HF08436
BP	GO:0005991	trehalose metabolic process	6/1994	24/11133	0.250247	1	HF09151/HF25948/HF06375/HF42570/HF07962/HF41274	-/-/-/-/-/-	6	5	HF09151/HF06375/HF42570/HF07962/HF41274	1	HF25948
BP	GO:0000079	regulation of cyclin-dependent protein serine/threonine kinase activity	3/1994	10/11133	0.260157	1	HF25596/HF23801/HF14670	-/-/-	3	0		3	HF25596/HF23801/HF14670
BP	GO:0001932	regulation of protein phosphorylation	3/1994	10/11133	0.260157	1	HF25596/HF23801/HF14670	-/-/-	3	0		3	HF25596/HF23801/HF14670
BP	GO:0009890	negative regulation of biosynthetic process	3/1994	10/11133	0.260157	1	HF08433/HF21626/HF08436	-/-/-	3	1	HF21626	2	HF08433/HF08436
BP	GO:0010558	negative regulation of macromolecule biosynthetic process	3/1994	10/11133	0.260157	1	HF08433/HF21626/HF08436	-/-/-	3	1	HF21626	2	HF08433/HF08436
BP	GO:0030838	positive regulation of actin filament polymerization	3/1994	10/11133	0.260157	1	HF17199/HF19430/HF14581	-/-/-	3	3	HF17199/HF19430/HF14581	0
BP	GO:0031324	negative regulation of cellular metabolic process	3/1994	10/11133	0.260157	1	HF08433/HF21626/HF08436	-/-/-	3	1	HF21626	2	HF08433/HF08436
BP	GO:0031327	negative regulation of cellular biosynthetic process	3/1994	10/11133	0.260157	1	HF08433/HF21626/HF08436	-/-/-	3	1	HF21626	2	HF08433/HF08436
BP	GO:0034314	Arp2/3 complex-mediated actin nucleation	3/1994	10/11133	0.260157	1	HF17199/HF19430/HF14581	-/-/-	3	3	HF17199/HF19430/HF14581	0
BP	GO:0042325	regulation of phosphorylation	3/1994	10/11133	0.260157	1	HF25596/HF23801/HF14670	-/-/-	3	0		3	HF25596/HF23801/HF14670
BP	GO:0043549	regulation of kinase activity	3/1994	10/11133	0.260157	1	HF25596/HF23801/HF14670	-/-/-	3	0		3	HF25596/HF23801/HF14670
BP	GO:0045010	actin nucleation	3/1994	10/11133	0.260157	1	HF17199/HF19430/HF14581	-/-/-	3	3	HF17199/HF19430/HF14581	0
BP	GO:0045859	regulation of protein kinase activity	3/1994	10/11133	0.260157	1	HF25596/HF23801/HF14670	-/-/-	3	0		3	HF25596/HF23801/HF14670
BP	GO:0051172	negative regulation of nitrogen compound metabolic process	3/1994	10/11133	0.260157	1	HF08433/HF21626/HF08436	-/-/-	3	1	HF21626	2	HF08433/HF08436
BP	GO:0051338	regulation of transferase activity	3/1994	10/11133	0.260157	1	HF25596/HF23801/HF14670	-/-/-	3	0		3	HF25596/HF23801/HF14670
BP	GO:0071900	regulation of protein serine/threonine kinase activity	3/1994	10/11133	0.260157	1	HF25596/HF23801/HF14670	-/-/-	3	0		3	HF25596/HF23801/HF14670
BP	GO:1904029	regulation of cyclin-dependent protein kinase activity	3/1994	10/11133	0.260157	1	HF25596/HF23801/HF14670	-/-/-	3	0		3	HF25596/HF23801/HF14670
BP	GO:2000113	negative regulation of cellular macromolecule biosynthetic process	3/1994	10/11133	0.260157	1	HF08433/HF21626/HF08436	-/-/-	3	1	HF21626	2	HF08433/HF08436
BP	GO:0000003	reproduction	17/1994	81/11133	0.274399	1	HF04488/HF33591/HF10723/HF32295/novel.1037/HF04483/HF17864/HF39463/novel.1848/HF17406/HF12185/HF11323/novel.2442/HF17405/HF33606/HF04484/novel.985	-/-/-/-/-/-/-/-/-/-/-/-/-/-/-/-/-	17	7	HF04488/HF10723/HF32295/novel.1848/HF11323/novel.2442/novel.985	10	HF33591/novel.1037/HF04483/HF17864/HF39463/HF17406/HF12185/HF17405/HF33606/HF04484
BP	GO:0022414	reproductive process	17/1994	81/11133	0.274399	1	HF04488/HF33591/HF10723/HF32295/novel.1037/HF04483/HF17864/HF39463/novel.1848/HF17406/HF12185/HF11323/novel.2442/HF17405/HF33606/HF04484/novel.985	-/-/-/-/-/-/-/-/-/-/-/-/-/-/-/-/-	17	7	HF04488/HF10723/HF32295/novel.1848/HF11323/novel.2442/novel.985	10	HF33591/novel.1037/HF04483/HF17864/HF39463/HF17406/HF12185/HF17405/HF33606/HF04484
BP	GO:0006779	porphyrin-containing compound biosynthetic process	4/1994	15/11133	0.274916	1	HF38483/HF31655/HF13201/HF06680	-/-/-/-	4	0		4	HF38483/HF31655/HF13201/HF06680
BP	GO:0046834	lipid phosphorylation	4/1994	15/11133	0.274916	1	HF04538/HF17917/HF44237/HF12326	-/-/-/-	4	1	HF12326	3	HF04538/HF17917/HF44237
BP	GO:0046854	phosphatidylinositol phosphorylation	4/1994	15/11133	0.274916	1	HF04538/HF17917/HF44237/HF12326	-/-/-/-	4	1	HF12326	3	HF04538/HF17917/HF44237
BP	GO:0070925	organelle assembly	4/1994	15/11133	0.274916	1	HF00242/HF33434/HF00243/HF33440	-/-/-/-	4	4	HF00242/HF33434/HF00243/HF33440	0
BP	GO:0008037	cell recognition	16/1994	76/11133	0.278287	1	HF04488/HF33591/HF32295/novel.1037/HF04483/HF17864/HF39463/novel.1848/HF17406/HF12185/HF11323/novel.2442/HF17405/HF33606/HF04484/novel.985	-/-/-/-/-/-/-/-/-/-/-/-/-/-/-/-	16	6	HF04488/HF32295/novel.1848/HF11323/novel.2442/novel.985	10	HF33591/novel.1037/HF04483/HF17864/HF39463/HF17406/HF12185/HF17405/HF33606/HF04484
BP	GO:0009856	pollination	16/1994	76/11133	0.278287	1	HF04488/HF33591/HF32295/novel.1037/HF04483/HF17864/HF39463/novel.1848/HF17406/HF12185/HF11323/novel.2442/HF17405/HF33606/HF04484/novel.985	-/-/-/-/-/-/-/-/-/-/-/-/-/-/-/-	16	6	HF04488/HF32295/novel.1848/HF11323/novel.2442/novel.985	10	HF33591/novel.1037/HF04483/HF17864/HF39463/HF17406/HF12185/HF17405/HF33606/HF04484
BP	GO:0009875	pollen-pistil interaction	16/1994	76/11133	0.278287	1	HF04488/HF33591/HF32295/novel.1037/HF04483/HF17864/HF39463/novel.1848/HF17406/HF12185/HF11323/novel.2442/HF17405/HF33606/HF04484/novel.985	-/-/-/-/-/-/-/-/-/-/-/-/-/-/-/-	16	6	HF04488/HF32295/novel.1848/HF11323/novel.2442/novel.985	10	HF33591/novel.1037/HF04483/HF17864/HF39463/HF17406/HF12185/HF17405/HF33606/HF04484
BP	GO:0044706	multi-multicellular organism process	16/1994	76/11133	0.278287	1	HF04488/HF33591/HF32295/novel.1037/HF04483/HF17864/HF39463/novel.1848/HF17406/HF12185/HF11323/novel.2442/HF17405/HF33606/HF04484/novel.985	-/-/-/-/-/-/-/-/-/-/-/-/-/-/-/-	16	6	HF04488/HF32295/novel.1848/HF11323/novel.2442/novel.985	10	HF33591/novel.1037/HF04483/HF17864/HF39463/HF17406/HF12185/HF17405/HF33606/HF04484
BP	GO:0048544	recognition of pollen	16/1994	76/11133	0.278287	1	HF04488/HF33591/HF32295/novel.1037/HF04483/HF17864/HF39463/novel.1848/HF17406/HF12185/HF11323/novel.2442/HF17405/HF33606/HF04484/novel.985	-/-/-/-/-/-/-/-/-/-/-/-/-/-/-/-	16	6	HF04488/HF32295/novel.1848/HF11323/novel.2442/novel.985	10	HF33591/novel.1037/HF04483/HF17864/HF39463/HF17406/HF12185/HF17405/HF33606/HF04484
BP	GO:0006694	steroid biosynthetic process	5/1994	20/11133	0.281075	1	HF38840/HF37260/HF21247/HF23269/HF16814	-/-/-/-/-	5	1	HF23269	4	HF38840/HF37260/HF21247/HF16814
BP	GO:0033013	tetrapyrrole metabolic process	8/1994	35/11133	0.282213	1	HF38483/HF12987/HF30423/HF34875/HF31655/HF13201/HF28207/HF06680	-/-/-/-/-/-/-/-	8	2	HF12987/HF28207	6	HF38483/HF30423/HF34875/HF31655/HF13201/HF06680
BP	GO:0006081	cellular aldehyde metabolic process	6/1994	25/11133	0.283273	1	HF06210/HF37694/HF15418/HF14104/HF40472/HF07846	-/-/-/-/-/-	6	0		6	HF06210/HF37694/HF15418/HF14104/HF40472/HF07846
BP	GO:0006073	cellular glucan metabolic process	18/1994	87/11133	0.288073	1	HF00861/HF33666/HF29041/HF02157/HF29069/HF41998/HF07358/HF19048/HF16214/HF39841/HF17210/HF17213/HF41760/HF41526/HF41761/HF29450/HF04907/HF02449	-/-/-/-/-/-/-/-/-/-/-/-/-/-/-/-/-/-	18	14	HF00861/HF33666/HF29041/HF02157/HF41998/HF07358/HF17210/HF17213/HF41760/HF41526/HF41761/HF29450/HF04907/HF02449	4	HF29069/HF19048/HF16214/HF39841
BP	GO:0044042	glucan metabolic process	18/1994	87/11133	0.288073	1	HF00861/HF33666/HF29041/HF02157/HF29069/HF41998/HF07358/HF19048/HF16214/HF39841/HF17210/HF17213/HF41760/HF41526/HF41761/HF29450/HF04907/HF02449	-/-/-/-/-/-/-/-/-/-/-/-/-/-/-/-/-/-	18	14	HF00861/HF33666/HF29041/HF02157/HF41998/HF07358/HF17210/HF17213/HF41760/HF41526/HF41761/HF29450/HF04907/HF02449	4	HF29069/HF19048/HF16214/HF39841
BP	GO:0044264	cellular polysaccharide metabolic process	18/1994	87/11133	0.288073	1	HF00861/HF33666/HF29041/HF02157/HF29069/HF41998/HF07358/HF19048/HF16214/HF39841/HF17210/HF17213/HF41760/HF41526/HF41761/HF29450/HF04907/HF02449	-/-/-/-/-/-/-/-/-/-/-/-/-/-/-/-/-/-	18	14	HF00861/HF33666/HF29041/HF02157/HF41998/HF07358/HF17210/HF17213/HF41760/HF41526/HF41761/HF29450/HF04907/HF02449	4	HF29069/HF19048/HF16214/HF39841
BP	GO:0009308	amine metabolic process	8/1994	36/11133	0.310599	1	HF07624/HF06541/HF42272/HF09080/HF21079/HF25408/HF30727/HF13903	-/-/-/-/-/-/-/-	8	2	HF21079/HF30727	6	HF07624/HF06541/HF42272/HF09080/HF25408/HF13903
BP	GO:0006814	sodium ion transport	3/1994	11/11133	0.313491	1	HF39148/HF15057/novel.2110	-/-/-	3	2	HF39148/novel.2110	1	HF15057
BP	GO:0007346	regulation of mitotic cell cycle	3/1994	11/11133	0.313491	1	HF41369/HF30340/HF33318	-/-/-	3	1	HF41369	2	HF30340/HF33318
BP	GO:0010564	regulation of cell cycle process	3/1994	11/11133	0.313491	1	HF41369/HF30340/HF33318	-/-/-	3	1	HF41369	2	HF30340/HF33318
BP	GO:0009605	response to external stimulus	5/1994	21/11133	0.319072	1	HF11865/HF18204/HF32028/HF16033/HF16032	-/-/-/-/-	5	1	HF32028	4	HF11865/HF18204/HF16033/HF16032
BP	GO:0019751	polyol metabolic process	5/1994	21/11133	0.319072	1	HF26148/HF11858/HF34836/HF08098/HF37266	-/-/-/-/-	5	2	HF34836/HF08098	3	HF26148/HF11858/HF37266
BP	GO:0033043	regulation of organelle organization	7/1994	32/11133	0.345542	1	HF39297/HF17199/HF41369/HF30340/HF19430/HF14581/HF39278	-/-/-/-/-/-/-	7	6	HF39297/HF17199/HF41369/HF19430/HF14581/HF39278	1	HF30340
BP	GO:0051726	regulation of cell cycle	7/1994	32/11133	0.345542	1	HF41369/HF04741/HF25596/HF30340/HF23801/HF14670/HF33318	-/-/-/-/-/-/-	7	1	HF41369	6	HF04741/HF25596/HF30340/HF23801/HF14670/HF33318
BP	GO:0044087	regulation of cellular component biogenesis	6/1994	27/11133	0.351621	1	HF39297/HF17199/HF19430/HF14581/HF33318/HF39278	-/-/-/-/-/-	6	5	HF39297/HF17199/HF19430/HF14581/HF39278	1	HF33318
BP	GO:0008202	steroid metabolic process	5/1994	22/11133	0.357609	1	HF38840/HF37260/HF21247/HF23269/HF16814	-/-/-/-/-	5	1	HF23269	4	HF38840/HF37260/HF21247/HF16814
BP	GO:0065009	regulation of molecular function	5/1994	22/11133	0.357609	1	HF25596/HF33799/HF23801/HF05895/HF14670	-/-/-/-/-	5	2	HF33799/HF05895	3	HF25596/HF23801/HF14670
BP	GO:0000041	transition metal ion transport	4/1994	17/11133	0.363109	1	HF38080/novel.694/HF03283/HF40223	-/-/-/-	4	0		4	HF38080/novel.694/HF03283/HF40223
BP	GO:0006094	gluconeogenesis	4/1994	17/11133	0.363109	1	HF32087/HF42711/HF39239/HF26149	-/-/-/-	4	2	HF42711/HF39239	2	HF32087/HF26149
BP	GO:0009073	aromatic amino acid family biosynthetic process	4/1994	17/11133	0.363109	1	HF17735/HF44388/HF06279/HF40942	-/-/-/-	4	3	HF17735/HF44388/HF06279	1	HF40942
BP	GO:0019319	hexose biosynthetic process	4/1994	17/11133	0.363109	1	HF32087/HF42711/HF39239/HF26149	-/-/-/-	4	2	HF42711/HF39239	2	HF32087/HF26149
BP	GO:0046364	monosaccharide biosynthetic process	4/1994	17/11133	0.363109	1	HF32087/HF42711/HF39239/HF26149	-/-/-/-	4	2	HF42711/HF39239	2	HF32087/HF26149
BP	GO:0006261	DNA-dependent DNA replication	3/1994	12/11133	0.367008	1	novel.1842/novel.1920/HF41806	-/-/-	3	3	novel.1842/novel.1920/HF41806	0
BP	GO:0019220	regulation of phosphate metabolic process	3/1994	12/11133	0.367008	1	HF25596/HF23801/HF14670	-/-/-	3	0		3	HF25596/HF23801/HF14670
BP	GO:0031399	regulation of protein modification process	3/1994	12/11133	0.367008	1	HF25596/HF23801/HF14670	-/-/-	3	0		3	HF25596/HF23801/HF14670
BP	GO:0051174	regulation of phosphorus metabolic process	3/1994	12/11133	0.367008	1	HF25596/HF23801/HF14670	-/-/-	3	0		3	HF25596/HF23801/HF14670
BP	GO:0044262	cellular carbohydrate metabolic process	27/1994	140/11133	0.368162	1	HF00861/HF09151/HF33666/HF25948/HF06375/HF29041/HF42570/HF02157/HF29069/HF41998/HF07358/HF19048/HF16214/HF39841/HF07962/HF31763/HF41274/HF17210/novel.884/HF17213/HF41760/HF41526/HF41761/HF32116/HF29450/HF04907/HF02449	-/-/-/-/-/-/-/-/-/-/-/-/-/-/-/-/-/-/-/-/-/-/-/-/-/-/-	27	20	HF00861/HF09151/HF33666/HF06375/HF29041/HF42570/HF02157/HF41998/HF07358/HF07962/HF41274/HF17210/novel.884/HF17213/HF41760/HF41526/HF41761/HF29450/HF04907/HF02449	7	HF25948/HF29069/HF19048/HF16214/HF39841/HF31763/HF32116
BP	GO:0006260	DNA replication	18/1994	92/11133	0.380042	1	HF28478/HF14203/HF23259/HF07244/novel.1842/HF28471/HF28467/HF27087/HF09032/HF39563/novel.1920/HF28499/HF41806/HF30777/HF11479/HF44259/HF24755/HF35534	-/-/-/-/-/-/-/-/-/-/-/-/-/-/-/-/-/-	18	13	HF14203/HF23259/novel.1842/HF28471/HF27087/novel.1920/HF28499/HF41806/HF30777/HF11479/HF44259/HF24755/HF35534	5	HF28478/HF07244/HF28467/HF09032/HF39563
BP	GO:0033014	tetrapyrrole biosynthetic process	6/1994	28/11133	0.386336	1	HF38483/HF12987/HF34875/HF31655/HF13201/HF06680	-/-/-/-/-/-	6	1	HF12987	5	HF38483/HF34875/HF31655/HF13201/HF06680
BP	GO:0005984	disaccharide metabolic process	9/1994	44/11133	0.38853	1	HF09151/HF25948/HF06375/HF42570/HF07962/HF31763/HF41274/novel.884/HF32116	-/-/-/-/-/-/-/-/-	9	6	HF09151/HF06375/HF42570/HF07962/HF41274/novel.884	3	HF25948/HF31763/HF32116
BP	GO:0007049	cell cycle	14/1994	71/11133	0.392067	1	HF40614/HF41369/HF21303/HF10723/HF04741/HF00242/HF25596/HF30340/HF23801/HF33434/HF00243/HF14670/HF33440/HF33318	-/-/-/-/-/-/-/-/-/-/-/-/-/-	14	7	HF40614/HF41369/HF10723/HF00242/HF33434/HF00243/HF33440	7	HF21303/HF04741/HF25596/HF30340/HF23801/HF14670/HF33318
BP	GO:0006066	alcohol metabolic process	5/1994	23/11133	0.396277	1	HF26148/HF11858/HF34836/HF08098/HF37266	-/-/-/-/-	5	2	HF34836/HF08098	3	HF26148/HF11858/HF37266
BP	GO:0022402	cell cycle process	8/1994	39/11133	0.398308	1	HF41369/HF04741/HF00242/HF30340/HF33434/HF00243/HF33440/HF33318	-/-/-/-/-/-/-/-	8	5	HF41369/HF00242/HF33434/HF00243/HF33440	3	HF04741/HF30340/HF33318
BP	GO:0051128	regulation of cellular component organization	8/1994	39/11133	0.398308	1	HF39297/HF17199/HF41369/HF30340/HF19430/HF14581/HF33318/HF39278	-/-/-/-/-/-/-/-	8	6	HF39297/HF17199/HF41369/HF19430/HF14581/HF39278	2	HF30340/HF33318
BP	GO:0050790	regulation of catalytic activity	4/1994	18/11133	0.407297	1	HF25596/HF23801/HF05895/HF14670	-/-/-/-	4	1	HF05895	3	HF25596/HF23801/HF14670
BP	GO:0009312	oligosaccharide biosynthetic process	7/1994	34/11133	0.409047	1	HF09151/HF25948/HF06375/HF42570/HF07962/HF41274/novel.884	-/-/-/-/-/-/-	7	6	HF09151/HF06375/HF42570/HF07962/HF41274/novel.884	1	HF25948
BP	GO:0006026	aminoglycan catabolic process	3/1994	13/11133	0.419731	1	HF19224/HF31571/HF00954	-/-/-	3	1	HF00954	2	HF19224/HF31571
BP	GO:0006030	chitin metabolic process	3/1994	13/11133	0.419731	1	HF19224/HF31571/HF00954	-/-/-	3	1	HF00954	2	HF19224/HF31571
BP	GO:0006032	chitin catabolic process	3/1994	13/11133	0.419731	1	HF19224/HF31571/HF00954	-/-/-	3	1	HF00954	2	HF19224/HF31571
BP	GO:0006040	amino sugar metabolic process	3/1994	13/11133	0.419731	1	HF19224/HF31571/HF00954	-/-/-	3	1	HF00954	2	HF19224/HF31571
BP	GO:0006825	copper ion transport	3/1994	13/11133	0.419731	1	novel.694/HF03283/HF40223	-/-/-	3	0		3	novel.694/HF03283/HF40223
BP	GO:0016998	cell wall macromolecule catabolic process	3/1994	13/11133	0.419731	1	HF19224/HF31571/HF00954	-/-/-	3	1	HF00954	2	HF19224/HF31571
BP	GO:0044036	cell wall macromolecule metabolic process	3/1994	13/11133	0.419731	1	HF19224/HF31571/HF00954	-/-/-	3	1	HF00954	2	HF19224/HF31571
BP	GO:0046348	amino sugar catabolic process	3/1994	13/11133	0.419731	1	HF19224/HF31571/HF00954	-/-/-	3	1	HF00954	2	HF19224/HF31571
BP	GO:1901071	glucosamine-containing compound metabolic process	3/1994	13/11133	0.419731	1	HF19224/HF31571/HF00954	-/-/-	3	1	HF00954	2	HF19224/HF31571
BP	GO:1901072	glucosamine-containing compound catabolic process	3/1994	13/11133	0.419731	1	HF19224/HF31571/HF00954	-/-/-	3	1	HF00954	2	HF19224/HF31571
BP	GO:0016567	protein ubiquitination	17/1994	89/11133	0.427097	1	HF26036/HF01818/HF22631/HF22234/HF41158/HF42005/HF07357/HF18154/HF35547/HF09147/HF32203/HF36171/HF42084/HF20925/HF17856/HF31919/HF42296	-/-/-/-/-/-/-/-/-/-/-/-/-/-/-/-/-	17	5	HF35547/HF36171/HF20925/HF17856/HF42296	12	HF26036/HF01818/HF22631/HF22234/HF41158/HF42005/HF07357/HF18154/HF09147/HF32203/HF42084/HF31919
BP	GO:0048519	negative regulation of biological process	10/1994	51/11133	0.431702	1	HF39297/HF08433/HF32519/HF41369/HF04741/HF21626/HF05895/HF08436/HF00044/HF39278	-/-/-/-/-/-/-/-/-/-	10	7	HF39297/HF32519/HF41369/HF21626/HF05895/HF00044/HF39278	3	HF08433/HF04741/HF08436
BP	GO:0009072	aromatic amino acid family metabolic process	5/1994	24/11133	0.434706	1	HF17735/HF44388/HF06279/HF40942/HF25408	-/-/-/-/-	5	3	HF17735/HF44388/HF06279	2	HF40942/HF25408
BP	GO:0032271	regulation of protein polymerization	5/1994	24/11133	0.434706	1	HF39297/HF17199/HF19430/HF14581/HF39278	-/-/-/-/-	5	5	HF39297/HF17199/HF19430/HF14581/HF39278	0
BP	GO:0043254	regulation of protein complex assembly	5/1994	24/11133	0.434706	1	HF39297/HF17199/HF19430/HF14581/HF39278	-/-/-/-/-	5	5	HF39297/HF17199/HF19430/HF14581/HF39278	0
BP	GO:0051258	protein polymerization	5/1994	24/11133	0.434706	1	HF39297/HF17199/HF19430/HF14581/HF39278	-/-/-/-/-	5	5	HF39297/HF17199/HF19430/HF14581/HF39278	0
BP	GO:0051493	regulation of cytoskeleton organization	5/1994	24/11133	0.434706	1	HF39297/HF17199/HF19430/HF14581/HF39278	-/-/-/-/-	5	5	HF39297/HF17199/HF19430/HF14581/HF39278	0
BP	GO:0097435	supramolecular fiber organization	5/1994	24/11133	0.434706	1	HF39297/HF17199/HF19430/HF14581/HF39278	-/-/-/-/-	5	5	HF39297/HF17199/HF19430/HF14581/HF39278	0
BP	GO:1902903	regulation of supramolecular fiber organization	5/1994	24/11133	0.434706	1	HF39297/HF17199/HF19430/HF14581/HF39278	-/-/-/-/-	5	5	HF39297/HF17199/HF19430/HF14581/HF39278	0
BP	GO:0030258	lipid modification	6/1994	30/11133	0.455451	1	HF09500/HF04538/HF24586/HF17917/HF44237/HF12326	-/-/-/-/-/-	6	1	HF12326	5	HF09500/HF04538/HF24586/HF17917/HF44237
BP	GO:0044272	sulfur compound biosynthetic process	6/1994	30/11133	0.455451	1	novel.1238/HF34596/HF30930/HF28414/HF15923/HF43686	-/-/-/-/-/-	6	2	novel.1238/HF34596	4	HF30930/HF28414/HF15923/HF43686
BP	GO:0032446	protein modification by small protein conjugation	17/1994	91/11133	0.466454	1	HF26036/HF01818/HF22631/HF22234/HF41158/HF42005/HF07357/HF18154/HF35547/HF09147/HF32203/HF36171/HF42084/HF20925/HF17856/HF31919/HF42296	-/-/-/-/-/-/-/-/-/-/-/-/-/-/-/-/-	17	5	HF35547/HF36171/HF20925/HF17856/HF42296	12	HF26036/HF01818/HF22631/HF22234/HF41158/HF42005/HF07357/HF18154/HF09147/HF32203/HF42084/HF31919
BP	GO:0006576	cellular biogenic amine metabolic process	3/1994	14/11133	0.470884	1	HF07624/HF42272/HF25408	-/-/-	3	0		3	HF07624/HF42272/HF25408
BP	GO:0044106	cellular amine metabolic process	3/1994	14/11133	0.470884	1	HF07624/HF42272/HF25408	-/-/-	3	0		3	HF07624/HF42272/HF25408
BP	GO:0006006	glucose metabolic process	5/1994	25/11133	0.472564	1	HF32087/HF42711/HF39239/HF26207/HF26149	-/-/-/-/-	5	2	HF42711/HF39239	3	HF32087/HF26207/HF26149
BP	GO:0010629	negative regulation of gene expression	6/1994	31/11133	0.489358	1	HF08433/HF32519/HF21626/HF05895/HF08436/HF00044	-/-/-/-/-/-	6	4	HF32519/HF21626/HF05895/HF00044	2	HF08433/HF08436
BP	GO:0000226	microtubule cytoskeleton organization	4/1994	20/11133	0.493268	1	HF00242/HF33434/HF00243/HF33440	-/-/-/-	4	4	HF00242/HF33434/HF00243/HF33440	0
BP	GO:0006265	DNA topological change	3/1994	15/11133	0.519876	1	HF14176/HF21878/HF16835	-/-/-	3	1	HF16835	2	HF14176/HF21878
BP	GO:0072527	pyrimidine-containing compound metabolic process	6/1994	32/11133	0.522546	1	novel.1238/HF34596/HF21303/HF28414/HF21155/HF43686	-/-/-/-/-/-	6	3	novel.1238/HF34596/HF21155	3	HF21303/HF28414/HF43686
BP	GO:0072528	pyrimidine-containing compound biosynthetic process	5/1994	27/11133	0.54546	1	novel.1238/HF34596/HF21303/HF28414/HF43686	-/-/-/-/-	5	2	novel.1238/HF34596	3	HF21303/HF28414/HF43686
BP	GO:0009311	oligosaccharide metabolic process	9/1994	50/11133	0.551352	1	HF09151/HF25948/HF06375/HF42570/HF07962/HF31763/HF41274/novel.884/HF32116	-/-/-/-/-/-/-/-/-	9	6	HF09151/HF06375/HF42570/HF07962/HF41274/novel.884	3	HF25948/HF31763/HF32116
BP	GO:0009892	negative regulation of metabolic process	6/1994	33/11133	0.554836	1	HF08433/HF32519/HF21626/HF05895/HF08436/HF00044	-/-/-/-/-/-	6	4	HF32519/HF21626/HF05895/HF00044	2	HF08433/HF08436
BP	GO:0010605	negative regulation of macromolecule metabolic process	6/1994	33/11133	0.554836	1	HF08433/HF32519/HF21626/HF05895/HF08436/HF00044	-/-/-/-/-/-	6	4	HF32519/HF21626/HF05895/HF00044	2	HF08433/HF08436
BP	GO:0000245	spliceosomal complex assembly	2/1994	10/11133	0.557966	1	novel.1238/novel.2176	-/-	2	1	novel.1238	1	novel.2176
BP	GO:0006376	mRNA splice site selection	2/1994	10/11133	0.557966	1	novel.1238/novel.2176	-/-	2	1	novel.1238	1	novel.2176
BP	GO:0072350	tricarboxylic acid metabolic process	2/1994	10/11133	0.557966	1	HF02735/HF42246	-/-	2	2	HF02735/HF42246	0
BP	GO:0042737	drug catabolic process	3/1994	16/11133	0.566281	1	HF19224/HF31571/HF00954	-/-/-	3	1	HF00954	2	HF19224/HF31571
BP	GO:0006414	translational elongation	4/1994	22/11133	0.573511	1	HF10179/HF06683/HF14472/HF10183	-/-/-/-	4	3	HF10179/HF06683/HF10183	1	HF14472
BP	GO:0006790	sulfur compound metabolic process	11/1994	63/11133	0.588877	1	novel.1238/HF34596/HF00051/HF30930/HF41306/HF18323/HF28414/HF04035/HF15923/HF31467/HF43686	-/-/-/-/-/-/-/-/-/-/-	11	4	novel.1238/HF34596/HF18323/HF04035	7	HF00051/HF30930/HF41306/HF28414/HF15923/HF31467/HF43686
BP	GO:0008643	carbohydrate transport	2/1994	11/11133	0.612294	1	HF41837/HF10626	-/-	2	2	HF41837/HF10626	0
BP	GO:0015696	ammonium transport	2/1994	11/11133	0.612294	1	HF30133/HF19491	-/-	2	2	HF30133/HF19491	0
BP	GO:0090305	nucleic acid phosphodiester bond hydrolysis	2/1994	11/11133	0.612294	1	HF33039/HF34830	-/-	2	2	HF33039/HF34830	0
BP	GO:0005996	monosaccharide metabolic process	7/1994	41/11133	0.619388	1	HF32087/novel.2730/HF42711/HF39239/HF26207/HF26149/HF43753	-/-/-/-/-/-/-	7	3	HF42711/HF39239/HF43753	4	HF32087/novel.2730/HF26207/HF26149
BP	GO:0072525	pyridine-containing compound biosynthetic process	14/1994	82/11133	0.623736	1	HF42124/HF06210/HF37694/HF12314/HF15418/HF37198/HF28596/HF41386/HF35913/HF06019/HF14104/HF28597/HF40472/HF34430	-/-/-/-/-/-/-/-/-/-/-/-/-/-	14	4	HF42124/HF12314/HF06019/HF34430	10	HF06210/HF37694/HF15418/HF37198/HF28596/HF41386/HF35913/HF14104/HF28597/HF40472
BP	GO:0016051	carbohydrate biosynthetic process	19/1994	112/11133	0.641948	1	HF09151/HF32087/HF25948/HF06375/HF42570/HF42711/HF29069/HF19048/HF39239/HF39841/HF07962/HF41274/HF17210/novel.884/HF17213/HF41760/HF26149/HF41526/HF41761	-/-/-/-/-/-/-/-/-/-/-/-/-/-/-/-/-/-/-	19	13	HF09151/HF06375/HF42570/HF42711/HF39239/HF07962/HF41274/HF17210/novel.884/HF17213/HF41760/HF41526/HF41761	6	HF32087/HF25948/HF29069/HF19048/HF39841/HF26149
BP	GO:0034637	cellular carbohydrate biosynthetic process	15/1994	89/11133	0.645967	1	HF09151/HF25948/HF06375/HF42570/HF29069/HF19048/HF39841/HF07962/HF41274/HF17210/novel.884/HF17213/HF41760/HF41526/HF41761	-/-/-/-/-/-/-/-/-/-/-/-/-/-/-	15	11	HF09151/HF06375/HF42570/HF07962/HF41274/HF17210/novel.884/HF17213/HF41760/HF41526/HF41761	4	HF25948/HF29069/HF19048/HF39841
BP	GO:0000278	mitotic cell cycle	3/1994	18/11133	0.650323	1	HF41369/HF30340/HF33318	-/-/-	3	1	HF41369	2	HF30340/HF33318
BP	GO:0016226	iron-sulfur cluster assembly	3/1994	18/11133	0.650323	1	HF00051/HF41306/HF04035	-/-/-	3	1	HF04035	2	HF00051/HF41306
BP	GO:0031163	metallo-sulfur cluster assembly	3/1994	18/11133	0.650323	1	HF00051/HF41306/HF04035	-/-/-	3	1	HF04035	2	HF00051/HF41306
BP	GO:0046836	glycolipid transport	3/1994	18/11133	0.650323	1	HF09856/HF09911/HF11951	-/-/-	3	1	HF09856	2	HF09911/HF11951
BP	GO:1901264	carbohydrate derivative transport	3/1994	18/11133	0.650323	1	HF09856/HF09911/HF11951	-/-/-	3	1	HF09856	2	HF09911/HF11951
BP	GO:1903047	mitotic cell cycle process	3/1994	18/11133	0.650323	1	HF41369/HF30340/HF33318	-/-/-	3	1	HF41369	2	HF30340/HF33318
BP	GO:0006633	fatty acid biosynthetic process	12/1994	72/11133	0.656435	1	HF26931/HF23511/novel.278/HF07750/HF42120/HF02479/HF01451/HF21248/HF08475/HF23663/HF24195/HF14447	-/-/-/-/-/-/-/-/-/-/-/-	12	7	HF07750/HF02479/HF01451/HF21248/HF08475/HF24195/HF14447	5	HF26931/HF23511/novel.278/HF42120/HF23663
BP	GO:0015979	photosynthesis	12/1994	72/11133	0.656435	1	HF33623/HF29954/HF21418/HF16885/HF10990/HF42420/HF06997/novel.2710/HF13920/HF30777/HF23131/HF39128	-/-/-/-/-/-/-/-/-/-/-/-	12	4	HF16885/novel.2710/HF30777/HF23131	8	HF33623/HF29954/HF21418/HF10990/HF42420/HF06997/HF13920/HF39128
BP	GO:0009690	cytokinin metabolic process	2/1994	12/11133	0.661351	1	HF21079/HF30727	-/-	2	2	HF21079/HF30727	0
BP	GO:0010817	regulation of hormone levels	2/1994	12/11133	0.661351	1	HF21079/HF30727	-/-	2	2	HF21079/HF30727	0
BP	GO:0019684	photosynthesis, light reaction	2/1994	12/11133	0.661351	1	HF33623/HF13920	-/-	2	0		2	HF33623/HF13920
BP	GO:0022618	ribonucleoprotein complex assembly	2/1994	12/11133	0.661351	1	novel.1238/novel.2176	-/-	2	1	novel.1238	1	novel.2176
BP	GO:0034754	cellular hormone metabolic process	2/1994	12/11133	0.661351	1	HF21079/HF30727	-/-	2	2	HF21079/HF30727	0
BP	GO:0042445	hormone metabolic process	2/1994	12/11133	0.661351	1	HF21079/HF30727	-/-	2	2	HF21079/HF30727	0
BP	GO:0071826	ribonucleoprotein complex subunit organization	2/1994	12/11133	0.661351	1	novel.1238/novel.2176	-/-	2	1	novel.1238	1	novel.2176
BP	GO:0017144	drug metabolic process	30/1994	177/11133	0.662083	1	HF17735/HF42124/HF07624/HF06210/HF37694/HF34596/HF12314/HF15418/HF05696/HF37198/HF19224/HF41914/HF11858/HF28596/HF06279/HF42272/HF30157/HF35913/HF37328/HF02735/HF06019/HF14104/HF28597/HF42246/HF40472/HF34430/HF31571/HF00954/HF24277/HF21230	-/-/-/-/-/-/-/-/-/-/-/-/-/-/-/-/-/-/-/-/-/-/-/-/-/-/-/-/-/-	30	12	HF17735/HF42124/HF34596/HF12314/HF06279/HF30157/HF37328/HF02735/HF06019/HF42246/HF34430/HF00954	18	HF07624/HF06210/HF37694/HF15418/HF05696/HF37198/HF19224/HF41914/HF11858/HF28596/HF42272/HF35913/HF14104/HF28597/HF40472/HF31571/HF24277/HF21230
BP	GO:0030243	cellulose metabolic process	7/1994	43/11133	0.671526	1	HF19048/HF39841/HF17210/HF17213/HF41760/HF41526/HF41761	-/-/-/-/-/-/-	7	5	HF17210/HF17213/HF41760/HF41526/HF41761	2	HF19048/HF39841
BP	GO:0030244	cellulose biosynthetic process	7/1994	43/11133	0.671526	1	HF19048/HF39841/HF17210/HF17213/HF41760/HF41526/HF41761	-/-/-/-/-/-/-	7	5	HF17210/HF17213/HF41760/HF41526/HF41761	2	HF19048/HF39841
BP	GO:0019318	hexose metabolic process	6/1994	37/11133	0.672385	1	HF32087/novel.2730/HF42711/HF39239/HF26207/HF26149	-/-/-/-/-/-	6	2	HF42711/HF39239	4	HF32087/novel.2730/HF26207/HF26149
BP	GO:0006022	aminoglycan metabolic process	3/1994	19/11133	0.687728	1	HF19224/HF31571/HF00954	-/-/-	3	1	HF00954	2	HF19224/HF31571
BP	GO:0006869	lipid transport	3/1994	19/11133	0.687728	1	HF09856/HF09911/HF11951	-/-/-	3	1	HF09856	2	HF09911/HF11951
BP	GO:0010638	positive regulation of organelle organization	3/1994	19/11133	0.687728	1	HF17199/HF19430/HF14581	-/-/-	3	3	HF17199/HF19430/HF14581	0
BP	GO:0031334	positive regulation of protein complex assembly	3/1994	19/11133	0.687728	1	HF17199/HF19430/HF14581	-/-/-	3	3	HF17199/HF19430/HF14581	0
BP	GO:0032273	positive regulation of protein polymerization	3/1994	19/11133	0.687728	1	HF17199/HF19430/HF14581	-/-/-	3	3	HF17199/HF19430/HF14581	0
BP	GO:0044089	positive regulation of cellular component biogenesis	3/1994	19/11133	0.687728	1	HF17199/HF19430/HF14581	-/-/-	3	3	HF17199/HF19430/HF14581	0
BP	GO:0051495	positive regulation of cytoskeleton organization	3/1994	19/11133	0.687728	1	HF17199/HF19430/HF14581	-/-/-	3	3	HF17199/HF19430/HF14581	0
BP	GO:1902905	positive regulation of supramolecular fiber organization	3/1994	19/11133	0.687728	1	HF17199/HF19430/HF14581	-/-/-	3	3	HF17199/HF19430/HF14581	0
BP	GO:0006289	nucleotide-excision repair	2/1994	13/11133	0.705282	1	HF31607/HF37582	-/-	2	1	HF37582	1	HF31607
BP	GO:0006839	mitochondrial transport	2/1994	13/11133	0.705282	1	HF41468/novel.2844	-/-	2	1	novel.2844	1	HF41468
BP	GO:0045786	negative regulation of cell cycle	2/1994	13/11133	0.705282	1	HF41369/HF04741	-/-	2	1	HF41369	1	HF04741
BP	GO:0007186	G-protein coupled receptor signaling pathway	4/1994	26/11133	0.709914	1	HF21442/HF09331/HF21935/HF13999	-/-/-/-	4	3	HF21442/HF09331/HF13999	1	HF21935
BP	GO:1901136	carbohydrate derivative catabolic process	4/1994	26/11133	0.709914	1	HF19224/HF38953/HF31571/HF00954	-/-/-/-	4	1	HF00954	3	HF19224/HF38953/HF31571
BP	GO:0008610	lipid biosynthetic process	31/1994	187/11133	0.712963	1	HF03066/HF26931/HF23511/HF28156/novel.278/HF07750/novel.2917/novel.2828/novel.1210/HF38840/HF15138/HF42120/HF02479/HF37260/HF12386/HF18284/HF43923/HF21247/HF19412/HF23269/HF01451/HF26676/HF21248/HF05901/HF16814/HF39677/HF08475/HF32368/HF23663/HF24195/HF14447	-/-/-/-/-/-/-/-/-/-/-/-/-/-/-/-/-/-/-/-/-/-/-/-/-/-/-/-/-/-/-	31	16	HF07750/novel.1210/HF15138/HF02479/HF12386/HF43923/HF19412/HF23269/HF01451/HF21248/HF05901/HF39677/HF08475/HF32368/HF24195/HF14447	15	HF03066/HF26931/HF23511/HF28156/novel.278/novel.2917/novel.2828/HF38840/HF42120/HF37260/HF18284/HF21247/HF26676/HF16814/HF23663
BP	GO:0022607	cellular component assembly	25/1994	152/11133	0.714017	1	HF33623/novel.1238/HF19344/HF00051/HF35864/HF37654/HF39297/HF41306/HF17199/HF04035/HF00242/HF26396/HF13920/HF33434/HF42048/HF00243/HF33416/HF19430/HF29684/HF32864/HF33440/HF14581/HF33318/HF39278/novel.2176	-/-/-/-/-/-/-/-/-/-/-/-/-/-/-/-/-/-/-/-/-/-/-/-/-	25	18	novel.1238/HF19344/HF35864/HF37654/HF39297/HF17199/HF04035/HF00242/HF33434/HF42048/HF00243/HF33416/HF19430/HF29684/HF32864/HF33440/HF14581/HF39278	7	HF33623/HF00051/HF41306/HF26396/HF13920/HF33318/novel.2176
BP	GO:0032501	multicellular organismal process	18/1994	111/11133	0.717294	1	HF04488/HF33591/HF32295/HF39710/HF05814/novel.1037/HF04483/HF17864/HF39463/novel.1848/HF17406/HF12185/HF11323/novel.2442/HF17405/HF33606/HF04484/novel.985	-/-/-/-/-/-/-/-/-/-/-/-/-/-/-/-/-/-	18	6	HF04488/HF32295/novel.1848/HF11323/novel.2442/novel.985	12	HF33591/HF39710/HF05814/novel.1037/HF04483/HF17864/HF39463/HF17406/HF12185/HF17405/HF33606/HF04484
BP	GO:0006629	lipid metabolic process	72/1994	425/11133	0.721624	1	HF03066/HF06626/HF06590/HF26931/HF23511/HF28156/novel.278/HF07750/HF13037/novel.2917/novel.2828/novel.1210/HF31761/HF38840/HF13151/HF27454/HF09500/HF39067/HF15138/HF32922/HF25571/HF14825/HF42120/HF02479/HF37260/HF12386/HF18284/HF43923/HF10259/HF21247/HF23138/HF23957/HF24662/HF19412/HF23269/HF33778/HF25408/HF29324/HF03399/HF33178/HF01451/HF34327/HF29328/HF35994/HF04538/HF26676/HF32977/HF40113/HF24…	-/-/-/-/-/-/-/-/-/-/-/-/-/-/-/-/-/-/-/-/-/-/-/-/-/-/-/-/-/-/-/-/-/-/-/-/-/-/-/-/-/-/-/-/-/-/-/-/-/-/-/-/-/-/-/-/-/-/-/-/-/-/-/-/-/-/-/-/-/-/-/-	72	36	HF07750/HF13037/novel.1210/HF27454/HF39067/HF15138/HF32922/HF25571/HF02479/HF12386/HF43923/HF23138/HF19412/HF23269/HF33778/HF29324/HF03399/HF01451/HF34327/HF29328/HF35994/HF32977/HF21248/HF05901/HF12460/HF13001/HF31369/HF39677/HF08475/HF09188/HF15557/HF32368/HF24195/HF14447/HF12326/HF00573	36	HF03066/HF06626/HF06590/HF26931/HF23511/HF28156/novel.278/novel.2917/novel.2828/HF31761/HF38840/HF13151/HF09500/HF14825/HF42120/HF37260/HF18284/HF10259/HF21247/HF23957/HF24662/HF25408/HF33178/HF04538/HF26676/HF40113/HF24586/HF17917/HF16814/HF28249/HF04000/HF44237/HF33180/HF06051/HF11765/HF23663
BP	GO:0005985	sucrose metabolic process	3/1994	20/11133	0.722044	1	HF31763/novel.884/HF32116	-/-/-	3	1	novel.884	2	HF31763/HF32116
BP	GO:0042546	cell wall biogenesis	3/1994	20/11133	0.722044	1	HF24821/HF33416/HF29684	-/-/-	3	3	HF24821/HF33416/HF29684	0
BP	GO:0006333	chromatin assembly or disassembly	5/1994	33/11133	0.72918	1	HF19344/HF35864/HF32277/HF42048/HF32864	-/-/-/-/-	5	5	HF19344/HF35864/HF32277/HF42048/HF32864	0
BP	GO:0046700	heterocycle catabolic process	15/1994	94/11133	0.730169	1	HF42124/HF12314/HF37198/HF30423/HF28596/HF33039/HF35913/HF06019/HF28597/HF05895/HF28207/HF34430/HF04505/HF17912/HF34830	-/-/-/-/-/-/-/-/-/-/-/-/-/-/-	15	10	HF42124/HF12314/HF33039/HF06019/HF05895/HF28207/HF34430/HF04505/HF17912/HF34830	5	HF37198/HF30423/HF28596/HF35913/HF28597
BP	GO:0072524	pyridine-containing compound metabolic process	15/1994	94/11133	0.730169	1	HF42124/HF06210/HF37694/HF12314/HF15418/HF37198/HF28596/HF41386/HF35913/HF06019/HF14104/HF28597/HF40472/HF34430/HF07846	-/-/-/-/-/-/-/-/-/-/-/-/-/-/-	15	4	HF42124/HF12314/HF06019/HF34430	11	HF06210/HF37694/HF15418/HF37198/HF28596/HF41386/HF35913/HF14104/HF28597/HF40472/HF07846
BP	GO:0015985	energy coupled proton transport, down electrochemical gradient	4/1994	27/11133	0.738514	1	HF05696/HF37328/HF24277/HF21230	-/-/-/-	4	1	HF37328	3	HF05696/HF24277/HF21230
BP	GO:0015986	ATP synthesis coupled proton transport	4/1994	27/11133	0.738514	1	HF05696/HF37328/HF24277/HF21230	-/-/-/-	4	1	HF37328	3	HF05696/HF24277/HF21230
BP	GO:1901361	organic cyclic compound catabolic process	15/1994	95/11133	0.745374	1	HF42124/HF12314/HF37198/HF30423/HF28596/HF33039/HF35913/HF06019/HF28597/HF05895/HF28207/HF34430/HF04505/HF17912/HF34830	-/-/-/-/-/-/-/-/-/-/-/-/-/-/-	15	10	HF42124/HF12314/HF33039/HF06019/HF05895/HF28207/HF34430/HF04505/HF17912/HF34830	5	HF37198/HF30423/HF28596/HF35913/HF28597
BP	GO:0006820	anion transport	17/1994	107/11133	0.745404	1	HF09067/HF36070/HF23371/HF26381/HF41384/HF10694/HF41468/HF23029/HF39007/HF34519/HF05844/HF10670/HF37065/HF10686/HF17231/HF34001/HF30353	-/-/-/-/-/-/-/-/-/-/-/-/-/-/-/-/-	17	12	HF36070/HF23371/HF26381/HF10694/HF23029/HF39007/HF34519/HF05844/HF10670/HF37065/HF10686/HF34001	5	HF09067/HF41384/HF41468/HF17231/HF30353
BP	GO:0009132	nucleoside diphosphate metabolic process	11/1994	71/11133	0.748654	1	HF42124/HF12314/HF37198/HF43265/HF28596/HF35913/HF06019/HF28597/HF34430/HF13820/HF39023	-/-/-/-/-/-/-/-/-/-/-	11	5	HF42124/HF12314/HF06019/HF34430/HF39023	6	HF37198/HF43265/HF28596/HF35913/HF28597/HF13820
BP	GO:0007059	chromosome segregation	3/1994	21/11133	0.753342	1	HF41369/HF30340/HF27091	-/-/-	3	1	HF41369	2	HF30340/HF27091
BP	GO:0019439	aromatic compound catabolic process	15/1994	96/11133	0.76001	1	HF42124/HF12314/HF37198/HF30423/HF28596/HF33039/HF35913/HF06019/HF28597/HF05895/HF28207/HF34430/HF04505/HF17912/HF34830	-/-/-/-/-/-/-/-/-/-/-/-/-/-/-	15	10	HF42124/HF12314/HF33039/HF06019/HF05895/HF28207/HF34430/HF04505/HF17912/HF34830	5	HF37198/HF30423/HF28596/HF35913/HF28597
BP	GO:0009116	nucleoside metabolic process	7/1994	47/11133	0.761552	1	novel.3621/HF26127/HF24794/HF22062/HF37094/novel.2757/HF17525	-/-/-/-/-/-/-	7	3	HF37094/novel.2757/HF17525	4	novel.3621/HF26127/HF24794/HF22062
BP	GO:1901657	glycosyl compound metabolic process	7/1994	47/11133	0.761552	1	novel.3621/HF26127/HF24794/HF22062/HF37094/novel.2757/HF17525	-/-/-/-/-/-/-	7	3	HF37094/novel.2757/HF17525	4	novel.3621/HF26127/HF24794/HF22062
BP	GO:0006334	nucleosome assembly	4/1994	28/11133	0.764925	1	HF19344/HF35864/HF42048/HF32864	-/-/-/-	4	4	HF19344/HF35864/HF42048/HF32864	0
BP	GO:0031497	chromatin assembly	4/1994	28/11133	0.764925	1	HF19344/HF35864/HF42048/HF32864	-/-/-/-	4	4	HF19344/HF35864/HF42048/HF32864	0
BP	GO:0034728	nucleosome organization	4/1994	28/11133	0.764925	1	HF19344/HF35864/HF42048/HF32864	-/-/-/-	4	4	HF19344/HF35864/HF42048/HF32864	0
BP	GO:0051188	cofactor biosynthetic process	23/1994	145/11133	0.772386	1	HF42124/HF06210/novel.1238/HF37694/HF12314/HF38483/HF15418/HF37198/HF11858/HF28596/HF41386/HF31655/HF28414/HF35913/HF15923/HF13201/HF06019/HF14104/HF28597/HF40472/HF34430/HF06680/HF43686	-/-/-/-/-/-/-/-/-/-/-/-/-/-/-/-/-/-/-/-/-/-/-	23	5	HF42124/novel.1238/HF12314/HF06019/HF34430	18	HF06210/HF37694/HF38483/HF15418/HF37198/HF11858/HF28596/HF41386/HF31655/HF28414/HF35913/HF15923/HF13201/HF14104/HF28597/HF40472/HF06680/HF43686
BP	GO:0044270	cellular nitrogen compound catabolic process	15/1994	97/11133	0.774072	1	HF42124/HF12314/HF37198/HF30423/HF28596/HF33039/HF35913/HF06019/HF28597/HF05895/HF28207/HF34430/HF04505/HF17912/HF34830	-/-/-/-/-/-/-/-/-/-/-/-/-/-/-	15	10	HF42124/HF12314/HF33039/HF06019/HF05895/HF28207/HF34430/HF04505/HF17912/HF34830	5	HF37198/HF30423/HF28596/HF35913/HF28597
BP	GO:0034622	cellular protein-containing complex assembly	14/1994	91/11133	0.775234	1	HF33623/novel.1238/HF19344/HF35864/HF39297/HF17199/HF26396/HF13920/HF42048/HF19430/HF32864/HF14581/HF39278/novel.2176	-/-/-/-/-/-/-/-/-/-/-/-/-/-	14	10	novel.1238/HF19344/HF35864/HF39297/HF17199/HF42048/HF19430/HF32864/HF14581/HF39278	4	HF33623/HF26396/HF13920/novel.2176
BP	GO:0009057	macromolecule catabolic process	32/1994	199/11133	0.777841	1	HF37337/HF04141/HF06916/HF01223/HF09436/HF17970/HF19497/HF36717/HF30087/HF04121/HF19224/HF13132/HF39710/HF33039/HF01256/HF04116/HF37423/HF30340/HF04150/HF19272/HF05895/HF19271/HF43199/HF36955/HF02052/HF31571/HF22882/novel.2945/HF00954/HF04505/HF17912/HF34830	-/-/-/-/-/-/-/-/-/-/-/-/-/-/-/-/-/-/-/-/-/-/-/-/-/-/-/-/-/-/-/-	32	16	HF06916/HF17970/HF36717/HF30087/HF13132/HF33039/HF01256/HF37423/HF05895/HF36955/HF22882/novel.2945/HF00954/HF04505/HF17912/HF34830	16	HF37337/HF04141/HF01223/HF09436/HF19497/HF04121/HF19224/HF39710/HF04116/HF30340/HF04150/HF19272/HF19271/HF43199/HF02052/HF31571
BP	GO:0000070	mitotic sister chromatid segregation	2/1994	15/11133	0.778882	1	HF41369/HF30340	-/-	2	1	HF41369	1	HF30340
BP	GO:0000096	sulfur amino acid metabolic process	2/1994	15/11133	0.778882	1	HF30930/HF18323	-/-	2	1	HF18323	1	HF30930
BP	GO:0000819	sister chromatid segregation	2/1994	15/11133	0.778882	1	HF41369/HF30340	-/-	2	1	HF41369	1	HF30340
BP	GO:0015980	energy derivation by oxidation of organic compounds	2/1994	15/11133	0.778882	1	HF02735/HF42246	-/-	2	2	HF02735/HF42246	0
BP	GO:0016458	gene silencing	2/1994	15/11133	0.778882	1	HF32519/HF00044	-/-	2	2	HF32519/HF00044	0
BP	GO:0031047	gene silencing by RNA	2/1994	15/11133	0.778882	1	HF32519/HF00044	-/-	2	2	HF32519/HF00044	0
BP	GO:0045333	cellular respiration	2/1994	15/11133	0.778882	1	HF02735/HF42246	-/-	2	2	HF02735/HF42246	0
BP	GO:0140014	mitotic nuclear division	2/1994	15/11133	0.778882	1	HF41369/HF30340	-/-	2	1	HF41369	1	HF30340
BP	GO:0010876	lipid localization	3/1994	22/11133	0.781736	1	HF09856/HF09911/HF11951	-/-/-	3	1	HF09856	2	HF09911/HF11951
BP	GO:0048583	regulation of response to stimulus	3/1994	22/11133	0.781736	1	HF21303/HF32028/HF18728	-/-/-	3	2	HF32028/HF18728	1	HF21303
BP	GO:0048522	positive regulation of cellular process	4/1994	29/11133	0.789204	1	HF17199/HF21303/HF19430/HF14581	-/-/-/-	4	3	HF17199/HF19430/HF14581	1	HF21303
BP	GO:0034655	nucleobase-containing compound catabolic process	13/1994	86/11133	0.790977	1	HF42124/HF12314/HF37198/HF28596/HF33039/HF35913/HF06019/HF28597/HF05895/HF34430/HF04505/HF17912/HF34830	-/-/-/-/-/-/-/-/-/-/-/-/-	13	9	HF42124/HF12314/HF33039/HF06019/HF05895/HF34430/HF04505/HF17912/HF34830	4	HF37198/HF28596/HF35913/HF28597
BP	GO:0065008	regulation of biological quality	31/1994	195/11133	0.796177	1	HF08641/HF12281/HF16068/HF16071/HF27528/novel.3057/HF06420/HF32301/HF09289/HF39297/HF17073/HF17199/HF17722/HF02163/HF12205/HF08725/novel.2667/HF21079/HF27683/HF26648/HF30727/HF05389/HF32932/HF19430/HF37818/HF14581/HF39278/HF17837/HF39128/HF20290/HF29787	-/-/-/-/-/-/-/-/-/-/-/-/-/-/-/-/-/-/-/-/-/-/-/-/-/-/-/-/-/-/-	31	14	novel.3057/HF06420/HF09289/HF39297/HF17199/HF12205/HF08725/HF21079/HF30727/HF05389/HF19430/HF14581/HF39278/HF17837	17	HF08641/HF12281/HF16068/HF16071/HF27528/HF32301/HF17073/HF17722/HF02163/novel.2667/HF27683/HF26648/HF32932/HF37818/HF39128/HF20290/HF29787
BP	GO:0008380	RNA splicing	5/1994	36/11133	0.798073	1	novel.1238/HF06252/HF27131/HF06270/novel.2176	-/-/-/-/-	5	2	novel.1238/HF06270	3	HF06252/HF27131/novel.2176
BP	GO:0051130	positive regulation of cellular component organization	3/1994	23/11133	0.807373	1	HF17199/HF19430/HF14581	-/-/-	3	3	HF17199/HF19430/HF14581	0
BP	GO:0006400	tRNA modification	2/1994	16/11133	0.809254	1	HF39375/HF17525	-/-	2	1	HF17525	1	HF39375
BP	GO:0009664	plant-type cell wall organization	2/1994	16/11133	0.809254	1	HF33416/HF29684	-/-	2	2	HF33416/HF29684	0
BP	GO:0009832	plant-type cell wall biogenesis	2/1994	16/11133	0.809254	1	HF33416/HF29684	-/-	2	2	HF33416/HF29684	0
BP	GO:0009966	regulation of signal transduction	2/1994	16/11133	0.809254	1	HF21303/HF18728	-/-	2	1	HF18728	1	HF21303
BP	GO:0010215	cellulose microfibril organization	2/1994	16/11133	0.809254	1	HF33416/HF29684	-/-	2	2	HF33416/HF29684	0
BP	GO:0010646	regulation of cell communication	2/1994	16/11133	0.809254	1	HF21303/HF18728	-/-	2	1	HF18728	1	HF21303
BP	GO:0016049	cell growth	2/1994	16/11133	0.809254	1	HF33416/HF29684	-/-	2	2	HF33416/HF29684	0
BP	GO:0023051	regulation of signaling	2/1994	16/11133	0.809254	1	HF21303/HF18728	-/-	2	1	HF18728	1	HF21303
BP	GO:0030198	extracellular matrix organization	2/1994	16/11133	0.809254	1	HF33416/HF29684	-/-	2	2	HF33416/HF29684	0
BP	GO:0040007	growth	2/1994	16/11133	0.809254	1	HF33416/HF29684	-/-	2	2	HF33416/HF29684	0
BP	GO:0043062	extracellular structure organization	2/1994	16/11133	0.809254	1	HF33416/HF29684	-/-	2	2	HF33416/HF29684	0
BP	GO:0043648	dicarboxylic acid metabolic process	2/1994	16/11133	0.809254	1	HF07561/HF14442	-/-	2	1	HF14442	1	HF07561
BP	GO:0061024	membrane organization	2/1994	16/11133	0.809254	1	HF34232/novel.2844	-/-	2	1	novel.2844	1	HF34232
BP	GO:0070726	cell wall assembly	2/1994	16/11133	0.809254	1	HF33416/HF29684	-/-	2	2	HF33416/HF29684	0
BP	GO:0071668	plant-type cell wall assembly	2/1994	16/11133	0.809254	1	HF33416/HF29684	-/-	2	2	HF33416/HF29684	0
BP	GO:0071669	plant-type cell wall organization or biogenesis	2/1994	16/11133	0.809254	1	HF33416/HF29684	-/-	2	2	HF33416/HF29684	0
BP	GO:0048518	positive regulation of biological process	4/1994	30/11133	0.811431	1	HF17199/HF21303/HF19430/HF14581	-/-/-/-	4	3	HF17199/HF19430/HF14581	1	HF21303
BP	GO:0071103	DNA conformation change	7/1994	50/11133	0.816307	1	HF19344/HF35864/HF14176/HF21878/HF42048/HF32864/HF16835	-/-/-/-/-/-/-	7	5	HF19344/HF35864/HF42048/HF32864/HF16835	2	HF14176/HF21878
BP	GO:0006887	exocytosis	6/1994	44/11133	0.824841	1	HF24961/HF27996/HF04719/HF34165/HF40037/novel.3606	-/-/-/-/-/-	6	2	HF24961/novel.3606	4	HF27996/HF04719/HF34165/HF40037
BP	GO:0032940	secretion by cell	6/1994	44/11133	0.824841	1	HF24961/HF27996/HF04719/HF34165/HF40037/novel.3606	-/-/-/-/-/-	6	2	HF24961/novel.3606	4	HF27996/HF04719/HF34165/HF40037
BP	GO:0046903	secretion	6/1994	44/11133	0.824841	1	HF24961/HF27996/HF04719/HF34165/HF40037/novel.3606	-/-/-/-/-/-	6	2	HF24961/novel.3606	4	HF27996/HF04719/HF34165/HF40037
BP	GO:0065004	protein-DNA complex assembly	4/1994	31/11133	0.831702	1	HF19344/HF35864/HF42048/HF32864	-/-/-/-	4	4	HF19344/HF35864/HF42048/HF32864	0
BP	GO:0071824	protein-DNA complex subunit organization	4/1994	31/11133	0.831702	1	HF19344/HF35864/HF42048/HF32864	-/-/-/-	4	4	HF19344/HF35864/HF42048/HF32864	0
BP	GO:0000160	phosphorelay signal transduction system	10/1994	71/11133	0.841373	1	HF24233/HF26066/HF23348/HF42003/HF25077/HF44623/HF05645/HF24818/HF28327/novel.2671	-/-/-/-/-/-/-/-/-/-	10	1	HF24818	9	HF24233/HF26066/HF23348/HF42003/HF25077/HF44623/HF05645/HF28327/novel.2671
BP	GO:0065003	protein-containing complex assembly	15/1994	103/11133	0.846486	1	HF33623/novel.1238/HF19344/HF35864/HF37654/HF39297/HF17199/HF26396/HF13920/HF42048/HF19430/HF32864/HF14581/HF39278/novel.2176	-/-/-/-/-/-/-/-/-/-/-/-/-/-/-	15	11	novel.1238/HF19344/HF35864/HF37654/HF39297/HF17199/HF42048/HF19430/HF32864/HF14581/HF39278	4	HF33623/HF26396/HF13920/novel.2176
BP	GO:0031123	RNA 3'-end processing	3/1994	25/11133	0.851056	1	HF25578/HF18961/HF25582	-/-/-	3	2	HF25578/HF25582	1	HF18961
BP	GO:0000271	polysaccharide biosynthetic process	8/1994	59/11133	0.853104	1	HF29069/HF19048/HF39841/HF17210/HF17213/HF41760/HF41526/HF41761	-/-/-/-/-/-/-/-	8	5	HF17210/HF17213/HF41760/HF41526/HF41761	3	HF29069/HF19048/HF39841
BP	GO:0009250	glucan biosynthetic process	8/1994	59/11133	0.853104	1	HF29069/HF19048/HF39841/HF17210/HF17213/HF41760/HF41526/HF41761	-/-/-/-/-/-/-/-	8	5	HF17210/HF17213/HF41760/HF41526/HF41761	3	HF29069/HF19048/HF39841
BP	GO:0033692	cellular polysaccharide biosynthetic process	8/1994	59/11133	0.853104	1	HF29069/HF19048/HF39841/HF17210/HF17213/HF41760/HF41526/HF41761	-/-/-/-/-/-/-/-	8	5	HF17210/HF17213/HF41760/HF41526/HF41761	3	HF29069/HF19048/HF39841
BP	GO:0051273	beta-glucan metabolic process	8/1994	59/11133	0.853104	1	HF29069/HF19048/HF39841/HF17210/HF17213/HF41760/HF41526/HF41761	-/-/-/-/-/-/-/-	8	5	HF17210/HF17213/HF41760/HF41526/HF41761	3	HF29069/HF19048/HF39841
BP	GO:0051274	beta-glucan biosynthetic process	8/1994	59/11133	0.853104	1	HF29069/HF19048/HF39841/HF17210/HF17213/HF41760/HF41526/HF41761	-/-/-/-/-/-/-/-	8	5	HF17210/HF17213/HF41760/HF41526/HF41761	3	HF29069/HF19048/HF39841
BP	GO:0000280	nuclear division	2/1994	18/11133	0.859035	1	HF41369/HF30340	-/-	2	1	HF41369	1	HF30340
BP	GO:0098813	nuclear chromosome segregation	2/1994	18/11133	0.859035	1	HF41369/HF30340	-/-	2	1	HF41369	1	HF30340
BP	GO:0001510	RNA methylation	1/1994	10/11133	0.861171	1	novel.3247	-	1	0		1	novel.3247
BP	GO:0007265	Ras protein signal transduction	1/1994	10/11133	0.861171	1	HF18728	-	1	1	HF18728	0
BP	GO:0009070	serine family amino acid biosynthetic process	1/1994	10/11133	0.861171	1	HF30930	-	1	0		1	HF30930
BP	GO:0032011	ARF protein signal transduction	1/1994	10/11133	0.861171	1	HF18728	-	1	1	HF18728	0
BP	GO:0032012	regulation of ARF protein signal transduction	1/1994	10/11133	0.861171	1	HF18728	-	1	1	HF18728	0
BP	GO:0035434	copper ion transmembrane transport	1/1994	10/11133	0.861171	1	HF40223	-	1	0		1	HF40223
BP	GO:0046578	regulation of Ras protein signal transduction	1/1994	10/11133	0.861171	1	HF18728	-	1	1	HF18728	0
BP	GO:0051056	regulation of small GTPase mediated signal transduction	1/1994	10/11133	0.861171	1	HF18728	-	1	1	HF18728	0
BP	GO:0051260	protein homooligomerization	1/1994	10/11133	0.861171	1	HF37654	-	1	1	HF37654	0
BP	GO:1902531	regulation of intracellular signal transduction	1/1994	10/11133	0.861171	1	HF18728	-	1	1	HF18728	0
BP	GO:0009108	coenzyme biosynthetic process	18/1994	124/11133	0.867876	1	HF42124/HF06210/novel.1238/HF37694/HF12314/HF15418/HF37198/HF11858/HF28596/HF41386/HF28414/HF35913/HF06019/HF14104/HF28597/HF40472/HF34430/HF43686	-/-/-/-/-/-/-/-/-/-/-/-/-/-/-/-/-/-	18	5	HF42124/novel.1238/HF12314/HF06019/HF34430	13	HF06210/HF37694/HF15418/HF37198/HF11858/HF28596/HF41386/HF28414/HF35913/HF14104/HF28597/HF40472/HF43686
BP	GO:0001522	pseudouridine synthesis	3/1994	26/11133	0.869466	1	HF15791/HF30012/HF16005	-/-/-	3	1	HF15791	2	HF30012/HF16005
BP	GO:0042592	homeostatic process	22/1994	150/11133	0.876823	1	HF08641/HF12281/HF16068/HF16071/HF27528/novel.3057/HF06420/HF32301/HF09289/HF17073/HF17722/HF02163/HF12205/HF08725/novel.2667/HF27683/HF26648/HF05389/HF32932/HF37818/HF17837/HF20290	-/-/-/-/-/-/-/-/-/-/-/-/-/-/-/-/-/-/-/-/-/-	22	7	novel.3057/HF06420/HF09289/HF12205/HF08725/HF05389/HF17837	15	HF08641/HF12281/HF16068/HF16071/HF27528/HF32301/HF17073/HF17722/HF02163/novel.2667/HF27683/HF26648/HF32932/HF37818/HF20290
BP	GO:0006096	glycolytic process	8/1994	61/11133	0.877427	1	HF42124/HF12314/HF37198/HF28596/HF35913/HF06019/HF28597/HF34430	-/-/-/-/-/-/-/-	8	4	HF42124/HF12314/HF06019/HF34430	4	HF37198/HF28596/HF35913/HF28597
BP	GO:0006757	ATP generation from ADP	8/1994	61/11133	0.877427	1	HF42124/HF12314/HF37198/HF28596/HF35913/HF06019/HF28597/HF34430	-/-/-/-/-/-/-/-	8	4	HF42124/HF12314/HF06019/HF34430	4	HF37198/HF28596/HF35913/HF28597
BP	GO:0009135	purine nucleoside diphosphate metabolic process	8/1994	61/11133	0.877427	1	HF42124/HF12314/HF37198/HF28596/HF35913/HF06019/HF28597/HF34430	-/-/-/-/-/-/-/-	8	4	HF42124/HF12314/HF06019/HF34430	4	HF37198/HF28596/HF35913/HF28597
BP	GO:0009179	purine ribonucleoside diphosphate metabolic process	8/1994	61/11133	0.877427	1	HF42124/HF12314/HF37198/HF28596/HF35913/HF06019/HF28597/HF34430	-/-/-/-/-/-/-/-	8	4	HF42124/HF12314/HF06019/HF34430	4	HF37198/HF28596/HF35913/HF28597
BP	GO:0009185	ribonucleoside diphosphate metabolic process	8/1994	61/11133	0.877427	1	HF42124/HF12314/HF37198/HF28596/HF35913/HF06019/HF28597/HF34430	-/-/-/-/-/-/-/-	8	4	HF42124/HF12314/HF06019/HF34430	4	HF37198/HF28596/HF35913/HF28597
BP	GO:0042866	pyruvate biosynthetic process	8/1994	61/11133	0.877427	1	HF42124/HF12314/HF37198/HF28596/HF35913/HF06019/HF28597/HF34430	-/-/-/-/-/-/-/-	8	4	HF42124/HF12314/HF06019/HF34430	4	HF37198/HF28596/HF35913/HF28597
BP	GO:0046031	ADP metabolic process	8/1994	61/11133	0.877427	1	HF42124/HF12314/HF37198/HF28596/HF35913/HF06019/HF28597/HF34430	-/-/-/-/-/-/-/-	8	4	HF42124/HF12314/HF06019/HF34430	4	HF37198/HF28596/HF35913/HF28597
BP	GO:0009064	glutamine family amino acid metabolic process	2/1994	19/11133	0.879189	1	HF04674/HF07792	-/-	2	1	HF07792	1	HF04674
BP	GO:0022411	cellular component disassembly	2/1994	19/11133	0.879189	1	HF39297/HF39278	-/-	2	2	HF39297/HF39278	0
BP	GO:0032984	protein-containing complex disassembly	2/1994	19/11133	0.879189	1	HF39297/HF39278	-/-	2	2	HF39297/HF39278	0
BP	GO:0043624	cellular protein complex disassembly	2/1994	19/11133	0.879189	1	HF39297/HF39278	-/-	2	2	HF39297/HF39278	0
BP	GO:0051186	cofactor metabolic process	29/1994	194/11133	0.882783	1	HF42124/HF06210/novel.1238/HF37694/HF12314/HF38483/HF15418/HF00051/HF41306/HF37198/HF30423/HF11858/HF28596/HF41386/HF31655/HF28414/HF35913/HF04035/HF15923/HF13201/HF06019/HF14104/HF28597/HF28207/HF40472/HF34430/HF07846/HF06680/HF43686	-/-/-/-/-/-/-/-/-/-/-/-/-/-/-/-/-/-/-/-/-/-/-/-/-/-/-/-/-	29	7	HF42124/novel.1238/HF12314/HF04035/HF06019/HF28207/HF34430	22	HF06210/HF37694/HF38483/HF15418/HF00051/HF41306/HF37198/HF30423/HF11858/HF28596/HF41386/HF31655/HF28414/HF35913/HF15923/HF13201/HF14104/HF28597/HF40472/HF07846/HF06680/HF43686
BP	GO:0032259	methylation	7/1994	55/11133	0.885191	1	HF21135/novel.3247/HF43161/HF13474/HF11685/HF02761/HF28446	-/-/-/-/-/-/-	7	2	HF11685/HF28446	5	HF21135/novel.3247/HF43161/HF13474/HF02761
BP	GO:0019725	cellular homeostasis	21/1994	145/11133	0.88574	1	HF08641/HF12281/HF16068/HF16071/HF27528/HF06420/HF32301/HF09289/HF17073/HF17722/HF02163/HF12205/HF08725/novel.2667/HF27683/HF26648/HF05389/HF32932/HF37818/HF17837/HF20290	-/-/-/-/-/-/-/-/-/-/-/-/-/-/-/-/-/-/-/-/-	21	6	HF06420/HF09289/HF12205/HF08725/HF05389/HF17837	15	HF08641/HF12281/HF16068/HF16071/HF27528/HF32301/HF17073/HF17722/HF02163/novel.2667/HF27683/HF26648/HF32932/HF37818/HF20290
BP	GO:0006631	fatty acid metabolic process	12/1994	88/11133	0.88589	1	HF26931/HF23511/novel.278/HF07750/HF42120/HF02479/HF01451/HF21248/HF08475/HF23663/HF24195/HF14447	-/-/-/-/-/-/-/-/-/-/-/-	12	7	HF07750/HF02479/HF01451/HF21248/HF08475/HF24195/HF14447	5	HF26931/HF23511/novel.278/HF42120/HF23663
BP	GO:0000097	sulfur amino acid biosynthetic process	1/1994	11/11133	0.886058	1	HF30930	-	1	0		1	HF30930
BP	GO:0006465	signal peptide processing	1/1994	11/11133	0.886058	1	HF44346	-	1	1	HF44346	0
BP	GO:0008283	cell proliferation	1/1994	11/11133	0.886058	1	HF08114	-	1	0		1	HF08114
BP	GO:0009163	nucleoside biosynthetic process	1/1994	11/11133	0.886058	1	HF17525	-	1	1	HF17525	0
BP	GO:0042455	ribonucleoside biosynthetic process	1/1994	11/11133	0.886058	1	HF17525	-	1	1	HF17525	0
BP	GO:0043631	RNA polyadenylation	1/1994	11/11133	0.886058	1	HF18961	-	1	0		1	HF18961
BP	GO:1901659	glycosyl compound biosynthetic process	1/1994	11/11133	0.886058	1	HF17525	-	1	1	HF17525	0
BP	GO:0045454	cell redox homeostasis	20/1994	140/11133	0.894587	1	HF08641/HF12281/HF16068/HF16071/HF27528/HF06420/HF32301/HF09289/HF17073/HF17722/HF02163/HF12205/HF08725/novel.2667/HF27683/HF26648/HF05389/HF32932/HF17837/HF20290	-/-/-/-/-/-/-/-/-/-/-/-/-/-/-/-/-/-/-/-	20	6	HF06420/HF09289/HF12205/HF08725/HF05389/HF17837	14	HF08641/HF12281/HF16068/HF16071/HF27528/HF32301/HF17073/HF17722/HF02163/novel.2667/HF27683/HF26648/HF32932/HF20290
BP	GO:0006323	DNA packaging	4/1994	35/11133	0.895419	1	HF19344/HF35864/HF42048/HF32864	-/-/-/-	4	4	HF19344/HF35864/HF42048/HF32864	0
BP	GO:0006220	pyrimidine nucleotide metabolic process	2/1994	20/11133	0.89665	1	HF21303/HF21155	-/-	2	1	HF21155	1	HF21303
BP	GO:0009066	aspartate family amino acid metabolic process	2/1994	20/11133	0.89665	1	HF18323/HF14442	-/-	2	2	HF18323/HF14442	0
BP	GO:0017038	protein import	2/1994	20/11133	0.89665	1	novel.2844/HF22134	-/-	2	1	novel.2844	1	HF22134
BP	GO:0006090	pyruvate metabolic process	8/1994	63/11133	0.898331	1	HF42124/HF12314/HF37198/HF28596/HF35913/HF06019/HF28597/HF34430	-/-/-/-/-/-/-/-	8	4	HF42124/HF12314/HF06019/HF34430	4	HF37198/HF28596/HF35913/HF28597
BP	GO:0009166	nucleotide catabolic process	8/1994	63/11133	0.898331	1	HF42124/HF12314/HF37198/HF28596/HF35913/HF06019/HF28597/HF34430	-/-/-/-/-/-/-/-	8	4	HF42124/HF12314/HF06019/HF34430	4	HF37198/HF28596/HF35913/HF28597
BP	GO:1901292	nucleoside phosphate catabolic process	8/1994	63/11133	0.898331	1	HF42124/HF12314/HF37198/HF28596/HF35913/HF06019/HF28597/HF34430	-/-/-/-/-/-/-/-	8	4	HF42124/HF12314/HF06019/HF34430	4	HF37198/HF28596/HF35913/HF28597
BP	GO:0007017	microtubule-based process	20/1994	141/11133	0.901276	1	HF11254/HF40404/HF07243/HF17893/HF12205/HF02669/HF38275/novel.583/HF00242/novel.3649/HF21610/HF33434/HF27396/HF09463/HF00243/HF33440/HF15891/HF19091/HF13161/HF18595	-/-/-/-/-/-/-/-/-/-/-/-/-/-/-/-/-/-/-/-	20	15	HF40404/HF07243/HF17893/HF12205/HF38275/novel.583/HF00242/novel.3649/HF33434/HF09463/HF00243/HF33440/HF15891/HF19091/HF13161	5	HF11254/HF02669/HF21610/HF27396/HF18595
BP	GO:0006754	ATP biosynthetic process	12/1994	90/11133	0.902831	1	HF42124/HF12314/HF05696/HF37198/HF28596/HF35913/HF37328/HF06019/HF28597/HF34430/HF24277/HF21230	-/-/-/-/-/-/-/-/-/-/-/-	12	5	HF42124/HF12314/HF37328/HF06019/HF34430	7	HF05696/HF37198/HF28596/HF35913/HF28597/HF24277/HF21230
BP	GO:0000105	histidine biosynthetic process	1/1994	12/11133	0.906486	1	HF40465	-	1	0		1	HF40465
BP	GO:0006098	pentose-phosphate shunt	1/1994	12/11133	0.906486	1	HF07846	-	1	0		1	HF07846
BP	GO:0006487	protein N-linked glycosylation	1/1994	12/11133	0.906486	1	HF35129	-	1	0		1	HF35129
BP	GO:0006541	glutamine metabolic process	1/1994	12/11133	0.906486	1	HF07792	-	1	1	HF07792	0
BP	GO:0006547	histidine metabolic process	1/1994	12/11133	0.906486	1	HF40465	-	1	0		1	HF40465
BP	GO:0009069	serine family amino acid metabolic process	1/1994	12/11133	0.906486	1	HF30930	-	1	0		1	HF30930
BP	GO:0031124	mRNA 3'-end processing	1/1994	12/11133	0.906486	1	HF18961	-	1	0		1	HF18961
BP	GO:0051156	glucose 6-phosphate metabolic process	1/1994	12/11133	0.906486	1	HF07846	-	1	0		1	HF07846
BP	GO:0051235	maintenance of location	1/1994	12/11133	0.906486	1	HF29787	-	1	0		1	HF29787
BP	GO:0051259	protein complex oligomerization	1/1994	12/11133	0.906486	1	HF37654	-	1	1	HF37654	0
BP	GO:0052803	imidazole-containing compound metabolic process	1/1994	12/11133	0.906486	1	HF40465	-	1	0		1	HF40465
BP	GO:0016043	cellular component organization	57/1994	369/11133	0.909182	1	HF34232/HF19108/HF33623/novel.1238/novel.3057/HF19344/HF11083/HF30633/HF00051/HF35864/HF24770/HF37654/HF42023/HF39297/HF41306/HF17199/HF41369/HF00950/HF27204/HF15830/novel.718/HF14176/novel.3377/HF00959/HF12369/HF23736/HF18834/HF04035/HF00242/HF30340/HF26396/HF21878/HF07920/novel.2844/HF25660/HF13920/HF32277/HF33434/HF42048/HF00243/HF33416/novel.719/HF19430/HF29684/HF32864/HF33440/HF16835/HF14581…	-/-/-/-/-/-/-/-/-/-/-/-/-/-/-/-/-/-/-/-/-/-/-/-/-/-/-/-/-/-/-/-/-/-/-/-/-/-/-/-/-/-/-/-/-/-/-/-/-/-/-/-/-/-/-/-/-	57	33	HF19108/novel.1238/novel.3057/HF19344/HF35864/HF37654/HF42023/HF39297/HF17199/HF41369/HF00950/novel.3377/HF00959/HF12369/HF04035/HF00242/HF07920/novel.2844/HF32277/HF33434/HF42048/HF00243/HF33416/HF19430/HF29684/HF32864/HF33440/HF16835/HF14581/HF00958/HF39278/novel.731/HF29692	24	HF34232/HF33623/HF11083/HF30633/HF00051/HF24770/HF41306/HF27204/HF15830/novel.718/HF14176/HF23736/HF18834/HF30340/HF26396/HF21878/HF25660/HF13920/novel.719/HF33318/HF30850/novel.1692/novel.2176/HF23779
BP	GO:0006801	superoxide metabolic process	2/1994	21/11133	0.911735	1	novel.3281/HF03587	-/-	2	1	novel.3281	1	HF03587
BP	GO:0009119	ribonucleoside metabolic process	2/1994	21/11133	0.911735	1	HF26127/HF17525	-/-	2	1	HF17525	1	HF26127
BP	GO:0042398	cellular modified amino acid biosynthetic process	2/1994	21/11133	0.911735	1	HF08410/HF15923	-/-	2	1	HF08410	1	HF15923
BP	GO:0072593	reactive oxygen species metabolic process	2/1994	21/11133	0.911735	1	novel.3281/HF03587	-/-	2	1	novel.3281	1	HF03587
BP	GO:0006497	protein lipidation	3/1994	29/11133	0.913168	1	HF43923/HF19412/HF39677	-/-/-	3	3	HF43923/HF19412/HF39677	0
BP	GO:0006506	GPI anchor biosynthetic process	3/1994	29/11133	0.913168	1	HF43923/HF19412/HF39677	-/-/-	3	3	HF43923/HF19412/HF39677	0
BP	GO:0006661	phosphatidylinositol biosynthetic process	3/1994	29/11133	0.913168	1	HF43923/HF19412/HF39677	-/-/-	3	3	HF43923/HF19412/HF39677	0
BP	GO:0042157	lipoprotein metabolic process	3/1994	29/11133	0.913168	1	HF43923/HF19412/HF39677	-/-/-	3	3	HF43923/HF19412/HF39677	0
BP	GO:0042158	lipoprotein biosynthetic process	3/1994	29/11133	0.913168	1	HF43923/HF19412/HF39677	-/-/-	3	3	HF43923/HF19412/HF39677	0
BP	GO:0072330	monocarboxylic acid biosynthetic process	20/1994	143/11133	0.913626	1	HF26931/HF23511/HF42124/novel.278/HF07750/HF12314/HF37198/HF42120/HF02479/HF28596/HF35913/HF01451/HF06019/HF28597/HF21248/HF34430/HF08475/HF23663/HF24195/HF14447	-/-/-/-/-/-/-/-/-/-/-/-/-/-/-/-/-/-/-/-	20	11	HF42124/HF07750/HF12314/HF02479/HF01451/HF06019/HF21248/HF34430/HF08475/HF24195/HF14447	9	HF26931/HF23511/novel.278/HF37198/HF42120/HF28596/HF35913/HF28597/HF23663
BP	GO:0006091	generation of precursor metabolites and energy	13/1994	98/11133	0.913712	1	HF42124/HF33623/HF12314/HF37198/HF28596/HF35913/HF13920/HF02735/HF06019/HF28597/HF42246/HF34430/HF07315	-/-/-/-/-/-/-/-/-/-/-/-/-	13	6	HF42124/HF12314/HF02735/HF06019/HF42246/HF34430	7	HF33623/HF37198/HF28596/HF35913/HF13920/HF28597/HF07315
BP	GO:0006281	DNA repair	13/1994	98/11133	0.913712	1	novel.3057/HF25801/HF28512/HF14203/HF36513/HF17984/HF31607/HF03488/HF08790/HF04510/HF37582/HF01279/HF24555	-/-/-/-/-/-/-/-/-/-/-/-/-	13	7	novel.3057/HF28512/HF14203/HF36513/HF03488/HF37582/HF24555	6	HF25801/HF17984/HF31607/HF08790/HF04510/HF01279
BP	GO:0019359	nicotinamide nucleotide biosynthetic process	9/1994	72/11133	0.917783	1	HF42124/HF12314/HF37198/HF28596/HF41386/HF35913/HF06019/HF28597/HF34430	-/-/-/-/-/-/-/-/-	9	4	HF42124/HF12314/HF06019/HF34430	5	HF37198/HF28596/HF41386/HF35913/HF28597
BP	GO:0019363	pyridine nucleotide biosynthetic process	9/1994	72/11133	0.917783	1	HF42124/HF12314/HF37198/HF28596/HF41386/HF35913/HF06019/HF28597/HF34430	-/-/-/-/-/-/-/-/-	9	4	HF42124/HF12314/HF06019/HF34430	5	HF37198/HF28596/HF41386/HF35913/HF28597
BP	GO:0046434	organophosphate catabolic process	9/1994	72/11133	0.917783	1	HF42124/HF12314/HF37198/HF28596/HF38953/HF35913/HF06019/HF28597/HF34430	-/-/-/-/-/-/-/-/-	9	4	HF42124/HF12314/HF06019/HF34430	5	HF37198/HF28596/HF38953/HF35913/HF28597
BP	GO:0009451	RNA modification	6/1994	52/11133	0.923558	1	novel.3247/HF15791/HF30012/HF16005/HF39375/HF17525	-/-/-/-/-/-	6	2	HF15791/HF17525	4	novel.3247/HF30012/HF16005/HF39375
BP	GO:0006165	nucleoside diphosphate phosphorylation	8/1994	67/11133	0.931218	1	HF42124/HF12314/HF37198/HF28596/HF35913/HF06019/HF28597/HF34430	-/-/-/-/-/-/-/-	8	4	HF42124/HF12314/HF06019/HF34430	4	HF37198/HF28596/HF35913/HF28597
BP	GO:0046939	nucleotide phosphorylation	8/1994	67/11133	0.931218	1	HF42124/HF12314/HF37198/HF28596/HF35913/HF06019/HF28597/HF34430	-/-/-/-/-/-/-/-	8	4	HF42124/HF12314/HF06019/HF34430	4	HF37198/HF28596/HF35913/HF28597
BP	GO:0034404	nucleobase-containing small molecule biosynthetic process	9/1994	74/11133	0.932004	1	HF42124/HF12314/HF37198/HF28596/HF35913/HF06019/HF28597/HF34430/HF17525	-/-/-/-/-/-/-/-/-	9	5	HF42124/HF12314/HF06019/HF34430/HF17525	4	HF37198/HF28596/HF35913/HF28597
BP	GO:0006974	cellular response to DNA damage stimulus	13/1994	101/11133	0.932556	1	novel.3057/HF25801/HF28512/HF14203/HF36513/HF17984/HF31607/HF03488/HF08790/HF04510/HF37582/HF01279/HF24555	-/-/-/-/-/-/-/-/-/-/-/-/-	13	7	novel.3057/HF28512/HF14203/HF36513/HF03488/HF37582/HF24555	6	HF25801/HF17984/HF31607/HF08790/HF04510/HF01279
BP	GO:0033554	cellular response to stress	13/1994	101/11133	0.932556	1	novel.3057/HF25801/HF28512/HF14203/HF36513/HF17984/HF31607/HF03488/HF08790/HF04510/HF37582/HF01279/HF24555	-/-/-/-/-/-/-/-/-/-/-/-/-	13	7	novel.3057/HF28512/HF14203/HF36513/HF03488/HF37582/HF24555	6	HF25801/HF17984/HF31607/HF08790/HF04510/HF01279
BP	GO:0006505	GPI anchor metabolic process	3/1994	31/11133	0.934411	1	HF43923/HF19412/HF39677	-/-/-	3	3	HF43923/HF19412/HF39677	0
BP	GO:0046474	glycerophospholipid biosynthetic process	3/1994	31/11133	0.934411	1	HF43923/HF19412/HF39677	-/-/-	3	3	HF43923/HF19412/HF39677	0
BP	GO:0009127	purine nucleoside monophosphate biosynthetic process	12/1994	95/11133	0.936251	1	HF42124/HF12314/HF05696/HF37198/HF28596/HF35913/HF37328/HF06019/HF28597/HF34430/HF24277/HF21230	-/-/-/-/-/-/-/-/-/-/-/-	12	5	HF42124/HF12314/HF37328/HF06019/HF34430	7	HF05696/HF37198/HF28596/HF35913/HF28597/HF24277/HF21230
BP	GO:0009156	ribonucleoside monophosphate biosynthetic process	12/1994	95/11133	0.936251	1	HF42124/HF12314/HF05696/HF37198/HF28596/HF35913/HF37328/HF06019/HF28597/HF34430/HF24277/HF21230	-/-/-/-/-/-/-/-/-/-/-/-	12	5	HF42124/HF12314/HF37328/HF06019/HF34430	7	HF05696/HF37198/HF28596/HF35913/HF28597/HF24277/HF21230
BP	GO:0009168	purine ribonucleoside monophosphate biosynthetic process	12/1994	95/11133	0.936251	1	HF42124/HF12314/HF05696/HF37198/HF28596/HF35913/HF37328/HF06019/HF28597/HF34430/HF24277/HF21230	-/-/-/-/-/-/-/-/-/-/-/-	12	5	HF42124/HF12314/HF37328/HF06019/HF34430	7	HF05696/HF37198/HF28596/HF35913/HF28597/HF24277/HF21230
BP	GO:0019682	glyceraldehyde-3-phosphate metabolic process	1/1994	14/11133	0.937015	1	HF07846	-	1	0		1	HF07846
BP	GO:0042559	pteridine-containing compound biosynthetic process	1/1994	14/11133	0.937015	1	HF11858	-	1	0		1	HF11858
BP	GO:0008033	tRNA processing	7/1994	61/11133	0.937936	1	HF32072/HF06252/HF27131/HF39375/novel.1645/HF06270/HF17525	-/-/-/-/-/-/-	7	3	novel.1645/HF06270/HF17525	4	HF32072/HF06252/HF27131/HF39375
BP	GO:0044085	cellular component biogenesis	32/1994	224/11133	0.938756	1	HF33623/novel.1238/HF19344/HF00051/HF35864/HF37654/HF24821/HF42711/HF39297/HF41306/HF17199/HF12789/HF39239/HF22390/HF30012/HF04035/HF00242/HF26396/novel.2331/HF13920/HF33434/HF42048/HF00243/HF33416/HF19430/HF29684/HF32864/HF33440/HF14581/HF33318/HF39278/novel.2176	-/-/-/-/-/-/-/-/-/-/-/-/-/-/-/-/-/-/-/-/-/-/-/-/-/-/-/-/-/-/-/-	32	22	novel.1238/HF19344/HF35864/HF37654/HF24821/HF42711/HF39297/HF17199/HF12789/HF39239/HF04035/HF00242/HF33434/HF42048/HF00243/HF33416/HF19430/HF29684/HF32864/HF33440/HF14581/HF39278	10	HF33623/HF00051/HF41306/HF22390/HF30012/HF26396/novel.2331/HF13920/HF33318/novel.2176
BP	GO:0030001	metal ion transport	30/1994	212/11133	0.940713	1	HF38080/HF29360/HF13511/novel.694/HF19721/HF09568/HF03283/HF11571/HF08487/HF02812/HF42895/HF23038/HF39148/HF33978/HF23063/HF15057/HF40223/HF20851/HF26901/HF02610/HF01535/HF24630/HF12755/HF17231/HF08391/HF04181/novel.2110/HF42088/HF28285/HF44457	-/-/-/-/-/-/-/-/-/-/-/-/-/-/-/-/-/-/-/-/-/-/-/-/-/-/-/-/-/-	30	14	HF29360/HF13511/HF08487/HF02812/HF42895/HF23038/HF39148/HF33978/HF23063/HF01535/HF12755/HF08391/HF04181/novel.2110	16	HF38080/novel.694/HF19721/HF09568/HF03283/HF11571/HF15057/HF40223/HF20851/HF26901/HF02610/HF24630/HF17231/HF42088/HF28285/HF44457
BP	GO:0009142	nucleoside triphosphate biosynthetic process	12/1994	96/11133	0.941594	1	HF42124/HF12314/HF05696/HF37198/HF28596/HF35913/HF37328/HF06019/HF28597/HF34430/HF24277/HF21230	-/-/-/-/-/-/-/-/-/-/-/-	12	5	HF42124/HF12314/HF37328/HF06019/HF34430	7	HF05696/HF37198/HF28596/HF35913/HF28597/HF24277/HF21230
BP	GO:0009145	purine nucleoside triphosphate biosynthetic process	12/1994	96/11133	0.941594	1	HF42124/HF12314/HF05696/HF37198/HF28596/HF35913/HF37328/HF06019/HF28597/HF34430/HF24277/HF21230	-/-/-/-/-/-/-/-/-/-/-/-	12	5	HF42124/HF12314/HF37328/HF06019/HF34430	7	HF05696/HF37198/HF28596/HF35913/HF28597/HF24277/HF21230
BP	GO:0009201	ribonucleoside triphosphate biosynthetic process	12/1994	96/11133	0.941594	1	HF42124/HF12314/HF05696/HF37198/HF28596/HF35913/HF37328/HF06019/HF28597/HF34430/HF24277/HF21230	-/-/-/-/-/-/-/-/-/-/-/-	12	5	HF42124/HF12314/HF37328/HF06019/HF34430	7	HF05696/HF37198/HF28596/HF35913/HF28597/HF24277/HF21230
BP	GO:0009206	purine ribonucleoside triphosphate biosynthetic process	12/1994	96/11133	0.941594	1	HF42124/HF12314/HF05696/HF37198/HF28596/HF35913/HF37328/HF06019/HF28597/HF34430/HF24277/HF21230	-/-/-/-/-/-/-/-/-/-/-/-	12	5	HF42124/HF12314/HF37328/HF06019/HF34430	7	HF05696/HF37198/HF28596/HF35913/HF28597/HF24277/HF21230
BP	GO:0043038	amino acid activation	12/1994	96/11133	0.941594	1	HF11614/HF11599/novel.703/HF17700/HF24139/HF12187/HF29738/HF30655/HF11624/HF12188/HF04547/HF29280	-/-/-/-/-/-/-/-/-/-/-/-	12	3	HF24139/HF30655/HF04547	9	HF11614/HF11599/novel.703/HF17700/HF12187/HF29738/HF11624/HF12188/HF29280
BP	GO:0043039	tRNA aminoacylation	12/1994	96/11133	0.941594	1	HF11614/HF11599/novel.703/HF17700/HF24139/HF12187/HF29738/HF30655/HF11624/HF12188/HF04547/HF29280	-/-/-/-/-/-/-/-/-/-/-/-	12	3	HF24139/HF30655/HF04547	9	HF11614/HF11599/novel.703/HF17700/HF12187/HF29738/HF11624/HF12188/HF29280
BP	GO:0071804	cellular potassium ion transport	3/1994	32/11133	0.943131	1	HF09568/HF42895/HF23063	-/-/-	3	2	HF42895/HF23063	1	HF09568
BP	GO:0071805	potassium ion transmembrane transport	3/1994	32/11133	0.943131	1	HF09568/HF42895/HF23063	-/-/-	3	2	HF42895/HF23063	1	HF09568
BP	GO:0098656	anion transmembrane transport	3/1994	32/11133	0.943131	1	HF36070/HF41468/HF23029	-/-/-	3	2	HF36070/HF23029	1	HF41468
BP	GO:1903825	organic acid transmembrane transport	3/1994	32/11133	0.943131	1	HF36070/HF41468/HF23029	-/-/-	3	2	HF36070/HF23029	1	HF41468
BP	GO:1905039	carboxylic acid transmembrane transport	3/1994	32/11133	0.943131	1	HF36070/HF41468/HF23029	-/-/-	3	2	HF36070/HF23029	1	HF41468
BP	GO:0006352	DNA-templated transcription, initiation	4/1994	40/11133	0.944585	1	HF25943/HF26161/HF33799/HF12967	-/-/-/-	4	1	HF33799	3	HF25943/HF26161/HF12967
BP	GO:0006418	tRNA aminoacylation for protein translation	11/1994	90/11133	0.945473	1	HF11614/HF11599/novel.703/HF17700/HF24139/HF29738/HF30655/HF11624/HF12188/HF04547/HF29280	-/-/-/-/-/-/-/-/-/-/-	11	3	HF24139/HF30655/HF04547	8	HF11614/HF11599/novel.703/HF17700/HF29738/HF11624/HF12188/HF29280
BP	GO:0048285	organelle fission	2/1994	24/11133	0.945502	1	HF41369/HF30340	-/-	2	1	HF41369	1	HF30340
BP	GO:0043933	protein-containing complex subunit organization	15/1994	117/11133	0.946252	1	HF33623/novel.1238/HF19344/HF35864/HF37654/HF39297/HF17199/HF26396/HF13920/HF42048/HF19430/HF32864/HF14581/HF39278/novel.2176	-/-/-/-/-/-/-/-/-/-/-/-/-/-/-	15	11	novel.1238/HF19344/HF35864/HF37654/HF39297/HF17199/HF42048/HF19430/HF32864/HF14581/HF39278	4	HF33623/HF26396/HF13920/novel.2176
BP	GO:0006996	organelle organization	28/1994	201/11133	0.946419	1	novel.3057/HF19344/HF11083/HF35864/HF24770/HF42023/HF39297/HF17199/HF41369/HF27204/HF14176/novel.3377/HF12369/HF00242/HF30340/HF21878/novel.2844/HF32277/HF33434/HF42048/HF00243/HF19430/HF32864/HF33440/HF16835/HF14581/HF39278/novel.1692	-/-/-/-/-/-/-/-/-/-/-/-/-/-/-/-/-/-/-/-/-/-/-/-/-/-/-/-	28	21	novel.3057/HF19344/HF35864/HF42023/HF39297/HF17199/HF41369/novel.3377/HF12369/HF00242/novel.2844/HF32277/HF33434/HF42048/HF00243/HF19430/HF32864/HF33440/HF16835/HF14581/HF39278	7	HF11083/HF24770/HF27204/HF14176/HF30340/HF21878/novel.1692
BP	GO:0009124	nucleoside monophosphate biosynthetic process	12/1994	97/11133	0.946545	1	HF42124/HF12314/HF05696/HF37198/HF28596/HF35913/HF37328/HF06019/HF28597/HF34430/HF24277/HF21230	-/-/-/-/-/-/-/-/-/-/-/-	12	5	HF42124/HF12314/HF37328/HF06019/HF34430	7	HF05696/HF37198/HF28596/HF35913/HF28597/HF24277/HF21230
BP	GO:0008272	sulfate transport	1/1994	15/11133	0.94831	1	HF17231	-	1	0		1	HF17231
BP	GO:0009084	glutamine family amino acid biosynthetic process	1/1994	15/11133	0.94831	1	HF04674	-	1	0		1	HF04674
BP	GO:0072348	sulfur compound transport	1/1994	15/11133	0.94831	1	HF17231	-	1	0		1	HF17231
BP	GO:0019362	pyridine nucleotide metabolic process	10/1994	84/11133	0.949657	1	HF42124/HF12314/HF37198/HF28596/HF41386/HF35913/HF06019/HF28597/HF34430/HF07846	-/-/-/-/-/-/-/-/-/-	10	4	HF42124/HF12314/HF06019/HF34430	6	HF37198/HF28596/HF41386/HF35913/HF28597/HF07846
BP	GO:0046496	nicotinamide nucleotide metabolic process	10/1994	84/11133	0.949657	1	HF42124/HF12314/HF37198/HF28596/HF41386/HF35913/HF06019/HF28597/HF34430/HF07846	-/-/-/-/-/-/-/-/-/-	10	4	HF42124/HF12314/HF06019/HF34430	6	HF37198/HF28596/HF41386/HF35913/HF28597/HF07846
BP	GO:0045017	glycerolipid biosynthetic process	4/1994	41/11133	0.951421	1	HF43923/HF19412/HF39677/HF32368	-/-/-/-	4	4	HF43923/HF19412/HF39677/HF32368	0
BP	GO:0006732	coenzyme metabolic process	19/1994	145/11133	0.95289	1	HF42124/HF06210/novel.1238/HF37694/HF12314/HF15418/HF37198/HF11858/HF28596/HF41386/HF28414/HF35913/HF06019/HF14104/HF28597/HF40472/HF34430/HF07846/HF43686	-/-/-/-/-/-/-/-/-/-/-/-/-/-/-/-/-/-/-	19	5	HF42124/novel.1238/HF12314/HF06019/HF34430	14	HF06210/HF37694/HF15418/HF37198/HF11858/HF28596/HF41386/HF28414/HF35913/HF14104/HF28597/HF40472/HF07846/HF43686
BP	GO:0006888	ER to Golgi vesicle-mediated transport	2/1994	25/11133	0.953715	1	HF38047/HF31333	-/-	2	1	HF31333	1	HF38047
BP	GO:0006074	(1->3)-beta-D-glucan metabolic process	1/1994	16/11133	0.957581	1	HF29069	-	1	0		1	HF29069
BP	GO:0006075	(1->3)-beta-D-glucan biosynthetic process	1/1994	16/11133	0.957581	1	HF29069	-	1	0		1	HF29069
BP	GO:0006904	vesicle docking involved in exocytosis	1/1994	16/11133	0.957581	1	HF24961	-	1	1	HF24961	0
BP	GO:0042278	purine nucleoside metabolic process	1/1994	16/11133	0.957581	1	HF26127	-	1	0		1	HF26127
BP	GO:0046128	purine ribonucleoside metabolic process	1/1994	16/11133	0.957581	1	HF26127	-	1	0		1	HF26127
BP	GO:0140029	exocytic process	1/1994	16/11133	0.957581	1	HF24961	-	1	1	HF24961	0
BP	GO:1901068	guanosine-containing compound metabolic process	1/1994	16/11133	0.957581	1	HF26127	-	1	0		1	HF26127
BP	GO:0044283	small molecule biosynthetic process	42/1994	293/11133	0.958037	1	HF17735/HF26931/HF23511/HF42124/HF06210/novel.278/HF07750/HF37694/HF32087/HF34596/HF12314/HF15418/HF30930/HF44388/HF42711/HF37198/HF42120/HF41914/HF02479/HF11858/HF39239/HF28596/HF06279/HF30157/HF35913/HF40942/HF40465/HF26149/HF01451/HF06019/HF14104/HF28597/HF14442/HF21248/HF40472/HF34430/HF04674/HF08475/HF23663/HF24195/HF14447/HF17525	-/-/-/-/-/-/-/-/-/-/-/-/-/-/-/-/-/-/-/-/-/-/-/-/-/-/-/-/-/-/-/-/-/-/-/-/-/-/-/-/-/-	42	20	HF17735/HF42124/HF07750/HF34596/HF12314/HF44388/HF42711/HF02479/HF39239/HF06279/HF30157/HF01451/HF06019/HF14442/HF21248/HF34430/HF08475/HF24195/HF14447/HF17525	22	HF26931/HF23511/HF06210/novel.278/HF37694/HF32087/HF15418/HF30930/HF37198/HF42120/HF41914/HF11858/HF28596/HF35913/HF40942/HF40465/HF26149/HF14104/HF28597/HF40472/HF04674/HF23663
BP	GO:1901605	alpha-amino acid metabolic process	9/1994	79/11133	0.958585	1	HF17735/HF30930/HF18323/HF06279/HF25408/HF40465/HF14442/HF04674/HF07792	-/-/-/-/-/-/-/-/-	9	5	HF17735/HF18323/HF06279/HF14442/HF07792	4	HF30930/HF25408/HF40465/HF04674
BP	GO:0070647	protein modification by small protein conjugation or removal	19/1994	147/11133	0.959591	1	HF26036/HF01818/HF22631/HF22234/HF41158/HF42005/HF07357/HF18154/HF05433/HF35547/HF09147/HF32203/HF36171/HF42084/HF20925/HF17856/HF31919/HF22722/HF42296	-/-/-/-/-/-/-/-/-/-/-/-/-/-/-/-/-/-/-	19	6	HF05433/HF35547/HF36171/HF20925/HF17856/HF42296	13	HF26036/HF01818/HF22631/HF22234/HF41158/HF42005/HF07357/HF18154/HF09147/HF32203/HF42084/HF31919/HF22722
BP	GO:0051276	chromosome organization	14/1994	114/11133	0.960666	1	novel.3057/HF19344/HF11083/HF35864/HF24770/HF41369/HF27204/HF14176/HF30340/HF21878/HF32277/HF42048/HF32864/HF16835	-/-/-/-/-/-/-/-/-/-/-/-/-/-	14	8	novel.3057/HF19344/HF35864/HF41369/HF32277/HF42048/HF32864/HF16835	6	HF11083/HF24770/HF27204/HF14176/HF30340/HF21878
BP	GO:0000375	RNA splicing, via transesterification reactions	2/1994	26/11133	0.960736	1	novel.1238/novel.2176	-/-	2	1	novel.1238	1	novel.2176
BP	GO:0000377	RNA splicing, via transesterification reactions with bulged adenosine as nucleophile	2/1994	26/11133	0.960736	1	novel.1238/novel.2176	-/-	2	1	novel.1238	1	novel.2176
BP	GO:0000398	mRNA splicing, via spliceosome	2/1994	26/11133	0.960736	1	novel.1238/novel.2176	-/-	2	1	novel.1238	1	novel.2176
BP	GO:0006733	oxidoreduction coenzyme metabolic process	10/1994	87/11133	0.962446	1	HF42124/HF12314/HF37198/HF28596/HF41386/HF35913/HF06019/HF28597/HF34430/HF07846	-/-/-/-/-/-/-/-/-/-	10	4	HF42124/HF12314/HF06019/HF34430	6	HF37198/HF28596/HF41386/HF35913/HF28597/HF07846
BP	GO:0046488	phosphatidylinositol metabolic process	7/1994	66/11133	0.964175	1	HF43923/HF19412/HF04538/HF17917/HF39677/HF44237/HF12326	-/-/-/-/-/-/-	7	4	HF43923/HF19412/HF39677/HF12326	3	HF04538/HF17917/HF44237
BP	GO:0006221	pyrimidine nucleotide biosynthetic process	1/1994	17/11133	0.965189	1	HF21303	-	1	0		1	HF21303
BP	GO:0006739	NADP metabolic process	1/1994	17/11133	0.965189	1	HF07846	-	1	0		1	HF07846
BP	GO:0007005	mitochondrion organization	1/1994	17/11133	0.965189	1	novel.2844	-	1	1	novel.2844	0
BP	GO:0009067	aspartate family amino acid biosynthetic process	1/1994	17/11133	0.965189	1	HF14442	-	1	1	HF14442	0
BP	GO:0042558	pteridine-containing compound metabolic process	1/1994	17/11133	0.965189	1	HF11858	-	1	0		1	HF11858
BP	GO:0046034	ATP metabolic process	12/1994	102/11133	0.966185	1	HF42124/HF12314/HF05696/HF37198/HF28596/HF35913/HF37328/HF06019/HF28597/HF34430/HF24277/HF21230	-/-/-/-/-/-/-/-/-/-/-/-	12	5	HF42124/HF12314/HF37328/HF06019/HF34430	7	HF05696/HF37198/HF28596/HF35913/HF28597/HF24277/HF21230
BP	GO:0006813	potassium ion transport	3/1994	36/11133	0.968305	1	HF09568/HF42895/HF23063	-/-/-	3	2	HF42895/HF23063	1	HF09568
BP	GO:0072657	protein localization to membrane	3/1994	36/11133	0.968305	1	HF34232/novel.2844/HF14792	-/-/-	3	1	novel.2844	2	HF34232/HF14792
BP	GO:0090150	establishment of protein localization to membrane	3/1994	36/11133	0.968305	1	HF34232/novel.2844/HF14792	-/-/-	3	1	novel.2844	2	HF34232/HF14792
BP	GO:0016485	protein processing	1/1994	18/11133	0.971434	1	HF44346	-	1	1	HF44346	0
BP	GO:0022406	membrane docking	1/1994	18/11133	0.971434	1	HF24961	-	1	1	HF24961	0
BP	GO:0048278	vesicle docking	1/1994	18/11133	0.971434	1	HF24961	-	1	1	HF24961	0
BP	GO:0051640	organelle localization	1/1994	18/11133	0.971434	1	HF24961	-	1	1	HF24961	0
BP	GO:0140056	organelle localization by membrane tethering	1/1994	18/11133	0.971434	1	HF24961	-	1	1	HF24961	0
BP	GO:0006650	glycerophospholipid metabolic process	7/1994	68/11133	0.971485	1	HF43923/HF19412/HF04538/HF17917/HF39677/HF44237/HF12326	-/-/-/-/-/-/-	7	4	HF43923/HF19412/HF39677/HF12326	3	HF04538/HF17917/HF44237
BP	GO:0003333	amino acid transmembrane transport	2/1994	28/11133	0.971834	1	HF36070/HF23029	-/-	2	2	HF36070/HF23029	0
BP	GO:0006865	amino acid transport	2/1994	28/11133	0.971834	1	HF36070/HF23029	-/-	2	2	HF36070/HF23029	0
BP	GO:0009247	glycolipid biosynthetic process	3/1994	37/11133	0.972701	1	HF43923/HF19412/HF39677	-/-/-	3	3	HF43923/HF19412/HF39677	0
BP	GO:0046467	membrane lipid biosynthetic process	3/1994	37/11133	0.972701	1	HF43923/HF19412/HF39677	-/-/-	3	3	HF43923/HF19412/HF39677	0
BP	GO:1902600	proton transmembrane transport	6/1994	61/11133	0.97313	1	HF05696/HF37328/HF15622/HF37943/HF24277/HF21230	-/-/-/-/-/-	6	3	HF37328/HF15622/HF37943	3	HF05696/HF24277/HF21230
BP	GO:0006928	movement of cell or subcellular component	12/1994	105/11133	0.974602	1	HF11254/HF40404/HF07243/HF12205/HF02669/HF38275/HF21610/HF27396/HF09463/HF15891/HF19091/HF13161	-/-/-/-/-/-/-/-/-/-/-/-	12	8	HF40404/HF07243/HF12205/HF38275/HF09463/HF15891/HF19091/HF13161	4	HF11254/HF02669/HF21610/HF27396
BP	GO:0007018	microtubule-based movement	12/1994	105/11133	0.974602	1	HF11254/HF40404/HF07243/HF12205/HF02669/HF38275/HF21610/HF27396/HF09463/HF15891/HF19091/HF13161	-/-/-/-/-/-/-/-/-/-/-/-	12	8	HF40404/HF07243/HF12205/HF38275/HF09463/HF15891/HF19091/HF13161	4	HF11254/HF02669/HF21610/HF27396
BP	GO:0034470	ncRNA processing	12/1994	105/11133	0.974602	1	HF32072/HF12789/HF06252/HF25578/HF27131/HF22390/novel.2331/HF39375/novel.1645/HF06270/HF25582/HF17525	-/-/-/-/-/-/-/-/-/-/-/-	12	6	HF12789/HF25578/novel.1645/HF06270/HF25582/HF17525	6	HF32072/HF06252/HF27131/HF22390/novel.2331/HF39375
BP	GO:0009141	nucleoside triphosphate metabolic process	13/1994	112/11133	0.97467	1	HF42124/HF12314/HF05696/HF37198/HF28596/HF35913/HF37328/HF06019/HF28597/HF34430/HF21155/HF24277/HF21230	-/-/-/-/-/-/-/-/-/-/-/-/-	13	6	HF42124/HF12314/HF37328/HF06019/HF34430/HF21155	7	HF05696/HF37198/HF28596/HF35913/HF28597/HF24277/HF21230
BP	GO:0006812	cation transport	50/1994	352/11133	0.974769	1	HF38080/HF29360/HF13511/HF43202/HF05696/HF15920/HF39705/novel.694/HF19721/HF25447/HF05645/HF09568/HF03283/HF20883/HF30133/HF11571/HF12553/HF08487/HF02812/HF42895/HF37328/HF23038/HF39148/HF28356/HF33978/HF23063/HF15057/HF40223/HF27944/HF19491/HF08541/HF15622/HF20851/HF26901/HF06794/HF02610/HF01535/HF24630/HF37943/HF12755/HF17231/HF08391/HF04181/HF24277/novel.2110/HF21230/HF42088/HF28285/HF26664/HF…	-/-/-/-/-/-/-/-/-/-/-/-/-/-/-/-/-/-/-/-/-/-/-/-/-/-/-/-/-/-/-/-/-/-/-/-/-/-/-/-/-/-/-/-/-/-/-/-/-/-	50	23	HF29360/HF13511/HF15920/HF25447/HF30133/HF08487/HF02812/HF42895/HF37328/HF23038/HF39148/HF33978/HF23063/HF27944/HF19491/HF08541/HF15622/HF01535/HF37943/HF12755/HF08391/HF04181/novel.2110	27	HF38080/HF43202/HF05696/HF39705/novel.694/HF19721/HF05645/HF09568/HF03283/HF20883/HF11571/HF12553/HF28356/HF15057/HF40223/HF20851/HF26901/HF06794/HF02610/HF24630/HF17231/HF24277/HF21230/HF42088/HF28285/HF26664/HF44457
BP	GO:0044255	cellular lipid metabolic process	32/1994	239/11133	0.976345	1	HF03066/HF26931/HF23511/HF28156/novel.278/HF07750/novel.2917/novel.2828/novel.1210/HF09500/HF15138/HF42120/HF02479/HF12386/HF18284/HF43923/HF19412/HF01451/HF04538/HF26676/HF24586/HF17917/HF21248/HF05901/HF39677/HF44237/HF08475/HF32368/HF23663/HF24195/HF14447/HF12326	-/-/-/-/-/-/-/-/-/-/-/-/-/-/-/-/-/-/-/-/-/-/-/-/-/-/-/-/-/-/-/-	32	16	HF07750/novel.1210/HF15138/HF02479/HF12386/HF43923/HF19412/HF01451/HF21248/HF05901/HF39677/HF08475/HF32368/HF24195/HF14447/HF12326	16	HF03066/HF26931/HF23511/HF28156/novel.278/novel.2917/novel.2828/HF09500/HF42120/HF18284/HF04538/HF26676/HF24586/HF17917/HF44237/HF23663
BP	GO:0071840	cellular component organization or biogenesis	64/1994	441/11133	0.977371	1	HF34232/HF19108/HF33623/novel.1238/novel.3057/HF19344/HF11083/HF30633/HF00051/HF35864/HF24770/HF37654/HF24821/HF42711/HF42023/HF39297/HF41306/HF17199/HF41369/HF00950/HF27204/HF15830/HF12789/novel.718/HF39239/HF14176/novel.3377/HF00959/HF12369/HF22390/HF23736/HF30012/HF18834/HF04035/HF00242/HF30340/HF26396/novel.2331/HF21878/HF07920/novel.2844/HF25660/HF13920/HF32277/HF33434/HF42048/HF00243/HF3341…	-/-/-/-/-/-/-/-/-/-/-/-/-/-/-/-/-/-/-/-/-/-/-/-/-/-/-/-/-/-/-/-/-/-/-/-/-/-/-/-/-/-/-/-/-/-/-/-/-/-/-/-/-/-/-/-/-/-/-/-/-/-/-/-	64	37	HF19108/novel.1238/novel.3057/HF19344/HF35864/HF37654/HF24821/HF42711/HF42023/HF39297/HF17199/HF41369/HF00950/HF12789/HF39239/novel.3377/HF00959/HF12369/HF04035/HF00242/HF07920/novel.2844/HF32277/HF33434/HF42048/HF00243/HF33416/HF19430/HF29684/HF32864/HF33440/HF16835/HF14581/HF00958/HF39278/novel.731/HF29692	27	HF34232/HF33623/HF11083/HF30633/HF00051/HF24770/HF41306/HF27204/HF15830/novel.718/HF14176/HF22390/HF23736/HF30012/HF18834/HF30340/HF26396/novel.2331/HF21878/HF25660/HF13920/novel.719/HF33318/HF30850/novel.1692/novel.2176/HF23779
BP	GO:1901575	organic substance catabolic process	43/1994	310/11133	0.977548	1	HF37337/HF04141/HF42124/HF06916/HF12314/HF01223/HF09436/HF17970/HF19497/HF36717/HF37198/HF30423/HF30087/HF04121/HF19224/HF13132/HF28596/HF38953/HF39710/HF33039/HF01256/HF04116/HF35913/HF37423/HF30340/HF04150/HF19272/HF06019/HF28597/HF05895/HF19271/HF28207/HF43199/HF36955/HF34430/HF02052/HF31571/HF22882/novel.2945/HF00954/HF04505/HF17912/HF34830	-/-/-/-/-/-/-/-/-/-/-/-/-/-/-/-/-/-/-/-/-/-/-/-/-/-/-/-/-/-/-/-/-/-/-/-/-/-/-/-/-/-/-	43	21	HF42124/HF06916/HF12314/HF17970/HF36717/HF30087/HF13132/HF33039/HF01256/HF37423/HF06019/HF05895/HF28207/HF36955/HF34430/HF22882/novel.2945/HF00954/HF04505/HF17912/HF34830	22	HF37337/HF04141/HF01223/HF09436/HF19497/HF37198/HF30423/HF04121/HF19224/HF28596/HF38953/HF39710/HF04116/HF35913/HF30340/HF04150/HF19272/HF28597/HF19271/HF43199/HF02052/HF31571
BP	GO:0006399	tRNA metabolic process	19/1994	155/11133	0.978775	1	HF32072/HF11614/HF11599/novel.703/HF06252/HF27131/HF17700/HF24139/HF12187/HF29738/HF39375/novel.1645/HF30655/HF06270/HF11624/HF12188/HF04547/HF29280/HF17525	-/-/-/-/-/-/-/-/-/-/-/-/-/-/-/-/-/-/-	19	6	HF24139/novel.1645/HF30655/HF06270/HF04547/HF17525	13	HF32072/HF11614/HF11599/novel.703/HF06252/HF27131/HF17700/HF12187/HF29738/HF39375/HF11624/HF12188/HF29280
BP	GO:0046486	glycerolipid metabolic process	8/1994	78/11133	0.978783	1	HF43923/HF19412/HF04538/HF17917/HF39677/HF44237/HF32368/HF12326	-/-/-/-/-/-/-/-	8	5	HF43923/HF19412/HF39677/HF32368/HF12326	3	HF04538/HF17917/HF44237
BP	GO:1901607	alpha-amino acid biosynthetic process	6/1994	63/11133	0.978984	1	HF17735/HF30930/HF06279/HF40465/HF14442/HF04674	-/-/-/-/-/-	6	3	HF17735/HF06279/HF14442	3	HF30930/HF40465/HF04674
BP	GO:0006164	purine nucleotide biosynthetic process	13/1994	114/11133	0.979051	1	HF10343/HF42124/HF12314/HF05696/HF37198/HF28596/HF35913/HF37328/HF06019/HF28597/HF34430/HF24277/HF21230	-/-/-/-/-/-/-/-/-/-/-/-/-	13	5	HF42124/HF12314/HF37328/HF06019/HF34430	8	HF10343/HF05696/HF37198/HF28596/HF35913/HF28597/HF24277/HF21230
BP	GO:0009126	purine nucleoside monophosphate metabolic process	12/1994	107/11133	0.979109	1	HF42124/HF12314/HF05696/HF37198/HF28596/HF35913/HF37328/HF06019/HF28597/HF34430/HF24277/HF21230	-/-/-/-/-/-/-/-/-/-/-/-	12	5	HF42124/HF12314/HF37328/HF06019/HF34430	7	HF05696/HF37198/HF28596/HF35913/HF28597/HF24277/HF21230
BP	GO:0009161	ribonucleoside monophosphate metabolic process	12/1994	107/11133	0.979109	1	HF42124/HF12314/HF05696/HF37198/HF28596/HF35913/HF37328/HF06019/HF28597/HF34430/HF24277/HF21230	-/-/-/-/-/-/-/-/-/-/-/-	12	5	HF42124/HF12314/HF37328/HF06019/HF34430	7	HF05696/HF37198/HF28596/HF35913/HF28597/HF24277/HF21230
BP	GO:0009167	purine ribonucleoside monophosphate metabolic process	12/1994	107/11133	0.979109	1	HF42124/HF12314/HF05696/HF37198/HF28596/HF35913/HF37328/HF06019/HF28597/HF34430/HF24277/HF21230	-/-/-/-/-/-/-/-/-/-/-/-	12	5	HF42124/HF12314/HF37328/HF06019/HF34430	7	HF05696/HF37198/HF28596/HF35913/HF28597/HF24277/HF21230
BP	GO:0032787	monocarboxylic acid metabolic process	20/1994	162/11133	0.979246	1	HF26931/HF23511/HF42124/novel.278/HF07750/HF12314/HF37198/HF42120/HF02479/HF28596/HF35913/HF01451/HF06019/HF28597/HF21248/HF34430/HF08475/HF23663/HF24195/HF14447	-/-/-/-/-/-/-/-/-/-/-/-/-/-/-/-/-/-/-/-	20	11	HF42124/HF07750/HF12314/HF02479/HF01451/HF06019/HF21248/HF34430/HF08475/HF24195/HF14447	9	HF26931/HF23511/novel.278/HF37198/HF42120/HF28596/HF35913/HF28597/HF23663
BP	GO:0006664	glycolipid metabolic process	3/1994	39/11133	0.979818	1	HF43923/HF19412/HF39677	-/-/-	3	3	HF43923/HF19412/HF39677	0
BP	GO:1903509	liposaccharide metabolic process	3/1994	39/11133	0.979818	1	HF43923/HF19412/HF39677	-/-/-	3	3	HF43923/HF19412/HF39677	0
BP	GO:0006520	cellular amino acid metabolic process	29/1994	222/11133	0.980042	1	HF17735/HF19842/HF11614/HF30930/HF44388/HF11599/novel.1001/novel.703/HF18323/HF30943/HF39240/HF06279/HF17700/HF24139/HF23814/HF40942/HF25408/HF40465/HF14442/HF12187/HF29738/HF04674/HF30655/HF11624/HF12188/HF07792/HF04547/HF11425/HF29280	-/-/-/-/-/-/-/-/-/-/-/-/-/-/-/-/-/-/-/-/-/-/-/-/-/-/-/-/-	29	11	HF17735/HF19842/HF44388/HF18323/HF39240/HF06279/HF24139/HF14442/HF30655/HF07792/HF04547	18	HF11614/HF30930/HF11599/novel.1001/novel.703/HF30943/HF17700/HF23814/HF40942/HF25408/HF40465/HF12187/HF29738/HF04674/HF11624/HF12188/HF11425/HF29280
BP	GO:0033865	nucleoside bisphosphate metabolic process	1/1994	20/11133	0.980764	1	HF26127	-	1	0		1	HF26127
BP	GO:0033875	ribonucleoside bisphosphate metabolic process	1/1994	20/11133	0.980764	1	HF26127	-	1	0		1	HF26127
BP	GO:0034032	purine nucleoside bisphosphate metabolic process	1/1994	20/11133	0.980764	1	HF26127	-	1	0		1	HF26127
BP	GO:0051604	protein maturation	1/1994	20/11133	0.980764	1	HF44346	-	1	1	HF44346	0
BP	GO:0009152	purine ribonucleotide biosynthetic process	12/1994	108/11133	0.981079	1	HF42124/HF12314/HF05696/HF37198/HF28596/HF35913/HF37328/HF06019/HF28597/HF34430/HF24277/HF21230	-/-/-/-/-/-/-/-/-/-/-/-	12	5	HF42124/HF12314/HF37328/HF06019/HF34430	7	HF05696/HF37198/HF28596/HF35913/HF28597/HF24277/HF21230
BP	GO:0009260	ribonucleotide biosynthetic process	12/1994	108/11133	0.981079	1	HF42124/HF12314/HF05696/HF37198/HF28596/HF35913/HF37328/HF06019/HF28597/HF34430/HF24277/HF21230	-/-/-/-/-/-/-/-/-/-/-/-	12	5	HF42124/HF12314/HF37328/HF06019/HF34430	7	HF05696/HF37198/HF28596/HF35913/HF28597/HF24277/HF21230
BP	GO:0015672	monovalent inorganic cation transport	12/1994	108/11133	0.981079	1	HF05696/HF09568/HF42895/HF37328/HF39148/HF23063/HF15057/HF15622/HF37943/HF24277/novel.2110/HF21230	-/-/-/-/-/-/-/-/-/-/-/-	12	7	HF42895/HF37328/HF39148/HF23063/HF15622/HF37943/novel.2110	5	HF05696/HF09568/HF15057/HF24277/HF21230
BP	GO:0046390	ribose phosphate biosynthetic process	12/1994	108/11133	0.981079	1	HF42124/HF12314/HF05696/HF37198/HF28596/HF35913/HF37328/HF06019/HF28597/HF34430/HF24277/HF21230	-/-/-/-/-/-/-/-/-/-/-/-	12	5	HF42124/HF12314/HF37328/HF06019/HF34430	7	HF05696/HF37198/HF28596/HF35913/HF28597/HF24277/HF21230
BP	GO:0072522	purine-containing compound biosynthetic process	13/1994	116/11133	0.982733	1	HF10343/HF42124/HF12314/HF05696/HF37198/HF28596/HF35913/HF37328/HF06019/HF28597/HF34430/HF24277/HF21230	-/-/-/-/-/-/-/-/-/-/-/-/-	13	5	HF42124/HF12314/HF37328/HF06019/HF34430	8	HF10343/HF05696/HF37198/HF28596/HF35913/HF28597/HF24277/HF21230
BP	GO:0009123	nucleoside monophosphate metabolic process	12/1994	109/11133	0.982877	1	HF42124/HF12314/HF05696/HF37198/HF28596/HF35913/HF37328/HF06019/HF28597/HF34430/HF24277/HF21230	-/-/-/-/-/-/-/-/-/-/-/-	12	5	HF42124/HF12314/HF37328/HF06019/HF34430	7	HF05696/HF37198/HF28596/HF35913/HF28597/HF24277/HF21230
BP	GO:0009144	purine nucleoside triphosphate metabolic process	12/1994	109/11133	0.982877	1	HF42124/HF12314/HF05696/HF37198/HF28596/HF35913/HF37328/HF06019/HF28597/HF34430/HF24277/HF21230	-/-/-/-/-/-/-/-/-/-/-/-	12	5	HF42124/HF12314/HF37328/HF06019/HF34430	7	HF05696/HF37198/HF28596/HF35913/HF28597/HF24277/HF21230
BP	GO:0009199	ribonucleoside triphosphate metabolic process	12/1994	109/11133	0.982877	1	HF42124/HF12314/HF05696/HF37198/HF28596/HF35913/HF37328/HF06019/HF28597/HF34430/HF24277/HF21230	-/-/-/-/-/-/-/-/-/-/-/-	12	5	HF42124/HF12314/HF37328/HF06019/HF34430	7	HF05696/HF37198/HF28596/HF35913/HF28597/HF24277/HF21230
BP	GO:0009205	purine ribonucleoside triphosphate metabolic process	12/1994	109/11133	0.982877	1	HF42124/HF12314/HF05696/HF37198/HF28596/HF35913/HF37328/HF06019/HF28597/HF34430/HF24277/HF21230	-/-/-/-/-/-/-/-/-/-/-/-	12	5	HF42124/HF12314/HF37328/HF06019/HF34430	7	HF05696/HF37198/HF28596/HF35913/HF28597/HF24277/HF21230
BP	GO:0070972	protein localization to endoplasmic reticulum	2/1994	31/11133	0.983009	1	HF14792/HF29787	-/-	2	0		2	HF14792/HF29787
BP	GO:0006357	regulation of transcription by RNA polymerase II	1/1994	21/11133	0.984216	1	HF20528	-	1	0		1	HF20528
BP	GO:0006835	dicarboxylic acid transport	1/1994	21/11133	0.984216	1	HF05844	-	1	1	HF05844	0
BP	GO:0015740	C4-dicarboxylate transport	1/1994	21/11133	0.984216	1	HF05844	-	1	1	HF05844	0
BP	GO:0015743	malate transport	1/1994	21/11133	0.984216	1	HF05844	-	1	1	HF05844	0
BP	GO:0022900	electron transport chain	1/1994	21/11133	0.984216	1	HF07315	-	1	0		1	HF07315
BP	GO:0008652	cellular amino acid biosynthetic process	8/1994	81/11133	0.984948	1	HF17735/HF30930/HF44388/HF06279/HF40942/HF40465/HF14442/HF04674	-/-/-/-/-/-/-/-	8	4	HF17735/HF44388/HF06279/HF14442	4	HF30930/HF40942/HF40465/HF04674
BP	GO:0006479	protein methylation	2/1994	32/11133	0.985667	1	HF43161/HF11685	-/-	2	1	HF11685	1	HF43161
BP	GO:0008213	protein alkylation	2/1994	32/11133	0.985667	1	HF43161/HF11685	-/-	2	1	HF11685	1	HF43161
BP	GO:0000413	protein peptidyl-prolyl isomerization	4/1994	50/11133	0.985973	1	HF41594/HF14531/HF39545/HF31317	-/-/-/-	4	2	HF39545/HF31317	2	HF41594/HF14531
BP	GO:0018208	peptidyl-proline modification	4/1994	50/11133	0.985973	1	HF41594/HF14531/HF39545/HF31317	-/-/-/-	4	2	HF39545/HF31317	2	HF41594/HF14531
BP	GO:0090407	organophosphate biosynthetic process	26/1994	207/11133	0.985976	1	HF10343/HF42124/HF06210/novel.1238/HF37694/HF12314/HF15418/HF05696/HF37198/HF21303/HF28596/HF43923/HF41386/HF28414/HF35913/HF19412/HF37328/HF06019/HF14104/HF28597/HF40472/HF34430/HF39677/HF24277/HF21230/HF43686	-/-/-/-/-/-/-/-/-/-/-/-/-/-/-/-/-/-/-/-/-/-/-/-/-/-	26	9	HF42124/novel.1238/HF12314/HF43923/HF19412/HF37328/HF06019/HF34430/HF39677	17	HF10343/HF06210/HF37694/HF15418/HF05696/HF37198/HF21303/HF28596/HF41386/HF28414/HF35913/HF14104/HF28597/HF40472/HF24277/HF21230/HF43686
BP	GO:0022613	ribonucleoprotein complex biogenesis	8/1994	82/11133	0.986602	1	novel.1238/HF42711/HF12789/HF39239/HF22390/HF30012/novel.2331/novel.2176	-/-/-/-/-/-/-/-	8	4	novel.1238/HF42711/HF12789/HF39239	4	HF22390/HF30012/novel.2331/novel.2176
BP	GO:0006612	protein targeting to membrane	1/1994	22/11133	0.987048	1	HF14792	-	1	0		1	HF14792
BP	GO:0006613	cotranslational protein targeting to membrane	1/1994	22/11133	0.987048	1	HF14792	-	1	0		1	HF14792
BP	GO:0006614	SRP-dependent cotranslational protein targeting to membrane	1/1994	22/11133	0.987048	1	HF14792	-	1	0		1	HF14792
BP	GO:0045047	protein targeting to ER	1/1994	22/11133	0.987048	1	HF14792	-	1	0		1	HF14792
BP	GO:0072599	establishment of protein localization to endoplasmic reticulum	1/1994	22/11133	0.987048	1	HF14792	-	1	0		1	HF14792
BP	GO:0006605	protein targeting	2/1994	33/11133	0.987919	1	novel.2844/HF14792	-/-	2	1	novel.2844	1	HF14792
BP	GO:0006325	chromatin organization	6/1994	68/11133	0.988838	1	HF19344/HF35864/HF24770/HF32277/HF42048/HF32864	-/-/-/-/-/-	6	5	HF19344/HF35864/HF32277/HF42048/HF32864	1	HF24770
BP	GO:0098655	cation transmembrane transport	11/1994	106/11133	0.988933	1	HF38080/HF05696/HF09568/HF42895/HF37328/HF23063/HF40223/HF15622/HF37943/HF24277/HF21230	-/-/-/-/-/-/-/-/-/-/-	11	5	HF42895/HF37328/HF23063/HF15622/HF37943	6	HF38080/HF05696/HF09568/HF40223/HF24277/HF21230
BP	GO:0098660	inorganic ion transmembrane transport	11/1994	106/11133	0.988933	1	HF38080/HF05696/HF09568/HF42895/HF37328/HF23063/HF40223/HF15622/HF37943/HF24277/HF21230	-/-/-/-/-/-/-/-/-/-/-	11	5	HF42895/HF37328/HF23063/HF15622/HF37943	6	HF38080/HF05696/HF09568/HF40223/HF24277/HF21230
BP	GO:0098662	inorganic cation transmembrane transport	11/1994	106/11133	0.988933	1	HF38080/HF05696/HF09568/HF42895/HF37328/HF23063/HF40223/HF15622/HF37943/HF24277/HF21230	-/-/-/-/-/-/-/-/-/-/-	11	5	HF42895/HF37328/HF23063/HF15622/HF37943	6	HF38080/HF05696/HF09568/HF40223/HF24277/HF21230
BP	GO:0006364	rRNA processing	3/1994	43/11133	0.989104	1	HF12789/HF22390/novel.2331	-/-/-	3	1	HF12789	2	HF22390/novel.2331
BP	GO:0016072	rRNA metabolic process	3/1994	43/11133	0.989104	1	HF12789/HF22390/novel.2331	-/-/-	3	1	HF12789	2	HF22390/novel.2331
BP	GO:0043414	macromolecule methylation	3/1994	43/11133	0.989104	1	novel.3247/HF43161/HF11685	-/-/-	3	1	HF11685	2	novel.3247/HF43161
BP	GO:0019637	organophosphate metabolic process	41/1994	309/11133	0.989389	1	HF10343/HF42124/HF06210/novel.1238/HF37694/HF12314/HF15418/HF05696/HF37198/HF26148/HF21303/HF43265/HF26127/HF28596/HF38953/HF43923/HF41386/HF28414/HF35913/HF19412/HF34836/HF37328/HF08098/HF06019/HF14104/HF04538/HF28597/HF17917/HF37266/HF40472/HF34430/HF21155/HF13820/HF39677/HF44237/HF39023/HF07846/HF24277/HF21230/HF43686/HF12326	-/-/-/-/-/-/-/-/-/-/-/-/-/-/-/-/-/-/-/-/-/-/-/-/-/-/-/-/-/-/-/-/-/-/-/-/-/-/-/-/-	41	14	HF42124/novel.1238/HF12314/HF43923/HF19412/HF34836/HF37328/HF08098/HF06019/HF34430/HF21155/HF39677/HF39023/HF12326	27	HF10343/HF06210/HF37694/HF15418/HF05696/HF37198/HF26148/HF21303/HF43265/HF26127/HF28596/HF38953/HF41386/HF28414/HF35913/HF14104/HF04538/HF28597/HF17917/HF37266/HF40472/HF13820/HF44237/HF07846/HF24277/HF21230/HF43686
BP	GO:0009056	catabolic process	43/1994	322/11133	0.989465	1	HF37337/HF04141/HF42124/HF06916/HF12314/HF01223/HF09436/HF17970/HF19497/HF36717/HF37198/HF30423/HF30087/HF04121/HF19224/HF13132/HF28596/HF38953/HF39710/HF33039/HF01256/HF04116/HF35913/HF37423/HF30340/HF04150/HF19272/HF06019/HF28597/HF05895/HF19271/HF28207/HF43199/HF36955/HF34430/HF02052/HF31571/HF22882/novel.2945/HF00954/HF04505/HF17912/HF34830	-/-/-/-/-/-/-/-/-/-/-/-/-/-/-/-/-/-/-/-/-/-/-/-/-/-/-/-/-/-/-/-/-/-/-/-/-/-/-/-/-/-/-	43	21	HF42124/HF06916/HF12314/HF17970/HF36717/HF30087/HF13132/HF33039/HF01256/HF37423/HF06019/HF05895/HF28207/HF36955/HF34430/HF22882/novel.2945/HF00954/HF04505/HF17912/HF34830	22	HF37337/HF04141/HF01223/HF09436/HF19497/HF37198/HF30423/HF04121/HF19224/HF28596/HF38953/HF39710/HF04116/HF35913/HF30340/HF04150/HF19272/HF28597/HF19271/HF43199/HF02052/HF31571
BP	GO:0015988	energy coupled proton transmembrane transport, against electrochemical gradient	2/1994	34/11133	0.989824	1	HF15622/HF37943	-/-	2	2	HF15622/HF37943	0
BP	GO:0015991	ATP hydrolysis coupled proton transport	2/1994	34/11133	0.989824	1	HF15622/HF37943	-/-	2	2	HF15622/HF37943	0
BP	GO:0090662	ATP hydrolysis coupled transmembrane transport	2/1994	34/11133	0.989824	1	HF15622/HF37943	-/-	2	2	HF15622/HF37943	0
BP	GO:0099131	ATP hydrolysis coupled ion transmembrane transport	2/1994	34/11133	0.989824	1	HF15622/HF37943	-/-	2	2	HF15622/HF37943	0
BP	GO:0099132	ATP hydrolysis coupled cation transmembrane transport	2/1994	34/11133	0.989824	1	HF15622/HF37943	-/-	2	2	HF15622/HF37943	0
BP	GO:0034660	ncRNA metabolic process	24/1994	199/11133	0.990907	1	HF32072/HF11614/HF11599/novel.703/HF12789/HF06252/HF25578/HF27131/HF17700/HF22390/HF24139/novel.2331/HF12187/HF29738/HF39375/novel.1645/HF30655/HF06270/HF11624/HF12188/HF25582/HF04547/HF29280/HF17525	-/-/-/-/-/-/-/-/-/-/-/-/-/-/-/-/-/-/-/-/-/-/-/-	24	9	HF12789/HF25578/HF24139/novel.1645/HF30655/HF06270/HF25582/HF04547/HF17525	15	HF32072/HF11614/HF11599/novel.703/HF06252/HF27131/HF17700/HF22390/novel.2331/HF12187/HF29738/HF39375/HF11624/HF12188/HF29280
BP	GO:0015711	organic anion transport	4/1994	53/11133	0.990908	1	HF36070/HF41468/HF23029/HF05844	-/-/-/-	4	3	HF36070/HF23029/HF05844	1	HF41468
BP	GO:0015849	organic acid transport	4/1994	53/11133	0.990908	1	HF36070/HF41468/HF23029/HF05844	-/-/-/-	4	3	HF36070/HF23029/HF05844	1	HF41468
BP	GO:0046942	carboxylic acid transport	4/1994	53/11133	0.990908	1	HF36070/HF41468/HF23029/HF05844	-/-/-/-	4	3	HF36070/HF23029/HF05844	1	HF41468
BP	GO:0006470	protein dephosphorylation	2/1994	35/11133	0.991435	1	HF28279/HF37062	-/-	2	1	HF37062	1	HF28279
BP	GO:0007275	multicellular organism development	2/1994	35/11133	0.991435	1	HF39710/HF05814	-/-	2	0		2	HF39710/HF05814
BP	GO:0016311	dephosphorylation	2/1994	35/11133	0.991435	1	HF28279/HF37062	-/-	2	1	HF37062	1	HF28279
BP	GO:0032502	developmental process	2/1994	35/11133	0.991435	1	HF39710/HF05814	-/-	2	0		2	HF39710/HF05814
BP	GO:0048856	anatomical structure development	2/1994	35/11133	0.991435	1	HF39710/HF05814	-/-	2	0		2	HF39710/HF05814
BP	GO:0006643	membrane lipid metabolic process	3/1994	45/11133	0.992038	1	HF43923/HF19412/HF39677	-/-/-	3	3	HF43923/HF19412/HF39677	0
BP	GO:0055086	nucleobase-containing small molecule metabolic process	27/1994	221/11133	0.992119	1	HF10343/HF42124/HF12314/HF05696/novel.3621/HF37198/HF21303/HF43265/HF26127/HF28596/HF41386/HF24794/HF35913/HF37328/HF06019/HF28597/HF22062/HF34430/HF21155/HF13820/HF39023/HF07846/HF24277/HF37094/HF21230/novel.2757/HF17525	-/-/-/-/-/-/-/-/-/-/-/-/-/-/-/-/-/-/-/-/-/-/-/-/-/-/-	27	10	HF42124/HF12314/HF37328/HF06019/HF34430/HF21155/HF39023/HF37094/novel.2757/HF17525	17	HF10343/HF05696/novel.3621/HF37198/HF21303/HF43265/HF26127/HF28596/HF41386/HF24794/HF35913/HF28597/HF22062/HF13820/HF07846/HF24277/HF21230
BP	GO:0009165	nucleotide biosynthetic process	15/1994	139/11133	0.992728	1	HF10343/HF42124/HF12314/HF05696/HF37198/HF21303/HF28596/HF41386/HF35913/HF37328/HF06019/HF28597/HF34430/HF24277/HF21230	-/-/-/-/-/-/-/-/-/-/-/-/-/-/-	15	5	HF42124/HF12314/HF37328/HF06019/HF34430	10	HF10343/HF05696/HF37198/HF21303/HF28596/HF41386/HF35913/HF28597/HF24277/HF21230
BP	GO:1901293	nucleoside phosphate biosynthetic process	15/1994	139/11133	0.992728	1	HF10343/HF42124/HF12314/HF05696/HF37198/HF21303/HF28596/HF41386/HF35913/HF37328/HF06019/HF28597/HF34430/HF24277/HF21230	-/-/-/-/-/-/-/-/-/-/-/-/-/-/-	15	5	HF42124/HF12314/HF37328/HF06019/HF34430	10	HF10343/HF05696/HF37198/HF21303/HF28596/HF41386/HF35913/HF28597/HF24277/HF21230
BP	GO:0006575	cellular modified amino acid metabolic process	1/1994	25/11133	0.992845	1	HF15923	-	1	0		1	HF15923
BP	GO:0042254	ribosome biogenesis	6/1994	72/11133	0.993387	1	HF42711/HF12789/HF39239/HF22390/HF30012/novel.2331	-/-/-/-/-/-	6	3	HF42711/HF12789/HF39239	3	HF22390/HF30012/novel.2331
BP	GO:0006366	transcription by RNA polymerase II	2/1994	37/11133	0.993944	1	HF24770/HF20528	-/-	2	0		2	HF24770/HF20528
BP	GO:0070085	glycosylation	6/1994	73/11133	0.994211	1	HF05960/HF09500/HF07435/HF29388/HF35129/HF24586	-/-/-/-/-/-	6	1	HF07435	5	HF05960/HF09500/HF29388/HF35129/HF24586
BP	GO:0016053	organic acid biosynthetic process	28/1994	233/11133	0.994851	1	HF17735/HF26931/HF23511/HF42124/novel.278/HF07750/HF12314/HF30930/HF44388/HF37198/HF42120/HF02479/HF28596/HF06279/HF35913/HF40942/HF40465/HF01451/HF06019/HF28597/HF14442/HF21248/HF34430/HF04674/HF08475/HF23663/HF24195/HF14447	-/-/-/-/-/-/-/-/-/-/-/-/-/-/-/-/-/-/-/-/-/-/-/-/-/-/-/-	28	15	HF17735/HF42124/HF07750/HF12314/HF44388/HF02479/HF06279/HF01451/HF06019/HF14442/HF21248/HF34430/HF08475/HF24195/HF14447	13	HF26931/HF23511/novel.278/HF30930/HF37198/HF42120/HF28596/HF35913/HF40942/HF40465/HF28597/HF04674/HF23663
BP	GO:0046394	carboxylic acid biosynthetic process	28/1994	233/11133	0.994851	1	HF17735/HF26931/HF23511/HF42124/novel.278/HF07750/HF12314/HF30930/HF44388/HF37198/HF42120/HF02479/HF28596/HF06279/HF35913/HF40942/HF40465/HF01451/HF06019/HF28597/HF14442/HF21248/HF34430/HF04674/HF08475/HF23663/HF24195/HF14447	-/-/-/-/-/-/-/-/-/-/-/-/-/-/-/-/-/-/-/-/-/-/-/-/-/-/-/-	28	15	HF17735/HF42124/HF07750/HF12314/HF44388/HF02479/HF06279/HF01451/HF06019/HF14442/HF21248/HF34430/HF08475/HF24195/HF14447	13	HF26931/HF23511/novel.278/HF30930/HF37198/HF42120/HF28596/HF35913/HF40942/HF40465/HF28597/HF04674/HF23663
BP	GO:0006413	translational initiation	2/1994	38/11133	0.994912	1	HF18190/HF10726	-/-	2	2	HF18190/HF10726	0
BP	GO:0006753	nucleoside phosphate metabolic process	21/1994	186/11133	0.995314	1	HF10343/HF42124/HF12314/HF05696/HF37198/HF21303/HF43265/HF26127/HF28596/HF41386/HF35913/HF37328/HF06019/HF28597/HF34430/HF21155/HF13820/HF39023/HF07846/HF24277/HF21230	-/-/-/-/-/-/-/-/-/-/-/-/-/-/-/-/-/-/-/-/-	21	7	HF42124/HF12314/HF37328/HF06019/HF34430/HF21155/HF39023	14	HF10343/HF05696/HF37198/HF21303/HF43265/HF26127/HF28596/HF41386/HF35913/HF28597/HF13820/HF07846/HF24277/HF21230
BP	GO:0072594	establishment of protein localization to organelle	2/1994	39/11133	0.995728	1	novel.2844/HF14792	-/-	2	1	novel.2844	1	HF14792
BP	GO:0033365	protein localization to organelle	3/1994	49/11133	0.995789	1	novel.2844/HF14792/HF29787	-/-/-	3	1	novel.2844	2	HF14792/HF29787
BP	GO:0008654	phospholipid biosynthetic process	3/1994	50/11133	0.996416	1	HF43923/HF19412/HF39677	-/-/-	3	3	HF43923/HF19412/HF39677	0
BP	GO:0006163	purine nucleotide metabolic process	14/1994	140/11133	0.996906	1	HF10343/HF42124/HF12314/HF05696/HF37198/HF26127/HF28596/HF35913/HF37328/HF06019/HF28597/HF34430/HF24277/HF21230	-/-/-/-/-/-/-/-/-/-/-/-/-/-	14	5	HF42124/HF12314/HF37328/HF06019/HF34430	9	HF10343/HF05696/HF37198/HF26127/HF28596/HF35913/HF28597/HF24277/HF21230
BP	GO:0034220	ion transmembrane transport	14/1994	140/11133	0.996906	1	HF38080/HF36070/HF05696/HF41468/HF09568/HF23029/HF42895/HF37328/HF23063/HF40223/HF15622/HF37943/HF24277/HF21230	-/-/-/-/-/-/-/-/-/-/-/-/-/-	14	7	HF36070/HF23029/HF42895/HF37328/HF23063/HF15622/HF37943	7	HF38080/HF05696/HF41468/HF09568/HF40223/HF24277/HF21230
BP	GO:0006644	phospholipid metabolic process	7/1994	87/11133	0.997318	1	HF43923/HF19412/HF04538/HF17917/HF39677/HF44237/HF12326	-/-/-/-/-/-/-	7	4	HF43923/HF19412/HF39677/HF12326	3	HF04538/HF17917/HF44237
BP	GO:0009150	purine ribonucleotide metabolic process	13/1994	134/11133	0.997359	1	HF42124/HF12314/HF05696/HF37198/HF26127/HF28596/HF35913/HF37328/HF06019/HF28597/HF34430/HF24277/HF21230	-/-/-/-/-/-/-/-/-/-/-/-/-	13	5	HF42124/HF12314/HF37328/HF06019/HF34430	8	HF05696/HF37198/HF26127/HF28596/HF35913/HF28597/HF24277/HF21230
BP	GO:0009259	ribonucleotide metabolic process	13/1994	134/11133	0.997359	1	HF42124/HF12314/HF05696/HF37198/HF26127/HF28596/HF35913/HF37328/HF06019/HF28597/HF34430/HF24277/HF21230	-/-/-/-/-/-/-/-/-/-/-/-/-	13	5	HF42124/HF12314/HF37328/HF06019/HF34430	8	HF05696/HF37198/HF26127/HF28596/HF35913/HF28597/HF24277/HF21230
BP	GO:0072521	purine-containing compound metabolic process	14/1994	142/11133	0.997506	1	HF10343/HF42124/HF12314/HF05696/HF37198/HF26127/HF28596/HF35913/HF37328/HF06019/HF28597/HF34430/HF24277/HF21230	-/-/-/-/-/-/-/-/-/-/-/-/-/-	14	5	HF42124/HF12314/HF37328/HF06019/HF34430	9	HF10343/HF05696/HF37198/HF26127/HF28596/HF35913/HF28597/HF24277/HF21230
BP	GO:0006457	protein folding	15/1994	150/11133	0.997656	1	HF21006/HF15792/novel.3351/HF41594/HF28522/HF06959/HF03443/HF18300/HF08797/HF18041/HF00881/HF14531/HF39545/HF31317/HF25885	-/-/-/-/-/-/-/-/-/-/-/-/-/-/-	15	10	HF21006/HF15792/novel.3351/HF28522/HF08797/HF18041/HF00881/HF39545/HF31317/HF25885	5	HF41594/HF06959/HF03443/HF18300/HF14531
BP	GO:0016569	covalent chromatin modification	1/1994	32/11133	0.99821	1	HF24770	-	1	0		1	HF24770
BP	GO:0016570	histone modification	1/1994	32/11133	0.99821	1	HF24770	-	1	0		1	HF24770
BP	GO:0006486	protein glycosylation	4/1994	64/11133	0.998262	1	HF05960/HF07435/HF29388/HF35129	-/-/-/-	4	1	HF07435	3	HF05960/HF29388/HF35129
BP	GO:0043413	macromolecule glycosylation	4/1994	64/11133	0.998262	1	HF05960/HF07435/HF29388/HF35129	-/-/-/-	4	1	HF07435	3	HF05960/HF29388/HF35129
BP	GO:0043436	oxoacid metabolic process	55/1994	427/11133	0.99832	1	HF17735/HF26931/HF23511/HF42124/novel.278/HF07750/HF12314/HF44501/HF19842/HF11614/HF30930/HF44388/HF11599/novel.1001/novel.703/HF37198/HF42120/HF18323/HF02479/HF30943/HF39240/HF28596/HF06279/HF17700/HF15125/HF35913/HF24139/HF23814/HF40942/HF25408/HF40465/HF07561/HF01451/HF02735/HF06019/HF28597/HF42246/HF14442/HF21248/HF34430/HF12187/HF29738/HF04674/HF30655/HF11624/HF12188/HF08475/HF08006/HF07792/…	-/-/-/-/-/-/-/-/-/-/-/-/-/-/-/-/-/-/-/-/-/-/-/-/-/-/-/-/-/-/-/-/-/-/-/-/-/-/-/-/-/-/-/-/-/-/-/-/-/-/-/-/-/-/-	55	25	HF17735/HF42124/HF07750/HF12314/HF19842/HF44388/HF18323/HF02479/HF39240/HF06279/HF15125/HF24139/HF01451/HF02735/HF06019/HF42246/HF14442/HF21248/HF34430/HF30655/HF08475/HF07792/HF04547/HF24195/HF14447	30	HF26931/HF23511/novel.278/HF44501/HF11614/HF30930/HF11599/novel.1001/novel.703/HF37198/HF42120/HF30943/HF28596/HF17700/HF35913/HF23814/HF40942/HF25408/HF40465/HF07561/HF28597/HF12187/HF29738/HF04674/HF11624/HF12188/HF08006/HF11425/HF29280/HF23663
BP	GO:0006511	ubiquitin-dependent protein catabolic process	8/1994	99/11133	0.99837	1	HF06916/HF39710/HF01256/HF37423/HF30340/HF19272/HF19271/HF22882	-/-/-/-/-/-/-/-	8	4	HF06916/HF01256/HF37423/HF22882	4	HF39710/HF30340/HF19272/HF19271
BP	GO:0019941	modification-dependent protein catabolic process	8/1994	99/11133	0.99837	1	HF06916/HF39710/HF01256/HF37423/HF30340/HF19272/HF19271/HF22882	-/-/-/-/-/-/-/-	8	4	HF06916/HF01256/HF37423/HF22882	4	HF39710/HF30340/HF19272/HF19271
BP	GO:0043632	modification-dependent macromolecule catabolic process	8/1994	99/11133	0.99837	1	HF06916/HF39710/HF01256/HF37423/HF30340/HF19272/HF19271/HF22882	-/-/-/-/-/-/-/-	8	4	HF06916/HF01256/HF37423/HF22882	4	HF39710/HF30340/HF19272/HF19271
BP	GO:0019693	ribose phosphate metabolic process	14/1994	146/11133	0.998391	1	HF42124/HF12314/HF05696/HF37198/HF26127/HF28596/HF35913/HF37328/HF06019/HF28597/HF34430/HF07846/HF24277/HF21230	-/-/-/-/-/-/-/-/-/-/-/-/-/-	14	5	HF42124/HF12314/HF37328/HF06019/HF34430	9	HF05696/HF37198/HF26127/HF28596/HF35913/HF28597/HF07846/HF24277/HF21230
BP	GO:0006082	organic acid metabolic process	55/1994	428/11133	0.998433	1	HF17735/HF26931/HF23511/HF42124/novel.278/HF07750/HF12314/HF44501/HF19842/HF11614/HF30930/HF44388/HF11599/novel.1001/novel.703/HF37198/HF42120/HF18323/HF02479/HF30943/HF39240/HF28596/HF06279/HF17700/HF15125/HF35913/HF24139/HF23814/HF40942/HF25408/HF40465/HF07561/HF01451/HF02735/HF06019/HF28597/HF42246/HF14442/HF21248/HF34430/HF12187/HF29738/HF04674/HF30655/HF11624/HF12188/HF08475/HF08006/HF07792/…	-/-/-/-/-/-/-/-/-/-/-/-/-/-/-/-/-/-/-/-/-/-/-/-/-/-/-/-/-/-/-/-/-/-/-/-/-/-/-/-/-/-/-/-/-/-/-/-/-/-/-/-/-/-/-	55	25	HF17735/HF42124/HF07750/HF12314/HF19842/HF44388/HF18323/HF02479/HF39240/HF06279/HF15125/HF24139/HF01451/HF02735/HF06019/HF42246/HF14442/HF21248/HF34430/HF30655/HF08475/HF07792/HF04547/HF24195/HF14447	30	HF26931/HF23511/novel.278/HF44501/HF11614/HF30930/HF11599/novel.1001/novel.703/HF37198/HF42120/HF30943/HF28596/HF17700/HF35913/HF23814/HF40942/HF25408/HF40465/HF07561/HF28597/HF12187/HF29738/HF04674/HF11624/HF12188/HF08006/HF11425/HF29280/HF23663
BP	GO:0019752	carboxylic acid metabolic process	54/1994	423/11133	0.998593	1	HF17735/HF26931/HF23511/HF42124/novel.278/HF07750/HF12314/HF19842/HF11614/HF30930/HF44388/HF11599/novel.1001/novel.703/HF37198/HF42120/HF18323/HF02479/HF30943/HF39240/HF28596/HF06279/HF17700/HF15125/HF35913/HF24139/HF23814/HF40942/HF25408/HF40465/HF07561/HF01451/HF02735/HF06019/HF28597/HF42246/HF14442/HF21248/HF34430/HF12187/HF29738/HF04674/HF30655/HF11624/HF12188/HF08475/HF08006/HF07792/HF04547/…	-/-/-/-/-/-/-/-/-/-/-/-/-/-/-/-/-/-/-/-/-/-/-/-/-/-/-/-/-/-/-/-/-/-/-/-/-/-/-/-/-/-/-/-/-/-/-/-/-/-/-/-/-/-	54	25	HF17735/HF42124/HF07750/HF12314/HF19842/HF44388/HF18323/HF02479/HF39240/HF06279/HF15125/HF24139/HF01451/HF02735/HF06019/HF42246/HF14442/HF21248/HF34430/HF30655/HF08475/HF07792/HF04547/HF24195/HF14447	29	HF26931/HF23511/novel.278/HF11614/HF30930/HF11599/novel.1001/novel.703/HF37198/HF42120/HF30943/HF28596/HF17700/HF35913/HF23814/HF40942/HF25408/HF40465/HF07561/HF28597/HF12187/HF29738/HF04674/HF11624/HF12188/HF08006/HF11425/HF29280/HF23663
BP	GO:0044265	cellular macromolecule catabolic process	13/1994	140/11133	0.998655	1	HF06916/HF39710/HF33039/HF01256/HF37423/HF30340/HF19272/HF05895/HF19271/HF22882/HF04505/HF17912/HF34830	-/-/-/-/-/-/-/-/-/-/-/-/-	13	9	HF06916/HF33039/HF01256/HF37423/HF05895/HF22882/HF04505/HF17912/HF34830	4	HF39710/HF30340/HF19272/HF19271
BP	GO:0009117	nucleotide metabolic process	18/1994	182/11133	0.99917	1	HF10343/HF42124/HF12314/HF05696/HF37198/HF21303/HF26127/HF28596/HF41386/HF35913/HF37328/HF06019/HF28597/HF34430/HF21155/HF07846/HF24277/HF21230	-/-/-/-/-/-/-/-/-/-/-/-/-/-/-/-/-/-	18	6	HF42124/HF12314/HF37328/HF06019/HF34430/HF21155	12	HF10343/HF05696/HF37198/HF21303/HF26127/HF28596/HF41386/HF35913/HF28597/HF07846/HF24277/HF21230
BP	GO:0048193	Golgi vesicle transport	2/1994	49/11133	0.999276	1	HF38047/HF31333	-/-	2	1	HF31333	1	HF38047
BP	GO:0009100	glycoprotein metabolic process	4/1994	70/11133	0.999319	1	HF05960/HF07435/HF29388/HF35129	-/-/-/-	4	1	HF07435	3	HF05960/HF29388/HF35129
BP	GO:0009101	glycoprotein biosynthetic process	4/1994	70/11133	0.999319	1	HF05960/HF07435/HF29388/HF35129	-/-/-/-	4	1	HF07435	3	HF05960/HF29388/HF35129
BP	GO:0006397	mRNA processing	4/1994	71/11133	0.999419	1	novel.1238/HF28279/HF18961/novel.2176	-/-/-/-	4	1	novel.1238	3	HF28279/HF18961/novel.2176
BP	GO:0016071	mRNA metabolic process	5/1994	81/11133	0.999468	1	novel.1238/HF28279/HF18961/HF05895/novel.2176	-/-/-/-/-	5	2	novel.1238/HF05895	3	HF28279/HF18961/novel.2176
BP	GO:1901565	organonitrogen compound catabolic process	14/1994	157/11133	0.999541	1	HF06916/HF09436/HF30423/HF19224/HF39710/HF01256/HF37423/HF30340/HF19272/HF19271/HF28207/HF31571/HF22882/HF00954	-/-/-/-/-/-/-/-/-/-/-/-/-/-	14	6	HF06916/HF01256/HF37423/HF28207/HF22882/HF00954	8	HF09436/HF30423/HF19224/HF39710/HF30340/HF19272/HF19271/HF31571
BP	GO:0006508	proteolysis	57/1994	467/11133	0.999762	1	HF06373/HF41921/HF09309/HF24711/HF24813/HF20945/HF25024/HF21630/HF06916/HF13661/HF08133/HF25700/HF19024/novel.1289/HF32192/HF11750/HF41663/HF08055/HF39710/HF33722/novel.1397/HF39916/HF01256/HF37423/HF18181/HF30340/HF05567/HF08144/HF44346/HF20959/HF40628/HF21709/novel.1856/HF33184/novel.1935/HF42860/HF19272/novel.3483/HF21714/HF06899/HF22665/HF10637/HF19271/HF16798/HF25262/HF22882/HF20406/HF18695/…	-/-/-/-/-/-/-/-/-/-/-/-/-/-/-/-/-/-/-/-/-/-/-/-/-/-/-/-/-/-/-/-/-/-/-/-/-/-/-/-/-/-/-/-/-/-/-/-/-/-/-/-/-/-/-/-/-	57	26	HF41921/HF25024/HF21630/HF06916/HF25700/HF19024/novel.1289/HF41663/HF08055/novel.1397/HF39916/HF01256/HF37423/HF18181/HF44346/HF20959/HF40628/HF33184/HF42860/novel.3483/HF21714/HF22882/HF18695/HF05433/HF40234/HF19110	31	HF06373/HF09309/HF24711/HF24813/HF20945/HF13661/HF08133/HF32192/HF11750/HF39710/HF33722/HF30340/HF05567/HF08144/HF21709/novel.1856/novel.1935/HF19272/HF06899/HF22665/HF10637/HF19271/HF16798/HF25262/HF20406/HF31608/HF06213/HF07877/HF22722/HF27222/HF24923
BP	GO:0016579	protein deubiquitination	2/1994	56/11133	0.999796	1	HF05433/HF22722	-/-	2	1	HF05433	1	HF22722
BP	GO:0070646	protein modification by small protein removal	2/1994	56/11133	0.999796	1	HF05433/HF22722	-/-	2	1	HF05433	1	HF22722
BP	GO:0044248	cellular catabolic process	26/1994	256/11133	0.999827	1	HF42124/HF06916/HF12314/HF37198/HF30423/HF19224/HF28596/HF39710/HF33039/HF01256/HF35913/HF37423/HF30340/HF19272/HF06019/HF28597/HF05895/HF19271/HF28207/HF34430/HF31571/HF22882/HF00954/HF04505/HF17912/HF34830	-/-/-/-/-/-/-/-/-/-/-/-/-/-/-/-/-/-/-/-/-/-/-/-/-/-	26	15	HF42124/HF06916/HF12314/HF33039/HF01256/HF37423/HF06019/HF05895/HF28207/HF34430/HF22882/HF00954/HF04505/HF17912/HF34830	11	HF37198/HF30423/HF19224/HF28596/HF39710/HF35913/HF30340/HF19272/HF28597/HF19271/HF31571
BP	GO:0035556	intracellular signal transduction	20/1994	212/11133	0.999836	1	HF24233/HF26066/HF23348/HF42003/HF25077/HF44623/HF31807/HF05645/HF18059/HF09331/HF22590/HF24818/HF18728/HF40108/HF28642/HF28327/HF27151/novel.2671/HF03585/HF15717	-/-/-/-/-/-/-/-/-/-/-/-/-/-/-/-/-/-/-/-	20	10	HF31807/HF18059/HF09331/HF22590/HF24818/HF18728/HF40108/HF27151/HF03585/HF15717	10	HF24233/HF26066/HF23348/HF42003/HF25077/HF44623/HF05645/HF28642/HF28327/novel.2671
BP	GO:0030163	protein catabolic process	9/1994	126/11133	0.999865	1	HF06916/HF09436/HF39710/HF01256/HF37423/HF30340/HF19272/HF19271/HF22882	-/-/-/-/-/-/-/-/-	9	4	HF06916/HF01256/HF37423/HF22882	5	HF09436/HF39710/HF30340/HF19272/HF19271
BP	GO:0044257	cellular protein catabolic process	8/1994	119/11133	0.999893	1	HF06916/HF39710/HF01256/HF37423/HF30340/HF19272/HF19271/HF22882	-/-/-/-/-/-/-/-	8	4	HF06916/HF01256/HF37423/HF22882	4	HF39710/HF30340/HF19272/HF19271
BP	GO:0051603	proteolysis involved in cellular protein catabolic process	8/1994	119/11133	0.999893	1	HF06916/HF39710/HF01256/HF37423/HF30340/HF19272/HF19271/HF22882	-/-/-/-/-/-/-/-	8	4	HF06916/HF01256/HF37423/HF22882	4	HF39710/HF30340/HF19272/HF19271
BP	GO:0018193	peptidyl-amino acid modification	4/1994	82/11133	0.999902	1	HF41594/HF14531/HF39545/HF31317	-/-/-/-	4	2	HF39545/HF31317	2	HF41594/HF14531
BP	GO:1901137	carbohydrate derivative biosynthetic process	20/1994	222/11133	0.999946	1	HF05960/HF42124/HF12314/HF05696/HF37198/HF28596/HF43923/HF07435/HF35913/HF19412/HF29388/HF35129/HF37328/HF06019/HF28597/HF34430/HF39677/HF24277/HF21230/HF17525	-/-/-/-/-/-/-/-/-/-/-/-/-/-/-/-/-/-/-/-	20	10	HF42124/HF12314/HF43923/HF07435/HF19412/HF37328/HF06019/HF34430/HF39677/HF17525	10	HF05960/HF05696/HF37198/HF28596/HF35913/HF29388/HF35129/HF28597/HF24277/HF21230
BP	GO:0007264	small GTPase mediated signal transduction	8/1994	124/11133	0.999948	1	HF31807/HF18059/HF22590/HF18728/HF40108/HF28642/HF03585/HF15717	-/-/-/-/-/-/-/-	8	7	HF31807/HF18059/HF22590/HF18728/HF40108/HF03585/HF15717	1	HF28642
BP	GO:1901135	carbohydrate derivative metabolic process	32/1994	319/11133	0.999975	1	HF05960/HF42124/HF12314/HF05696/novel.3621/HF37198/HF19224/HF26127/HF28596/HF38953/HF43923/HF07435/HF24794/HF35913/HF19412/HF29388/HF35129/HF37328/HF06019/HF28597/HF22062/HF34430/HF31571/HF21155/HF00954/HF39677/HF07846/HF24277/HF37094/HF21230/novel.2757/HF17525	-/-/-/-/-/-/-/-/-/-/-/-/-/-/-/-/-/-/-/-/-/-/-/-/-/-/-/-/-/-/-/-	32	14	HF42124/HF12314/HF43923/HF07435/HF19412/HF37328/HF06019/HF34430/HF21155/HF00954/HF39677/HF37094/novel.2757/HF17525	18	HF05960/HF05696/novel.3621/HF37198/HF19224/HF26127/HF28596/HF38953/HF24794/HF35913/HF29388/HF35129/HF28597/HF22062/HF31571/HF07846/HF24277/HF21230
BP	GO:0016192	vesicle-mediated transport	18/1994	219/11133	0.999988	1	HF11031/HF38047/HF31333/HF24961/HF32886/HF27996/novel.2375/novel.2754/HF23181/HF28755/HF20150/HF04719/HF36105/HF19866/HF34165/HF40037/HF28990/novel.3606	-/-/-/-/-/-/-/-/-/-/-/-/-/-/-/-/-/-	18	11	HF11031/HF31333/HF24961/HF32886/novel.2375/novel.2754/HF23181/HF36105/HF19866/HF28990/novel.3606	7	HF38047/HF27996/HF28755/HF20150/HF04719/HF34165/HF40037
BP	GO:0006396	RNA processing	19/1994	247/11133	0.999999	1	novel.3247/HF32072/novel.1238/HF28279/HF12789/HF06252/HF25578/HF27131/HF22390/HF18961/novel.2331/HF39375/novel.1645/HF06270/HF25582/HF11321/novel.2176/HF26691/HF17525	-/-/-/-/-/-/-/-/-/-/-/-/-/-/-/-/-/-/-	19	8	novel.1238/HF12789/HF25578/novel.1645/HF06270/HF25582/HF11321/HF17525	11	novel.3247/HF32072/HF28279/HF06252/HF27131/HF22390/HF18961/novel.2331/HF39375/novel.2176/HF26691
BP	GO:0071705	nitrogen compound transport	17/1994	259/11133	1	1	HF09067/HF31333/HF36070/HF11083/HF41384/novel.2375/HF30133/HF23029/novel.2754/HF23181/novel.2844/HF39251/HF19491/HF14792/HF06674/HF16570/HF22134	-/-/-/-/-/-/-/-/-/-/-/-/-/-/-/-/-	17	9	HF31333/HF36070/novel.2375/HF30133/HF23029/novel.2754/HF23181/novel.2844/HF19491	8	HF09067/HF11083/HF41384/HF39251/HF14792/HF06674/HF16570/HF22134
BP	GO:0033036	macromolecule localization	16/1994	255/11133	1	1	HF34232/HF31333/HF11083/novel.2375/novel.2754/HF23181/novel.2844/HF39251/HF09856/HF14792/HF06674/HF09911/HF29787/HF16570/HF22134/HF11951	-/-/-/-/-/-/-/-/-/-/-/-/-/-/-/-	16	6	HF31333/novel.2375/novel.2754/HF23181/novel.2844/HF09856	10	HF34232/HF11083/HF39251/HF14792/HF06674/HF09911/HF29787/HF16570/HF22134/HF11951
BP	GO:0008104	protein localization	13/1994	233/11133	1	1	HF34232/HF31333/HF11083/novel.2375/novel.2754/HF23181/novel.2844/HF39251/HF14792/HF06674/HF29787/HF16570/HF22134	-/-/-/-/-/-/-/-/-/-/-/-/-	13	5	HF31333/novel.2375/novel.2754/HF23181/novel.2844	8	HF34232/HF11083/HF39251/HF14792/HF06674/HF29787/HF16570/HF22134
BP	GO:0034613	cellular protein localization	8/1994	185/11133	1	1	HF34232/HF31333/HF11083/novel.2375/HF23181/novel.2844/HF14792/HF29787	-/-/-/-/-/-/-/-	8	4	HF31333/novel.2375/HF23181/novel.2844	4	HF34232/HF11083/HF14792/HF29787
BP	GO:0070727	cellular macromolecule localization	8/1994	185/11133	1	1	HF34232/HF31333/HF11083/novel.2375/HF23181/novel.2844/HF14792/HF29787	-/-/-/-/-/-/-/-	8	4	HF31333/novel.2375/HF23181/novel.2844	4	HF34232/HF11083/HF14792/HF29787
BP	GO:0046907	intracellular transport	8/1994	186/11133	1	1	HF38047/HF31333/HF11083/novel.2375/novel.2754/HF23181/novel.2844/HF14792	-/-/-/-/-/-/-/-	8	5	HF31333/novel.2375/novel.2754/HF23181/novel.2844	3	HF38047/HF11083/HF14792
BP	GO:0051649	establishment of localization in cell	8/1994	186/11133	1	1	HF38047/HF31333/HF11083/novel.2375/novel.2754/HF23181/novel.2844/HF14792	-/-/-/-/-/-/-/-	8	5	HF31333/novel.2375/novel.2754/HF23181/novel.2844	3	HF38047/HF11083/HF14792
BP	GO:0045184	establishment of protein localization	12/1994	226/11133	1	1	HF34232/HF31333/HF11083/novel.2375/novel.2754/HF23181/novel.2844/HF39251/HF14792/HF06674/HF16570/HF22134	-/-/-/-/-/-/-/-/-/-/-/-	12	5	HF31333/novel.2375/novel.2754/HF23181/novel.2844	7	HF34232/HF11083/HF39251/HF14792/HF06674/HF16570/HF22134
BP	GO:0015031	protein transport	11/1994	217/11133	1	1	HF31333/HF11083/novel.2375/novel.2754/HF23181/novel.2844/HF39251/HF14792/HF06674/HF16570/HF22134	-/-/-/-/-/-/-/-/-/-/-	11	5	HF31333/novel.2375/novel.2754/HF23181/novel.2844	6	HF11083/HF39251/HF14792/HF06674/HF16570/HF22134
BP	GO:0015833	peptide transport	11/1994	217/11133	1	1	HF31333/HF11083/novel.2375/novel.2754/HF23181/novel.2844/HF39251/HF14792/HF06674/HF16570/HF22134	-/-/-/-/-/-/-/-/-/-/-	11	5	HF31333/novel.2375/novel.2754/HF23181/novel.2844	6	HF11083/HF39251/HF14792/HF06674/HF16570/HF22134
BP	GO:0042886	amide transport	11/1994	217/11133	1	1	HF31333/HF11083/novel.2375/novel.2754/HF23181/novel.2844/HF39251/HF14792/HF06674/HF16570/HF22134	-/-/-/-/-/-/-/-/-/-/-	11	5	HF31333/novel.2375/novel.2754/HF23181/novel.2844	6	HF11083/HF39251/HF14792/HF06674/HF16570/HF22134
BP	GO:0071702	organic substance transport	20/1994	300/11133	1	1	HF31333/HF36070/HF11083/HF41468/novel.2375/HF23029/novel.2754/HF23181/novel.2844/HF41837/HF39251/HF09856/HF05844/HF14792/HF06674/HF09911/HF10626/HF16570/HF22134/HF11951	-/-/-/-/-/-/-/-/-/-/-/-/-/-/-/-/-/-/-/-	20	11	HF31333/HF36070/novel.2375/HF23029/novel.2754/HF23181/novel.2844/HF41837/HF09856/HF05844/HF10626	9	HF11083/HF41468/HF39251/HF14792/HF06674/HF09911/HF16570/HF22134/HF11951
BP	GO:0006886	intracellular protein transport	6/1994	167/11133	1	1	HF31333/HF11083/novel.2375/HF23181/novel.2844/HF14792	-/-/-/-/-/-	6	4	HF31333/novel.2375/HF23181/novel.2844	2	HF11083/HF14792
BP	GO:0051641	cellular localization	11/1994	222/11133	1	1	HF34232/HF38047/HF31333/HF11083/HF24961/novel.2375/novel.2754/HF23181/novel.2844/HF14792/HF29787	-/-/-/-/-/-/-/-/-/-/-	11	6	HF31333/HF24961/novel.2375/novel.2754/HF23181/novel.2844	5	HF34232/HF38047/HF11083/HF14792/HF29787
CC	GO:0005618	cell wall	26/585	95/4112	0.000523101	0.038971	HF00861/HF19108/HF33666/HF30633/HF29041/HF02157/HF41998/HF07358/HF00950/HF15830/novel.718/HF16214/HF00959/HF23736/HF18834/HF07920/HF25660/novel.719/HF29450/HF04907/HF02449/HF00958/HF30850/novel.731/HF23779/HF29692	-/-/-/-/-/-/-/-/-/-/-/-/-/-/-/-/-/-/-/-/-/-/-/-/-/-	26	16	HF00861/HF19108/HF33666/HF29041/HF02157/HF41998/HF07358/HF00950/HF00959/HF07920/HF29450/HF04907/HF02449/HF00958/novel.731/HF29692	10	HF30633/HF15830/novel.718/HF16214/HF23736/HF18834/HF25660/novel.719/HF30850/HF23779
CC	GO:0030312	external encapsulating structure	26/585	95/4112	0.000523101	0.038971	HF00861/HF19108/HF33666/HF30633/HF29041/HF02157/HF41998/HF07358/HF00950/HF15830/novel.718/HF16214/HF00959/HF23736/HF18834/HF07920/HF25660/novel.719/HF29450/HF04907/HF02449/HF00958/HF30850/novel.731/HF23779/HF29692	-/-/-/-/-/-/-/-/-/-/-/-/-/-/-/-/-/-/-/-/-/-/-/-/-/-	26	16	HF00861/HF19108/HF33666/HF29041/HF02157/HF41998/HF07358/HF00950/HF00959/HF07920/HF29450/HF04907/HF02449/HF00958/novel.731/HF29692	10	HF30633/HF15830/novel.718/HF16214/HF23736/HF18834/HF25660/novel.719/HF30850/HF23779
CC	GO:0005576	extracellular region	14/585	44/4112	0.00222014	0.110267	HF00861/HF33666/HF29041/HF02157/HF41998/HF07358/HF16214/HF05567/HF33184/HF08114/HF29450/HF04907/HF02449/HF24923	-/-/-/-/-/-/-/-/-/-/-/-/-/-	14	10	HF00861/HF33666/HF29041/HF02157/HF41998/HF07358/HF33184/HF29450/HF04907/HF02449	4	HF16214/HF05567/HF08114/HF24923
CC	GO:0048046	apoplast	10/585	28/4112	0.00367906	0.137045	HF00861/HF33666/HF29041/HF02157/HF41998/HF07358/HF16214/HF29450/HF04907/HF02449	-/-/-/-/-/-/-/-/-/-	10	9	HF00861/HF33666/HF29041/HF02157/HF41998/HF07358/HF29450/HF04907/HF02449	1	HF16214
CC	GO:0071944	cell periphery	36/585	168/4112	0.00623701	0.185863	HF00861/HF19108/HF33666/HF30633/HF29041/HF02157/HF29069/HF41998/HF07358/HF00950/HF15830/novel.718/HF16214/HF27996/novel.2375/HF00959/HF23736/HF18834/HF07920/HF25660/HF21935/HF04719/novel.719/HF34165/HF29450/HF04907/HF02449/HF11479/HF00958/HF30850/HF40037/novel.3606/novel.731/HF13999/HF23779/HF29692	-/-/-/-/-/-/-/-/-/-/-/-/-/-/-/-/-/-/-/-/-/-/-/-/-/-/-/-/-/-/-/-/-/-/-/-	36	20	HF00861/HF19108/HF33666/HF29041/HF02157/HF41998/HF07358/HF00950/novel.2375/HF00959/HF07920/HF29450/HF04907/HF02449/HF11479/HF00958/novel.3606/novel.731/HF13999/HF29692	16	HF30633/HF29069/HF15830/novel.718/HF16214/HF27996/HF23736/HF18834/HF25660/HF21935/HF04719/novel.719/HF34165/HF30850/HF40037/HF23779
CC	GO:0005875	microtubule associated complex	8/585	25/4112	0.0186412	0.462922	HF17893/novel.583/HF00242/novel.3649/HF33434/HF00243/HF33440/HF18595	-/-/-/-/-/-/-/-	8	7	HF17893/novel.583/HF00242/novel.3649/HF33434/HF00243/HF33440	1	HF18595
CC	GO:0000152	nuclear ubiquitin ligase complex	4/585	12/4112	0.078413	1	HF41369/HF30340/HF15708/HF12808	-/-/-/-	4	2	HF41369/HF15708	2	HF30340/HF12808
CC	GO:0005680	anaphase-promoting complex	4/585	12/4112	0.078413	1	HF41369/HF30340/HF15708/HF12808	-/-/-/-	4	2	HF41369/HF15708	2	HF30340/HF12808
CC	GO:0031461	cullin-RING ubiquitin ligase complex	4/585	12/4112	0.078413	1	HF41369/HF30340/HF15708/HF12808	-/-/-/-	4	2	HF41369/HF15708	2	HF30340/HF12808
CC	GO:0044430	cytoskeletal part	15/585	72/4112	0.0785012	1	HF39297/HF17199/HF41914/HF17893/novel.583/HF00242/novel.3649/HF33434/HF00243/HF19430/HF33440/HF14581/HF35014/HF39278/HF18595	-/-/-/-/-/-/-/-/-/-/-/-/-/-/-	15	13	HF39297/HF17199/HF17893/novel.583/HF00242/novel.3649/HF33434/HF00243/HF19430/HF33440/HF14581/HF35014/HF39278	2	HF41914/HF18595
CC	GO:0005856	cytoskeleton	15/585	74/4112	0.0949742	1	HF39297/HF17199/HF41914/HF17893/novel.583/HF00242/novel.3649/HF33434/HF00243/HF19430/HF33440/HF14581/HF35014/HF39278/HF18595	-/-/-/-/-/-/-/-/-/-/-/-/-/-/-	15	13	HF39297/HF17199/HF17893/novel.583/HF00242/novel.3649/HF33434/HF00243/HF19430/HF33440/HF14581/HF35014/HF39278	2	HF41914/HF18595
CC	GO:0015630	microtubule cytoskeleton	8/585	36/4112	0.129112	1	HF17893/novel.583/HF00242/novel.3649/HF33434/HF00243/HF33440/HF18595	-/-/-/-/-/-/-/-	8	7	HF17893/novel.583/HF00242/novel.3649/HF33434/HF00243/HF33440	1	HF18595
CC	GO:0000151	ubiquitin ligase complex	4/585	15/4112	0.153813	1	HF41369/HF30340/HF15708/HF12808	-/-/-/-	4	2	HF41369/HF15708	2	HF30340/HF12808
CC	GO:0005885	Arp2/3 protein complex	3/585	10/4112	0.159914	1	HF17199/HF19430/HF14581	-/-/-	3	3	HF17199/HF19430/HF14581	0
CC	GO:0032993	protein-DNA complex	5/585	23/4112	0.220966	1	HF19344/HF35864/HF42048/HF15824/HF32864	-/-/-/-/-	5	5	HF19344/HF35864/HF42048/HF15824/HF32864	0
CC	GO:0009523	photosystem II	8/585	42/4112	0.240281	1	HF29954/HF21418/HF16885/HF10990/HF42420/HF06997/HF30777/HF39128	-/-/-/-/-/-/-/-	8	2	HF16885/HF30777	6	HF29954/HF21418/HF10990/HF42420/HF06997/HF39128
CC	GO:0015629	actin cytoskeleton	7/585	36/4112	0.244314	1	HF39297/HF17199/HF41914/HF19430/HF14581/HF35014/HF39278	-/-/-/-/-/-/-	7	6	HF39297/HF17199/HF19430/HF14581/HF35014/HF39278	1	HF41914
CC	GO:0000786	nucleosome	4/585	21/4112	0.34923	1	HF19344/HF35864/HF42048/HF32864	-/-/-/-	4	4	HF19344/HF35864/HF42048/HF32864	0
CC	GO:0009521	photosystem	10/585	61/4112	0.366163	1	HF29954/HF21418/HF16885/HF10990/HF42420/HF06997/novel.2710/HF30777/HF23131/HF39128	-/-/-/-/-/-/-/-/-/-	10	4	HF16885/novel.2710/HF30777/HF23131	6	HF29954/HF21418/HF10990/HF42420/HF06997/HF39128
CC	GO:0000228	nuclear chromosome	4/585	23/4112	0.417985	1	HF32994/HF23259/HF16914/HF15824	-/-/-/-	4	3	HF23259/HF16914/HF15824	1	HF32994
CC	GO:0005685	U1 snRNP	2/585	10/4112	0.427092	1	novel.1238/novel.2176	-/-	2	1	novel.1238	1	novel.2176
CC	GO:0005759	mitochondrial matrix	2/585	10/4112	0.427092	1	HF43745/HF13370	-/-	2	2	HF43745/HF13370	0
CC	GO:0030532	small nuclear ribonucleoprotein complex	2/585	10/4112	0.427092	1	novel.1238/novel.2176	-/-	2	1	novel.1238	1	novel.2176
CC	GO:0097525	spliceosomal snRNP complex	2/585	10/4112	0.427092	1	novel.1238/novel.2176	-/-	2	1	novel.1238	1	novel.2176
CC	GO:0120114	Sm-like protein family complex	2/585	10/4112	0.427092	1	novel.1238/novel.2176	-/-	2	1	novel.1238	1	novel.2176
CC	GO:0034357	photosynthetic membrane	10/585	64/4112	0.427235	1	HF29954/HF21418/HF16885/HF10990/HF42420/HF06997/novel.2710/HF30777/HF23131/HF39128	-/-/-/-/-/-/-/-/-/-	10	4	HF16885/novel.2710/HF30777/HF23131	6	HF29954/HF21418/HF10990/HF42420/HF06997/HF39128
CC	GO:0009579	thylakoid	10/585	66/4112	0.467874	1	HF29954/HF21418/HF16885/HF10990/HF42420/HF06997/novel.2710/HF30777/HF23131/HF39128	-/-/-/-/-/-/-/-/-/-	10	4	HF16885/novel.2710/HF30777/HF23131	6	HF29954/HF21418/HF10990/HF42420/HF06997/HF39128
CC	GO:0044436	thylakoid part	10/585	66/4112	0.467874	1	HF29954/HF21418/HF16885/HF10990/HF42420/HF06997/novel.2710/HF30777/HF23131/HF39128	-/-/-/-/-/-/-/-/-/-	10	4	HF16885/novel.2710/HF30777/HF23131	6	HF29954/HF21418/HF10990/HF42420/HF06997/HF39128
CC	GO:0005730	nucleolus	2/585	11/4112	0.478026	1	HF42711/HF39239	-/-	2	2	HF42711/HF39239	0
CC	GO:0009507	chloroplast	2/585	11/4112	0.478026	1	HF12593/HF33514	-/-	2	1	HF33514	1	HF12593
CC	GO:0009536	plastid	2/585	11/4112	0.478026	1	HF12593/HF33514	-/-	2	1	HF33514	1	HF12593
CC	GO:0031225	anchored component of membrane	3/585	18/4112	0.482796	1	HF33416/HF29684/HF11479	-/-/-	3	3	HF33416/HF29684/HF11479	0
CC	GO:0000145	exocyst	5/585	32/4112	0.48612	1	HF27996/HF04719/HF34165/HF40037/novel.3606	-/-/-/-/-	5	1	novel.3606	4	HF27996/HF04719/HF34165/HF40037
CC	GO:0005938	cell cortex	5/585	32/4112	0.48612	1	HF27996/HF04719/HF34165/HF40037/novel.3606	-/-/-/-/-	5	1	novel.3606	4	HF27996/HF04719/HF34165/HF40037
CC	GO:0044448	cell cortex part	5/585	32/4112	0.48612	1	HF27996/HF04719/HF34165/HF40037/novel.3606	-/-/-/-/-	5	1	novel.3606	4	HF27996/HF04719/HF34165/HF40037
CC	GO:0099568	cytoplasmic region	5/585	32/4112	0.48612	1	HF27996/HF04719/HF34165/HF40037/novel.3606	-/-/-/-/-	5	1	novel.3606	4	HF27996/HF04719/HF34165/HF40037
CC	GO:0005694	chromosome	14/585	96/4112	0.505035	1	HF32994/HF19344/HF11083/HF35864/HF23259/HF27204/HF33039/HF27087/HF16914/novel.3593/HF42048/HF15824/HF32864/HF34830	-/-/-/-/-/-/-/-/-/-/-/-/-/-	14	11	HF19344/HF35864/HF23259/HF33039/HF27087/HF16914/novel.3593/HF42048/HF15824/HF32864/HF34830	3	HF32994/HF11083/HF27204
CC	GO:0000785	chromatin	4/585	26/4112	0.517243	1	HF19344/HF35864/HF42048/HF32864	-/-/-/-	4	4	HF19344/HF35864/HF42048/HF32864	0
CC	GO:0070469	respiratory chain	2/585	12/4112	0.526089	1	HF31536/HF07315	-/-	2	1	HF31536	1	HF07315
CC	GO:0009654	photosystem II oxygen evolving complex	5/585	34/4112	0.54272	1	HF29954/HF16885/HF10990/HF42420/HF06997	-/-/-/-/-	5	1	HF16885	4	HF29954/HF10990/HF42420/HF06997
CC	GO:0044815	DNA packaging complex	4/585	28/4112	0.578805	1	HF19344/HF35864/HF42048/HF32864	-/-/-/-	4	4	HF19344/HF35864/HF42048/HF32864	0
CC	GO:0000139	Golgi membrane	2/585	14/4112	0.61286	1	HF41837/HF10626	-/-	2	2	HF41837/HF10626	0
CC	GO:0042651	thylakoid membrane	5/585	37/4112	0.621618	1	HF29954/HF16885/HF10990/HF42420/HF06997	-/-/-/-/-	5	1	HF16885	4	HF29954/HF10990/HF42420/HF06997
CC	GO:0019898	extrinsic component of membrane	5/585	38/4112	0.646041	1	HF16885/HF42420/HF06997/HF21935/HF13999	-/-/-/-/-	5	2	HF16885/HF13999	3	HF42420/HF06997/HF21935
CC	GO:0044459	plasma membrane part	5/585	38/4112	0.646041	1	HF29069/novel.2375/HF21935/HF11479/HF13999	-/-/-/-/-	5	3	novel.2375/HF11479/HF13999	2	HF29069/HF21935
CC	GO:0044454	nuclear chromosome part	2/585	15/4112	0.651467	1	HF23259/HF15824	-/-	2	2	HF23259/HF15824	0
CC	GO:0005743	mitochondrial inner membrane	4/585	31/4112	0.662113	1	HF41468/HF31536/HF07315/HF21230	-/-/-/-	4	1	HF31536	3	HF41468/HF07315/HF21230
CC	GO:0031974	membrane-enclosed lumen	14/585	106/4112	0.662296	1	HF32994/HF24770/HF42711/HF23259/novel.694/HF39239/HF23815/HF43745/HF03283/HF18961/HF13370/HF20528/HF16914/HF15824	-/-/-/-/-/-/-/-/-/-/-/-/-/-	14	8	HF42711/HF23259/HF39239/HF23815/HF43745/HF13370/HF16914/HF15824	6	HF32994/HF24770/novel.694/HF03283/HF18961/HF20528
CC	GO:0043233	organelle lumen	14/585	106/4112	0.662296	1	HF32994/HF24770/HF42711/HF23259/novel.694/HF39239/HF23815/HF43745/HF03283/HF18961/HF13370/HF20528/HF16914/HF15824	-/-/-/-/-/-/-/-/-/-/-/-/-/-	14	8	HF42711/HF23259/HF39239/HF23815/HF43745/HF13370/HF16914/HF15824	6	HF32994/HF24770/novel.694/HF03283/HF18961/HF20528
CC	GO:0070013	intracellular organelle lumen	14/585	106/4112	0.662296	1	HF32994/HF24770/HF42711/HF23259/novel.694/HF39239/HF23815/HF43745/HF03283/HF18961/HF13370/HF20528/HF16914/HF15824	-/-/-/-/-/-/-/-/-/-/-/-/-/-	14	8	HF42711/HF23259/HF39239/HF23815/HF43745/HF13370/HF16914/HF15824	6	HF32994/HF24770/novel.694/HF03283/HF18961/HF20528
CC	GO:0099023	tethering complex	5/585	39/4112	0.669451	1	HF27996/HF04719/HF34165/HF40037/novel.3606	-/-/-/-/-	5	1	novel.3606	4	HF27996/HF04719/HF34165/HF40037
CC	GO:0098791	Golgi subcompartment	2/585	16/4112	0.686945	1	HF41837/HF10626	-/-	2	2	HF41837/HF10626	0
CC	GO:0019866	organelle inner membrane	4/585	32/4112	0.687255	1	HF41468/HF31536/HF07315/HF21230	-/-/-/-	4	1	HF31536	3	HF41468/HF07315/HF21230
CC	GO:1990204	oxidoreductase complex	5/585	40/4112	0.691822	1	HF29954/HF16885/HF10990/HF42420/HF06997	-/-/-/-/-	5	1	HF16885	4	HF29954/HF10990/HF42420/HF06997
CC	GO:0005886	plasma membrane	5/585	41/4112	0.713138	1	HF29069/novel.2375/HF21935/HF11479/HF13999	-/-/-/-/-	5	3	novel.2375/HF11479/HF13999	2	HF29069/HF21935
CC	GO:0044429	mitochondrial part	9/585	73/4112	0.73014	1	novel.694/HF41468/HF43745/HF03283/HF31536/HF13370/novel.2844/HF07315/HF21230	-/-/-/-/-/-/-/-/-	9	4	HF43745/HF31536/HF13370/novel.2844	5	novel.694/HF41468/HF03283/HF07315/HF21230
CC	GO:0009522	photosystem I	2/585	18/4112	0.748977	1	novel.2710/HF23131	-/-	2	2	novel.2710/HF23131	0
CC	GO:0032040	small-subunit processome	2/585	18/4112	0.748977	1	HF32225/novel.2331	-/-	2	0		2	HF32225/novel.2331
CC	GO:0098797	plasma membrane protein complex	4/585	35/4112	0.754599	1	HF29069/novel.2375/HF21935/HF13999	-/-/-/-	4	2	novel.2375/HF13999	2	HF29069/HF21935
CC	GO:0044428	nuclear part	18/585	145/4112	0.772061	1	HF32994/novel.1238/HF24770/HF42711/HF31607/HF23259/HF41369/HF39239/HF23815/HF18961/HF30340/HF15708/HF20528/HF16914/HF37582/HF12808/HF15824/novel.2176	-/-/-/-/-/-/-/-/-/-/-/-/-/-/-/-/-/-	18	10	novel.1238/HF42711/HF23259/HF41369/HF39239/HF23815/HF15708/HF16914/HF37582/HF15824	8	HF32994/HF24770/HF31607/HF18961/HF30340/HF20528/HF12808/novel.2176
CC	GO:0044455	mitochondrial membrane part	3/585	28/4112	0.782611	1	HF31536/novel.2844/HF21230	-/-/-	3	2	HF31536/novel.2844	1	HF21230
CC	GO:0005852	eukaryotic translation initiation factor 3 complex	1/585	10/4112	0.784854	1	HF10726	-	1	1	HF10726	0
CC	GO:0005905	clathrin-coated pit	1/585	10/4112	0.784854	1	novel.2375	-	1	1	novel.2375	0
CC	GO:0012510	trans-Golgi network transport vesicle membrane	1/585	10/4112	0.784854	1	novel.2375	-	1	1	novel.2375	0
CC	GO:0030125	clathrin vesicle coat	1/585	10/4112	0.784854	1	novel.2375	-	1	1	novel.2375	0
CC	GO:0030130	clathrin coat of trans-Golgi network vesicle	1/585	10/4112	0.784854	1	novel.2375	-	1	1	novel.2375	0
CC	GO:0030132	clathrin coat of coated pit	1/585	10/4112	0.784854	1	novel.2375	-	1	1	novel.2375	0
CC	GO:0030136	clathrin-coated vesicle	1/585	10/4112	0.784854	1	novel.2375	-	1	1	novel.2375	0
CC	GO:0030140	trans-Golgi network transport vesicle	1/585	10/4112	0.784854	1	novel.2375	-	1	1	novel.2375	0
CC	GO:0030665	clathrin-coated vesicle membrane	1/585	10/4112	0.784854	1	novel.2375	-	1	1	novel.2375	0
CC	GO:0033178	proton-transporting two-sector ATPase complex, catalytic domain	3/585	29/4112	0.802776	1	HF37328/HF15622/HF37943	-/-/-	3	3	HF37328/HF15622/HF37943	0
CC	GO:0005740	mitochondrial envelope	7/585	63/4112	0.812608	1	novel.694/HF41468/HF03283/HF31536/novel.2844/HF07315/HF21230	-/-/-/-/-/-/-	7	2	HF31536/novel.2844	5	novel.694/HF41468/HF03283/HF07315/HF21230
CC	GO:0005753	mitochondrial proton-transporting ATP synthase complex	1/585	11/4112	0.815536	1	HF21230	-	1	0		1	HF21230
CC	GO:0005787	signal peptidase complex	1/585	11/4112	0.815536	1	HF44346	-	1	1	HF44346	0
CC	GO:0005829	cytosol	1/585	11/4112	0.815536	1	HF34430	-	1	1	HF34430	0
CC	GO:0044445	cytosolic part	1/585	11/4112	0.815536	1	HF34430	-	1	1	HF34430	0
CC	GO:0098798	mitochondrial protein complex	3/585	30/4112	0.821348	1	HF31536/novel.2844/HF21230	-/-/-	3	2	HF31536/novel.2844	1	HF21230
CC	GO:0016459	myosin complex	2/585	21/4112	0.822087	1	HF41914/HF35014	-/-	2	1	HF35014	1	HF41914
CC	GO:0016592	mediator complex	2/585	21/4112	0.822087	1	HF23815/HF20528	-/-	2	1	HF23815	1	HF20528
CC	GO:0098800	inner mitochondrial membrane protein complex	2/585	21/4112	0.822087	1	HF31536/HF21230	-/-	2	1	HF31536	1	HF21230
CC	GO:0030684	preribosome	2/585	22/4112	0.841844	1	HF32225/novel.2331	-/-	2	0		2	HF32225/novel.2331
CC	GO:0045259	proton-transporting ATP synthase complex	2/585	22/4112	0.841844	1	HF37328/HF21230	-/-	2	1	HF37328	1	HF21230
CC	GO:0030126	COPI vesicle coat	1/585	12/4112	0.84185	1	HF23181	-	1	1	HF23181	0
CC	GO:0030137	COPI-coated vesicle	1/585	12/4112	0.84185	1	HF23181	-	1	1	HF23181	0
CC	GO:0030663	COPI-coated vesicle membrane	1/585	12/4112	0.84185	1	HF23181	-	1	1	HF23181	0
CC	GO:0044427	chromosomal part	7/585	66/4112	0.848828	1	HF19344/HF35864/HF23259/HF27087/HF42048/HF15824/HF32864	-/-/-/-/-/-/-	7	7	HF19344/HF35864/HF23259/HF27087/HF42048/HF15824/HF32864	0
CC	GO:0005794	Golgi apparatus	5/585	51/4112	0.870424	1	HF38047/novel.2375/HF23181/HF41837/HF10626	-/-/-/-/-	5	4	novel.2375/HF23181/HF41837/HF10626	1	HF38047
CC	GO:0044431	Golgi apparatus part	5/585	51/4112	0.870424	1	HF38047/novel.2375/HF23181/HF41837/HF10626	-/-/-/-/-	5	4	novel.2375/HF23181/HF41837/HF10626	1	HF38047
CC	GO:0031981	nuclear lumen	10/585	93/4112	0.871216	1	HF32994/HF24770/HF42711/HF23259/HF39239/HF23815/HF18961/HF20528/HF16914/HF15824	-/-/-/-/-/-/-/-/-/-	10	6	HF42711/HF23259/HF39239/HF23815/HF16914/HF15824	4	HF32994/HF24770/HF18961/HF20528
CC	GO:0045261	proton-transporting ATP synthase complex, catalytic core F(1)	1/585	14/4112	0.883766	1	HF37328	-	1	1	HF37328	0
CC	GO:0000148	1,3-beta-D-glucan synthase complex	1/585	16/4112	0.914586	1	HF29069	-	1	0		1	HF29069
CC	GO:0000159	protein phosphatase type 2A complex	1/585	16/4112	0.914586	1	HF36069	-	1	0		1	HF36069
CC	GO:0008287	protein serine/threonine phosphatase complex	1/585	16/4112	0.914586	1	HF36069	-	1	0		1	HF36069
CC	GO:1903293	phosphatase complex	1/585	16/4112	0.914586	1	HF36069	-	1	0		1	HF36069
CC	GO:0031966	mitochondrial membrane	5/585	56/4112	0.916779	1	HF41468/HF31536/novel.2844/HF07315/HF21230	-/-/-/-/-	5	2	HF31536/novel.2844	3	HF41468/HF07315/HF21230
CC	GO:0005739	mitochondrion	16/585	150/4112	0.922244	1	HF40206/HF41112/novel.694/HF41468/HF16603/HF43745/HF03283/HF31536/HF28727/HF13370/HF00742/novel.2844/HF16612/HF10654/HF07315/HF21230	-/-/-/-/-/-/-/-/-/-/-/-/-/-/-/-	16	8	HF40206/HF16603/HF43745/HF31536/HF28727/HF13370/novel.2844/HF16612	8	HF41112/novel.694/HF41468/HF03283/HF00742/HF10654/HF07315/HF21230
CC	GO:0030133	transport vesicle	2/585	28/4112	0.923869	1	HF31333/novel.2375	-/-	2	2	HF31333/novel.2375	0
CC	GO:0030658	transport vesicle membrane	2/585	28/4112	0.923869	1	HF31333/novel.2375	-/-	2	2	HF31333/novel.2375	0
CC	GO:1990234	transferase complex	7/585	76/4112	0.930782	1	HF24770/HF29069/HF41369/HF30157/HF30340/HF15708/HF12808	-/-/-/-/-/-/-	7	3	HF41369/HF30157/HF15708	4	HF24770/HF29069/HF30340/HF12808
CC	GO:0031967	organelle envelope	7/585	77/4112	0.936303	1	novel.694/HF41468/HF03283/HF31536/novel.2844/HF07315/HF21230	-/-/-/-/-/-/-	7	2	HF31536/novel.2844	5	novel.694/HF41468/HF03283/HF07315/HF21230
CC	GO:0031975	envelope	7/585	77/4112	0.936303	1	novel.694/HF41468/HF03283/HF31536/novel.2844/HF07315/HF21230	-/-/-/-/-/-/-	7	2	HF31536/novel.2844	5	novel.694/HF41468/HF03283/HF07315/HF21230
CC	GO:0012507	ER to Golgi transport vesicle membrane	1/585	18/4112	0.937244	1	HF31333	-	1	1	HF31333	0
CC	GO:0030118	clathrin coat	1/585	18/4112	0.937244	1	novel.2375	-	1	1	novel.2375	0
CC	GO:0030127	COPII vesicle coat	1/585	18/4112	0.937244	1	HF31333	-	1	1	HF31333	0
CC	GO:0030134	COPII-coated ER to Golgi transport vesicle	1/585	18/4112	0.937244	1	HF31333	-	1	1	HF31333	0
CC	GO:0005798	Golgi-associated vesicle	3/585	40/4112	0.938097	1	HF31333/novel.2375/HF23181	-/-/-	3	3	HF31333/novel.2375/HF23181	0
CC	GO:0012506	vesicle membrane	3/585	40/4112	0.938097	1	HF31333/novel.2375/HF23181	-/-/-	3	3	HF31333/novel.2375/HF23181	0
CC	GO:0030120	vesicle coat	3/585	40/4112	0.938097	1	HF31333/novel.2375/HF23181	-/-/-	3	3	HF31333/novel.2375/HF23181	0
CC	GO:0030135	coated vesicle	3/585	40/4112	0.938097	1	HF31333/novel.2375/HF23181	-/-/-	3	3	HF31333/novel.2375/HF23181	0
CC	GO:0030659	cytoplasmic vesicle membrane	3/585	40/4112	0.938097	1	HF31333/novel.2375/HF23181	-/-/-	3	3	HF31333/novel.2375/HF23181	0
CC	GO:0030660	Golgi-associated vesicle membrane	3/585	40/4112	0.938097	1	HF31333/novel.2375/HF23181	-/-/-	3	3	HF31333/novel.2375/HF23181	0
CC	GO:0030662	coated vesicle membrane	3/585	40/4112	0.938097	1	HF31333/novel.2375/HF23181	-/-/-	3	3	HF31333/novel.2375/HF23181	0
CC	GO:0031410	cytoplasmic vesicle	3/585	40/4112	0.938097	1	HF31333/novel.2375/HF23181	-/-/-	3	3	HF31333/novel.2375/HF23181	0
CC	GO:0031982	vesicle	3/585	40/4112	0.938097	1	HF31333/novel.2375/HF23181	-/-/-	3	3	HF31333/novel.2375/HF23181	0
CC	GO:0044433	cytoplasmic vesicle part	3/585	40/4112	0.938097	1	HF31333/novel.2375/HF23181	-/-/-	3	3	HF31333/novel.2375/HF23181	0
CC	GO:0097708	intracellular vesicle	3/585	40/4112	0.938097	1	HF31333/novel.2375/HF23181	-/-/-	3	3	HF31333/novel.2375/HF23181	0
CC	GO:0016591	DNA-directed RNA polymerase II, holoenzyme	1/585	19/4112	0.946212	1	HF24770	-	1	0		1	HF24770
CC	GO:0098687	chromosomal region	1/585	19/4112	0.946212	1	HF15824	-	1	1	HF15824	0
CC	GO:0044422	organelle part	56/585	471/4112	0.94908	1	HF32994/HF38047/HF31333/novel.1238/HF19344/HF35864/HF24770/HF42711/HF39297/HF31607/HF23259/HF17199/HF41369/novel.694/HF41914/HF41468/HF39239/HF23815/HF17893/novel.2375/HF43745/HF03283/HF31536/HF18961/HF23181/HF19412/novel.583/HF00242/HF30340/novel.3649/HF44346/HF13370/HF15708/HF27087/novel.2844/HF41837/HF20528/HF16914/HF14488/HF33434/HF42048/HF00243/HF19430/HF37582/HF12808/HF15824/HF32864/HF33440…	-/-/-/-/-/-/-/-/-/-/-/-/-/-/-/-/-/-/-/-/-/-/-/-/-/-/-/-/-/-/-/-/-/-/-/-/-/-/-/-/-/-/-/-/-/-/-/-/-/-/-/-/-/-/-/-	56	39	HF31333/novel.1238/HF19344/HF35864/HF42711/HF39297/HF23259/HF17199/HF41369/HF39239/HF23815/HF17893/novel.2375/HF43745/HF31536/HF23181/HF19412/novel.583/HF00242/novel.3649/HF44346/HF13370/HF15708/HF27087/novel.2844/HF41837/HF16914/HF33434/HF42048/HF00243/HF19430/HF37582/HF15824/HF32864/HF33440/HF14581/HF35014/HF39278/HF10626	17	HF32994/HF38047/HF24770/HF31607/novel.694/HF41914/HF41468/HF03283/HF18961/HF30340/HF20528/HF14488/HF12808/HF07315/HF18595/novel.2176/HF21230
CC	GO:0044446	intracellular organelle part	56/585	471/4112	0.94908	1	HF32994/HF38047/HF31333/novel.1238/HF19344/HF35864/HF24770/HF42711/HF39297/HF31607/HF23259/HF17199/HF41369/novel.694/HF41914/HF41468/HF39239/HF23815/HF17893/novel.2375/HF43745/HF03283/HF31536/HF18961/HF23181/HF19412/novel.583/HF00242/HF30340/novel.3649/HF44346/HF13370/HF15708/HF27087/novel.2844/HF41837/HF20528/HF16914/HF14488/HF33434/HF42048/HF00243/HF19430/HF37582/HF12808/HF15824/HF32864/HF33440…	-/-/-/-/-/-/-/-/-/-/-/-/-/-/-/-/-/-/-/-/-/-/-/-/-/-/-/-/-/-/-/-/-/-/-/-/-/-/-/-/-/-/-/-/-/-/-/-/-/-/-/-/-/-/-/-	56	39	HF31333/novel.1238/HF19344/HF35864/HF42711/HF39297/HF23259/HF17199/HF41369/HF39239/HF23815/HF17893/novel.2375/HF43745/HF31536/HF23181/HF19412/novel.583/HF00242/novel.3649/HF44346/HF13370/HF15708/HF27087/novel.2844/HF41837/HF16914/HF33434/HF42048/HF00243/HF19430/HF37582/HF15824/HF32864/HF33440/HF14581/HF35014/HF39278/HF10626	17	HF32994/HF38047/HF24770/HF31607/novel.694/HF41914/HF41468/HF03283/HF18961/HF30340/HF20528/HF14488/HF12808/HF07315/HF18595/novel.2176/HF21230
CC	GO:0016469	proton-transporting two-sector ATPase complex	4/585	54/4112	0.960018	1	HF37328/HF15622/HF37943/HF21230	-/-/-/-	4	3	HF37328/HF15622/HF37943	1	HF21230
CC	GO:0005667	transcription factor complex	1/585	22/4112	0.96614	1	HF05858	-	1	1	HF05858	0
CC	GO:0005654	nucleoplasm	4/585	57/4112	0.970954	1	HF24770/HF23815/HF18961/HF20528	-/-/-/-	4	1	HF23815	3	HF24770/HF18961/HF20528
CC	GO:0044451	nucleoplasm part	4/585	57/4112	0.970954	1	HF24770/HF23815/HF18961/HF20528	-/-/-/-	4	1	HF23815	3	HF24770/HF18961/HF20528
CC	GO:0031984	organelle subcompartment	5/585	67/4112	0.971104	1	HF19412/HF44346/HF41837/HF14488/HF10626	-/-/-/-/-	5	4	HF19412/HF44346/HF41837/HF10626	1	HF14488
CC	GO:0000428	DNA-directed RNA polymerase complex	1/585	24/4112	0.975134	1	HF24770	-	1	0		1	HF24770
CC	GO:0005741	mitochondrial outer membrane	1/585	24/4112	0.975134	1	novel.2844	-	1	1	novel.2844	0
CC	GO:0030880	RNA polymerase complex	1/585	24/4112	0.975134	1	HF24770	-	1	0		1	HF24770
CC	GO:0031968	organelle outer membrane	1/585	24/4112	0.975134	1	novel.2844	-	1	1	novel.2844	0
CC	GO:0055029	nuclear DNA-directed RNA polymerase complex	1/585	24/4112	0.975134	1	HF24770	-	1	0		1	HF24770
CC	GO:0098796	membrane protein complex	25/585	246/4112	0.979532	1	HF31333/HF29954/HF21418/HF29069/novel.2375/HF31536/HF16885/novel.2754/HF23181/HF10990/HF19412/HF42420/HF06997/HF37328/HF44346/novel.2710/novel.2844/HF21935/HF15622/HF30777/HF23131/HF37943/HF13999/HF39128/HF21230	-/-/-/-/-/-/-/-/-/-/-/-/-/-/-/-/-/-/-/-/-/-/-/-/-	25	16	HF31333/novel.2375/HF31536/HF16885/novel.2754/HF23181/HF19412/HF37328/HF44346/novel.2710/novel.2844/HF15622/HF30777/HF23131/HF37943/HF13999	9	HF29954/HF21418/HF29069/HF10990/HF42420/HF06997/HF21935/HF39128/HF21230
CC	GO:0033177	proton-transporting two-sector ATPase complex, proton-transporting domain	1/585	26/4112	0.981742	1	HF21230	-	1	0		1	HF21230
CC	GO:0005789	endoplasmic reticulum membrane	3/585	51/4112	0.982725	1	HF19412/HF44346/HF14488	-/-/-	3	2	HF19412/HF44346	1	HF14488
CC	GO:0042175	nuclear outer membrane-endoplasmic reticulum membrane network	3/585	51/4112	0.982725	1	HF19412/HF44346/HF14488	-/-/-	3	2	HF19412/HF44346	1	HF14488
CC	GO:0044432	endoplasmic reticulum part	3/585	51/4112	0.982725	1	HF19412/HF44346/HF14488	-/-/-	3	2	HF19412/HF44346	1	HF14488
CC	GO:0098827	endoplasmic reticulum subcompartment	3/585	51/4112	0.982725	1	HF19412/HF44346/HF14488	-/-/-	3	2	HF19412/HF44346	1	HF14488
CC	GO:0061695	transferase complex, transferring phosphorus-containing groups	1/585	27/4112	0.984356	1	HF24770	-	1	0		1	HF24770
CC	GO:0031090	organelle membrane	10/585	125/4112	0.989103	1	HF31333/HF41468/novel.2375/HF31536/HF23181/novel.2844/HF41837/HF07315/HF21230/HF10626	-/-/-/-/-/-/-/-/-/-	10	7	HF31333/novel.2375/HF31536/HF23181/novel.2844/HF41837/HF10626	3	HF41468/HF07315/HF21230
CC	GO:0019867	outer membrane	1/585	31/4112	0.991572	1	novel.2844	-	1	1	novel.2844	0
CC	GO:0098588	bounding membrane of organelle	6/585	92/4112	0.993798	1	HF31333/novel.2375/HF23181/novel.2844/HF41837/HF10626	-/-/-/-/-/-	6	6	HF31333/novel.2375/HF23181/novel.2844/HF41837/HF10626	0
CC	GO:0030117	membrane coat	3/585	60/4112	0.994274	1	HF31333/novel.2375/HF23181	-/-/-	3	3	HF31333/novel.2375/HF23181	0
CC	GO:0048475	coated membrane	3/585	60/4112	0.994274	1	HF31333/novel.2375/HF23181	-/-/-	3	3	HF31333/novel.2375/HF23181	0
CC	GO:0005783	endoplasmic reticulum	5/585	83/4112	0.994707	1	HF15792/HF08797/HF19412/HF44346/HF14488	-/-/-/-/-	5	4	HF15792/HF08797/HF19412/HF44346	1	HF14488
CC	GO:0098805	whole membrane	4/585	74/4112	0.995769	1	HF31333/novel.2375/HF23181/novel.2844	-/-/-/-	4	4	HF31333/novel.2375/HF23181/novel.2844	0
CC	GO:1902494	catalytic complex	19/585	222/4112	0.996885	1	HF29954/HF24770/HF29069/HF41369/HF16885/HF30157/HF10990/HF19412/HF42420/HF30340/HF06997/HF44346/HF15708/HF06807/HF21935/HF34430/HF12808/HF13999/HF36069	-/-/-/-/-/-/-/-/-/-/-/-/-/-/-/-/-/-/-	19	9	HF41369/HF16885/HF30157/HF19412/HF44346/HF15708/HF06807/HF34430/HF13999	10	HF29954/HF24770/HF29069/HF10990/HF42420/HF30340/HF06997/HF21935/HF12808/HF36069
CC	GO:0012505	endomembrane system	12/585	171/4112	0.999064	1	HF38047/HF31333/HF15792/novel.2375/HF08797/novel.2754/HF23181/HF19412/HF44346/HF41837/HF14488/HF10626	-/-/-/-/-/-/-/-/-/-/-/-	12	10	HF31333/HF15792/novel.2375/HF08797/novel.2754/HF23181/HF19412/HF44346/HF41837/HF10626	2	HF38047/HF14488
CC	GO:1905368	peptidase complex	1/585	55/4112	0.999797	1	HF44346	-	1	1	HF44346	0
CC	GO:0005840	ribosome	27/585	411/4112	1	1	novel.189/HF03109/HF36717/HF22066/HF06929/novel.3632/HF11728/HF02357/HF06975/HF17763/HF17765/HF26245/HF34398/HF19187/HF03389/novel.374/HF35917/HF43199/HF19163/HF02543/HF18858/HF17242/HF26336/novel.334/HF34001/HF16992/HF44547	-/-/-/-/-/-/-/-/-/-/-/-/-/-/-/-/-/-/-/-/-/-/-/-/-/-/-	27	15	HF36717/HF22066/HF06929/HF11728/HF17765/HF34398/HF03389/novel.374/HF35917/HF19163/HF02543/HF18858/HF17242/HF34001/HF44547	12	novel.189/HF03109/novel.3632/HF02357/HF06975/HF17763/HF26245/HF19187/HF43199/HF26336/novel.334/HF16992
CC	GO:1990904	ribonucleoprotein complex	32/585	471/4112	1	1	novel.1238/novel.189/HF03109/HF36717/HF22066/HF32225/HF06929/novel.3632/HF11728/HF02357/HF06975/HF17763/HF17765/HF26245/HF30012/novel.2331/HF34398/HF19187/HF03389/novel.374/HF35917/HF43199/HF19163/HF02543/HF18858/HF17242/HF26336/novel.334/HF34001/novel.2176/HF16992/HF44547	-/-/-/-/-/-/-/-/-/-/-/-/-/-/-/-/-/-/-/-/-/-/-/-/-/-/-/-/-/-/-/-	32	16	novel.1238/HF36717/HF22066/HF06929/HF11728/HF17765/HF34398/HF03389/novel.374/HF35917/HF19163/HF02543/HF18858/HF17242/HF34001/HF44547	16	novel.189/HF03109/HF32225/novel.3632/HF02357/HF06975/HF17763/HF26245/HF30012/novel.2331/HF19187/HF43199/HF26336/novel.334/novel.2176/HF16992
MF	GO:0020037	heme binding	133/2710	423/16678	3.37973e-15	8.09945e-13	HF34622/HF17505/HF23544/HF03307/HF24647/HF31610/HF24768/HF25533/HF01632/HF34546/HF40774/HF39732/HF40058/HF24635/HF21653/HF27337/HF31168/HF43556/HF10076/HF13397/HF39730/novel.2792/novel.1315/HF07625/HF27180/HF12664/HF06391/HF13281/novel.2251/novel.2976/novel.1274/HF21572/HF25839/novel.3075/HF01314/HF08054/HF27612/HF17045/HF29975/HF42680/HF29363/novel.2790/novel.3097/HF24662/HF30422/HF03751/HF36473…	-/-/-/-/-/-/-/-/-/-/-/-/-/-/-/-/-/-/-/-/-/-/-/-/-/-/-/-/-/-/-/-/-/-/-/-/-/-/-/-/-/-/-/-/-/-/-/-/-/-/-/-/-/-/-/-/-/-/-/-/-/-/-/-/-/-/-/-/-/-/-/-/-/-/-/-/-/-/-/-/-/-/-/-/-/-/-/-/-/-/-/-/-/-/-/-/-/-/-/-/-/-/-/-/-/-/-/-/-/-/-/-/-/-/-/-/-/-/-/-/-/-/-/-/-/-/-/-/-/-/-/-/-	133	82	HF34622/HF23544/HF03307/HF25533/HF40774/HF39732/HF40058/HF24635/HF27337/HF39730/novel.1315/HF12664/HF06391/novel.1274/HF25839/HF01314/HF08054/HF17045/HF42680/HF29363/novel.2790/novel.3097/HF30422/HF03751/HF39985/HF22510/novel.1424/HF09443/HF43392/HF39986/HF41388/HF15337/HF18566/HF25393/HF23973/HF21144/HF35263/HF42317/HF35262/HF06546/HF27178/HF09444/HF25735/HF42312/HF36024/HF23619/HF22050/HF20805/…	51	HF17505/HF24647/HF31610/HF24768/HF01632/HF34546/HF21653/HF31168/HF43556/HF10076/HF13397/novel.2792/HF07625/HF27180/HF13281/novel.2251/novel.2976/HF21572/novel.3075/HF27612/HF29975/HF24662/HF36473/HF23827/HF42779/HF40269/HF41390/HF13403/HF19029/HF32543/HF04206/HF24645/HF04768/HF13025/HF39736/HF11009/HF11351/HF34455/HF26468/novel.3067/HF42780/novel.3491/HF16468/HF31447/novel.2674/HF21180/HF14520/HF…
MF	GO:0046906	tetrapyrrole binding	133/2710	424/16678	4.15357e-15	8.09945e-13	HF34622/HF17505/HF23544/HF03307/HF24647/HF31610/HF24768/HF25533/HF01632/HF34546/HF40774/HF39732/HF40058/HF24635/HF21653/HF27337/HF31168/HF43556/HF10076/HF13397/HF39730/novel.2792/novel.1315/HF07625/HF27180/HF12664/HF06391/HF13281/novel.2251/novel.2976/novel.1274/HF21572/HF25839/novel.3075/HF01314/HF08054/HF27612/HF17045/HF29975/HF42680/HF29363/novel.2790/novel.3097/HF24662/HF30422/HF03751/HF36473…	-/-/-/-/-/-/-/-/-/-/-/-/-/-/-/-/-/-/-/-/-/-/-/-/-/-/-/-/-/-/-/-/-/-/-/-/-/-/-/-/-/-/-/-/-/-/-/-/-/-/-/-/-/-/-/-/-/-/-/-/-/-/-/-/-/-/-/-/-/-/-/-/-/-/-/-/-/-/-/-/-/-/-/-/-/-/-/-/-/-/-/-/-/-/-/-/-/-/-/-/-/-/-/-/-/-/-/-/-/-/-/-/-/-/-/-/-/-/-/-/-/-/-/-/-/-/-/-/-/-/-/-/-	133	82	HF34622/HF23544/HF03307/HF25533/HF40774/HF39732/HF40058/HF24635/HF27337/HF39730/novel.1315/HF12664/HF06391/novel.1274/HF25839/HF01314/HF08054/HF17045/HF42680/HF29363/novel.2790/novel.3097/HF30422/HF03751/HF39985/HF22510/novel.1424/HF09443/HF43392/HF39986/HF41388/HF15337/HF18566/HF25393/HF23973/HF21144/HF35263/HF42317/HF35262/HF06546/HF27178/HF09444/HF25735/HF42312/HF36024/HF23619/HF22050/HF20805/…	51	HF17505/HF24647/HF31610/HF24768/HF01632/HF34546/HF21653/HF31168/HF43556/HF10076/HF13397/novel.2792/HF07625/HF27180/HF13281/novel.2251/novel.2976/HF21572/novel.3075/HF27612/HF29975/HF24662/HF36473/HF23827/HF42779/HF40269/HF41390/HF13403/HF19029/HF32543/HF04206/HF24645/HF04768/HF13025/HF39736/HF11009/HF11351/HF34455/HF26468/novel.3067/HF42780/novel.3491/HF16468/HF31447/novel.2674/HF21180/HF14520/HF…
MF	GO:0016705	oxidoreductase activity, acting on paired donors, with incorporation or reduction of molecular oxygen	112/2710	349/16678	1.15978e-13	1.50771e-11	HF34622/HF17505/HF23544/HF03307/HF24647/HF31610/HF24768/HF25533/HF10556/novel.2917/HF34546/HF24635/HF21653/HF31168/HF43556/HF13397/novel.2792/HF30423/novel.1315/HF07625/HF10346/HF27180/HF13281/HF24802/novel.2251/novel.2976/HF10349/novel.1274/HF21572/HF25839/novel.3075/HF01314/HF08054/HF27612/HF17045/HF29975/HF23957/HF42680/HF29363/novel.2790/novel.3097/HF24662/HF36473/HF23827/HF39985/HF02856/HF42…	-/-/-/-/-/-/-/-/-/-/-/-/-/-/-/-/-/-/-/-/-/-/-/-/-/-/-/-/-/-/-/-/-/-/-/-/-/-/-/-/-/-/-/-/-/-/-/-/-/-/-/-/-/-/-/-/-/-/-/-/-/-/-/-/-/-/-/-/-/-/-/-/-/-/-/-/-/-/-/-/-/-/-/-/-/-/-/-/-/-/-/-/-/-/-/-/-/-/-/-/-/-/-/-/-/-/-/-/-/-/-/-	112	58	HF34622/HF23544/HF03307/HF25533/HF24635/novel.1315/HF24802/novel.1274/HF25839/HF01314/HF08054/HF17045/HF42680/HF29363/novel.2790/novel.3097/HF39985/novel.1424/HF09443/HF43392/HF39986/HF41388/HF15337/HF25393/HF23973/HF21144/HF35263/HF42317/HF35262/HF06546/HF27178/HF09444/HF42312/HF05901/HF20805/HF30475/HF23672/HF28789/HF35679/HF05686/HF06545/novel.1398/HF29781/HF42677/HF09057/novel.3490/HF13406/HF…	54	HF17505/HF24647/HF31610/HF24768/HF10556/novel.2917/HF34546/HF21653/HF31168/HF43556/HF13397/novel.2792/HF30423/HF07625/HF10346/HF27180/HF13281/novel.2251/novel.2976/HF10349/HF21572/novel.3075/HF27612/HF29975/HF23957/HF24662/HF36473/HF23827/HF02856/HF42779/HF25408/HF40269/HF41390/HF13403/HF19029/HF32543/HF04206/HF12889/HF24645/HF40113/HF13025/HF11009/HF24800/HF34455/novel.3067/HF42780/novel.3491/HF…
MF	GO:0005506	iron ion binding	107/2710	344/16678	3.73737e-12	3.64394e-10	HF34622/HF26931/HF17505/HF23511/HF23544/HF03307/HF24647/HF31610/HF24768/HF25533/novel.278/HF34546/HF24635/HF21653/HF31168/HF43556/HF13397/HF41306/novel.2792/novel.1315/HF07625/HF27180/HF02479/HF13281/novel.2251/novel.2976/novel.1274/HF21572/HF25839/novel.3075/HF01314/HF08054/HF27612/HF17045/HF29975/HF42680/HF29363/novel.2790/novel.3097/HF24662/HF04035/HF36473/HF23827/HF39985/HF42779/HF40269/HF413…	-/-/-/-/-/-/-/-/-/-/-/-/-/-/-/-/-/-/-/-/-/-/-/-/-/-/-/-/-/-/-/-/-/-/-/-/-/-/-/-/-/-/-/-/-/-/-/-/-/-/-/-/-/-/-/-/-/-/-/-/-/-/-/-/-/-/-/-/-/-/-/-/-/-/-/-/-/-/-/-/-/-/-/-/-/-/-/-/-/-/-/-/-/-/-/-/-/-/-/-/-/-/-/-/-/-/-	107	60	HF34622/HF23544/HF03307/HF25533/HF24635/novel.1315/HF02479/novel.1274/HF25839/HF01314/HF08054/HF17045/HF42680/HF29363/novel.2790/novel.3097/HF04035/HF39985/novel.1424/HF09443/HF43392/HF39986/HF41388/HF15337/HF25393/HF23973/HF21144/HF35263/HF42317/HF35262/HF06546/HF27178/HF09444/HF42312/HF20805/HF30475/HF23672/HF28789/HF35679/HF05686/HF06545/novel.1398/HF29781/HF42677/HF09057/novel.3490/HF13406/HF…	47	HF26931/HF17505/HF23511/HF24647/HF31610/HF24768/novel.278/HF34546/HF21653/HF31168/HF43556/HF13397/HF41306/novel.2792/HF07625/HF27180/HF13281/novel.2251/novel.2976/HF21572/novel.3075/HF27612/HF29975/HF24662/HF36473/HF23827/HF42779/HF40269/HF41390/HF13403/HF19029/HF32543/HF04206/HF24645/HF13025/HF11009/HF37818/HF34455/novel.3067/HF42780/novel.3491/HF16468/novel.2674/HF21180/HF14520/HF41697/HF39957
MF	GO:0043531	ADP binding	68/2710	194/16678	1.11168e-10	8.67109e-09	HF40000/novel.338/HF21202/novel.344/novel.350/novel.3094/HF31157/novel.1180/novel.203/HF39975/novel.1097/novel.349/HF01752/HF37161/HF31299/HF38915/HF43815/HF31304/novel.346/HF21209/novel.2128/novel.1104/HF34470/novel.3684/HF21525/novel.1911/novel.1691/novel.3653/novel.1103/novel.828/HF14485/HF40152/HF40018/novel.1530/HF36256/novel.2365/novel.475/novel.2198/HF27474/novel.624/novel.1548/HF21522/HF3…	-/-/-/-/-/-/-/-/-/-/-/-/-/-/-/-/-/-/-/-/-/-/-/-/-/-/-/-/-/-/-/-/-/-/-/-/-/-/-/-/-/-/-/-/-/-/-/-/-/-/-/-/-/-/-/-/-/-/-/-/-/-/-/-/-/-/-/-	68	44	HF40000/novel.338/HF21202/novel.344/novel.350/novel.3094/HF31157/novel.1180/novel.203/HF39975/novel.349/HF01752/HF37161/HF38915/HF43815/HF31304/novel.346/HF21209/novel.2128/novel.1104/HF34470/novel.3684/HF21525/novel.3653/novel.1103/novel.828/HF40018/novel.2365/HF27474/novel.624/novel.1548/HF21522/HF34398/HF43531/HF40015/HF40013/HF10888/HF36939/novel.3597/HF31940/HF21205/novel.471/novel.3124/HF16…	24	novel.1097/HF31299/novel.1911/novel.1691/HF14485/HF40152/novel.1530/HF36256/novel.475/novel.2198/HF17531/HF34397/novel.2248/HF43573/HF31292/HF37158/HF11198/HF31291/HF39923/HF11486/HF34411/HF40153/HF08987/HF21520
MF	GO:0004601	peroxidase activity	41/2710	142/16678	0.000107187	0.00696716	HF01632/HF08509/HF40774/HF39732/HF40058/HF27337/HF10076/HF39730/novel.732/HF19073/HF12664/HF06391/HF21303/HF30845/HF30422/HF03751/HF42906/HF18566/HF04768/HF25735/HF36024/HF23619/HF22050/HF10428/HF15570/HF35330/HF39736/HF05384/HF11351/HF02241/HF20770/HF26468/HF33686/HF24555/HF34660/HF31447/HF22867/HF33687/HF06378/HF22563/HF39781	-/-/-/-/-/-/-/-/-/-/-/-/-/-/-/-/-/-/-/-/-/-/-/-/-/-/-/-/-/-/-/-/-/-/-/-/-/-/-/-/-	41	28	HF08509/HF40774/HF39732/HF40058/HF27337/HF39730/HF12664/HF06391/HF30422/HF03751/HF42906/HF18566/HF25735/HF36024/HF23619/HF22050/HF10428/HF15570/HF35330/HF05384/HF02241/HF20770/HF33686/HF24555/HF34660/HF22867/HF06378/HF22563	13	HF01632/HF10076/novel.732/HF19073/HF21303/HF30845/HF04768/HF39736/HF11351/HF26468/HF31447/HF33687/HF39781
MF	GO:0016684	oxidoreductase activity, acting on peroxide as acceptor	41/2710	145/16678	0.000176926	0.00985729	HF01632/HF08509/HF40774/HF39732/HF40058/HF27337/HF10076/HF39730/novel.732/HF19073/HF12664/HF06391/HF21303/HF30845/HF30422/HF03751/HF42906/HF18566/HF04768/HF25735/HF36024/HF23619/HF22050/HF10428/HF15570/HF35330/HF39736/HF05384/HF11351/HF02241/HF20770/HF26468/HF33686/HF24555/HF34660/HF31447/HF22867/HF33687/HF06378/HF22563/HF39781	-/-/-/-/-/-/-/-/-/-/-/-/-/-/-/-/-/-/-/-/-/-/-/-/-/-/-/-/-/-/-/-/-/-/-/-/-/-/-/-/-	41	28	HF08509/HF40774/HF39732/HF40058/HF27337/HF39730/HF12664/HF06391/HF30422/HF03751/HF42906/HF18566/HF25735/HF36024/HF23619/HF22050/HF10428/HF15570/HF35330/HF05384/HF02241/HF20770/HF33686/HF24555/HF34660/HF22867/HF06378/HF22563	13	HF01632/HF10076/novel.732/HF19073/HF21303/HF30845/HF04768/HF39736/HF11351/HF26468/HF31447/HF33687/HF39781
MF	GO:0016209	antioxidant activity	43/2710	157/16678	0.000269807	0.0131531	HF01632/HF08509/HF40774/HF39732/HF40058/HF27337/HF10076/HF39730/novel.732/HF19073/HF12664/HF06391/HF21303/novel.3281/HF30845/HF30422/HF03751/HF42906/HF18566/HF04768/HF25735/HF36024/HF23619/HF22050/HF10428/HF15570/HF35330/HF39736/HF05384/HF11351/HF02241/HF20770/HF26468/HF33686/HF24555/HF34660/HF31447/HF22867/HF03587/HF33687/HF06378/HF22563/HF39781	-/-/-/-/-/-/-/-/-/-/-/-/-/-/-/-/-/-/-/-/-/-/-/-/-/-/-/-/-/-/-/-/-/-/-/-/-/-/-/-/-/-/-	43	29	HF08509/HF40774/HF39732/HF40058/HF27337/HF39730/HF12664/HF06391/novel.3281/HF30422/HF03751/HF42906/HF18566/HF25735/HF36024/HF23619/HF22050/HF10428/HF15570/HF35330/HF05384/HF02241/HF20770/HF33686/HF24555/HF34660/HF22867/HF06378/HF22563	14	HF01632/HF10076/novel.732/HF19073/HF21303/HF30845/HF04768/HF39736/HF11351/HF26468/HF31447/HF03587/HF33687/HF39781
MF	GO:0004553	hydrolase activity, hydrolyzing O-glycosyl compounds	105/2710	473/16678	0.000380817	0.0165021	HF37337/HF08921/HF00861/HF04141/novel.2179/HF06570/HF04034/HF22291/HF33666/HF41257/HF18420/HF22290/HF23472/HF09162/HF01223/HF29041/HF21655/HF23741/HF09951/HF17970/HF19497/HF17522/HF36717/HF02157/HF05935/HF25654/HF40136/HF41998/HF07358/HF30087/HF04121/HF19224/HF10638/HF14989/HF13132/HF06698/HF25482/HF16214/novel.627/HF23732/HF09168/HF41803/HF38061/HF18258/HF04116/HF33761/HF35411/HF03925/HF37545/no…	-/-/-/-/-/-/-/-/-/-/-/-/-/-/-/-/-/-/-/-/-/-/-/-/-/-/-/-/-/-/-/-/-/-/-/-/-/-/-/-/-/-/-/-/-/-/-/-/-/-/-/-/-/-/-/-/-/-/-/-/-/-/-/-/-/-/-/-/-/-/-/-/-/-/-/-/-/-/-/-/-/-/-/-/-/-/-/-/-/-/-/-/-/-/-/-/-/-/-/-/-/-/-/-/-	105	62	HF08921/HF00861/novel.2179/HF22291/HF33666/HF41257/HF22290/HF23472/HF09162/HF29041/HF21655/HF23741/HF09951/HF17970/HF36717/HF02157/HF05935/HF40136/HF41998/HF07358/HF30087/HF10638/HF13132/HF06698/HF25482/novel.627/HF23732/HF09168/HF41803/HF18258/HF33761/HF35411/novel.3192/HF34088/HF38744/HF36692/HF03399/HF06807/HF25203/HF43076/HF26519/HF08183/HF00285/HF43753/HF36955/HF21339/HF24596/novel.2945/HF41…	43	HF37337/HF04141/HF06570/HF04034/HF18420/HF01223/HF19497/HF17522/HF25654/HF04121/HF19224/HF14989/HF16214/HF38061/HF04116/HF03925/HF37545/HF12389/HF13587/HF13368/HF23927/HF42192/HF04150/HF17612/HF25920/HF31124/HF21999/HF43199/HF02052/HF17001/HF31571/HF06968/novel.575/HF25914/HF26814/HF23510/HF05147/HF40895/HF15613/HF36008/HF29336/HF35108/HF13772
MF	GO:0016798	hydrolase activity, acting on glycosyl bonds	108/2710	493/16678	0.000526842	0.0205468	HF37337/HF08921/HF00861/HF04141/novel.2179/HF06570/HF04034/HF22291/HF33666/HF41257/HF18420/HF22290/HF23472/HF09162/HF01223/HF29041/HF21655/HF23741/HF09951/HF17970/HF19497/HF17522/HF36717/HF08433/HF02157/HF05935/HF25654/HF40136/HF41998/HF07358/HF30087/HF04121/HF19224/HF10638/HF14989/HF13132/HF06698/HF25482/HF16214/novel.627/HF23732/HF09168/HF41803/HF38061/HF18258/HF04116/HF33761/HF35411/HF21626/HF…	-/-/-/-/-/-/-/-/-/-/-/-/-/-/-/-/-/-/-/-/-/-/-/-/-/-/-/-/-/-/-/-/-/-/-/-/-/-/-/-/-/-/-/-/-/-/-/-/-/-/-/-/-/-/-/-/-/-/-/-/-/-/-/-/-/-/-/-/-/-/-/-/-/-/-/-/-/-/-/-/-/-/-/-/-/-/-/-/-/-/-/-/-/-/-/-/-/-/-/-/-/-/-/-/-/-/-/-	108	63	HF08921/HF00861/novel.2179/HF22291/HF33666/HF41257/HF22290/HF23472/HF09162/HF29041/HF21655/HF23741/HF09951/HF17970/HF36717/HF02157/HF05935/HF40136/HF41998/HF07358/HF30087/HF10638/HF13132/HF06698/HF25482/novel.627/HF23732/HF09168/HF41803/HF18258/HF33761/HF35411/HF21626/novel.3192/HF34088/HF38744/HF36692/HF03399/HF06807/HF25203/HF43076/HF26519/HF08183/HF00285/HF43753/HF36955/HF21339/HF24596/novel.2…	45	HF37337/HF04141/HF06570/HF04034/HF18420/HF01223/HF19497/HF17522/HF08433/HF25654/HF04121/HF19224/HF14989/HF16214/HF38061/HF04116/HF03925/HF37545/HF12389/HF13587/HF13368/HF23927/HF42192/HF04150/HF17612/HF25920/HF31124/HF21999/HF08436/HF43199/HF02052/HF17001/HF31571/HF06968/novel.575/HF25914/HF26814/HF23510/HF05147/HF40895/HF15613/HF36008/HF29336/HF35108/HF13772
MF	GO:0016161	beta-amylase activity	15/2710	39/16678	0.000709342	0.0251494	HF37337/HF04141/HF01223/HF17970/HF19497/HF36717/HF30087/HF04121/HF13132/HF04116/HF04150/HF43199/HF36955/HF02052/novel.2945	-/-/-/-/-/-/-/-/-/-/-/-/-/-/-	15	6	HF17970/HF36717/HF30087/HF13132/HF36955/novel.2945	9	HF37337/HF04141/HF01223/HF19497/HF04121/HF04116/HF04150/HF43199/HF02052
MF	GO:0016682	oxidoreductase activity, acting on diphenols and related substances as donors, oxygen as acceptor	9/2710	18/16678	0.000929018	0.0301931	HF17954/HF12095/HF19550/HF17936/HF17677/HF16442/HF02094/HF12093/HF17952	-/-/-/-/-/-/-/-/-	9	3	HF17954/HF17936/HF12093	6	HF12095/HF19550/HF17677/HF16442/HF02094/HF17952
MF	GO:0008171	O-methyltransferase activity	17/2710	51/16678	0.00207265	0.0621795	HF15239/novel.184/HF23992/HF41650/HF26074/HF33550/novel.146/HF23341/HF41212/HF12005/HF33556/HF10512/HF10508/HF05636/HF18869/HF05629/HF05628	-/-/-/-/-/-/-/-/-/-/-/-/-/-/-/-/-	17	12	HF15239/novel.184/HF23992/HF41650/HF33550/novel.146/HF23341/HF41212/HF12005/HF33556/HF05629/HF05628	5	HF26074/HF10512/HF10508/HF05636/HF18869
MF	GO:0016160	amylase activity	16/2710	48/16678	0.00277333	0.0772571	HF37337/HF04141/HF01223/HF21655/HF17970/HF19497/HF36717/HF30087/HF04121/HF13132/HF04116/HF04150/HF43199/HF36955/HF02052/novel.2945	-/-/-/-/-/-/-/-/-/-/-/-/-/-/-/-	16	7	HF21655/HF17970/HF36717/HF30087/HF13132/HF36955/novel.2945	9	HF37337/HF04141/HF01223/HF19497/HF04121/HF04116/HF04150/HF43199/HF02052
MF	GO:0015238	drug transmembrane transporter activity	23/2710	84/16678	0.00664337	0.172728	HF23526/HF19931/HF04077/HF32710/HF22347/novel.2473/HF17751/HF25758/HF42114/HF15075/HF17508/HF17501/HF17500/HF21174/HF18832/HF13813/HF25757/HF29111/HF43138/HF07827/HF29068/HF06980/HF01324	-/-/-/-/-/-/-/-/-/-/-/-/-/-/-/-/-/-/-/-/-/-/-	23	5	HF25758/HF17501/HF17500/HF25757/HF29111	18	HF23526/HF19931/HF04077/HF32710/HF22347/novel.2473/HF17751/HF42114/HF15075/HF17508/HF21174/HF18832/HF13813/HF43138/HF07827/HF29068/HF06980/HF01324
MF	GO:0016679	oxidoreductase activity, acting on diphenols and related substances as donors	10/2710	27/16678	0.00738335	0.179969	HF17954/HF12095/HF19550/HF17936/HF17677/HF16442/HF07315/HF02094/HF12093/HF17952	-/-/-/-/-/-/-/-/-/-	10	3	HF17954/HF17936/HF12093	7	HF12095/HF19550/HF17677/HF16442/HF07315/HF02094/HF17952
MF	GO:0046983	protein dimerization activity	100/2710	490/16678	0.00794956	0.180777	HF17455/HF14668/HF15239/HF21574/HF40361/novel.3736/HF44172/HF41561/HF23339/HF34983/novel.3351/HF44438/HF41568/HF08837/HF25170/novel.3575/HF23992/HF09251/HF36568/HF03443/novel.1683/HF17356/HF11140/HF22421/novel.3412/HF11588/HF40360/HF10386/HF08830/HF38231/HF12036/HF41650/HF37257/HF31558/HF25290/HF23950/novel.2328/HF28869/HF41691/novel.2188/HF12206/HF26074/HF33550/HF33799/HF07428/HF12193/novel.640/…	-/-/-/-/-/-/-/-/-/-/-/-/-/-/-/-/-/-/-/-/-/-/-/-/-/-/-/-/-/-/-/-/-/-/-/-/-/-/-/-/-/-/-/-/-/-/-/-/-/-/-/-/-/-/-/-/-/-/-/-/-/-/-/-/-/-/-/-/-/-/-/-/-/-/-/-/-/-/-/-/-/-/-/-/-/-/-/-/-/-/-/-/-/-/-/-/-/-/-/-	100	56	HF15239/HF21574/HF40361/HF44172/HF41561/HF23339/novel.3351/HF08837/HF25170/novel.3575/HF23992/HF17356/HF22421/novel.3412/HF11588/HF40360/HF10386/HF41650/HF23950/HF41691/HF33550/HF33799/HF07428/HF12193/HF28339/HF13039/HF23423/HF12005/HF17868/HF21634/HF33556/HF38368/HF35949/HF32365/HF14360/novel.2972/HF39803/HF04478/HF24160/HF14361/HF24610/HF09473/HF18053/HF32285/HF08705/HF08301/HF05629/HF41656/HF0…	44	HF17455/HF14668/novel.3736/HF34983/HF44438/HF41568/HF09251/HF36568/HF03443/novel.1683/HF11140/HF08830/HF38231/HF12036/HF37257/HF31558/HF25290/novel.2328/HF28869/novel.2188/HF12206/HF26074/novel.640/novel.1492/HF15774/HF10512/HF33878/HF10508/novel.854/HF05636/novel.981/HF42227/HF38015/HF43695/HF37240/HF28667/novel.2501/HF16324/HF04456/HF07331/HF08709/HF32695/novel.2489/HF00584
MF	GO:0016758	transferase activity, transferring hexosyl groups	79/2710	376/16678	0.00834356	0.180777	HF00982/HF10302/HF00861/HF35779/HF07649/HF34437/novel.3297/HF33666/HF40192/HF18355/HF04870/HF08105/HF10308/HF29041/HF00343/HF09500/HF18580/novel.2257/HF24821/HF07650/HF09333/HF10140/HF02157/HF29069/HF41998/HF05203/HF07358/HF00850/HF19048/HF38610/HF16214/HF02422/HF18945/HF39841/HF31763/HF11508/HF17210/HF33986/HF12659/HF07435/HF29132/HF18058/HF24599/HF29388/HF35129/HF29164/novel.3691/novel.3219/HF1…	-/-/-/-/-/-/-/-/-/-/-/-/-/-/-/-/-/-/-/-/-/-/-/-/-/-/-/-/-/-/-/-/-/-/-/-/-/-/-/-/-/-/-/-/-/-/-/-/-/-/-/-/-/-/-/-/-/-/-/-/-/-/-/-/-/-/-/-/-/-/-/-/-/-/-/-/-/-/-	79	35	HF00861/HF33666/HF18355/HF04870/HF29041/HF18580/novel.2257/HF24821/HF02157/HF41998/HF07358/HF38610/HF17210/HF33986/HF12659/HF07435/HF17213/HF40061/HF41760/novel.2360/HF33386/HF39770/HF33980/HF03123/HF41761/HF09483/novel.1942/HF39677/HF44371/HF29450/HF04907/HF02449/HF20497/HF24042/HF33388	44	HF00982/HF10302/HF35779/HF07649/HF34437/novel.3297/HF40192/HF08105/HF10308/HF00343/HF09500/HF07650/HF09333/HF10140/HF29069/HF05203/HF00850/HF19048/HF16214/HF02422/HF18945/HF39841/HF31763/HF11508/HF29132/HF18058/HF24599/HF29388/HF35129/HF29164/novel.3691/novel.3219/HF11999/HF03820/HF24586/HF18950/HF14488/HF38819/HF35736/HF32116/HF14285/HF00981/HF38627/novel.3352
MF	GO:0016762	xyloglucan:xyloglucosyl transferase activity	10/2710	28/16678	0.00984273	0.184416	HF00861/HF33666/HF29041/HF02157/HF41998/HF07358/HF16214/HF29450/HF04907/HF02449	-/-/-/-/-/-/-/-/-/-	10	9	HF00861/HF33666/HF29041/HF02157/HF41998/HF07358/HF29450/HF04907/HF02449	1	HF16214
MF	GO:0001871	pattern binding	16/2710	54/16678	0.00993007	0.184416	HF12276/HF11721/HF21722/HF32307/HF29113/HF06695/HF23182/HF17707/HF42130/HF12291/HF14309/HF07811/HF14306/novel.455/HF21721/HF26860	-/-/-/-/-/-/-/-/-/-/-/-/-/-/-/-	16	9	HF12276/HF11721/HF21722/HF32307/HF06695/HF42130/HF14309/HF07811/novel.455	7	HF29113/HF23182/HF17707/HF12291/HF14306/HF21721/HF26860
MF	GO:0030247	polysaccharide binding	16/2710	54/16678	0.00993007	0.184416	HF12276/HF11721/HF21722/HF32307/HF29113/HF06695/HF23182/HF17707/HF42130/HF12291/HF14309/HF07811/HF14306/novel.455/HF21721/HF26860	-/-/-/-/-/-/-/-/-/-/-/-/-/-/-/-	16	9	HF12276/HF11721/HF21722/HF32307/HF06695/HF42130/HF14309/HF07811/novel.455	7	HF29113/HF23182/HF17707/HF12291/HF14306/HF21721/HF26860
MF	GO:0043565	sequence-specific DNA binding	65/2710	308/16678	0.0141472	0.250792	HF42923/HF22028/HF38740/HF12689/HF30715/HF38364/HF22388/HF14958/HF37748/HF30538/HF24147/HF12857/HF04215/HF28543/HF10242/HF37713/HF42209/HF03015/HF27430/HF25788/HF36511/HF36475/HF11919/HF28065/HF21368/HF32511/HF32449/HF25000/novel.3292/HF05684/HF13232/HF26047/HF12936/HF23582/HF18146/HF12510/HF20489/HF37735/HF33148/HF40528/HF37925/HF00266/HF10204/HF18707/HF03203/HF31362/HF20303/HF21325/HF43643/HF32…	-/-/-/-/-/-/-/-/-/-/-/-/-/-/-/-/-/-/-/-/-/-/-/-/-/-/-/-/-/-/-/-/-/-/-/-/-/-/-/-/-/-/-/-/-/-/-/-/-/-/-/-/-/-/-/-/-/-/-/-/-/-/-/-/-	65	30	HF38740/HF38364/HF24147/HF04215/HF28543/HF42209/HF03015/HF27430/HF11919/HF32511/HF26047/HF12936/HF18146/HF20489/HF40528/HF31362/HF20303/HF21325/HF43643/HF32044/HF18219/HF28202/HF04300/HF16024/HF38512/HF20855/HF42478/HF23454/HF20012/HF02728	35	HF42923/HF22028/HF12689/HF30715/HF22388/HF14958/HF37748/HF30538/HF12857/HF10242/HF37713/HF25788/HF36511/HF36475/HF28065/HF21368/HF32449/HF25000/novel.3292/HF05684/HF13232/HF23582/HF12510/HF37735/HF33148/HF37925/HF00266/HF10204/HF18707/HF03203/HF09241/HF19799/HF41818/HF37926/HF44281
MF	GO:0030246	carbohydrate binding	44/2710	197/16678	0.0153783	0.260763	HF00381/HF35660/HF06215/HF12276/HF32091/HF03237/HF06698/HF41803/HF07435/HF19131/HF13528/HF21075/HF30873/HF08559/HF17911/HF11721/HF21722/HF42192/HF03233/HF06807/HF32307/HF03879/HF29113/HF06695/HF23182/HF24538/HF17707/HF00771/HF42130/HF15510/HF39833/HF12291/HF37802/HF14309/HF07811/HF14306/novel.455/HF03229/HF21721/HF15156/HF26860/HF03235/HF03876/HF04590	-/-/-/-/-/-/-/-/-/-/-/-/-/-/-/-/-/-/-/-/-/-/-/-/-/-/-/-/-/-/-/-/-/-/-/-/-/-/-/-/-/-/-/-	44	26	HF00381/HF35660/HF06215/HF12276/HF32091/HF06698/HF41803/HF07435/HF13528/HF21075/HF30873/HF11721/HF21722/HF03233/HF06807/HF32307/HF03879/HF06695/HF24538/HF42130/HF15510/HF14309/HF07811/novel.455/HF15156/HF03235	18	HF03237/HF19131/HF08559/HF17911/HF42192/HF29113/HF23182/HF17707/HF00771/HF39833/HF12291/HF37802/HF14306/HF03229/HF21721/HF26860/HF03876/HF04590
MF	GO:0022836	gated channel activity	13/2710	44/16678	0.0195514	0.305001	HF10618/HF10694/HF39007/HF03202/HF13222/HF21270/HF03910/HF34519/HF13223/HF10670/HF10686/HF30353/HF13031	-/-/-/-/-/-/-/-/-/-/-/-/-	13	9	HF10618/HF10694/HF39007/HF03202/HF13222/HF34519/HF13223/HF10670/HF10686	4	HF21270/HF03910/HF30353/HF13031
MF	GO:0022839	ion gated channel activity	13/2710	44/16678	0.0195514	0.305001	HF10618/HF10694/HF39007/HF03202/HF13222/HF21270/HF03910/HF34519/HF13223/HF10670/HF10686/HF30353/HF13031	-/-/-/-/-/-/-/-/-/-/-/-/-	13	9	HF10618/HF10694/HF39007/HF03202/HF13222/HF34519/HF13223/HF10670/HF10686	4	HF21270/HF03910/HF30353/HF13031
MF	GO:0015297	antiporter activity	32/2710	138/16678	0.0211566	0.317348	HF23526/HF19931/HF43202/HF04077/HF15920/HF32710/HF22347/HF25447/novel.2473/HF17751/HF20883/HF25758/HF42114/HF15075/HF17508/HF17501/HF28356/HF17500/HF21174/HF18832/HF13813/HF27944/HF08541/HF25757/HF29111/HF06794/HF43138/HF07827/HF29068/HF06980/HF01324/HF26664	-/-/-/-/-/-/-/-/-/-/-/-/-/-/-/-/-/-/-/-/-/-/-/-/-/-/-/-/-/-/-/-	32	9	HF15920/HF25447/HF25758/HF17501/HF17500/HF27944/HF08541/HF25757/HF29111	23	HF23526/HF19931/HF43202/HF04077/HF32710/HF22347/novel.2473/HF17751/HF20883/HF42114/HF15075/HF17508/HF28356/HF21174/HF18832/HF13813/HF06794/HF43138/HF07827/HF29068/HF06980/HF01324/HF26664
MF	GO:0016757	transferase activity, transferring glycosyl groups	96/2710	491/16678	0.0275362	0.397746	HF00982/HF05960/HF10302/HF00861/HF35779/HF07649/HF34437/novel.3297/HF33666/HF40192/HF18355/HF04870/HF08105/HF10308/HF29041/HF00343/HF09500/HF18580/novel.2257/HF24821/HF07650/HF09333/HF10140/HF02157/HF29069/HF11299/HF41998/HF05203/HF07358/HF00850/HF19048/HF38610/HF16214/HF02422/HF18945/HF39841/HF31763/novel.3166/HF11508/HF17210/HF33986/HF38780/HF12659/HF07435/HF29132/HF18058/HF43003/HF24599/HF2938…	-/-/-/-/-/-/-/-/-/-/-/-/-/-/-/-/-/-/-/-/-/-/-/-/-/-/-/-/-/-/-/-/-/-/-/-/-/-/-/-/-/-/-/-/-/-/-/-/-/-/-/-/-/-/-/-/-/-/-/-/-/-/-/-/-/-/-/-/-/-/-/-/-/-/-/-/-/-/-/-/-/-/-/-/-/-/-/-/-/-/-/-/-/-/-/-	96	43	HF00861/HF33666/HF18355/HF04870/HF29041/HF18580/novel.2257/HF24821/HF02157/HF11299/HF41998/HF07358/HF38610/novel.3166/HF17210/HF33986/HF12659/HF07435/HF30623/HF29032/HF17213/HF40061/HF41760/novel.2360/HF33386/HF39770/HF33980/HF03123/HF41761/HF09483/novel.1942/HF39677/HF44371/HF29450/HF04907/HF02449/HF20497/HF18822/HF21168/HF24042/HF33388/HF02757/HF17525	53	HF00982/HF05960/HF10302/HF35779/HF07649/HF34437/novel.3297/HF40192/HF08105/HF10308/HF00343/HF09500/HF07650/HF09333/HF10140/HF29069/HF05203/HF00850/HF19048/HF16214/HF02422/HF18945/HF39841/HF31763/HF11508/HF38780/HF29132/HF18058/HF43003/HF24599/HF29388/HF35129/HF29164/novel.3691/novel.3219/HF11999/HF03820/HF42603/HF24586/HF26606/HF18950/HF14488/novel.3302/HF38819/HF35736/HF32116/HF42528/HF20480/nov…
MF	GO:0015291	secondary active transmembrane transporter activity	34/2710	153/16678	0.0322781	0.425805	HF23526/HF19931/HF43202/HF04077/HF15920/HF32710/HF22347/HF25447/novel.2473/HF17751/HF20883/HF25758/HF42114/HF15075/HF17508/HF17501/HF28356/HF17500/HF21174/HF41837/HF18832/HF13813/HF27944/HF08541/HF25757/HF29111/HF06794/HF43138/HF07827/HF29068/HF06980/HF10626/HF01324/HF26664	-/-/-/-/-/-/-/-/-/-/-/-/-/-/-/-/-/-/-/-/-/-/-/-/-/-/-/-/-/-/-/-/-/-	34	11	HF15920/HF25447/HF25758/HF17501/HF17500/HF41837/HF27944/HF08541/HF25757/HF29111/HF10626	23	HF23526/HF19931/HF43202/HF04077/HF32710/HF22347/novel.2473/HF17751/HF20883/HF42114/HF15075/HF17508/HF28356/HF21174/HF18832/HF13813/HF06794/HF43138/HF07827/HF29068/HF06980/HF01324/HF26664
MF	GO:0022804	active transmembrane transporter activity	52/2710	251/16678	0.0353353	0.425805	HF20998/HF31989/HF23526/HF19931/HF28478/HF43202/HF03359/HF04077/HF43582/HF05696/HF42661/HF28481/HF15920/HF15791/HF32710/HF22347/HF25447/novel.2473/HF17751/HF20883/HF25758/HF04432/HF42114/HF15075/HF26339/HF17508/HF17501/HF02777/HF37328/HF28356/HF26340/HF17500/HF03364/HF31992/HF21174/HF41837/HF18832/HF13813/HF27944/HF08541/HF15622/HF25757/HF29111/HF06794/HF37943/HF43138/HF07827/HF29068/HF06980/HF10…	-/-/-/-/-/-/-/-/-/-/-/-/-/-/-/-/-/-/-/-/-/-/-/-/-/-/-/-/-/-/-/-/-/-/-/-/-/-/-/-/-/-/-/-/-/-/-/-/-/-/-/-	52	19	HF31989/HF03359/HF15920/HF15791/HF25447/HF25758/HF17501/HF02777/HF37328/HF26340/HF17500/HF41837/HF27944/HF08541/HF15622/HF25757/HF29111/HF37943/HF10626	33	HF20998/HF23526/HF19931/HF28478/HF43202/HF04077/HF43582/HF05696/HF42661/HF28481/HF32710/HF22347/novel.2473/HF17751/HF20883/HF04432/HF42114/HF15075/HF26339/HF17508/HF28356/HF03364/HF31992/HF21174/HF18832/HF13813/HF06794/HF43138/HF07827/HF29068/HF06980/HF01324/HF26664
MF	GO:0005216	ion channel activity	23/2710	97/16678	0.0360296	0.425805	HF32197/HF18741/HF24477/HF10618/HF10694/HF09599/HF39007/HF03202/HF38621/HF13222/HF21270/HF03910/HF34519/HF40539/HF13223/HF26009/HF10670/HF23399/HF24211/HF10686/HF11939/HF30353/HF13031	-/-/-/-/-/-/-/-/-/-/-/-/-/-/-/-/-/-/-/-/-/-/-	23	14	HF24477/HF10618/HF10694/HF09599/HF39007/HF03202/HF13222/HF34519/HF13223/HF10670/HF23399/HF24211/HF10686/HF11939	9	HF32197/HF18741/HF38621/HF21270/HF03910/HF40539/HF26009/HF30353/HF13031
MF	GO:0015267	channel activity	23/2710	97/16678	0.0360296	0.425805	HF32197/HF18741/HF24477/HF10618/HF10694/HF09599/HF39007/HF03202/HF38621/HF13222/HF21270/HF03910/HF34519/HF40539/HF13223/HF26009/HF10670/HF23399/HF24211/HF10686/HF11939/HF30353/HF13031	-/-/-/-/-/-/-/-/-/-/-/-/-/-/-/-/-/-/-/-/-/-/-	23	14	HF24477/HF10618/HF10694/HF09599/HF39007/HF03202/HF13222/HF34519/HF13223/HF10670/HF23399/HF24211/HF10686/HF11939	9	HF32197/HF18741/HF38621/HF21270/HF03910/HF40539/HF26009/HF30353/HF13031
MF	GO:0022803	passive transmembrane transporter activity	23/2710	97/16678	0.0360296	0.425805	HF32197/HF18741/HF24477/HF10618/HF10694/HF09599/HF39007/HF03202/HF38621/HF13222/HF21270/HF03910/HF34519/HF40539/HF13223/HF26009/HF10670/HF23399/HF24211/HF10686/HF11939/HF30353/HF13031	-/-/-/-/-/-/-/-/-/-/-/-/-/-/-/-/-/-/-/-/-/-/-	23	14	HF24477/HF10618/HF10694/HF09599/HF39007/HF03202/HF13222/HF34519/HF13223/HF10670/HF23399/HF24211/HF10686/HF11939	9	HF32197/HF18741/HF38621/HF21270/HF03910/HF40539/HF26009/HF30353/HF13031
MF	GO:0022838	substrate-specific channel activity	23/2710	97/16678	0.0360296	0.425805	HF32197/HF18741/HF24477/HF10618/HF10694/HF09599/HF39007/HF03202/HF38621/HF13222/HF21270/HF03910/HF34519/HF40539/HF13223/HF26009/HF10670/HF23399/HF24211/HF10686/HF11939/HF30353/HF13031	-/-/-/-/-/-/-/-/-/-/-/-/-/-/-/-/-/-/-/-/-/-/-	23	14	HF24477/HF10618/HF10694/HF09599/HF39007/HF03202/HF13222/HF34519/HF13223/HF10670/HF23399/HF24211/HF10686/HF11939	9	HF32197/HF18741/HF38621/HF21270/HF03910/HF40539/HF26009/HF30353/HF13031
MF	GO:0016701	oxidoreductase activity, acting on single donors with incorporation of molecular oxygen	16/2710	63/16678	0.0414494	0.429209	HF33245/novel.80/HF38747/HF16918/HF21287/HF13329/HF07361/HF15876/HF43327/HF22773/HF16927/HF13896/novel.2637/HF00494/HF15881/HF39655	-/-/-/-/-/-/-/-/-/-/-/-/-/-/-/-	16	11	HF33245/novel.80/HF38747/HF16918/HF21287/HF07361/HF15876/HF43327/HF13896/novel.2637/HF39655	5	HF13329/HF22773/HF16927/HF00494/HF15881
MF	GO:0005244	voltage-gated ion channel activity	6/2710	17/16678	0.045122	0.429209	HF10694/HF39007/HF34519/HF10670/HF10686/HF30353	-/-/-/-/-/-	6	5	HF10694/HF39007/HF34519/HF10670/HF10686	1	HF30353
MF	GO:0005247	voltage-gated chloride channel activity	6/2710	17/16678	0.045122	0.429209	HF10694/HF39007/HF34519/HF10670/HF10686/HF30353	-/-/-/-/-/-	6	5	HF10694/HF39007/HF34519/HF10670/HF10686	1	HF30353
MF	GO:0005253	anion channel activity	6/2710	17/16678	0.045122	0.429209	HF10694/HF39007/HF34519/HF10670/HF10686/HF30353	-/-/-/-/-/-	6	5	HF10694/HF39007/HF34519/HF10670/HF10686	1	HF30353
MF	GO:0005254	chloride channel activity	6/2710	17/16678	0.045122	0.429209	HF10694/HF39007/HF34519/HF10670/HF10686/HF30353	-/-/-/-/-/-	6	5	HF10694/HF39007/HF34519/HF10670/HF10686	1	HF30353
MF	GO:0008308	voltage-gated anion channel activity	6/2710	17/16678	0.045122	0.429209	HF10694/HF39007/HF34519/HF10670/HF10686/HF30353	-/-/-/-/-/-	6	5	HF10694/HF39007/HF34519/HF10670/HF10686	1	HF30353
MF	GO:0015108	chloride transmembrane transporter activity	6/2710	17/16678	0.045122	0.429209	HF10694/HF39007/HF34519/HF10670/HF10686/HF30353	-/-/-/-/-/-	6	5	HF10694/HF39007/HF34519/HF10670/HF10686	1	HF30353
MF	GO:0022832	voltage-gated channel activity	6/2710	17/16678	0.045122	0.429209	HF10694/HF39007/HF34519/HF10670/HF10686/HF30353	-/-/-/-/-/-	6	5	HF10694/HF39007/HF34519/HF10670/HF10686	1	HF30353
MF	GO:0004097	catechol oxidase activity	5/2710	13/16678	0.0464086	0.430937	HF17954/HF12095/HF17936/HF12093/HF17952	-/-/-/-/-	5	3	HF17954/HF17936/HF12093	2	HF12095/HF17952
MF	GO:0016835	carbon-oxygen lyase activity	24/2710	105/16678	0.0482482	0.4376	HF17735/HF18751/HF13317/HF29432/HF12987/HF11858/HF18762/novel.1499/HF06279/HF41479/HF03427/HF09812/HF03677/HF12196/HF38285/HF18749/HF14426/HF03428/HF34430/HF29529/HF18748/HF22080/HF29081/HF29445	-/-/-/-/-/-/-/-/-/-/-/-/-/-/-/-/-/-/-/-/-/-/-/-	24	20	HF17735/HF18751/HF13317/HF29432/HF12987/HF18762/novel.1499/HF06279/HF03427/HF09812/HF03677/HF12196/HF38285/HF18749/HF03428/HF34430/HF29529/HF18748/HF22080/HF29445	4	HF11858/HF41479/HF14426/HF29081
MF	GO:0016702	oxidoreductase activity, acting on single donors with incorporation of molecular oxygen, incorporation of two atoms of oxygen	13/2710	50/16678	0.0525828	0.464097	HF33245/novel.80/HF38747/HF16918/HF07361/HF15876/HF43327/HF22773/HF16927/HF13896/novel.2637/HF00494/HF15881	-/-/-/-/-/-/-/-/-/-/-/-/-	13	9	HF33245/novel.80/HF38747/HF16918/HF07361/HF15876/HF43327/HF13896/novel.2637	4	HF22773/HF16927/HF00494/HF15881
MF	GO:0030599	pectinesterase activity	16/2710	65/16678	0.0535497	0.464097	HF19108/HF30633/HF00950/HF15830/novel.718/HF00959/HF23736/HF18834/HF07920/HF25660/novel.719/HF00958/HF30850/novel.731/HF23779/HF29692	-/-/-/-/-/-/-/-/-/-/-/-/-/-/-/-	16	7	HF19108/HF00950/HF00959/HF07920/HF00958/novel.731/HF29692	9	HF30633/HF15830/novel.718/HF23736/HF18834/HF25660/novel.719/HF30850/HF23779
MF	GO:0016836	hydro-lyase activity	15/2710	61/16678	0.0607513	0.482647	HF17735/HF18751/HF13317/HF12987/HF11858/HF18762/novel.1499/HF06279/HF09812/HF38285/HF18749/HF14426/HF34430/HF18748/HF29081	-/-/-/-/-/-/-/-/-/-/-/-/-/-/-	15	12	HF17735/HF18751/HF13317/HF12987/HF18762/novel.1499/HF06279/HF09812/HF38285/HF18749/HF34430/HF18748	3	HF11858/HF14426/HF29081
MF	GO:0050660	flavin adenine dinucleotide binding	31/2710	145/16678	0.0620317	0.482647	HF34283/HF31366/HF10556/HF05786/HF36403/HF29995/HF11706/HF37388/HF36479/HF10346/HF24802/HF10349/HF05780/HF19983/HF29012/HF12527/HF21079/HF02856/HF03666/HF30727/HF23174/HF10457/HF12889/HF11697/HF40292/HF24800/HF34282/novel.2088/HF05665/HF00389/HF10347	-/-/-/-/-/-/-/-/-/-/-/-/-/-/-/-/-/-/-/-/-/-/-/-/-/-/-/-/-/-/-	31	11	HF05786/HF29995/HF24802/HF12527/HF21079/HF03666/HF30727/HF11697/HF40292/HF34282/HF00389	20	HF34283/HF31366/HF10556/HF36403/HF11706/HF37388/HF36479/HF10346/HF10349/HF05780/HF19983/HF29012/HF02856/HF23174/HF10457/HF12889/HF24800/novel.2088/HF05665/HF10347
MF	GO:0047325	inositol tetrakisphosphate 1-kinase activity	4/2710	10/16678	0.0643529	0.482647	HF26148/HF34836/HF08098/HF37266	-/-/-/-	4	2	HF34836/HF08098	2	HF26148/HF37266
MF	GO:0050664	oxidoreductase activity, acting on NAD(P)H, oxygen as acceptor	4/2710	10/16678	0.0643529	0.482647	HF08509/HF19073/HF30845/HF42906	-/-/-/-	4	2	HF08509/HF42906	2	HF19073/HF30845
MF	GO:0051765	inositol tetrakisphosphate kinase activity	4/2710	10/16678	0.0643529	0.482647	HF26148/HF34836/HF08098/HF37266	-/-/-/-	4	2	HF34836/HF08098	2	HF26148/HF37266
MF	GO:0052725	inositol-1,3,4-trisphosphate 6-kinase activity	4/2710	10/16678	0.0643529	0.482647	HF26148/HF34836/HF08098/HF37266	-/-/-/-	4	2	HF34836/HF08098	2	HF26148/HF37266
MF	GO:0052726	inositol-1,3,4-trisphosphate 5-kinase activity	4/2710	10/16678	0.0643529	0.482647	HF26148/HF34836/HF08098/HF37266	-/-/-/-	4	2	HF34836/HF08098	2	HF26148/HF37266
MF	GO:0016829	lyase activity	43/2710	212/16678	0.0686539	0.505189	HF17735/HF18751/HF42124/HF07624/HF13317/HF32087/HF29432/HF19040/HF38483/HF12987/HF42711/HF11858/HF18762/HF39239/novel.1499/HF06279/HF42272/HF31655/HF41479/HF15125/HF03427/HF09812/HF03677/HF12196/HF38285/HF18749/HF26149/HF14426/HF13201/HF02735/HF06019/HF42246/HF03428/HF34430/HF29529/HF18748/HF35114/novel.2006/HF08006/HF22080/HF42271/HF29081/HF29445	-/-/-/-/-/-/-/-/-/-/-/-/-/-/-/-/-/-/-/-/-/-/-/-/-/-/-/-/-/-/-/-/-/-/-/-/-/-/-/-/-/-/-	43	30	HF17735/HF18751/HF42124/HF13317/HF29432/HF19040/HF12987/HF42711/HF18762/HF39239/novel.1499/HF06279/HF15125/HF03427/HF09812/HF03677/HF12196/HF38285/HF18749/HF02735/HF06019/HF42246/HF03428/HF34430/HF29529/HF18748/novel.2006/HF22080/HF42271/HF29445	13	HF07624/HF32087/HF38483/HF11858/HF42272/HF31655/HF41479/HF26149/HF14426/HF13201/HF35114/HF08006/HF29081
MF	GO:0010333	terpene synthase activity	9/2710	33/16678	0.075405	0.528191	HF29432/HF41479/HF03427/HF03677/HF12196/HF03428/HF29529/HF22080/HF29445	-/-/-/-/-/-/-/-/-	9	8	HF29432/HF03427/HF03677/HF12196/HF03428/HF29529/HF22080/HF29445	1	HF41479
MF	GO:0005507	copper ion binding	20/2710	89/16678	0.0773909	0.528191	HF10518/HF06541/HF01447/HF31284/novel.694/HF29378/HF03283/HF09080/HF27892/HF27489/HF06309/HF06464/HF23740/HF12482/HF23917/HF25317/HF23293/HF13903/HF22415/HF39259	-/-/-/-/-/-/-/-/-/-/-/-/-/-/-/-/-/-/-/-	20	9	HF10518/HF01447/HF31284/HF27489/HF23740/HF12482/HF23917/HF25317/HF23293	11	HF06541/novel.694/HF29378/HF03283/HF09080/HF27892/HF06309/HF06464/HF13903/HF22415/HF39259
MF	GO:0052689	carboxylic ester hydrolase activity	23/2710	105/16678	0.0782403	0.528191	HF19108/HF30633/HF00950/HF15830/novel.718/novel.2231/HF00959/HF17700/HF23736/HF18834/HF12829/HF07920/HF25660/HF28207/HF12460/HF07640/novel.719/HF43926/HF00958/HF30850/novel.731/HF23779/HF29692	-/-/-/-/-/-/-/-/-/-/-/-/-/-/-/-/-/-/-/-/-/-/-	23	13	HF19108/HF00950/novel.2231/HF00959/HF12829/HF07920/HF28207/HF12460/HF07640/HF43926/HF00958/novel.731/HF29692	10	HF30633/HF15830/novel.718/HF17700/HF23736/HF18834/HF25660/novel.719/HF30850/HF23779
MF	GO:0004497	monooxygenase activity	11/2710	43/16678	0.0784364	0.528191	HF10556/HF21287/HF13329/HF10346/HF24802/HF10349/HF02856/HF12889/HF24800/HF10347/HF39655	-/-/-/-/-/-/-/-/-/-/-	11	3	HF21287/HF24802/HF39655	8	HF10556/HF13329/HF10346/HF10349/HF02856/HF12889/HF24800/HF10347
MF	GO:0051213	dioxygenase activity	13/2710	53/16678	0.0785515	0.528191	HF33245/novel.80/HF38747/HF16918/HF07361/HF15876/HF43327/HF22773/HF16927/HF13896/novel.2637/HF00494/HF15881	-/-/-/-/-/-/-/-/-/-/-/-/-	13	9	HF33245/novel.80/HF38747/HF16918/HF07361/HF15876/HF43327/HF13896/novel.2637	4	HF22773/HF16927/HF00494/HF15881
MF	GO:0005544	calcium-dependent phospholipid binding	5/2710	15/16678	0.0820538	0.53335	HF16685/HF06828/HF06827/HF17591/HF07986	-/-/-/-/-	5	4	HF06828/HF06827/HF17591/HF07986	1	HF16685
MF	GO:0030983	mismatched DNA binding	5/2710	15/16678	0.0820538	0.53335	HF25801/HF28512/HF17984/HF03488/HF01279	-/-/-/-/-	5	2	HF28512/HF03488	3	HF25801/HF17984/HF01279
MF	GO:0004888	transmembrane signaling receptor activity	8/2710	29/16678	0.0859254	0.549359	HF36175/HF10618/HF03202/HF13222/HF21270/HF03910/HF13223/HF13031	-/-/-/-/-/-/-/-	8	4	HF10618/HF03202/HF13222/HF13223	4	HF36175/HF21270/HF03910/HF13031
MF	GO:0050662	coenzyme binding	78/2710	418/16678	0.100645	0.614726	HF34283/HF38361/HF28915/HF31366/HF10556/HF32404/HF41298/HF42672/HF17306/HF10167/HF06916/HF05786/HF36403/HF23027/HF29995/HF04461/HF11706/HF15559/HF36231/HF43437/HF37388/HF34653/HF10032/HF34875/HF36479/HF24385/HF10346/HF24802/HF21272/HF10349/HF05780/HF19983/HF38953/HF29012/HF03224/HF27205/HF17326/HF26207/HF15125/HF12527/HF17312/HF00046/HF14770/HF17307/HF21079/HF02856/HF34500/HF03666/HF30727/HF23174…	-/-/-/-/-/-/-/-/-/-/-/-/-/-/-/-/-/-/-/-/-/-/-/-/-/-/-/-/-/-/-/-/-/-/-/-/-/-/-/-/-/-/-/-/-/-/-/-/-/-/-/-/-/-/-/-/-/-/-/-/-/-/-/-/-/-/-/-/-/-/-/-/-/-/-/-/-/-	78	38	HF28915/HF41298/HF10167/HF06916/HF05786/HF23027/HF29995/HF04461/HF15559/HF36231/HF43437/HF34653/HF24802/HF17326/HF15125/HF12527/HF00046/HF14770/HF21079/HF34500/HF03666/HF30727/HF16809/HF06913/HF06915/HF22178/HF11697/HF04049/HF40292/HF14845/HF15072/HF42189/HF27275/HF34282/HF17305/HF00389/HF12199/HF32403	40	HF34283/HF38361/HF31366/HF10556/HF32404/HF42672/HF17306/HF36403/HF11706/HF37388/HF10032/HF34875/HF36479/HF24385/HF10346/HF21272/HF10349/HF05780/HF19983/HF38953/HF29012/HF03224/HF27205/HF26207/HF17312/HF17307/HF02856/HF23174/HF10457/HF16813/HF12889/HF16021/HF25184/HF17308/HF17311/HF24800/novel.2088/HF08006/HF05665/HF10347
MF	GO:0045735	nutrient reservoir activity	11/2710	45/16678	0.102358	0.614726	HF34648/HF40774/HF05909/HF31192/HF34647/HF06247/HF20011/HF14258/HF09615/HF11087/HF01743	-/-/-/-/-/-/-/-/-/-/-	11	4	HF40774/HF31192/HF20011/HF01743	7	HF34648/HF05909/HF34647/HF06247/HF14258/HF09615/HF11087
MF	GO:0003854	3-beta-hydroxy-delta5-steroid dehydrogenase activity	5/2710	16/16678	0.104031	0.614726	HF38840/HF37260/HF21247/HF23269/HF16814	-/-/-/-/-	5	1	HF23269	4	HF38840/HF37260/HF21247/HF16814
MF	GO:0016229	steroid dehydrogenase activity	5/2710	16/16678	0.104031	0.614726	HF38840/HF37260/HF21247/HF23269/HF16814	-/-/-/-/-	5	1	HF23269	4	HF38840/HF37260/HF21247/HF16814
MF	GO:0033764	steroid dehydrogenase activity, acting on the CH-OH group of donors, NAD or NADP as acceptor	5/2710	16/16678	0.104031	0.614726	HF38840/HF37260/HF21247/HF23269/HF16814	-/-/-/-/-	5	1	HF23269	4	HF38840/HF37260/HF21247/HF16814
MF	GO:0016747	transferase activity, transferring acyl groups other than amino-acyl groups	47/2710	243/16678	0.111141	0.64694	HF21620/HF29885/HF07750/HF15733/HF18078/HF13151/HF33484/HF37648/HF33891/HF32495/HF29878/HF30930/HF34498/HF19136/HF35196/HF17436/HF31589/HF24500/HF06721/HF13670/HF38352/HF42282/HF13940/HF29223/HF03389/HF01451/HF21248/HF00821/HF00824/HF10164/HF11292/HF21966/HF41513/HF31385/HF35199/HF27404/HF04674/HF42768/HF09044/novel.217/HF06051/HF32368/HF23663/HF14520/HF24195/HF37128/HF29623	-/-/-/-/-/-/-/-/-/-/-/-/-/-/-/-/-/-/-/-/-/-/-/-/-/-/-/-/-/-/-/-/-/-/-/-/-/-/-/-/-/-/-/-/-/-/-	47	24	HF07750/HF29878/HF34498/HF35196/HF17436/HF24500/HF38352/HF13940/HF29223/HF03389/HF01451/HF21248/HF00821/HF00824/HF10164/HF11292/HF21966/HF41513/HF27404/HF42768/HF09044/HF32368/HF24195/HF37128	23	HF21620/HF29885/HF15733/HF18078/HF13151/HF33484/HF37648/HF33891/HF32495/HF30930/HF19136/HF31589/HF06721/HF13670/HF42282/HF31385/HF35199/HF04674/novel.217/HF06051/HF23663/HF14520/HF29623
MF	GO:0051766	inositol trisphosphate kinase activity	4/2710	12/16678	0.116356	0.65559	HF26148/HF34836/HF08098/HF37266	-/-/-/-	4	2	HF34836/HF08098	2	HF26148/HF37266
MF	GO:0005509	calcium ion binding	49/2710	256/16678	0.120516	0.65559	HF41257/HF16685/HF09162/HF41775/HF15792/HF21655/HF10630/HF03525/HF27164/HF11720/HF20686/HF09168/HF08797/HF15642/HF16885/HF05266/HF06828/HF42420/HF06997/HF21662/HF11721/HF25969/HF20509/HF06827/HF17591/HF09216/HF33287/HF12458/HF23182/novel.2980/HF03517/HF30382/HF08414/HF32241/HF31723/HF36860/HF13016/HF20356/HF03678/HF11638/HF29503/HF28950/HF07986/HF40750/HF32414/HF03200/novel.1767/HF37456/HF32983	-/-/-/-/-/-/-/-/-/-/-/-/-/-/-/-/-/-/-/-/-/-/-/-/-/-/-/-/-/-/-/-/-/-/-/-/-/-/-/-/-/-/-/-/-/-/-/-/-	49	27	HF41257/HF09162/HF41775/HF15792/HF21655/HF10630/HF27164/HF11720/HF20686/HF09168/HF08797/HF16885/HF06828/HF21662/HF11721/HF06827/HF17591/HF03517/HF30382/HF31723/HF13016/HF11638/HF29503/HF28950/HF07986/HF32414/HF03200	22	HF16685/HF03525/HF15642/HF05266/HF42420/HF06997/HF25969/HF20509/HF09216/HF33287/HF12458/HF23182/novel.2980/HF08414/HF32241/HF36860/HF20356/HF03678/HF40750/novel.1767/HF37456/HF32983
MF	GO:0016887	ATPase activity	44/2710	229/16678	0.129255	0.65559	HF09309/HF09522/HF20998/HF31989/HF24813/HF38047/HF41084/HF28478/HF39183/HF03359/HF05224/HF03225/HF14203/HF11068/HF43582/HF05696/HF42661/HF28481/HF09849/HF14176/HF36483/HF04432/HF13779/HF05220/HF26359/HF26339/HF15825/HF02777/HF06014/HF37328/HF26340/HF28270/HF30503/HF03364/HF31992/HF00276/HF09521/HF15622/HF32047/HF16835/HF37943/HF20183/HF36484/HF15172	-/-/-/-/-/-/-/-/-/-/-/-/-/-/-/-/-/-/-/-/-/-/-/-/-/-/-/-/-/-/-/-/-/-/-/-/-/-/-/-/-/-/-/-	44	21	HF09522/HF31989/HF39183/HF03359/HF05224/HF03225/HF14203/HF13779/HF05220/HF26359/HF02777/HF37328/HF26340/HF28270/HF09521/HF15622/HF32047/HF16835/HF37943/HF20183/HF36484	23	HF09309/HF20998/HF24813/HF38047/HF41084/HF28478/HF11068/HF43582/HF05696/HF42661/HF28481/HF09849/HF14176/HF36483/HF04432/HF26339/HF15825/HF06014/HF30503/HF03364/HF31992/HF00276/HF15172
MF	GO:0004185	serine-type carboxypeptidase activity	11/2710	47/16678	0.130107	0.65559	HF41921/HF25024/HF08133/HF08055/HF08144/HF21709/HF42860/HF06899/HF16798/HF31608/HF07877	-/-/-/-/-/-/-/-/-/-/-	11	4	HF41921/HF25024/HF08055/HF42860	7	HF08133/HF08144/HF21709/HF06899/HF16798/HF31608/HF07877
MF	GO:0016838	carbon-oxygen lyase activity, acting on phosphates	9/2710	37/16678	0.134804	0.65559	HF29432/HF41479/HF03427/HF03677/HF12196/HF03428/HF29529/HF22080/HF29445	-/-/-/-/-/-/-/-/-	9	8	HF29432/HF03427/HF03677/HF12196/HF03428/HF29529/HF22080/HF29445	1	HF41479
MF	GO:0008081	phosphoric diester hydrolase activity	8/2710	32/16678	0.136112	0.65559	HF18174/HF31761/novel.2210/HF39067/HF32922/HF03399/HF35994/HF08790	-/-/-/-/-/-/-/-	8	6	HF18174/novel.2210/HF39067/HF32922/HF03399/HF35994	2	HF31761/HF08790
MF	GO:0004970	ionotropic glutamate receptor activity	7/2710	27/16678	0.136161	0.65559	HF10618/HF03202/HF13222/HF21270/HF03910/HF13223/HF13031	-/-/-/-/-/-/-	7	4	HF10618/HF03202/HF13222/HF13223	3	HF21270/HF03910/HF13031
MF	GO:0005230	extracellular ligand-gated ion channel activity	7/2710	27/16678	0.136161	0.65559	HF10618/HF03202/HF13222/HF21270/HF03910/HF13223/HF13031	-/-/-/-/-/-/-	7	4	HF10618/HF03202/HF13222/HF13223	3	HF21270/HF03910/HF13031
MF	GO:0008066	glutamate receptor activity	7/2710	27/16678	0.136161	0.65559	HF10618/HF03202/HF13222/HF21270/HF03910/HF13223/HF13031	-/-/-/-/-/-/-	7	4	HF10618/HF03202/HF13222/HF13223	3	HF21270/HF03910/HF13031
MF	GO:0015276	ligand-gated ion channel activity	7/2710	27/16678	0.136161	0.65559	HF10618/HF03202/HF13222/HF21270/HF03910/HF13223/HF13031	-/-/-/-/-/-/-	7	4	HF10618/HF03202/HF13222/HF13223	3	HF21270/HF03910/HF13031
MF	GO:0022824	transmitter-gated ion channel activity	7/2710	27/16678	0.136161	0.65559	HF10618/HF03202/HF13222/HF21270/HF03910/HF13223/HF13031	-/-/-/-/-/-/-	7	4	HF10618/HF03202/HF13222/HF13223	3	HF21270/HF03910/HF13031
MF	GO:0022834	ligand-gated channel activity	7/2710	27/16678	0.136161	0.65559	HF10618/HF03202/HF13222/HF21270/HF03910/HF13223/HF13031	-/-/-/-/-/-/-	7	4	HF10618/HF03202/HF13222/HF13223	3	HF21270/HF03910/HF13031
MF	GO:0022835	transmitter-gated channel activity	7/2710	27/16678	0.136161	0.65559	HF10618/HF03202/HF13222/HF21270/HF03910/HF13223/HF13031	-/-/-/-/-/-/-	7	4	HF10618/HF03202/HF13222/HF13223	3	HF21270/HF03910/HF13031
MF	GO:0030594	neurotransmitter receptor activity	7/2710	27/16678	0.136161	0.65559	HF10618/HF03202/HF13222/HF21270/HF03910/HF13223/HF13031	-/-/-/-/-/-/-	7	4	HF10618/HF03202/HF13222/HF13223	3	HF21270/HF03910/HF13031
MF	GO:0070008	serine-type exopeptidase activity	12/2710	53/16678	0.141426	0.672634	HF41921/HF25024/HF08133/HF08055/HF08144/HF20959/HF21709/HF42860/HF06899/HF16798/HF31608/HF07877	-/-/-/-/-/-/-/-/-/-/-/-	12	5	HF41921/HF25024/HF08055/HF20959/HF42860	7	HF08133/HF08144/HF21709/HF06899/HF16798/HF31608/HF07877
MF	GO:0004857	enzyme inhibitor activity	21/2710	102/16678	0.145661	0.676504	HF19108/HF38047/HF42043/HF23728/HF00950/HF23730/HF15830/HF03088/novel.718/HF04741/HF37561/HF23736/HF07920/HF25660/HF01867/HF40706/novel.719/HF26438/HF00958/HF38050/HF29692	-/-/-/-/-/-/-/-/-/-/-/-/-/-/-/-/-/-/-/-/-	21	9	HF19108/HF23728/HF00950/HF23730/HF37561/HF07920/HF00958/HF38050/HF29692	12	HF38047/HF42043/HF15830/HF03088/novel.718/HF04741/HF23736/HF25660/HF01867/HF40706/novel.719/HF26438
MF	GO:0004612	phosphoenolpyruvate carboxykinase (ATP) activity	4/2710	13/16678	0.147443	0.676504	HF32087/HF42711/HF39239/HF26149	-/-/-/-	4	2	HF42711/HF39239	2	HF32087/HF26149
MF	GO:0048038	quinone binding	4/2710	13/16678	0.147443	0.676504	HF38761/HF06541/HF09080/HF13903	-/-/-/-	4	1	HF38761	3	HF06541/HF09080/HF13903
MF	GO:0015103	inorganic anion transmembrane transporter activity	9/2710	38/16678	0.152617	0.692101	HF23371/HF10694/HF39007/HF34519/HF10670/HF10686/HF17231/HF34001/HF30353	-/-/-/-/-/-/-/-/-	9	7	HF23371/HF10694/HF39007/HF34519/HF10670/HF10686/HF34001	2	HF17231/HF30353
MF	GO:0004222	metalloendopeptidase activity	11/2710	49/16678	0.161527	0.724087	HF06373/HF20945/HF13661/HF25700/HF33481/HF32192/HF12789/HF33722/HF05567/HF33184/HF24923	-/-/-/-/-/-/-/-/-/-/-	11	3	HF25700/HF12789/HF33184	8	HF06373/HF20945/HF13661/HF33481/HF32192/HF33722/HF05567/HF24923
MF	GO:0016709	oxidoreductase activity, acting on paired donors, with incorporation or reduction of molecular oxygen, NAD(P)H as one donor, and incorporation of one atom of oxygen	8/2710	34/16678	0.176192	0.772077	HF10556/HF10346/HF24802/HF10349/HF02856/HF12889/HF24800/HF10347	-/-/-/-/-/-/-/-	8	1	HF24802	7	HF10556/HF10346/HF10349/HF02856/HF12889/HF24800/HF10347
MF	GO:0050661	NADP binding	8/2710	34/16678	0.176192	0.772077	HF10556/HF41298/HF34875/HF24802/HF26207/HF02856/HF12889/HF24800	-/-/-/-/-/-/-/-	8	2	HF41298/HF24802	6	HF10556/HF34875/HF26207/HF02856/HF12889/HF24800
MF	GO:0004180	carboxypeptidase activity	11/2710	50/16678	0.178529	0.773626	HF41921/HF25024/HF08133/HF08055/HF08144/HF21709/HF42860/HF06899/HF16798/HF31608/HF07877	-/-/-/-/-/-/-/-/-/-/-	11	4	HF41921/HF25024/HF08055/HF42860	7	HF08133/HF08144/HF21709/HF06899/HF16798/HF31608/HF07877
MF	GO:0004611	phosphoenolpyruvate carboxykinase activity	5/2710	19/16678	0.184418	0.790362	HF32087/HF42711/HF39239/HF26149/HF42246	-/-/-/-/-	5	3	HF42711/HF39239/HF42246	2	HF32087/HF26149
MF	GO:0038023	signaling receptor activity	12/2710	56/16678	0.188883	0.792089	HF11865/HF42003/HF36175/HF10618/HF18204/HF03202/HF13222/HF21270/HF03910/HF13223/HF02736/HF13031	-/-/-/-/-/-/-/-/-/-/-/-	12	5	HF10618/HF03202/HF13222/HF13223/HF02736	7	HF11865/HF42003/HF36175/HF18204/HF21270/HF03910/HF13031
MF	GO:0060089	molecular transducer activity	12/2710	56/16678	0.188883	0.792089	HF11865/HF42003/HF36175/HF10618/HF18204/HF03202/HF13222/HF21270/HF03910/HF13223/HF02736/HF13031	-/-/-/-/-/-/-/-/-/-/-/-	12	5	HF10618/HF03202/HF13222/HF13223/HF02736	7	HF11865/HF42003/HF36175/HF18204/HF21270/HF03910/HF13031
MF	GO:0046527	glucosyltransferase activity	19/2710	96/16678	0.2072	0.839726	HF00861/HF33666/HF29041/HF02157/HF29069/HF41998/HF07358/HF19048/HF16214/HF39841/HF31763/HF17210/HF17213/HF41760/HF41761/HF32116/HF29450/HF04907/HF02449	-/-/-/-/-/-/-/-/-/-/-/-/-/-/-/-/-/-/-	19	13	HF00861/HF33666/HF29041/HF02157/HF41998/HF07358/HF17210/HF17213/HF41760/HF41761/HF29450/HF04907/HF02449	6	HF29069/HF19048/HF16214/HF39841/HF31763/HF32116
MF	GO:0004571	mannosyl-oligosaccharide 1,2-alpha-mannosidase activity	3/2710	10/16678	0.213161	0.839726	HF41257/HF09162/HF09168	-/-/-	3	3	HF41257/HF09162/HF09168	0
MF	GO:0008131	primary amine oxidase activity	3/2710	10/16678	0.213161	0.839726	HF06541/HF09080/HF13903	-/-/-	3	0		3	HF06541/HF09080/HF13903
MF	GO:0015924	mannosyl-oligosaccharide mannosidase activity	3/2710	10/16678	0.213161	0.839726	HF41257/HF09162/HF09168	-/-/-	3	3	HF41257/HF09162/HF09168	0
MF	GO:0019900	kinase binding	3/2710	10/16678	0.213161	0.839726	HF25596/HF23801/HF14670	-/-/-	3	0		3	HF25596/HF23801/HF14670
MF	GO:0019901	protein kinase binding	3/2710	10/16678	0.213161	0.839726	HF25596/HF23801/HF14670	-/-/-	3	0		3	HF25596/HF23801/HF14670
MF	GO:0000287	magnesium ion binding	20/2710	103/16678	0.225416	0.879122	HF29432/HF43437/HF37198/HF27643/HF26148/HF41479/HF35913/HF34836/HF05622/HF03677/HF12196/HF08098/HF03428/HF37266/HF34430/HF29529/HF39375/HF22080/HF24894/HF29445	-/-/-/-/-/-/-/-/-/-/-/-/-/-/-/-/-/-/-/-	20	14	HF29432/HF43437/HF27643/HF34836/HF05622/HF03677/HF12196/HF08098/HF03428/HF34430/HF29529/HF22080/HF24894/HF29445	6	HF37198/HF26148/HF41479/HF35913/HF37266/HF39375
MF	GO:0016788	hydrolase activity, acting on ester bonds	85/2710	485/16678	0.236487	0.913169	HF19108/HF11966/HF18174/HF32072/HF10518/HF02090/HF31761/HF00545/HF06466/HF16731/HF30633/HF04884/novel.2210/HF08896/HF28279/HF04349/HF39067/novel.3422/HF32922/HF33784/HF42120/HF00950/HF41501/HF15830/novel.718/HF25316/HF25578/novel.2231/HF00367/novel.884/HF00959/HF09020/HF17700/HF36466/HF23736/HF41312/HF18834/HF33785/HF18504/HF28600/HF37062/HF12829/HF19280/HF18063/HF32136/HF17972/HF03399/HF07920/HF…	-/-/-/-/-/-/-/-/-/-/-/-/-/-/-/-/-/-/-/-/-/-/-/-/-/-/-/-/-/-/-/-/-/-/-/-/-/-/-/-/-/-/-/-/-/-/-/-/-/-/-/-/-/-/-/-/-/-/-/-/-/-/-/-/-/-/-/-/-/-/-/-/-/-/-/-/-/-/-/-/-/-/-/-/-	85	52	HF19108/HF11966/HF18174/HF10518/HF02090/HF04884/novel.2210/HF08896/HF04349/HF39067/HF32922/HF33784/HF00950/HF25578/novel.2231/HF00367/novel.884/HF00959/HF36466/HF41312/HF33785/HF18504/HF28600/HF37062/HF12829/HF17972/HF03399/HF07920/HF35994/HF28657/HF22365/HF37740/HF28207/HF12460/HF34047/HF07640/HF06053/novel.1645/novel.1598/HF00332/HF04505/HF17912/HF06270/HF43926/HF24555/HF00958/HF03489/HF25582/n…	33	HF32072/HF31761/HF00545/HF06466/HF16731/HF30633/HF28279/novel.3422/HF42120/HF41501/HF15830/novel.718/HF25316/HF09020/HF17700/HF23736/HF18834/HF19280/HF18063/HF32136/HF25660/HF33137/HF20150/HF41221/HF38043/HF08790/HF04510/HF14273/novel.719/HF02583/novel.811/HF30850/HF23779
MF	GO:0010181	FMN binding	8/2710	37/16678	0.24451	0.934891	HF17306/HF17326/HF17312/HF17307/HF25184/HF17308/HF17311/HF17305	-/-/-/-/-/-/-/-	8	2	HF17326/HF17305	6	HF17306/HF17312/HF17307/HF25184/HF17308/HF17311
MF	GO:0004499	N,N-dimethylaniline monooxygenase activity	5/2710	21/16678	0.247306	0.9364	HF10556/HF24802/HF02856/HF12889/HF24800	-/-/-/-/-	5	1	HF24802	4	HF10556/HF02856/HF12889/HF24800
MF	GO:0000990	transcription factor activity, core RNA polymerase binding	3/2710	11/16678	0.259901	0.956241	HF25943/HF26161/HF12967	-/-/-	3	0		3	HF25943/HF26161/HF12967
MF	GO:0000996	promoter selection factor activity	3/2710	11/16678	0.259901	0.956241	HF25943/HF26161/HF12967	-/-/-	3	0		3	HF25943/HF26161/HF12967
MF	GO:0016987	bacterial sigma factor activity	3/2710	11/16678	0.259901	0.956241	HF25943/HF26161/HF12967	-/-/-	3	0		3	HF25943/HF26161/HF12967
MF	GO:0016861	intramolecular oxidoreductase activity, interconverting aldoses and ketoses	5/2710	22/16678	0.280588	1	HF36776/HF34273/HF32330/HF25408/HF07846	-/-/-/-/-	5	0		5	HF36776/HF34273/HF32330/HF25408/HF07846
MF	GO:0071949	FAD binding	4/2710	17/16678	0.294117	1	HF31366/HF37388/HF03666/HF10457	-/-/-/-	4	1	HF03666	3	HF31366/HF37388/HF10457
MF	GO:0031406	carboxylic acid binding	6/2710	28/16678	0.297825	1	HF31826/HF29513/HF18349/HF42309/HF09926/HF07630	-/-/-/-/-/-	6	2	HF29513/HF18349	4	HF31826/HF42309/HF09926/HF07630
MF	GO:0043177	organic acid binding	6/2710	28/16678	0.297825	1	HF31826/HF29513/HF18349/HF42309/HF09926/HF07630	-/-/-/-/-/-	6	2	HF29513/HF18349	4	HF31826/HF42309/HF09926/HF07630
MF	GO:0042626	ATPase activity, coupled to transmembrane movement of substances	17/2710	91/16678	0.304286	1	HF20998/HF31989/HF28478/HF03359/HF43582/HF05696/HF42661/HF28481/HF04432/HF26339/HF02777/HF37328/HF26340/HF03364/HF31992/HF15622/HF37943	-/-/-/-/-/-/-/-/-/-/-/-/-/-/-/-/-	17	7	HF31989/HF03359/HF02777/HF37328/HF26340/HF15622/HF37943	10	HF20998/HF28478/HF43582/HF05696/HF42661/HF28481/HF04432/HF26339/HF03364/HF31992
MF	GO:0043492	ATPase activity, coupled to movement of substances	17/2710	91/16678	0.304286	1	HF20998/HF31989/HF28478/HF03359/HF43582/HF05696/HF42661/HF28481/HF04432/HF26339/HF02777/HF37328/HF26340/HF03364/HF31992/HF15622/HF37943	-/-/-/-/-/-/-/-/-/-/-/-/-/-/-/-/-	17	7	HF31989/HF03359/HF02777/HF37328/HF26340/HF15622/HF37943	10	HF20998/HF28478/HF43582/HF05696/HF42661/HF28481/HF04432/HF26339/HF03364/HF31992
MF	GO:0016641	oxidoreductase activity, acting on the CH-NH2 group of donors, oxygen as acceptor	3/2710	12/16678	0.30775	1	HF06541/HF09080/HF13903	-/-/-	3	0		3	HF06541/HF09080/HF13903
MF	GO:0042132	fructose 1,6-bisphosphate 1-phosphatase activity	3/2710	12/16678	0.30775	1	HF06466/HF25316/HF17972	-/-/-	3	1	HF17972	2	HF06466/HF25316
MF	GO:0016614	oxidoreductase activity, acting on CH-OH group of donors	35/2710	197/16678	0.308583	1	HF34283/HF38761/HF31540/HF38840/HF05786/HF36403/HF29995/HF09278/HF08005/HF37260/HF29955/HF05780/HF38953/HF29012/HF21247/HF26207/HF12527/HF12525/HF14770/HF23269/HF21079/HF14980/HF30727/HF23174/HF38285/HF22178/novel.1220/HF40292/HF22137/HF15072/HF16814/HF34282/HF05665/HF19218/HF00389	-/-/-/-/-/-/-/-/-/-/-/-/-/-/-/-/-/-/-/-/-/-/-/-/-/-/-/-/-/-/-/-/-/-/-	35	19	HF38761/HF31540/HF05786/HF29995/HF12527/HF12525/HF14770/HF23269/HF21079/HF14980/HF30727/HF38285/HF22178/novel.1220/HF40292/HF15072/HF34282/HF19218/HF00389	16	HF34283/HF38840/HF36403/HF09278/HF08005/HF37260/HF29955/HF05780/HF38953/HF29012/HF21247/HF26207/HF23174/HF22137/HF16814/HF05665
MF	GO:1901681	sulfur compound binding	5/2710	23/16678	0.314659	1	novel.1238/HF10167/HF43437/HF28414/HF43686	-/-/-/-/-	5	3	novel.1238/HF10167/HF43437	2	HF28414/HF43686
MF	GO:0016746	transferase activity, transferring acyl groups	53/2710	305/16678	0.317771	1	HF21620/HF29885/HF07750/HF15733/HF18078/HF13151/HF33484/HF37648/HF33891/HF32495/HF29878/HF30930/HF37654/HF34498/HF19136/HF35196/HF17436/HF31589/HF24500/HF06721/HF13670/HF27731/HF15846/HF38352/HF42282/HF13940/HF14890/HF29223/HF03389/HF01451/HF21248/HF07118/HF00821/HF00824/HF10164/HF11292/HF21966/HF41513/HF31385/HF35199/HF27404/HF04674/HF42768/HF09044/novel.217/HF06051/HF13429/HF32368/HF23663/HF145…	-/-/-/-/-/-/-/-/-/-/-/-/-/-/-/-/-/-/-/-/-/-/-/-/-/-/-/-/-/-/-/-/-/-/-/-/-/-/-/-/-/-/-/-/-/-/-/-/-/-/-/-/-	53	29	HF07750/HF29878/HF37654/HF34498/HF35196/HF17436/HF24500/HF27731/HF15846/HF38352/HF13940/HF14890/HF29223/HF03389/HF01451/HF21248/HF07118/HF00821/HF00824/HF10164/HF11292/HF21966/HF41513/HF27404/HF42768/HF09044/HF32368/HF24195/HF37128	24	HF21620/HF29885/HF15733/HF18078/HF13151/HF33484/HF37648/HF33891/HF32495/HF30930/HF19136/HF31589/HF06721/HF13670/HF42282/HF31385/HF35199/HF04674/novel.217/HF06051/HF13429/HF23663/HF14520/HF29623
MF	GO:0004871	signal transducer activity	16/2710	86/16678	0.318106	1	HF21442/HF11865/HF42003/HF36175/HF10618/HF18204/HF03202/HF13222/HF21270/HF03910/HF21935/HF13223/HF28327/HF02736/HF13999/HF13031	-/-/-/-/-/-/-/-/-/-/-/-/-/-/-/-	16	7	HF21442/HF10618/HF03202/HF13222/HF13223/HF02736/HF13999	9	HF11865/HF42003/HF36175/HF18204/HF21270/HF03910/HF21935/HF28327/HF13031
MF	GO:0015399	primary active transmembrane transporter activity	18/2710	98/16678	0.3237	1	HF20998/HF31989/HF28478/HF03359/HF43582/HF05696/HF42661/HF28481/HF15791/HF04432/HF26339/HF02777/HF37328/HF26340/HF03364/HF31992/HF15622/HF37943	-/-/-/-/-/-/-/-/-/-/-/-/-/-/-/-/-/-	18	8	HF31989/HF03359/HF15791/HF02777/HF37328/HF26340/HF15622/HF37943	10	HF20998/HF28478/HF43582/HF05696/HF42661/HF28481/HF04432/HF26339/HF03364/HF31992
MF	GO:0015405	P-P-bond-hydrolysis-driven transmembrane transporter activity	18/2710	98/16678	0.3237	1	HF20998/HF31989/HF28478/HF03359/HF43582/HF05696/HF42661/HF28481/HF15791/HF04432/HF26339/HF02777/HF37328/HF26340/HF03364/HF31992/HF15622/HF37943	-/-/-/-/-/-/-/-/-/-/-/-/-/-/-/-/-/-	18	8	HF31989/HF03359/HF15791/HF02777/HF37328/HF26340/HF15622/HF37943	10	HF20998/HF28478/HF43582/HF05696/HF42661/HF28481/HF04432/HF26339/HF03364/HF31992
MF	GO:0004427	inorganic diphosphatase activity	4/2710	18/16678	0.333733	1	HF15791/HF27643/HF05622/HF24894	-/-/-/-	4	4	HF15791/HF27643/HF05622/HF24894	0
MF	GO:0019203	carbohydrate phosphatase activity	4/2710	18/16678	0.333733	1	HF06466/HF25316/novel.884/HF17972	-/-/-/-	4	2	novel.884/HF17972	2	HF06466/HF25316
MF	GO:0050308	sugar-phosphatase activity	4/2710	18/16678	0.333733	1	HF06466/HF25316/novel.884/HF17972	-/-/-/-	4	2	novel.884/HF17972	2	HF06466/HF25316
MF	GO:0042623	ATPase activity, coupled	23/2710	129/16678	0.347742	1	HF09309/HF20998/HF31989/HF24813/HF28478/HF03359/HF14203/HF43582/HF05696/HF42661/HF28481/HF14176/HF04432/HF26339/HF02777/HF37328/HF26340/HF28270/HF03364/HF31992/HF15622/HF16835/HF37943	-/-/-/-/-/-/-/-/-/-/-/-/-/-/-/-/-/-/-/-/-/-/-	23	10	HF31989/HF03359/HF14203/HF02777/HF37328/HF26340/HF28270/HF15622/HF16835/HF37943	13	HF09309/HF20998/HF24813/HF28478/HF43582/HF05696/HF42661/HF28481/HF14176/HF04432/HF26339/HF03364/HF31992
MF	GO:0004506	squalene monooxygenase activity	3/2710	13/16678	0.355842	1	HF10346/HF10349/HF10347	-/-/-	3	0		3	HF10346/HF10349/HF10347
MF	GO:0004568	chitinase activity	3/2710	13/16678	0.355842	1	HF19224/HF31571/HF00954	-/-/-	3	1	HF00954	2	HF19224/HF31571
MF	GO:0016811	hydrolase activity, acting on carbon-nitrogen (but not peptide) bonds, in linear amides	3/2710	13/16678	0.355842	1	HF06210/HF27335/HF40472	-/-/-	3	1	HF27335	2	HF06210/HF40472
MF	GO:0000988	transcription factor activity, protein binding	12/2710	65/16678	0.363299	1	HF25943/HF39863/HF11725/HF26161/HF39866/HF23815/HF39869/HF25708/HF20528/HF12967/HF09044/HF24374	-/-/-/-/-/-/-/-/-/-/-/-	12	5	HF11725/HF23815/HF39869/HF09044/HF24374	7	HF25943/HF39863/HF26161/HF39866/HF25708/HF20528/HF12967
MF	GO:0008238	exopeptidase activity	13/2710	71/16678	0.365875	1	HF41921/HF25024/HF08133/HF08055/HF08144/HF20959/HF21709/HF42860/HF06899/HF16798/HF31608/HF38067/HF07877	-/-/-/-/-/-/-/-/-/-/-/-/-	13	5	HF41921/HF25024/HF08055/HF20959/HF42860	8	HF08133/HF08144/HF21709/HF06899/HF16798/HF31608/HF38067/HF07877
MF	GO:0016831	carboxy-lyase activity	9/2710	48/16678	0.376446	1	HF07624/HF32087/HF42711/HF39239/HF42272/HF15125/HF26149/HF42246/HF08006	-/-/-/-/-/-/-/-/-	9	4	HF42711/HF39239/HF15125/HF42246	5	HF07624/HF32087/HF42272/HF26149/HF08006
MF	GO:0016597	amino acid binding	5/2710	25/16678	0.383927	1	HF31826/HF18349/HF42309/HF09926/HF07630	-/-/-/-/-	5	1	HF18349	4	HF31826/HF42309/HF09926/HF07630
MF	GO:0008509	anion transmembrane transporter activity	12/2710	66/16678	0.384386	1	HF36070/HF23371/HF10694/HF32710/HF23029/HF39007/HF34519/HF10670/HF10686/HF17231/HF34001/HF30353	-/-/-/-/-/-/-/-/-/-/-/-	12	9	HF36070/HF23371/HF10694/HF23029/HF39007/HF34519/HF10670/HF10686/HF34001	3	HF32710/HF17231/HF30353
MF	GO:0003729	mRNA binding	3/2710	14/16678	0.403446	1	novel.1238/HF18961/novel.2176	-/-/-	3	1	novel.1238	2	HF18961/novel.2176
MF	GO:0004045	aminoacyl-tRNA hydrolase activity	3/2710	14/16678	0.403446	1	novel.2231/HF12829/HF43926	-/-/-	3	3	novel.2231/HF12829/HF43926	0
MF	GO:0004602	glutathione peroxidase activity	3/2710	14/16678	0.403446	1	novel.732/HF21303/HF20770	-/-/-	3	1	HF20770	2	novel.732/HF21303
MF	GO:0016717	oxidoreductase activity, acting on paired donors, with oxidation of a pair of donors resulting in the reduction of molecular oxygen to two molecules of water	3/2710	14/16678	0.403446	1	HF23957/HF25408/HF40113	-/-/-	3	0		3	HF23957/HF25408/HF40113
MF	GO:0016872	intramolecular lyase activity	3/2710	14/16678	0.403446	1	HF23861/HF25114/novel.157	-/-/-	3	0		3	HF23861/HF25114/novel.157
MF	GO:0008443	phosphofructokinase activity	4/2710	20/16678	0.413153	1	HF12314/novel.2730/HF28596/HF28597	-/-/-/-	4	1	HF12314	3	novel.2730/HF28596/HF28597
MF	GO:0019200	carbohydrate kinase activity	4/2710	20/16678	0.413153	1	HF12314/novel.2730/HF28596/HF28597	-/-/-/-	4	1	HF12314	3	novel.2730/HF28596/HF28597
MF	GO:0016860	intramolecular oxidoreductase activity	5/2710	26/16678	0.418549	1	HF36776/HF34273/HF32330/HF25408/HF07846	-/-/-/-/-	5	0		5	HF36776/HF34273/HF32330/HF25408/HF07846
MF	GO:0019842	vitamin binding	17/2710	99/16678	0.443127	1	HF28915/HF32404/HF42672/novel.1238/HF23027/HF15559/HF43437/HF03224/HF29513/HF15125/HF28414/HF34500/HF14845/HF27275/HF08006/HF43686/HF32403	-/-/-/-/-/-/-/-/-/-/-/-/-/-/-/-/-	17	11	HF28915/novel.1238/HF23027/HF15559/HF43437/HF29513/HF15125/HF34500/HF14845/HF27275/HF32403	6	HF32404/HF42672/HF03224/HF28414/HF08006/HF43686
MF	GO:0003916	DNA topoisomerase activity	3/2710	15/16678	0.449962	1	HF14176/HF21878/HF16835	-/-/-	3	1	HF16835	2	HF14176/HF21878
MF	GO:0005088	Ras guanyl-nucleotide exchange factor activity	3/2710	15/16678	0.449962	1	HF14901/HF20960/HF00225	-/-/-	3	0		3	HF14901/HF20960/HF00225
MF	GO:0005089	Rho guanyl-nucleotide exchange factor activity	3/2710	15/16678	0.449962	1	HF14901/HF20960/HF00225	-/-/-	3	0		3	HF14901/HF20960/HF00225
MF	GO:0016671	oxidoreductase activity, acting on a sulfur group of donors, disulfide as acceptor	3/2710	15/16678	0.449962	1	novel.1289/novel.1397/HF41420	-/-/-	3	3	novel.1289/novel.1397/HF41420	0
MF	GO:0017048	Rho GTPase binding	3/2710	15/16678	0.449962	1	HF14901/HF20960/HF00225	-/-/-	3	0		3	HF14901/HF20960/HF00225
MF	GO:0019829	cation-transporting ATPase activity	4/2710	21/16678	0.452176	1	HF05696/HF37328/HF15622/HF37943	-/-/-/-	4	3	HF37328/HF15622/HF37943	1	HF05696
MF	GO:0022853	active ion transmembrane transporter activity	4/2710	21/16678	0.452176	1	HF05696/HF37328/HF15622/HF37943	-/-/-/-	4	3	HF37328/HF15622/HF37943	1	HF05696
MF	GO:0042625	ATPase coupled ion transmembrane transporter activity	4/2710	21/16678	0.452176	1	HF05696/HF37328/HF15622/HF37943	-/-/-/-	4	3	HF37328/HF15622/HF37943	1	HF05696
MF	GO:0044769	ATPase activity, coupled to transmembrane movement of ions, rotational mechanism	4/2710	21/16678	0.452176	1	HF05696/HF37328/HF15622/HF37943	-/-/-/-	4	3	HF37328/HF15622/HF37943	1	HF05696
MF	GO:0016651	oxidoreductase activity, acting on NAD(P)H	7/2710	39/16678	0.452285	1	HF08509/HF19073/HF39961/HF30845/HF42906/HF07045/HF22508	-/-/-/-/-/-/-	7	4	HF08509/HF42906/HF07045/HF22508	3	HF19073/HF39961/HF30845
MF	GO:0008168	methyltransferase activity	52/2710	315/16678	0.473941	1	HF21135/novel.3247/HF15239/HF06854/HF43161/novel.3465/HF13474/HF11685/novel.184/HF23992/HF24372/HF02761/HF41650/HF11072/HF24563/HF08782/HF27687/HF44210/HF25112/HF26074/HF28446/HF33550/novel.146/HF34799/HF41713/HF05120/HF23341/HF41212/novel.2170/HF34547/HF12005/HF36787/HF33556/HF10512/HF10508/HF26371/HF24543/HF31108/HF05636/HF18869/HF11260/HF03024/HF38191/HF05629/HF34050/HF05628/HF11321/HF26691/HF…	-/-/-/-/-/-/-/-/-/-/-/-/-/-/-/-/-/-/-/-/-/-/-/-/-/-/-/-/-/-/-/-/-/-/-/-/-/-/-/-/-/-/-/-/-/-/-/-/-/-/-/-	52	36	HF15239/novel.3465/HF11685/novel.184/HF23992/HF24372/HF41650/HF11072/HF24563/HF08782/HF27687/HF44210/HF25112/HF28446/HF33550/novel.146/HF34799/HF05120/HF23341/HF41212/novel.2170/HF34547/HF12005/HF33556/HF26371/HF24543/HF31108/HF11260/HF38191/HF05629/HF34050/HF05628/HF11321/HF05121/HF07960/HF19729	16	HF21135/novel.3247/HF06854/HF43161/HF13474/HF02761/HF26074/HF41713/HF36787/HF10512/HF10508/HF05636/HF18869/HF03024/HF26691/HF04258
MF	GO:0016759	cellulose synthase activity	6/2710	34/16678	0.483254	1	HF19048/HF39841/HF17210/HF17213/HF41760/HF41761	-/-/-/-/-/-	6	4	HF17210/HF17213/HF41760/HF41761	2	HF19048/HF39841
MF	GO:0016760	cellulose synthase (UDP-forming) activity	6/2710	34/16678	0.483254	1	HF19048/HF39841/HF17210/HF17213/HF41760/HF41761	-/-/-/-/-/-	6	4	HF17210/HF17213/HF41760/HF41761	2	HF19048/HF39841
MF	GO:0003746	translation elongation factor activity	4/2710	22/16678	0.490306	1	HF10179/HF06683/HF14472/HF10183	-/-/-/-	4	3	HF10179/HF06683/HF10183	1	HF14472
MF	GO:0008237	metallopeptidase activity	11/2710	65/16678	0.493096	1	HF06373/HF20945/HF13661/HF25700/HF33481/HF32192/HF12789/HF33722/HF05567/HF33184/HF24923	-/-/-/-/-/-/-/-/-/-/-	11	3	HF25700/HF12789/HF33184	8	HF06373/HF20945/HF13661/HF33481/HF32192/HF33722/HF05567/HF24923
MF	GO:0046982	protein heterodimerization activity	18/2710	108/16678	0.493412	1	HF40361/HF44438/HF25170/HF11588/HF40360/HF38231/HF28869/HF33799/HF28339/HF33878/HF39803/HF18053/HF32285/HF04456/HF41656/HF32695/HF06084/HF43767	-/-/-/-/-/-/-/-/-/-/-/-/-/-/-/-/-/-	18	12	HF40361/HF25170/HF11588/HF40360/HF33799/HF28339/HF39803/HF18053/HF32285/HF41656/HF06084/HF43767	6	HF44438/HF38231/HF28869/HF33878/HF04456/HF32695
MF	GO:0016799	hydrolase activity, hydrolyzing N-glycosyl compounds	3/2710	16/16678	0.494915	1	HF08433/HF21626/HF08436	-/-/-	3	1	HF21626	2	HF08433/HF08436
MF	GO:0036442	proton-exporting ATPase activity	3/2710	16/16678	0.494915	1	HF37328/HF15622/HF37943	-/-/-	3	3	HF37328/HF15622/HF37943	0
MF	GO:0046961	proton-transporting ATPase activity, rotational mechanism	3/2710	16/16678	0.494915	1	HF37328/HF15622/HF37943	-/-/-	3	3	HF37328/HF15622/HF37943	0
MF	GO:0030234	enzyme regulator activity	29/2710	176/16678	0.498971	1	HF19108/HF38047/HF11725/HF42043/HF40614/novel.3351/HF03443/HF23728/HF16677/HF00950/HF23730/HF15830/HF03088/novel.718/HF04741/HF06818/HF37561/HF23736/HF07920/HF25660/HF05895/HF01867/HF40706/novel.719/novel.3301/HF26438/HF00958/HF38050/HF29692	-/-/-/-/-/-/-/-/-/-/-/-/-/-/-/-/-/-/-/-/-/-/-/-/-/-/-/-/-	29	15	HF19108/HF11725/HF40614/novel.3351/HF23728/HF00950/HF23730/HF06818/HF37561/HF07920/HF05895/novel.3301/HF00958/HF38050/HF29692	14	HF38047/HF42043/HF03443/HF16677/HF15830/HF03088/novel.718/HF04741/HF23736/HF25660/HF01867/HF40706/novel.719/HF26438
MF	GO:0003968	RNA-directed 5'-3' RNA polymerase activity	2/2710	10/16678	0.500852	1	novel.1550/HF07959	-/-	2	1	HF07959	1	novel.1550
MF	GO:0004332	fructose-bisphosphate aldolase activity	2/2710	10/16678	0.500852	1	HF42124/HF06019	-/-	2	2	HF42124/HF06019	0
MF	GO:0016624	oxidoreductase activity, acting on the aldehyde or oxo group of donors, disulfide as acceptor	2/2710	10/16678	0.500852	1	HF06761/HF06762	-/-	2	1	HF06762	1	HF06761
MF	GO:0016854	racemase and epimerase activity	2/2710	10/16678	0.500852	1	HF39002/HF14442	-/-	2	2	HF39002/HF14442	0
MF	GO:0060590	ATPase regulator activity	2/2710	10/16678	0.500852	1	novel.3351/HF03443	-/-	2	1	novel.3351	1	HF03443
MF	GO:0000989	transcription factor activity, transcription factor binding	9/2710	54/16678	0.523736	1	HF39863/HF11725/HF39866/HF23815/HF39869/HF25708/HF20528/HF09044/HF24374	-/-/-/-/-/-/-/-/-	9	5	HF11725/HF23815/HF39869/HF09044/HF24374	4	HF39863/HF39866/HF25708/HF20528
MF	GO:0003712	transcription cofactor activity	9/2710	54/16678	0.523736	1	HF39863/HF11725/HF39866/HF23815/HF39869/HF25708/HF20528/HF09044/HF24374	-/-/-/-/-/-/-/-/-	9	5	HF11725/HF23815/HF39869/HF09044/HF24374	4	HF39863/HF39866/HF25708/HF20528
MF	GO:0015298	solute:cation antiporter activity	9/2710	54/16678	0.523736	1	HF43202/HF15920/HF25447/HF20883/HF28356/HF27944/HF08541/HF06794/HF26664	-/-/-/-/-/-/-/-/-	9	4	HF15920/HF25447/HF27944/HF08541	5	HF43202/HF20883/HF28356/HF06794/HF26664
MF	GO:0015299	solute:proton antiporter activity	9/2710	54/16678	0.523736	1	HF43202/HF15920/HF25447/HF20883/HF28356/HF27944/HF08541/HF06794/HF26664	-/-/-/-/-/-/-/-/-	9	4	HF15920/HF25447/HF27944/HF08541	5	HF43202/HF20883/HF28356/HF06794/HF26664
MF	GO:0004842	ubiquitin-protein transferase activity	19/2710	116/16678	0.523902	1	HF26036/HF01818/HF22631/HF22234/HF41158/HF42005/HF15708/HF07357/HF18154/HF35547/HF12808/HF09147/HF32203/HF36171/HF42084/HF20925/HF17856/HF31919/HF42296	-/-/-/-/-/-/-/-/-/-/-/-/-/-/-/-/-/-/-	19	6	HF15708/HF35547/HF36171/HF20925/HF17856/HF42296	13	HF26036/HF01818/HF22631/HF22234/HF41158/HF42005/HF07357/HF18154/HF12808/HF09147/HF32203/HF42084/HF31919
MF	GO:0019787	ubiquitin-like protein transferase activity	19/2710	116/16678	0.523902	1	HF26036/HF01818/HF22631/HF22234/HF41158/HF42005/HF15708/HF07357/HF18154/HF35547/HF12808/HF09147/HF32203/HF36171/HF42084/HF20925/HF17856/HF31919/HF42296	-/-/-/-/-/-/-/-/-/-/-/-/-/-/-/-/-/-/-	19	6	HF15708/HF35547/HF36171/HF20925/HF17856/HF42296	13	HF26036/HF01818/HF22631/HF22234/HF41158/HF42005/HF07357/HF18154/HF12808/HF09147/HF32203/HF42084/HF31919
MF	GO:0051087	chaperone binding	4/2710	23/16678	0.527285	1	novel.3351/HF03443/HF10252/HF42825	-/-/-/-	4	2	novel.3351/HF10252	2	HF03443/HF42825
MF	GO:0003872	6-phosphofructokinase activity	3/2710	17/16678	0.537943	1	HF12314/HF28596/HF28597	-/-/-	3	1	HF12314	2	HF28596/HF28597
MF	GO:0004559	alpha-mannosidase activity	3/2710	17/16678	0.537943	1	HF41257/HF09162/HF09168	-/-/-	3	3	HF41257/HF09162/HF09168	0
MF	GO:0016638	oxidoreductase activity, acting on the CH-NH2 group of donors	3/2710	17/16678	0.537943	1	HF06541/HF09080/HF13903	-/-/-	3	0		3	HF06541/HF09080/HF13903
MF	GO:0003993	acid phosphatase activity	5/2710	30/16678	0.551422	1	HF02090/HF41501/HF36466/HF18504/HF22365	-/-/-/-/-	5	4	HF02090/HF36466/HF18504/HF22365	1	HF41501
MF	GO:0016765	transferase activity, transferring alkyl or aryl (other than methyl) groups	8/2710	49/16678	0.553998	1	HF17127/HF34596/HF44388/HF17133/HF40154/HF40942/HF22816/HF03172	-/-/-/-/-/-/-/-	8	4	HF34596/HF44388/HF40154/HF22816	4	HF17127/HF17133/HF40942/HF03172
MF	GO:0003918	DNA topoisomerase type II (ATP-hydrolyzing) activity	2/2710	11/16678	0.554397	1	HF14176/HF16835	-/-	2	1	HF16835	1	HF14176
MF	GO:0004003	ATP-dependent DNA helicase activity	2/2710	11/16678	0.554397	1	HF14203/HF28270	-/-	2	2	HF14203/HF28270	0
MF	GO:0004784	superoxide dismutase activity	2/2710	11/16678	0.554397	1	novel.3281/HF03587	-/-	2	1	novel.3281	1	HF03587
MF	GO:0005351	carbohydrate:proton symporter activity	2/2710	11/16678	0.554397	1	HF41837/HF10626	-/-	2	2	HF41837/HF10626	0
MF	GO:0005402	carbohydrate:cation symporter activity	2/2710	11/16678	0.554397	1	HF41837/HF10626	-/-	2	2	HF41837/HF10626	0
MF	GO:0008026	ATP-dependent helicase activity	2/2710	11/16678	0.554397	1	HF14203/HF28270	-/-	2	2	HF14203/HF28270	0
MF	GO:0008519	ammonium transmembrane transporter activity	2/2710	11/16678	0.554397	1	HF30133/HF19491	-/-	2	2	HF30133/HF19491	0
MF	GO:0015144	carbohydrate transmembrane transporter activity	2/2710	11/16678	0.554397	1	HF41837/HF10626	-/-	2	2	HF41837/HF10626	0
MF	GO:0015293	symporter activity	2/2710	11/16678	0.554397	1	HF41837/HF10626	-/-	2	2	HF41837/HF10626	0
MF	GO:0015294	solute:cation symporter activity	2/2710	11/16678	0.554397	1	HF41837/HF10626	-/-	2	2	HF41837/HF10626	0
MF	GO:0015295	solute:proton symporter activity	2/2710	11/16678	0.554397	1	HF41837/HF10626	-/-	2	2	HF41837/HF10626	0
MF	GO:0016668	oxidoreductase activity, acting on a sulfur group of donors, NAD(P) as acceptor	2/2710	11/16678	0.554397	1	HF07045/HF22508	-/-	2	2	HF07045/HF22508	0
MF	GO:0016721	oxidoreductase activity, acting on superoxide radicals as acceptor	2/2710	11/16678	0.554397	1	novel.3281/HF03587	-/-	2	1	novel.3281	1	HF03587
MF	GO:0016881	acid-amino acid ligase activity	2/2710	11/16678	0.554397	1	HF08410/HF15923	-/-	2	1	HF08410	1	HF15923
MF	GO:0047134	protein-disulfide reductase activity	2/2710	11/16678	0.554397	1	HF07045/HF22508	-/-	2	2	HF07045/HF22508	0
MF	GO:0061505	DNA topoisomerase II activity	2/2710	11/16678	0.554397	1	HF14176/HF16835	-/-	2	1	HF16835	1	HF14176
MF	GO:0070035	purine NTP-dependent helicase activity	2/2710	11/16678	0.554397	1	HF14203/HF28270	-/-	2	2	HF14203/HF28270	0
MF	GO:0098772	molecular function regulator	34/2710	212/16678	0.562561	1	HF19108/HF38047/HF11725/HF42043/HF14901/HF40614/novel.3351/HF03443/HF23728/HF16677/HF00950/HF23730/HF15830/HF03088/novel.718/HF04741/HF06818/HF37561/HF23736/HF07920/HF25660/HF05895/HF01867/HF40706/HF08114/HF18728/novel.719/novel.3301/HF26438/HF00958/HF20960/HF38050/HF00225/HF29692	-/-/-/-/-/-/-/-/-/-/-/-/-/-/-/-/-/-/-/-/-/-/-/-/-/-/-/-/-/-/-/-/-/-	34	16	HF19108/HF11725/HF40614/novel.3351/HF23728/HF00950/HF23730/HF06818/HF37561/HF07920/HF05895/HF18728/novel.3301/HF00958/HF38050/HF29692	18	HF38047/HF42043/HF14901/HF03443/HF16677/HF15830/HF03088/novel.718/HF04741/HF23736/HF25660/HF01867/HF40706/HF08114/novel.719/HF26438/HF20960/HF00225
MF	GO:0042578	phosphoric ester hydrolase activity	24/2710	150/16678	0.567572	1	HF18174/HF02090/HF31761/HF06466/novel.2210/HF28279/HF39067/HF32922/HF41501/HF25316/HF00367/novel.884/HF36466/HF18504/HF37062/HF17972/HF03399/HF35994/HF28657/HF22365/HF37740/HF41221/HF08790/HF02583	-/-/-/-/-/-/-/-/-/-/-/-/-/-/-/-/-/-/-/-/-/-/-/-	24	16	HF18174/HF02090/novel.2210/HF39067/HF32922/HF00367/novel.884/HF36466/HF18504/HF37062/HF17972/HF03399/HF35994/HF28657/HF22365/HF37740	8	HF31761/HF06466/HF28279/HF41501/HF25316/HF41221/HF08790/HF02583
MF	GO:0015923	mannosidase activity	3/2710	18/16678	0.578785	1	HF41257/HF09162/HF09168	-/-/-	3	3	HF41257/HF09162/HF09168	0
MF	GO:0017089	glycolipid transporter activity	3/2710	18/16678	0.578785	1	HF09856/HF09911/HF11951	-/-/-	3	1	HF09856	2	HF09911/HF11951
MF	GO:0051861	glycolipid binding	3/2710	18/16678	0.578785	1	HF09856/HF09911/HF11951	-/-/-	3	1	HF09856	2	HF09911/HF11951
MF	GO:0016741	transferase activity, transferring one-carbon groups	52/2710	326/16678	0.582151	1	HF21135/novel.3247/HF15239/HF06854/HF43161/novel.3465/HF13474/HF11685/novel.184/HF23992/HF24372/HF02761/HF41650/HF11072/HF24563/HF08782/HF27687/HF44210/HF25112/HF26074/HF28446/HF33550/novel.146/HF34799/HF41713/HF05120/HF23341/HF41212/novel.2170/HF34547/HF12005/HF36787/HF33556/HF10512/HF10508/HF26371/HF24543/HF31108/HF05636/HF18869/HF11260/HF03024/HF38191/HF05629/HF34050/HF05628/HF11321/HF26691/HF…	-/-/-/-/-/-/-/-/-/-/-/-/-/-/-/-/-/-/-/-/-/-/-/-/-/-/-/-/-/-/-/-/-/-/-/-/-/-/-/-/-/-/-/-/-/-/-/-/-/-/-/-	52	36	HF15239/novel.3465/HF11685/novel.184/HF23992/HF24372/HF41650/HF11072/HF24563/HF08782/HF27687/HF44210/HF25112/HF28446/HF33550/novel.146/HF34799/HF05120/HF23341/HF41212/novel.2170/HF34547/HF12005/HF33556/HF26371/HF24543/HF31108/HF11260/HF38191/HF05629/HF34050/HF05628/HF11321/HF05121/HF07960/HF19729	16	HF21135/novel.3247/HF06854/HF43161/HF13474/HF02761/HF26074/HF41713/HF36787/HF10512/HF10508/HF05636/HF18869/HF03024/HF26691/HF04258
MF	GO:0008236	serine-type peptidase activity	27/2710	170/16678	0.584188	1	HF41921/HF25024/HF21630/HF08133/HF11750/HF41663/HF08055/HF29588/HF18181/HF08144/HF20959/HF40628/HF21709/novel.1856/novel.1935/HF42860/HF21714/HF06899/HF16798/HF25262/HF20406/HF18695/HF31608/HF06213/HF07877/HF40234/HF27222	-/-/-/-/-/-/-/-/-/-/-/-/-/-/-/-/-/-/-/-/-/-/-/-/-/-/-	27	13	HF41921/HF25024/HF21630/HF41663/HF08055/HF29588/HF18181/HF20959/HF40628/HF42860/HF21714/HF18695/HF40234	14	HF08133/HF11750/HF08144/HF21709/novel.1856/novel.1935/HF06899/HF16798/HF25262/HF20406/HF31608/HF06213/HF07877/HF27222
MF	GO:0017171	serine hydrolase activity	27/2710	170/16678	0.584188	1	HF41921/HF25024/HF21630/HF08133/HF11750/HF41663/HF08055/HF29588/HF18181/HF08144/HF20959/HF40628/HF21709/novel.1856/novel.1935/HF42860/HF21714/HF06899/HF16798/HF25262/HF20406/HF18695/HF31608/HF06213/HF07877/HF40234/HF27222	-/-/-/-/-/-/-/-/-/-/-/-/-/-/-/-/-/-/-/-/-/-/-/-/-/-/-	27	13	HF41921/HF25024/HF21630/HF41663/HF08055/HF29588/HF18181/HF20959/HF40628/HF42860/HF21714/HF18695/HF40234	14	HF08133/HF11750/HF08144/HF21709/novel.1856/novel.1935/HF06899/HF16798/HF25262/HF20406/HF31608/HF06213/HF07877/HF27222
MF	GO:0005085	guanyl-nucleotide exchange factor activity	4/2710	25/16678	0.596991	1	HF14901/HF18728/HF20960/HF00225	-/-/-/-	4	1	HF18728	3	HF14901/HF20960/HF00225
MF	GO:0008094	DNA-dependent ATPase activity	4/2710	25/16678	0.596991	1	HF14203/HF14176/HF28270/HF16835	-/-/-/-	4	3	HF14203/HF28270/HF16835	1	HF14176
MF	GO:0015075	ion transmembrane transporter activity	63/2710	397/16678	0.60364	1	HF32197/HF38080/HF18741/HF36070/HF24477/HF43202/HF23371/HF05696/HF10618/HF15920/HF10694/HF32710/HF39705/HF25447/HF09599/HF05645/HF09568/HF20883/HF30133/HF31536/HF23029/HF11571/HF39007/HF12553/HF03202/HF42895/HF37328/HF23038/HF38621/HF28356/HF33978/HF13222/HF21270/HF23063/HF41837/HF03910/HF34519/HF40539/HF40223/HF13223/HF27944/HF19491/HF08541/HF15622/HF06794/HF26009/HF02610/HF10670/HF23399/HF24211…	-/-/-/-/-/-/-/-/-/-/-/-/-/-/-/-/-/-/-/-/-/-/-/-/-/-/-/-/-/-/-/-/-/-/-/-/-/-/-/-/-/-/-/-/-/-/-/-/-/-/-/-/-/-/-/-/-/-/-/-/-/-/-	63	36	HF36070/HF24477/HF23371/HF10618/HF15920/HF10694/HF25447/HF09599/HF30133/HF31536/HF23029/HF39007/HF03202/HF42895/HF37328/HF23038/HF33978/HF13222/HF23063/HF41837/HF34519/HF13223/HF27944/HF19491/HF08541/HF15622/HF10670/HF23399/HF24211/HF37943/HF12755/HF10686/HF04181/HF34001/HF11939/HF10626	27	HF32197/HF38080/HF18741/HF43202/HF05696/HF32710/HF39705/HF05645/HF09568/HF20883/HF11571/HF12553/HF38621/HF28356/HF21270/HF03910/HF40539/HF40223/HF06794/HF26009/HF02610/HF17231/HF24277/HF30353/HF21230/HF13031/HF26664
MF	GO:0004367	glycerol-3-phosphate dehydrogenase [NAD+] activity	2/2710	12/16678	0.603726	1	HF38953/HF14980	-/-	2	1	HF14980	1	HF38953
MF	GO:0015932	nucleobase-containing compound transmembrane transporter activity	2/2710	12/16678	0.603726	1	HF29483/HF32710	-/-	2	1	HF29483	1	HF32710
MF	GO:0019139	cytokinin dehydrogenase activity	2/2710	12/16678	0.603726	1	HF21079/HF30727	-/-	2	2	HF21079/HF30727	0
MF	GO:1901505	carbohydrate derivative transmembrane transporter activity	2/2710	12/16678	0.603726	1	HF29483/HF32710	-/-	2	1	HF29483	1	HF32710
MF	GO:0016791	phosphatase activity	15/2710	98/16678	0.642216	1	HF02090/HF06466/HF28279/HF41501/HF25316/HF00367/novel.884/HF36466/HF18504/HF37062/HF17972/HF28657/HF22365/HF41221/HF02583	-/-/-/-/-/-/-/-/-/-/-/-/-/-/-	15	9	HF02090/HF00367/novel.884/HF36466/HF18504/HF37062/HF17972/HF28657/HF22365	6	HF06466/HF28279/HF41501/HF25316/HF41221/HF02583
MF	GO:0004176	ATP-dependent peptidase activity	2/2710	13/16678	0.648796	1	HF09309/HF24813	-/-	2	0		2	HF09309/HF24813
MF	GO:0016832	aldehyde-lyase activity	2/2710	13/16678	0.648796	1	HF42124/HF06019	-/-	2	2	HF42124/HF06019	0
MF	GO:0070566	adenylyltransferase activity	2/2710	13/16678	0.648796	1	HF01798/HF41914	-/-	2	0		2	HF01798/HF41914
MF	GO:0003678	DNA helicase activity	3/2710	20/16678	0.653287	1	novel.3057/HF14203/HF28270	-/-/-	3	3	novel.3057/HF14203/HF28270	0
MF	GO:0051537	2 iron, 2 sulfur cluster binding	3/2710	20/16678	0.653287	1	HF21287/HF13329/HF39655	-/-/-	3	2	HF21287/HF39655	1	HF13329
MF	GO:0016810	hydrolase activity, acting on carbon-nitrogen (but not peptide) bonds	7/2710	47/16678	0.660122	1	HF06210/HF27335/HF40465/HF16661/HF40472/HF05884/HF35236	-/-/-/-/-/-/-	7	3	HF27335/HF16661/HF35236	4	HF06210/HF40465/HF40472/HF05884
MF	GO:0000155	phosphorelay sensor kinase activity	4/2710	27/16678	0.66015	1	HF11865/HF42003/HF18204/HF02736	-/-/-/-	4	1	HF02736	3	HF11865/HF42003/HF18204
MF	GO:0004673	protein histidine kinase activity	4/2710	27/16678	0.66015	1	HF11865/HF42003/HF18204/HF02736	-/-/-/-	4	1	HF02736	3	HF11865/HF42003/HF18204
MF	GO:0016775	phosphotransferase activity, nitrogenous group as acceptor	4/2710	27/16678	0.66015	1	HF11865/HF42003/HF18204/HF02736	-/-/-/-	4	1	HF02736	3	HF11865/HF42003/HF18204
MF	GO:0030170	pyridoxal phosphate binding	12/2710	80/16678	0.665509	1	HF28915/HF32404/HF42672/HF23027/HF15559/HF03224/HF15125/HF34500/HF14845/HF27275/HF08006/HF32403	-/-/-/-/-/-/-/-/-/-/-/-	12	8	HF28915/HF23027/HF15559/HF15125/HF34500/HF14845/HF27275/HF32403	4	HF32404/HF42672/HF03224/HF08006
MF	GO:0070279	vitamin B6 binding	12/2710	80/16678	0.665509	1	HF28915/HF32404/HF42672/HF23027/HF15559/HF03224/HF15125/HF34500/HF14845/HF27275/HF08006/HF32403	-/-/-/-/-/-/-/-/-/-/-/-	12	8	HF28915/HF23027/HF15559/HF15125/HF34500/HF14845/HF27275/HF32403	4	HF32404/HF42672/HF03224/HF08006
MF	GO:0034062	5'-3' RNA polymerase activity	13/2710	87/16678	0.673952	1	HF08267/HF19273/HF28734/novel.1842/HF19271/novel.1920/HF05084/HF41806/HF43695/HF24504/novel.1550/HF07959/HF19245	-/-/-/-/-/-/-/-/-/-/-/-/-	13	7	HF08267/novel.1842/novel.1920/HF41806/HF24504/HF07959/HF19245	6	HF19273/HF28734/HF19271/HF05084/HF43695/novel.1550
MF	GO:0097747	RNA polymerase activity	13/2710	87/16678	0.673952	1	HF08267/HF19273/HF28734/novel.1842/HF19271/novel.1920/HF05084/HF41806/HF43695/HF24504/novel.1550/HF07959/HF19245	-/-/-/-/-/-/-/-/-/-/-/-/-	13	7	HF08267/novel.1842/novel.1920/HF41806/HF24504/HF07959/HF19245	6	HF19273/HF28734/HF19271/HF05084/HF43695/novel.1550
MF	GO:0015318	inorganic molecular entity transmembrane transporter activity	57/2710	369/16678	0.685019	1	HF32197/HF38080/HF18741/HF36070/HF24477/HF43202/HF23371/HF05696/HF10618/HF15920/HF10694/HF25447/HF09599/HF09568/HF20883/HF31536/HF23029/HF11571/HF39007/HF03202/HF42895/HF37328/HF23038/HF38621/HF28356/HF33978/HF13222/HF21270/HF23063/HF41837/HF03910/HF34519/HF40539/HF40223/HF13223/HF27944/HF08541/HF15622/HF06794/HF26009/HF02610/HF10670/HF23399/HF24211/HF37943/HF12755/HF10686/HF17231/HF04181/HF24277…	-/-/-/-/-/-/-/-/-/-/-/-/-/-/-/-/-/-/-/-/-/-/-/-/-/-/-/-/-/-/-/-/-/-/-/-/-/-/-/-/-/-/-/-/-/-/-/-/-/-/-/-/-/-/-/-/-	57	34	HF36070/HF24477/HF23371/HF10618/HF15920/HF10694/HF25447/HF09599/HF31536/HF23029/HF39007/HF03202/HF42895/HF37328/HF23038/HF33978/HF13222/HF23063/HF41837/HF34519/HF13223/HF27944/HF08541/HF15622/HF10670/HF23399/HF24211/HF37943/HF12755/HF10686/HF04181/HF34001/HF11939/HF10626	23	HF32197/HF38080/HF18741/HF43202/HF05696/HF09568/HF20883/HF11571/HF38621/HF28356/HF21270/HF03910/HF40539/HF40223/HF06794/HF26009/HF02610/HF17231/HF24277/HF30353/HF21230/HF13031/HF26664
MF	GO:0016157	sucrose synthase activity	2/2710	14/16678	0.689688	1	HF31763/HF32116	-/-	2	0		2	HF31763/HF32116
MF	GO:0016868	intramolecular transferase activity, phosphotransferases	2/2710	14/16678	0.689688	1	HF25002/HF16241	-/-	2	2	HF25002/HF16241	0
MF	GO:0046915	transition metal ion transmembrane transporter activity	2/2710	14/16678	0.689688	1	HF38080/HF40223	-/-	2	0		2	HF38080/HF40223
MF	GO:0016830	carbon-carbon lyase activity	11/2710	75/16678	0.692465	1	HF42124/HF07624/HF32087/HF42711/HF39239/HF42272/HF15125/HF26149/HF06019/HF42246/HF08006	-/-/-/-/-/-/-/-/-/-/-	11	6	HF42124/HF42711/HF39239/HF15125/HF06019/HF42246	5	HF07624/HF32087/HF42272/HF26149/HF08006
MF	GO:0004650	polygalacturonase activity	8/2710	56/16678	0.709501	1	HF10638/HF03399/HF00285/HF06968/HF23510/HF30168/HF33116/HF35108	-/-/-/-/-/-/-/-	8	5	HF10638/HF03399/HF00285/HF30168/HF33116	3	HF06968/HF23510/HF35108
MF	GO:0005543	phospholipid binding	8/2710	56/16678	0.709501	1	HF16685/HF29697/HF06610/HF06828/HF06827/HF17591/HF26459/HF07986	-/-/-/-/-/-/-/-	8	5	HF06828/HF06827/HF17591/HF26459/HF07986	3	HF16685/HF29697/HF06610
MF	GO:0003899	DNA-directed 5'-3' RNA polymerase activity	11/2710	77/16678	0.726031	1	HF08267/HF19273/HF28734/novel.1842/HF19271/novel.1920/HF05084/HF41806/HF43695/HF24504/HF19245	-/-/-/-/-/-/-/-/-/-/-	11	6	HF08267/novel.1842/novel.1920/HF41806/HF24504/HF19245	5	HF19273/HF28734/HF19271/HF05084/HF43695
MF	GO:0019207	kinase regulator activity	2/2710	15/16678	0.726568	1	HF40614/HF04741	-/-	2	1	HF40614	1	HF04741
MF	GO:0019887	protein kinase regulator activity	2/2710	15/16678	0.726568	1	HF40614/HF04741	-/-	2	1	HF40614	1	HF04741
MF	GO:0003690	double-stranded DNA binding	11/2710	78/16678	0.74189	1	HF25801/HF28512/HF41112/HF17984/HF16603/HF28727/HF00742/HF16612/HF03488/HF10654/HF01279	-/-/-/-/-/-/-/-/-/-/-	11	5	HF28512/HF16603/HF28727/HF16612/HF03488	6	HF25801/HF41112/HF17984/HF00742/HF10654/HF01279
MF	GO:0140103	catalytic activity, acting on a glycoprotein	3/2710	23/16678	0.746413	1	HF38061/HF13587/HF35129	-/-/-	3	0		3	HF38061/HF13587/HF35129
MF	GO:0033926	glycopeptide alpha-N-acetylgalactosaminidase activity	2/2710	16/16678	0.759662	1	HF38061/HF13587	-/-	2	0		2	HF38061/HF13587
MF	GO:0008374	O-acyltransferase activity	4/2710	31/16678	0.765184	1	HF13151/HF30930/HF06051/HF32368	-/-/-/-	4	1	HF32368	3	HF13151/HF30930/HF06051
MF	GO:0035251	UDP-glucosyltransferase activity	9/2710	66/16678	0.766198	1	HF29069/HF19048/HF39841/HF31763/HF17210/HF17213/HF41760/HF41761/HF32116	-/-/-/-/-/-/-/-/-	9	4	HF17210/HF17213/HF41760/HF41761	5	HF29069/HF19048/HF39841/HF31763/HF32116
MF	GO:0016645	oxidoreductase activity, acting on the CH-NH group of donors	3/2710	24/16678	0.77263	1	HF18323/HF21079/HF30727	-/-/-	3	3	HF18323/HF21079/HF30727	0
MF	GO:0015078	proton transmembrane transporter activity	18/2710	128/16678	0.78333	1	HF43202/HF05696/HF15920/HF25447/HF20883/HF31536/HF37328/HF28356/HF41837/HF27944/HF08541/HF15622/HF06794/HF37943/HF24277/HF21230/HF10626/HF26664	-/-/-/-/-/-/-/-/-/-/-/-/-/-/-/-/-/-	18	10	HF15920/HF25447/HF31536/HF37328/HF41837/HF27944/HF08541/HF15622/HF37943/HF10626	8	HF43202/HF05696/HF20883/HF28356/HF06794/HF24277/HF21230/HF26664
MF	GO:0016462	pyrophosphatase activity	74/2710	492/16678	0.78663	1	HF09309/HF42372/HF09522/HF21442/HF20998/HF31989/HF11254/HF24813/HF38047/HF40404/HF41084/HF28478/novel.3057/HF39183/HF03359/HF05224/HF40206/HF03225/HF14203/HF25700/HF11068/HF43582/HF05696/HF42661/HF07243/HF24577/HF28481/HF20777/HF15791/HF27643/HF37993/HF41914/HF09849/HF14176/HF12205/HF36483/HF04432/HF13779/HF02669/HF05220/HF19907/HF38275/HF26359/HF26339/HF05622/HF15825/HF02777/HF21610/HF06014/HF37…	-/-/-/-/-/-/-/-/-/-/-/-/-/-/-/-/-/-/-/-/-/-/-/-/-/-/-/-/-/-/-/-/-/-/-/-/-/-/-/-/-/-/-/-/-/-/-/-/-/-/-/-/-/-/-/-/-/-/-/-/-/-/-/-/-/-/-/-/-/-/-/-/-/-	74	40	HF09522/HF21442/HF31989/HF40404/novel.3057/HF39183/HF03359/HF05224/HF40206/HF03225/HF14203/HF25700/HF07243/HF20777/HF15791/HF27643/HF12205/HF13779/HF05220/HF38275/HF26359/HF05622/HF02777/HF37328/HF26340/HF28270/HF08406/HF09463/HF09521/HF15622/HF32047/HF16835/HF15891/HF19091/HF35014/HF13161/HF24894/HF37943/HF20183/HF36484	34	HF09309/HF42372/HF20998/HF11254/HF24813/HF38047/HF41084/HF28478/HF11068/HF43582/HF05696/HF42661/HF24577/HF28481/HF37993/HF41914/HF09849/HF14176/HF36483/HF04432/HF02669/HF19907/HF26339/HF15825/HF21610/HF06014/HF30503/HF03364/HF31992/HF00276/HF13330/HF27396/HF06775/HF15172
MF	GO:0046933	proton-transporting ATP synthase activity, rotational mechanism	2/2710	17/16678	0.789224	1	HF05696/HF37328	-/-	2	1	HF37328	1	HF05696
MF	GO:0008017	microtubule binding	17/2710	122/16678	0.790958	1	HF11254/HF40404/HF07243/HF42023/novel.3377/HF12205/HF12369/HF02669/HF38275/HF27091/HF21610/HF27396/HF09463/HF15891/HF19091/HF13161/novel.1692	-/-/-/-/-/-/-/-/-/-/-/-/-/-/-/-/-	17	11	HF40404/HF07243/HF42023/novel.3377/HF12205/HF12369/HF38275/HF09463/HF15891/HF19091/HF13161	6	HF11254/HF02669/HF27091/HF21610/HF27396/novel.1692
MF	GO:0004386	helicase activity	7/2710	54/16678	0.79624	1	HF42372/novel.3057/HF14203/HF25700/HF24577/HF37993/HF28270	-/-/-/-/-/-/-	7	4	novel.3057/HF14203/HF25700/HF28270	3	HF42372/HF24577/HF37993
MF	GO:0009055	electron transfer activity	25/2710	176/16678	0.798244	1	HF08641/HF40087/HF17112/HF05786/HF32622/HF10742/HF40998/HF05780/HF30402/HF30403/HF31536/HF08725/HF18542/HF32623/HF32618/HF26648/HF38665/HF32977/HF18546/HF09415/HF32932/novel.1909/HF07315/HF32619/HF21309	-/-/-/-/-/-/-/-/-/-/-/-/-/-/-/-/-/-/-/-/-/-/-/-/-	25	11	HF40087/HF05786/HF10742/HF40998/HF31536/HF08725/HF38665/HF32977/HF18546/HF09415/novel.1909	14	HF08641/HF17112/HF32622/HF05780/HF30402/HF30403/HF18542/HF32623/HF32618/HF26648/HF32932/HF07315/HF32619/HF21309
MF	GO:0005096	GTPase activator activity	4/2710	33/16678	0.807275	1	HF11725/HF16677/HF06818/novel.3301	-/-/-/-	4	3	HF11725/HF06818/novel.3301	1	HF16677
MF	GO:0004659	prenyltransferase activity	2/2710	18/16678	0.815529	1	HF17127/HF17133	-/-	2	0		2	HF17127/HF17133
MF	GO:0004743	pyruvate kinase activity	2/2710	18/16678	0.815529	1	HF37198/HF35913	-/-	2	0		2	HF37198/HF35913
MF	GO:0016763	transferase activity, transferring pentosyl groups	2/2710	18/16678	0.815529	1	HF02757/HF17525	-/-	2	2	HF02757/HF17525	0
MF	GO:0030955	potassium ion binding	2/2710	18/16678	0.815529	1	HF37198/HF35913	-/-	2	0		2	HF37198/HF35913
[truncated: 139 more rows]

## Sheet: 1Cvs3C_all_GOenrich_significant
Category	GOID	Description	GeneRatio	BgRatio	pvalue	padj	geneID	geneName	Count	Up	Up_Gene_id	Down	Down_Gene_id
[truncated: 20 more rows]

[truncated: 12 more sheets: 1Cvs3C_all_KEGGenrich, 1Cvs3C_all_KEGGenrich_significa, 1Cvs2C_all_KEGGenrich, 1Cvs2C_all_KEGGenrich_significa, 1Dvs3D_all_GOenrich, 1Dvs3D_all_GOenrich_significant, 1Dvs3D_all_KEGGenrich, 1Dvs3D_all_KEGGenrich_significa, 1Dvs2D_all_GOenrich, 1Dvs2D_all_GOenrich_significant, 1Dvs2D_all_KEGGenrich, 1Dvs2D_all_KEGGenrich_significa]
